# Supplementary material
Source: PubMed Central journal article supplement (PMC4987852)
Supplement: npp201657x1.pdf [file npp201657x1.pdf]

## Supplemental Information

Supplemental Table 1a: Participants' and participants' parents highest level of education.

|                                                                                      |                                                                                      | Early Adversity<br>(n=30) | Control Group<br>(n = 30) |
|--------------------------------------------------------------------------------------|--------------------------------------------------------------------------------------|---------------------------|---------------------------|
| Highest level of education N (%)                                                     |                                                                                      |                           |                           |
| Father                                                                               | Partial high school                                                                  | 7 (23.3)                  | 0 (0)                     |
|                                                                                      | High school graduate (9 <sup>th</sup> grade, German <i>Hauptschule</i> )             | 15 (50)                   | 17 (56.7)                 |
|                                                                                      | High school graduate (10 <sup>th</sup> grade, German <i>Realschule</i> )             | 3 (10)                    | 4 (13.3)                  |
|                                                                                      | Specialized secondary school (12 <sup>th</sup> grade, German <i>Fachoberschule</i> ) | 0 (0)                     | 1 (3.3)                   |
|                                                                                      | University entrance diploma (13 <sup>th</sup> grade, German <i>Abitur</i> )          | 1 (3.3)                   | 3 (10)                    |
|                                                                                      | University degree                                                                    | 4 (13.3)                  | 5 (16.7)                  |
|                                                                                      | Mother                                                                               | Partial high school       | 5 (16.7)                  |
| High school graduate (9 <sup>th</sup> grade, German <i>Hauptschule</i> )             |                                                                                      | 21 (70)                   | 22 (73.3)                 |
| High school graduate (10 <sup>th</sup> grade, German <i>Realschule</i> )             |                                                                                      | 1 (3.3)                   | 4 (13.3)                  |
| Specialized secondary school (12 <sup>th</sup> grade, German <i>Fachoberschule</i> ) |                                                                                      | 0 (0)                     | 1 (3.3)                   |
| University entrance diploma (13 <sup>th</sup> grade, German <i>Abitur</i> )          |                                                                                      | 1 (3.3)                   | 1 (3.3)                   |
| University degree                                                                    |                                                                                      | 2 (6.7)                   | 1 (3.3)                   |
| Participant                                                                          |                                                                                      | Partial high school       | 0 (0)                     |
|                                                                                      | High school graduate (9 <sup>th</sup> grade, German <i>Hauptschule</i> )             | 4 (13.3)                  | 2 (6.7)                   |
|                                                                                      | High school graduate (10 <sup>th</sup> grade, German <i>Realschule</i> )             | 6 (20)                    | 6 (20)                    |
|                                                                                      | Specialized secondary school (12 <sup>th</sup> grade, German <i>Fachoberschule</i> ) | 1 (3.3)                   | 1 (3.3)                   |
|                                                                                      | University entrance diploma (13 <sup>th</sup> grade, German <i>Abitur</i> )          | 6 (20)                    | 9 (30)                    |
|                                                                                      | University degree                                                                    | 13 (43.3)                 | 11 (36.7)                 |

Supplemental Table 1b: Further sample characteristics

|                    |                            | Early Adversity<br>(n=30) | Control Group<br>(n = 30) | <i>P</i> |
|--------------------|----------------------------|---------------------------|---------------------------|----------|
| Income             | childhood family<br>income | 1.67 ± 0.10               | 1.80 ± 0.81               | .570     |
|                    | current family income      | 2.43 ± 1.10               | 2.47 ± 1.01               | .903     |
| In a relationship  | <i>n</i> (%)               | 11 (36.7)                 | 12 (40.0)                 | .795     |
| No. of children    |                            | 1.80 ± 1.24               | 1.27 ± 1.23               | .100     |
| No. persons        | in household               | 2.13 ± 1.31               | 1.90 ± 1.23               | .461     |
| Body mass index    |                            | 25.29 ± 4.81              | 24.95 ± 3.6               | .755     |
| Waist to hip ratio |                            | 0.88 ± 0.10               | 0.85 ± 0.07               | .189     |
| Smoking            | <i>n</i> (%)               | 7 (23.3)                  | 4 (13.3)                  | .325     |

Income: assessed on a 1-4 scale (1= up to 1000€, 2 = up to 2000€, 3= up to 3000€, 4= more than 3000€)

## Supplemental Table 2

The table shows the transcripts which were up-regulated 45 minutes post-stress exposure compared to the pre-stress time-point in both groups. It shows the differences in log<sub>2</sub> expression values (t1-t0) across both groups, and separately for the control group and the early trauma group. The *p*-values result from the limma *t*-test. The *p*-values were multiplicity-adjusted to control the false discovery rate (FDR) by the Benjamini–Hochberg procedure.

t0: 45 minutes pre-stress exposure; t1: 45 minutes post-stress exposure.

| Agilent Probe ID | Gene Symbol    | Mean expression change across both groups t1-t0 (log <sub>2</sub> expression values) | Control Group (log <sub>2</sub> expression values t1- t0) | Early Adversity (log <sub>2</sub> expression values t1- t0) | <i>p</i> -value (main effect stress) | adj. <i>p</i> -value (main effect stress) |
|------------------|----------------|--------------------------------------------------------------------------------------|-----------------------------------------------------------|-------------------------------------------------------------|--------------------------------------|-------------------------------------------|
| A_23_P121596     | PPBP           | 2,39                                                                                 | 1,96                                                      | 3,05                                                        | <0.001                               | <0.001                                    |
| A_24_P79403      | PF4            | 2,22                                                                                 | 1,82                                                      | 2,80                                                        | <0.001                               | <0.001                                    |
| A_23_P416581     | GNAZ           | 1,23                                                                                 | 0,92                                                      | 1,52                                                        | <0.001                               | 0.001                                     |
| A_23_P29124      | GP1BB          | 1,13                                                                                 | 0,94                                                      | 1,52                                                        | <0.001                               | 0.010                                     |
| A_23_P72668      | SDPR           | 1,00                                                                                 | 0,97                                                      | 1,27                                                        | <0.001                               | 0.014                                     |
| A_23_P214080     | EGR1           | 0,99                                                                                 | 0,93                                                      | 1,05                                                        | <0.001                               | <0.001                                    |
| A_21_P0002805    | XLOC_002921    | 0,85                                                                                 | 0,66                                                      | 1,07                                                        | <0.001                               | 0.007                                     |
| A_23_P398566     | NR4A3          | 0,84                                                                                 | 0,68                                                      | 1,17                                                        | <0.001                               | 0.009                                     |
| A_33_P3265030    | GP1BB          | 0,84                                                                                 | 0,55                                                      | 1,31                                                        | <0.001                               | 0.027                                     |
| A_23_P210425     | MYL9           | 0,80                                                                                 | 0,93                                                      | 0,88                                                        | <0.001                               | 0.021                                     |
| A_33_P3381777    | TREML1         | 0,78                                                                                 | 0,63                                                      | 1,11                                                        | 0.002                                | 0.087                                     |
| A_23_P152838     | CCL5           | 0,77                                                                                 | 0,78                                                      | 1,01                                                        | <0.001                               | 0.025                                     |
| A_33_P3332955    | CLEC1B         | 0,76                                                                                 | 0,87                                                      | 0,69                                                        | 0.001                                | 0.050                                     |
| A_24_P228550     | TUBB1          | 0,75                                                                                 | 0,54                                                      | 1,01                                                        | 0.001                                | 0.063                                     |
| A_19_P00321743   | LOC100130938   | 0,74                                                                                 | 0,56                                                      | 0,97                                                        | 0.001                                | 0.064                                     |
| A_19_P00315452   | LOC100130938   | 0,72                                                                                 | 0,53                                                      | 1,17                                                        | 0.002                                | 0.095                                     |
| A_33_P3323136    | ENKUR          | 0,71                                                                                 | 0,51                                                      | 1,21                                                        | 0.001                                | 0.079                                     |
| A_21_P0011632    | XLOC_I2_005997 | 0,70                                                                                 | 1,02                                                      | 0,19                                                        | 0.002                                | 0.107                                     |
| A_23_P89589      | PER1           | 0,68                                                                                 | 0,81                                                      | 0,35                                                        | <0.001                               | <0.001                                    |
| A_33_P3393801    | PDZK1IP1       | 0,67                                                                                 | 0,32                                                      | 1,13                                                        | 0.006                                | 0.198                                     |
| A_33_P3236065    | CLEC1B         | 0,65                                                                                 | 0,64                                                      | 0,71                                                        | <0.001                               | 0.034                                     |
| A_21_P0009714    | XLOC_013045    | 0,63                                                                                 | 0,53                                                      | 0,69                                                        | <0.001                               | 0.005                                     |
| A_21_P0004829    | XLOC_005150    | 0,59                                                                                 | 0,16                                                      | 0,56                                                        | 0.018                                | 0.353                                     |
| A_24_P277367     | CXCL5          | 0,59                                                                                 | 0,65                                                      | 0,64                                                        | 0.003                                | 0.133                                     |
| A_33_P3310780    | CTTN           | 0,59                                                                                 | 0,36                                                      | 1,01                                                        | 0.020                                | 0.365                                     |
| A_33_P3283646    |                | 0,57                                                                                 | 0,68                                                      | 0,26                                                        | 0.016                                | 0.331                                     |
| A_21_P0013162    | LOC729178      | 0,56                                                                                 | 0,32                                                      | 0,51                                                        | 0.011                                | 0.276                                     |
| A_23_P435636     | DAND5          | 0,55                                                                                 | 0,52                                                      | 0,21                                                        | 0.013                                | 0.297                                     |
| A_23_P53137      | HBG1           | 0,54                                                                                 | 0,35                                                      | 0,89                                                        | 0.022                                | 0.375                                     |
| A_33_P3217119    | OSCP1          | 0,53                                                                                 | 0,37                                                      | 0,52                                                        | 0.006                                | 0.200                                     |
| A_32_P158786     | C12orf56       | 0,53                                                                                 | 0,42                                                      | 0,38                                                        | 0.023                                | 0.386                                     |
| A_32_P196142     | LOC100130938   | 0,53                                                                                 | 0,21                                                      | 0,97                                                        | 0.027                                | 0.407                                     |
| A_23_P107775     | TMEM190        | 0,52                                                                                 | 0,17                                                      | 0,78                                                        | 0.039                                | 0.467                                     |
| A_23_P307544     | PLXNA2         | 0,51                                                                                 | 0,61                                                      | 0,38                                                        | 0.006                                | 0.196                                     |

|                |                |      |       |      |        |        |
|----------------|----------------|------|-------|------|--------|--------|
| A_33_P3236071  | CLEC1B         | 0,51 | 0,36  | 0,61 | 0.042  | 0.481  |
| A_21_P0002706  | XLOC_002859    | 0,51 | 0,46  | 0,41 | 0.008  | 0.241  |
| A_23_P46936    | EGR2           | 0,50 | 0,46  | 0,68 | <0.001 | 0.025  |
| A_23_P126613   | AQP10          | 0,50 | 0,41  | 0,68 | 0.037  | 0.456  |
| A_33_P3245937  | LOC100128402   | 0,50 | 0,09  | 0,62 | 0.039  | 0.467  |
| A_21_P0008579  | XLOC_011513    | 0,49 | 0,28  | 0,55 | 0.001  | 0.055  |
| A_33_P3303372  | PARD3          | 0,49 | 0,46  | 0,43 | 0.005  | 0.180  |
| A_21_P0001059  | XLOC_000554    | 0,49 | 0,13  | 0,63 | 0.003  | 0.136  |
| A_21_P0013510  | XLOC_I2_014459 | 0,49 | 0,38  | 0,68 | 0.036  | 0.455  |
| A_33_P3356816  | LCE1B          | 0,47 | 0,29  | 0,30 | 0.010  | 0.267  |
| A_21_P0012891  | LOC729506      | 0,47 | 0,53  | 0,45 | 0.013  | 0.301  |
| A_23_P1492     | AVPI1          | 0,47 | 0,49  | 0,41 | <0.001 | <0.001 |
| A_33_P3321642  | GRHL2          | 0,47 | 0,40  | 0,43 | 0.032  | 0.434  |
| A_21_P0012314  | XLOC_I2_009302 | 0,46 | 0,06  | 0,62 | 0.002  | 0.115  |
| A_23_P152906   | ALOX12         | 0,45 | 0,25  | 0,77 | 0.015  | 0.326  |
| A_33_P3379881  |                | 0,45 | 0,74  | 0,13 | 0.016  | 0.334  |
| A_24_P125434   | TXNDC2         | 0,45 | 0,18  | 0,64 | 0.004  | 0.146  |
| A_24_P142118   | THBS1          | 0,45 | 0,54  | 0,28 | <0.001 | 0.011  |
| A_21_P0000898  | LOC100131234   | 0,44 | 0,41  | 0,37 | <0.001 | <0.001 |
| A_21_P0004452  | XLOC_005036    | 0,44 | 0,22  | 0,62 | 0.003  | 0.121  |
| A_19_P00810465 | KCNA6          | 0,44 | 0,33  | 0,49 | 0.009  | 0.251  |
| A_23_P76312    | GUCY2C         | 0,43 | 0,44  | 0,44 | 0.001  | 0.079  |
| A_21_P0006982  | XLOC_008769    | 0,43 | 0,37  | 0,69 | 0.009  | 0.251  |
| A_19_P00810491 | XLOC_014068    | 0,43 | 0,52  | 0,09 | 0.039  | 0.469  |
| A_21_P0004682  | LOC643623      | 0,43 | 0,51  | 0,17 | 0.032  | 0.433  |
| A_33_P3429242  | LOC339988      | 0,43 | 0,80  | 0,17 | 0.042  | 0.481  |
| A_33_P3270826  | THEM5          | 0,43 | 0,17  | 0,53 | 0.019  | 0.357  |
| A_33_P3382565  | KIF26B         | 0,43 | 0,57  | 0,24 | <0.001 | 0.010  |
| A_33_P3887888  | FLJ44511       | 0,43 | 0,46  | 0,41 | 0.029  | 0.420  |
| A_33_P3257643  | C17orf104      | 0,42 | 0,43  | 0,40 | 0.005  | 0.194  |
| A_21_P0000010  | FKBP5          | 0,42 | 0,56  | 0,24 | 0.018  | 0.356  |
| A_32_P191262   | ACR            | 0,42 | 0,07  | 0,73 | 0.002  | 0.112  |
| A_19_P00322836 | XLOC_005056    | 0,41 | 0,53  | 0,33 | 0.005  | 0.187  |
| A_21_P0008363  | XLOC_010891    | 0,41 | 0,26  | 0,42 | 0.011  | 0.283  |
| A_24_P126892   |                | 0,41 | -0,04 | 0,66 | 0.001  | 0.054  |
| A_33_P3232692  | IL24           | 0,41 | 0,36  | 0,30 | 0.004  | 0.146  |
| A_23_P131024   | ZBTB32         | 0,41 | 0,33  | 0,47 | 0.008  | 0.237  |
| A_19_P00318679 | XLOC_011510    | 0,41 | 0,54  | 0,00 | 0.019  | 0.362  |
| A_33_P3276748  | LOC100128573   | 0,41 | 0,32  | 0,36 | 0.009  | 0.251  |
| A_23_P17844    | PVALB          | 0,41 | 0,50  | 0,47 | 0.048  | 0.508  |
| A_21_P0008786  | XLOC_011590    | 0,41 | 0,45  | 0,40 | <0.001 | <0.001 |
| A_33_P3396891  | AVPI1          | 0,41 | 0,42  | 0,34 | <0.001 | <0.001 |
| A_21_P0002453  | XLOC_002131    | 0,41 | 0,31  | 0,53 | 0.015  | 0.320  |
| A_21_P0004969  | XLOC_005539    | 0,41 | 0,56  | 0,13 | 0.008  | 0.244  |
| A_21_P0007888  | XLOC_010172    | 0,41 | 0,26  | 0,43 | 0.006  | 0.201  |
| A_33_P3248137  | OLFML2A        | 0,40 | 0,43  | 0,38 | 0.030  | 0.425  |
| A_21_P0004955  | XLOC_005502    | 0,40 | 0,28  | 0,52 | 0.015  | 0.330  |
| A_23_P82324    | CARD11         | 0,39 | 0,31  | 0,30 | 0.001  | 0.050  |
| A_23_P359277   | ELOVL7         | 0,39 | 0,29  | 0,60 | 0.026  | 0.398  |
| A_33_P3277784  | NTNG2          | 0,39 | 0,53  | 0,15 | 0.009  | 0.251  |

|               |                |      |       |      |        |       |
|---------------|----------------|------|-------|------|--------|-------|
| A_23_P165608  | SEMA4F         | 0,39 | -0,01 | 0,69 | 0.030  | 0.423 |
| A_23_P25698   | SLC10A1        | 0,39 | 0,29  | 0,40 | 0.045  | 0.494 |
| A_33_P3375636 | FAM196B        | 0,39 | 0,12  | 0,51 | 0.015  | 0.320 |
| A_32_P214665  | PCP4L1         | 0,39 | 0,18  | 0,56 | 0.009  | 0.259 |
| A_23_P82762   | ZNF596         | 0,39 | 0,40  | 0,41 | 0.016  | 0.332 |
| A_23_P361654  |                | 0,39 | 0,41  | 0,48 | 0.011  | 0.275 |
| A_21_P0008560 | XLOC_011295    | 0,38 | -0,02 | 0,53 | 0.016  | 0.332 |
| A_21_P0001493 | XLOC_000794    | 0,38 | 0,27  | 0,59 | 0.014  | 0.312 |
| A_21_P0002412 | XLOC_002013    | 0,38 | 0,16  | 0,56 | 0.007  | 0.226 |
| A_21_P0011105 | XLOC_I2_003593 | 0,38 | 0,33  | 0,36 | 0.019  | 0.359 |
| A_21_P0002546 | XLOC_002499    | 0,38 | 0,28  | 0,38 | 0.002  | 0.109 |
| A_33_P3333752 | FAM183A        | 0,37 | 0,45  | 0,17 | 0.004  | 0.146 |
| A_24_P49106   | TCEAL7         | 0,37 | 0,31  | 0,28 | 0.031  | 0.427 |
| A_33_P3313075 |                | 0,37 | 0,12  | 0,56 | 0.007  | 0.226 |
| A_21_P0014599 | LOC100506007   | 0,37 | 0,40  | 0,18 | 0.009  | 0.259 |
| A_33_P3416142 | LOC100131234   | 0,37 | 0,60  | 0,04 | <0.001 | 0.007 |
| A_33_P3567961 |                | 0,36 | 0,36  | 0,30 | 0.002  | 0.115 |
| A_33_P3839897 | RNU4ATAC       | 0,36 | 0,18  | 0,22 | 0.019  | 0.361 |
| A_21_P0007189 | XLOC_009092    | 0,36 | 0,55  | 0,11 | 0.007  | 0.232 |
| A_21_P0010313 | XLOC_013949    | 0,36 | 0,27  | 0,33 | 0.027  | 0.409 |
| A_21_P0007894 | VSIG10         | 0,36 | 0,43  | 0,36 | 0.031  | 0.427 |
| A_21_P0013104 | XLOC_I2_013149 | 0,36 | 0,40  | 0,18 | 0.020  | 0.365 |
| A_23_P159335  | CD8B           | 0,36 | 0,26  | 0,37 | 0.009  | 0.259 |
| A_23_P141092  | TFAP4          | 0,36 | 0,35  | 0,40 | 0.014  | 0.318 |
| A_23_P90320   | ZNF221         | 0,36 | 0,50  | 0,05 | 0.016  | 0.331 |
| A_33_P3321025 | PLXNA4         | 0,36 | 0,08  | 0,61 | 0.047  | 0.503 |
| A_32_P157927  |                | 0,36 | 0,20  | 0,35 | 0.005  | 0.184 |
| A_33_P3316088 |                | 0,36 | 0,32  | 0,39 | 0.007  | 0.229 |
| A_21_P0007977 | XLOC_010543    | 0,35 | 0,49  | 0,11 | 0.021  | 0.374 |
| A_24_P305784  | SPANXB2        | 0,35 | 0,27  | 0,42 | 0.022  | 0.380 |
| A_32_P14457   |                | 0,35 | 0,34  | 0,27 | 0.047  | 0.503 |
| A_23_P250164  | HGD            | 0,35 | 0,29  | 0,44 | 0.034  | 0.445 |
| A_23_P58228   | ODAM           | 0,35 | 0,30  | 0,23 | 0.030  | 0.424 |
| A_23_P126349  | BARHL2         | 0,35 | 0,37  | 0,31 | 0.022  | 0.376 |
| A_21_P0002050 | XLOC_002089    | 0,35 | 0,13  | 0,36 | 0.002  | 0.115 |
| A_33_P3402257 | MS4A18         | 0,35 | 0,33  | 0,28 | 0.020  | 0.363 |
| A_24_P13083   | TSPAN18        | 0,35 | 0,48  | 0,15 | 0.018  | 0.357 |
| A_21_P0003711 | WHSC2          | 0,35 | 0,33  | 0,32 | 0.011  | 0.276 |
| A_33_P3292994 |                | 0,35 | 0,13  | 0,28 | 0.026  | 0.400 |
| A_23_P74162   | IQCC           | 0,35 | 0,24  | 0,27 | 0.011  | 0.274 |
| A_21_P0010323 | XLOC_014105    | 0,35 | 0,26  | 0,34 | 0.038  | 0.463 |
| A_33_P3371703 |                | 0,35 | 0,39  | 0,28 | 0.007  | 0.226 |
| A_33_P3420879 | LOC646482      | 0,35 | 0,41  | 0,18 | 0.024  | 0.390 |
| A_23_P326303  | GPR61          | 0,34 | 0,18  | 0,34 | 0.007  | 0.229 |
| A_23_P71328   | MATN2          | 0,34 | 0,43  | 0,12 | 0.011  | 0.283 |
| A_24_P144784  | HILS1          | 0,34 | 0,40  | 0,24 | 0.019  | 0.363 |
| A_21_P0003655 | XLOC_003704    | 0,34 | 0,34  | 0,15 | 0.013  | 0.304 |
| A_33_P3231645 |                | 0,34 | 0,48  | 0,22 | 0.006  | 0.205 |
| A_21_P0012065 | XLOC_I2_008008 | 0,34 | 0,47  | 0,23 | 0.022  | 0.378 |
| A_33_P3285799 | AKD1           | 0,34 | 0,36  | 0,18 | 0.027  | 0.405 |

|                |                |      |      |      |        |       |
|----------------|----------------|------|------|------|--------|-------|
| A_33_P3402943  | LOC100128591   | 0,34 | 0,23 | 0,28 | 0.010  | 0.264 |
| A_24_P931201   | LOC100130071   | 0,34 | 0,36 | 0,27 | 0.034  | 0.446 |
| A_23_P143173   | SLA2           | 0,34 | 0,30 | 0,34 | 0.009  | 0.251 |
| A_33_P3213408  | OR10AD1        | 0,34 | 0,50 | 0,12 | 0.018  | 0.354 |
| A_33_P3312489  | VWA3B          | 0,34 | 0,10 | 0,39 | 0.013  | 0.296 |
| A_33_P3461416  | GP6            | 0,34 | 0,26 | 0,53 | 0.027  | 0.407 |
| A_21_P0001827  | XLOC_001355    | 0,34 | 0,28 | 0,29 | 0.033  | 0.439 |
| A_33_P3354291  | KIAA1656       | 0,34 | 0,50 | 0,03 | 0.033  | 0.439 |
| A_33_P3385993  | TTLL9          | 0,34 | 0,42 | 0,05 | 0.019  | 0.361 |
| A_23_P121657   | HS3ST1         | 0,34 | 0,29 | 0,32 | 0.001  | 0.050 |
| A_21_P0000558  | LOC100302650   | 0,34 | 0,08 | 0,56 | 0.016  | 0.332 |
| A_33_P3317442  | MCF2L          | 0,33 | 0,33 | 0,30 | 0.024  | 0.389 |
| A_33_P3244784  |                | 0,33 | 0,31 | 0,27 | 0.024  | 0.389 |
| A_21_P0009138  | XLOC_012043    | 0,33 | 0,11 | 0,42 | 0.017  | 0.343 |
| A_33_P3274955  | TKTL2          | 0,33 | 0,57 | 0,10 | 0.030  | 0.424 |
| A_33_P3262083  | LOC100126784   | 0,33 | 0,33 | 0,19 | 0.008  | 0.241 |
| A_21_P0010863  | LINC00202      | 0,33 | 0,26 | 0,30 | 0.022  | 0.375 |
| A_33_P3245818  | PQLC1          | 0,33 | 0,13 | 0,30 | 0.015  | 0.320 |
| A_33_P3282305  | ADARB2         | 0,33 | 0,32 | 0,10 | 0.006  | 0.197 |
| A_33_P3404546  | OBSCN          | 0,33 | 0,22 | 0,38 | 0.029  | 0.421 |
| A_33_P3236686  |                | 0,33 | 0,06 | 0,44 | 0.033  | 0.439 |
| A_33_P3253304  | LOC100270710   | 0,33 | 0,53 | 0,13 | 0.027  | 0.409 |
| A_33_P3355580  | CTSL3          | 0,32 | 0,36 | 0,14 | 0.018  | 0.356 |
| A_21_P0007241  | LOC100289388   | 0,32 | 0,24 | 0,26 | 0.038  | 0.464 |
| A_33_P3404989  | HIST1H3H       | 0,32 | 0,45 | 0,31 | 0.027  | 0.405 |
| A_21_P0010216  | XLOC_014115    | 0,32 | 0,20 | 0,45 | 0.035  | 0.449 |
| A_21_P0010611  | XLOC_I2_000900 | 0,32 | 0,38 | 0,25 | 0.021  | 0.370 |
| A_21_P0011336  | LOC440300      | 0,32 | 0,29 | 0,29 | 0.044  | 0.488 |
| A_33_P3260862  |                | 0,32 | 0,04 | 0,69 | 0.047  | 0.505 |
| A_33_P3412311  | LOC100132859   | 0,32 | 0,32 | 0,25 | 0.036  | 0.455 |
| A_23_P110531   | FST            | 0,32 | 0,12 | 0,41 | 0.006  | 0.200 |
| A_21_P0006799  | XLOC_008981    | 0,32 | 0,30 | 0,22 | 0.012  | 0.288 |
| A_24_P144303   | LOC442459      | 0,32 | 0,24 | 0,26 | 0.019  | 0.361 |
| A_23_P104804   | ZBTB16         | 0,32 | 0,38 | 0,23 | 0.018  | 0.348 |
| A_23_P34424    | KCNQ4          | 0,32 | 0,28 | 0,49 | 0.032  | 0.435 |
| A_21_P0004086  | XLOC_004682    | 0,32 | 0,16 | 0,47 | 0.021  | 0.372 |
| A_33_P3363254  |                | 0,32 | 0,13 | 0,37 | 0.026  | 0.402 |
| A_23_P312565   | ANKRD19P       | 0,31 | 0,46 | 0,08 | 0.019  | 0.361 |
| A_33_P3347099  | FLJ36000       | 0,31 | 0,29 | 0,26 | 0.026  | 0.401 |
| A_23_P415401   | KLF9           | 0,31 | 0,41 | 0,10 | <0.001 | 0.011 |
| A_21_P0002554  | XLOC_002540    | 0,31 | 0,20 | 0,28 | 0.028  | 0.412 |
| A_23_P83134    | GAS1           | 0,31 | 0,31 | 0,30 | 0.027  | 0.407 |
| A_24_P409985   | TMEM44         | 0,31 | 0,30 | 0,13 | 0.033  | 0.441 |
| A_33_P3297005  | EME2           | 0,31 | 0,30 | 0,24 | 0.008  | 0.237 |
| A_19_P00319155 | LOC100126447   | 0,31 | 0,37 | 0,24 | 0.009  | 0.251 |
| A_23_P150693   | FJX1           | 0,31 | 0,51 | 0,09 | 0.034  | 0.444 |
| A_33_P3355252  |                | 0,31 | 0,18 | 0,48 | 0.044  | 0.491 |
| A_33_P3378412  |                | 0,31 | 0,19 | 0,32 | 0.023  | 0.387 |
| A_23_P2258     | CCDC62         | 0,31 | 0,28 | 0,20 | 0.018  | 0.353 |
| A_23_P140190   | KIAA0125       | 0,30 | 0,13 | 0,28 | 0.049  | 0.514 |

|                |                |      |       |       |        |       |
|----------------|----------------|------|-------|-------|--------|-------|
| A_21_P0006517  | XLOC_008072    | 0,30 | 0,24  | 0,35  | 0.046  | 0.495 |
| A_23_P51690    | RHBG           | 0,30 | 0,15  | 0,41  | 0.028  | 0.415 |
| A_21_P0012073  | XLOC_I2_008124 | 0,30 | 0,00  | 0,52  | 0.045  | 0.494 |
| A_21_P0008980  | XLOC_011804    | 0,30 | 0,36  | 0,24  | 0.031  | 0.427 |
| A_19_P00315493 | LOC145474      | 0,30 | 0,19  | 0,33  | 0.001  | 0.067 |
| A_33_P3327697  | LOC145474      | 0,30 | 0,19  | 0,32  | 0.001  | 0.062 |
| A_33_P3327076  | OR2T27         | 0,30 | 0,19  | 0,38  | 0.017  | 0.340 |
| A_21_P0009928  | XLOC_013437    | 0,30 | 0,24  | 0,26  | 0.014  | 0.318 |
| A_33_P3294415  |                | 0,30 | 0,18  | 0,33  | 0.022  | 0.376 |
| A_33_P3415820  | THBS1          | 0,30 | 0,47  | 0,19  | 0.010  | 0.260 |
| A_33_P3343820  | RP1-177G6.2    | 0,30 | 0,40  | 0,16  | 0.020  | 0.363 |
| A_23_P311875   | CD6            | 0,30 | 0,26  | 0,36  | 0.028  | 0.415 |
| A_33_P3252333  | SNORD3B-1      | 0,30 | 0,09  | 0,44  | 0.009  | 0.259 |
| A_19_P00317910 | XLOC_I2_015034 | 0,30 | 0,36  | 0,33  | <0.001 | 0.009 |
| A_21_P0001036  | XLOC_000497    | 0,30 | 0,30  | 0,19  | 0.035  | 0.450 |
| A_33_P3262927  | PCBP4          | 0,29 | 0,32  | 0,27  | 0.037  | 0.457 |
| A_21_P0005652  | XLOC_006704    | 0,29 | 0,35  | 0,25  | 0.043  | 0.484 |
| A_33_P3299119  | HNF1A          | 0,29 | 0,23  | 0,15  | 0.022  | 0.376 |
| A_21_P0002012  | XLOC_001975    | 0,29 | 0,48  | -0,05 | 0.020  | 0.365 |
| A_24_P154037   | IRS2           | 0,29 | 0,39  | 0,10  | <0.001 | 0.001 |
| A_33_P3216200  |                | 0,29 | 0,13  | 0,28  | 0.037  | 0.460 |
| A_32_P33083    | VCX2           | 0,29 | 0,26  | 0,33  | 0.018  | 0.354 |
| A_21_P0000223  | SNORD15B       | 0,29 | 0,12  | 0,32  | 0.005  | 0.177 |
| A_21_P0009932  | PLCB1          | 0,29 | 0,21  | 0,38  | 0.010  | 0.261 |
| A_33_P3263651  | SEMA6B         | 0,29 | 0,08  | 0,35  | 0.029  | 0.419 |
| A_33_P3284763  | DMD            | 0,29 | 0,14  | 0,35  | 0.026  | 0.400 |
| A_33_P3343145  | MAP1B          | 0,29 | 0,34  | 0,07  | 0.041  | 0.476 |
| A_23_P153183   | CNKSR2         | 0,29 | -0,01 | 0,48  | 0.007  | 0.226 |
| A_33_P3345299  |                | 0,28 | 0,23  | 0,20  | 0.017  | 0.342 |
| A_23_P250385   | HIST1H1B       | 0,28 | 0,31  | 0,27  | 0.011  | 0.274 |
| A_21_P0011473  | XLOC_I2_005458 | 0,28 | 0,36  | 0,06  | 0.019  | 0.357 |
| A_23_P422933   | ARHGAP20       | 0,28 | -0,10 | 0,57  | 0.044  | 0.489 |
| A_21_P0008836  | XLOC_011339    | 0,28 | 0,10  | 0,28  | 0.013  | 0.304 |
| A_33_P3389028  |                | 0,28 | 0,51  | 0,07  | 0.042  | 0.481 |
| A_19_P00318375 | LOC148696      | 0,28 | 0,30  | 0,36  | 0.038  | 0.462 |
| A_33_P3281745  |                | 0,28 | 0,15  | 0,27  | 0.024  | 0.389 |
| A_21_P0006378  | XLOC_007662    | 0,28 | 0,16  | 0,10  | 0.037  | 0.455 |
| A_23_P392429   | ZNF396         | 0,28 | 0,39  | 0,16  | 0.015  | 0.321 |
| A_21_P0002920  | XLOC_003383    | 0,28 | 0,16  | 0,45  | 0.036  | 0.453 |
| A_33_P3313065  | OR5C1          | 0,28 | 0,30  | 0,18  | 0.042  | 0.481 |
| A_21_P0000065  | SLC1A3         | 0,27 | 0,51  | 0,11  | 0.046  | 0.499 |
| A_21_P0012911  | LOC100652810   | 0,27 | 0,20  | 0,27  | 0.020  | 0.368 |
| A_21_P0008456  | XLOC_011064    | 0,27 | 0,32  | 0,23  | 0.041  | 0.477 |
| A_33_P3376449  | ZDHHC23        | 0,27 | 0,13  | 0,25  | 0.015  | 0.323 |
| A_21_P0005402  | XLOC_006178    | 0,27 | 0,17  | 0,25  | 0.037  | 0.458 |
| A_23_P342727   | STARD13        | 0,27 | 0,15  | 0,36  | 0.023  | 0.381 |
| A_33_P3808516  |                | 0,27 | 0,09  | 0,32  | 0.045  | 0.492 |
| A_33_P3389653  | PDE4D          | 0,27 | 0,23  | 0,20  | 0.003  | 0.137 |
| A_21_P0008247  | XLOC_010544    | 0,27 | 0,40  | 0,13  | 0.047  | 0.504 |
| A_33_P3356863  | LOC100128172   | 0,27 | 0,15  | 0,16  | 0.037  | 0.459 |

|                |                |      |       |       |       |       |
|----------------|----------------|------|-------|-------|-------|-------|
| A_21_P0012302  | XLOC_I2_009578 | 0,27 | 0,43  | 0,08  | 0.033 | 0.438 |
| A_33_P3341429  | NEXN           | 0,27 | 0,32  | 0,41  | 0.042 | 0.481 |
| A_21_P0011301  | WHAMMP2        | 0,27 | 0,19  | 0,43  | 0.030 | 0.423 |
| A_21_P0003230  | XLOC_002653    | 0,27 | 0,20  | 0,20  | 0.034 | 0.446 |
| A_21_P0010420  | XLOC_014264    | 0,27 | 0,34  | 0,14  | 0.014 | 0.318 |
| A_23_P98070    | PDE6C          | 0,27 | 0,31  | 0,14  | 0.026 | 0.403 |
| A_33_P3228295  | RCL1           | 0,27 | 0,29  | 0,14  | 0.043 | 0.485 |
| A_24_P696470   | HEATR4         | 0,27 | 0,22  | 0,26  | 0.032 | 0.435 |
| A_21_P0014595  | LOC100505856   | 0,27 | 0,28  | 0,20  | 0.047 | 0.504 |
| A_33_P3223022  |                | 0,27 | 0,34  | -0,08 | 0.048 | 0.511 |
| A_23_P35995    | CLMP           | 0,27 | 0,14  | 0,39  | 0.006 | 0.206 |
| A_21_P0013027  | XLOC_I2_012584 | 0,27 | -0,02 | 0,33  | 0.041 | 0.479 |
| A_21_P0000462  | SNORD19B       | 0,27 | 0,14  | 0,24  | 0.030 | 0.423 |
| A_21_P0012111  | XLOC_I2_008546 | 0,27 | 0,28  | 0,22  | 0.031 | 0.427 |
| A_23_P101683   | CLC            | 0,27 | 0,20  | 0,25  | 0.027 | 0.405 |
| A_32_P89352    | MACROD2        | 0,27 | 0,33  | 0,04  | 0.001 | 0.081 |
| A_21_P0004276  | XLOC_004467    | 0,27 | 0,27  | 0,34  | 0.018 | 0.354 |
| A_33_P3388482  | TMEM120B       | 0,27 | 0,28  | 0,26  | 0.042 | 0.481 |
| A_19_P00315826 | XLOC_001148    | 0,27 | 0,50  | -0,03 | 0.035 | 0.448 |
| A_21_P0005786  | XLOC_006976    | 0,27 | 0,05  | 0,39  | 0.037 | 0.457 |
| A_24_P386746   | RBP5           | 0,27 | 0,21  | 0,10  | 0.046 | 0.495 |
| A_21_P0013683  | XLOC_I2_015336 | 0,26 | 0,24  | 0,20  | 0.028 | 0.413 |
| A_33_P3872301  | SNAR-C3        | 0,26 | 0,25  | 0,18  | 0.031 | 0.429 |
| A_33_P3384578  |                | 0,26 | 0,10  | 0,28  | 0.025 | 0.394 |
| A_21_P0009205  | XLOC_012590    | 0,26 | 0,30  | 0,18  | 0.016 | 0.339 |
| A_33_P3261828  | LOC390660      | 0,26 | 0,23  | 0,14  | 0.031 | 0.427 |



### Supplemental Table 3

The table shows the transcripts which were down-regulated 45 minutes post-stress exposure compared to the pre-stress timepoint in both groups. It shows the differences in log2 expression values (t1-t0) across both groups, and separately for the control group and the early adversity group. The *p*-values result from the limma *t*-test. The *p*-values were multiplicity-adjusted to control the false discovery rate (FDR) by the Benjamini–Hochberg procedure.

t0: 45 minutes pre-stress exposure; t1: 45 minutes post-stress exposure

| Agilent Probe ID | Gene Symbol    | Mean expression change across both groups t1-t0 (log2 expression values) | Control Group (log2 expression values t1- t0) | Early Adversity (log2 expression values t1- t0) | p-value (main effect stress) | adj. p-value (main effect stress) |
|------------------|----------------|--------------------------------------------------------------------------|-----------------------------------------------|-------------------------------------------------|------------------------------|-----------------------------------|
| A_33_P3318766    |                | -0,68                                                                    | -0,20                                         | -1,15                                           | 0.016                        | 0.272                             |
| A_23_P204286     | MGP            | -0,64                                                                    | -0,61                                         | -0,67                                           | 0.003                        | 0.103                             |
| A_33_P3593774    | PIK3R3         | -0,61                                                                    | -0,66                                         | -0,56                                           | <0.001                       | 0.006                             |
| A_33_P3385351    |                | -0,59                                                                    | -0,19                                         | -1,00                                           | 0.039                        | 0.404                             |
| A_21_P0014451    | LOC100287506   | -0,53                                                                    | -0,55                                         | -0,52                                           | 0.032                        | 0.374                             |
| A_33_P3402091    | MERTK          | -0,50                                                                    | -0,49                                         | -0,52                                           | <0.001                       | 0.027                             |
| A_21_P0002470    | XLOC_002194    | -0,50                                                                    | -0,61                                         | -0,40                                           | 0.001                        | 0.036                             |
| A_33_P3316978    | RNF207         | -0,50                                                                    | -0,48                                         | -0,53                                           | <0.001                       | 0.024                             |
| A_33_P3255434    | MEG3           | -0,50                                                                    | -0,50                                         | -0,50                                           | <0.001                       | 0.001                             |
| A_33_P3321372    | CNTNAP3        | -0,49                                                                    | -0,67                                         | -0,31                                           | 0.008                        | 0.186                             |
| A_23_P376036     | EXD1           | -0,49                                                                    | -0,54                                         | -0,43                                           | <0.001                       | 0.029                             |
| A_21_P0010087    | XLOC_013531    | -0,48                                                                    | -0,74                                         | -0,22                                           | 0.012                        | 0.237                             |
| A_33_P3308774    |                | -0,47                                                                    | -0,60                                         | -0,35                                           | 0.003                        | 0.092                             |
| A_33_P3409854    | LHX1           | -0,47                                                                    | -0,34                                         | -0,61                                           | 0.046                        | 0.431                             |
| A_33_P3304533    | RNF207         | -0,47                                                                    | -0,41                                         | -0,53                                           | <0.001                       | 0.015                             |
| A_23_P70007      | HMMR           | -0,47                                                                    | -0,45                                         | -0,49                                           | 0.001                        | 0.051                             |
| A_32_P52785      | DAAM2          | -0,47                                                                    | -0,50                                         | -0,44                                           | 0.001                        | 0.046                             |
| A_21_P0012776    | XLOC_I2_011118 | -0,46                                                                    | -0,34                                         | -0,58                                           | 0.050                        | 0.446                             |
| A_32_P209624     | MKRN7P         | -0,46                                                                    | -0,17                                         | -0,76                                           | 0.010                        | 0.207                             |
| A_23_P4096       | CA4            | -0,46                                                                    | -0,46                                         | -0,47                                           | 0.012                        | 0.231                             |
| A_33_P3369317    | DNAJB5         | -0,46                                                                    | -0,42                                         | -0,50                                           | <0.001                       | 0.001                             |
| A_33_P3268507    | CEACAM1        | -0,46                                                                    | -0,50                                         | -0,42                                           | 0.001                        | 0.031                             |
| A_21_P0009846    | XLOC_013545    | -0,45                                                                    | -0,64                                         | -0,26                                           | 0.001                        | 0.061                             |
| A_23_P210465     | PI3            | -0,45                                                                    | -0,62                                         | -0,29                                           | 0.005                        | 0.143                             |
| A_33_P3217490    | LOC729444      | -0,45                                                                    | -0,24                                         | -0,66                                           | 0.047                        | 0.434                             |
| A_33_P3342569    |                | -0,45                                                                    | -0,24                                         | -0,65                                           | 0.001                        | 0.032                             |
| A_33_P3411279    | CYP21A2        | -0,45                                                                    | -0,08                                         | -0,82                                           | 0.007                        | 0.171                             |
| A_24_P291231     | PER3           | -0,44                                                                    | -0,42                                         | -0,47                                           | <0.001                       | 0.004                             |
| A_33_P3267150    |                | -0,44                                                                    | -0,41                                         | -0,47                                           | 0.025                        | 0.330                             |
| A_21_P0002056    | XLOC_002122    | -0,44                                                                    | -0,40                                         | -0,48                                           | 0.003                        | 0.106                             |
| A_32_P776626     | RGPD1          | -0,44                                                                    | -0,49                                         | -0,39                                           | <0.001                       | 0.018                             |

|               |                |       |       |       |        |        |
|---------------|----------------|-------|-------|-------|--------|--------|
| A_33_P3210278 | SYNE2          | -0,44 | -0,48 | -0,39 | 0.003  | 0.095  |
| A_33_P3346688 | HSPA8          | -0,43 | -0,50 | -0,37 | <0.001 | 0.029  |
| A_33_P3395028 | LOC152225      | -0,43 | -0,51 | -0,35 | <0.001 | 0.005  |
| A_23_P415015  | ATL2           | -0,43 | -0,27 | -0,59 | 0.002  | 0.078  |
| A_21_P0002531 | XLOC_002452    | -0,43 | -0,19 | -0,66 | 0.002  | 0.077  |
| A_23_P351148  | SH2D1B         | -0,43 | -0,48 | -0,38 | <0.001 | 0.001  |
| A_33_P3282213 |                | -0,42 | -0,11 | -0,73 | 0.004  | 0.117  |
| A_23_P7684    | CCNJL          | -0,42 | -0,42 | -0,43 | 0.013  | 0.239  |
| A_23_P159237  | GPR20          | -0,42 | -0,52 | -0,32 | <0.001 | <0.001 |
| A_24_P352952  | FAM20A         | -0,42 | -0,60 | -0,24 | 0.011  | 0.214  |
| A_24_P33895   | ATF3           | -0,42 | -0,52 | -0,32 | 0.001  | 0.063  |
| A_33_P3323463 | HSPA8          | -0,42 | -0,46 | -0,38 | <0.001 | <0.001 |
| A_33_P3373165 | DUX4L4         | -0,42 | -0,31 | -0,52 | 0.010  | 0.208  |
| A_32_P119248  | FOXD4          | -0,42 | -0,39 | -0,44 | <0.001 | 0.002  |
| A_32_P170547  | CT45A5         | -0,42 | -0,51 | -0,33 | 0.003  | 0.112  |
| A_23_P501007  | EFEMP1         | -0,41 | -0,58 | -0,25 | 0.049  | 0.441  |
| A_23_P37068   | TRAF3          | -0,41 | -0,39 | -0,44 | 0.004  | 0.124  |
| A_33_P3245120 | LOC200772      | -0,41 | -0,41 | -0,42 | <0.001 | 0.001  |
| A_21_P0008982 | XLOC_011806    | -0,41 | -0,28 | -0,55 | 0.001  | 0.045  |
| A_33_P3526458 | LOC338579      | -0,41 | -0,13 | -0,69 | 0.002  | 0.067  |
| A_21_P0005776 | XLOC_006948    | -0,41 | -0,50 | -0,32 | <0.001 | 0.001  |
| A_23_P338479  | CD274          | -0,41 | -0,53 | -0,28 | 0.001  | 0.055  |
| A_33_P3351285 |                | -0,40 | -0,74 | -0,06 | 0.009  | 0.202  |
| A_33_P3419621 | LOC100289580   | -0,40 | -0,48 | -0,31 | 0.008  | 0.186  |
| A_21_P0014063 | LOC100506546   | -0,40 | -0,30 | -0,49 | 0.019  | 0.293  |
| A_21_P0010759 | XLOC_I2_000920 | -0,39 | -0,26 | -0,53 | 0.006  | 0.151  |
| A_23_P94186   | LYPD2          | -0,39 | -0,34 | -0,45 | 0.006  | 0.155  |
| A_21_P0011288 | RERE           | -0,39 | -0,42 | -0,37 | <0.001 | 0.009  |
| A_21_P0001768 | LOC200772      | -0,39 | -0,43 | -0,35 | <0.001 | 0.003  |
| A_33_P3210418 | SLC5A10        | -0,39 | -0,45 | -0,33 | 0.005  | 0.135  |
| A_33_P3209005 | ZNF673         | -0,38 | -0,47 | -0,30 | 0.005  | 0.138  |
| A_24_P80776   | C6orf228       | -0,38 | -0,34 | -0,43 | <0.001 | 0.014  |
| A_21_P0009957 | XLOC_013531    | -0,38 | -0,36 | -0,41 | 0.009  | 0.202  |
| A_21_P0004400 | XLOC_004839    | -0,38 | -0,33 | -0,44 | <0.001 | 0.001  |
| A_24_P703462  |                | -0,38 | -0,42 | -0,34 | <0.001 | <0.001 |
| A_23_P348257  | NUAK1          | -0,38 | -0,23 | -0,53 | 0.022  | 0.316  |
| A_21_P0007907 | LOC100506622   | -0,38 | -0,27 | -0,49 | 0.008  | 0.181  |
| A_21_P0010184 | XLOC_014020    | -0,38 | -0,53 | -0,23 | 0.030  | 0.364  |
| A_24_P51375   |                | -0,38 | -0,45 | -0,31 | <0.001 | 0.005  |
| A_23_P30983   | GJB7           | -0,38 | -0,43 | -0,32 | 0.007  | 0.177  |
| A_33_P3400828 | NXNL2          | -0,38 | -0,34 | -0,41 | 0.003  | 0.099  |
| A_24_P13715   | FBXO22         | -0,38 | -0,23 | -0,52 | 0.005  | 0.141  |
| A_23_P206293  | GPR114         | -0,38 | -0,18 | -0,57 | 0.004  | 0.112  |
| A_21_P0008613 | XLOC_011213    | -0,37 | -0,21 | -0,54 | 0.003  | 0.097  |
| A_33_P3258546 | PCDHA5         | -0,37 | -0,42 | -0,33 | 0.024  | 0.328  |
| A_32_P135243  | MTHFD1L        | -0,37 | -0,08 | -0,67 | <0.001 | 0.027  |
| A_33_P3367717 | USP17          | -0,37 | -0,23 | -0,51 | 0.001  | 0.059  |

|               |                |       |       |       |        |        |
|---------------|----------------|-------|-------|-------|--------|--------|
| A_21_P0013436 | XLOC_I2_013873 | -0,37 | -0,37 | -0,37 | 0.003  | 0.101  |
| A_23_P212258  | KNG1           | -0,37 | -0,27 | -0,46 | 0.004  | 0.124  |
| A_21_P0011259 | XLOC_I2_004317 | -0,37 | -0,64 | -0,10 | 0.015  | 0.261  |
| A_21_P0004130 | XLOC_004832    | -0,37 | -0,45 | -0,29 | 0.002  | 0.071  |
| A_23_P94338   | ENPP2          | -0,36 | -0,41 | -0,32 | 0.001  | 0.031  |
| A_33_P3353372 |                | -0,36 | -0,33 | -0,39 | 0.003  | 0.094  |
| A_19_P0080261 |                |       |       |       |        |        |
| 5             | LOC100131564   | -0,36 | -0,19 | -0,54 | 0.006  | 0.163  |
| A_33_P3718269 |                | -0,36 | -0,36 | -0,36 | <0.001 | <0.001 |
| A_33_P3311543 |                | -0,36 | -0,24 | -0,48 | 0.013  | 0.244  |
| A_33_P3876591 | SNORA76        | -0,36 | -0,58 | -0,14 | 0.017  | 0.276  |
| A_33_P3247320 | EMR4P          | -0,36 | -0,44 | -0,28 | <0.001 | 0.020  |
| A_33_P3222852 |                | -0,36 | -0,45 | -0,27 | 0.011  | 0.215  |
| A_33_P3806676 |                | -0,36 | -0,62 | -0,10 | 0.036  | 0.388  |
| A_21_P0009011 | XLOC_011880    | -0,36 | -0,40 | -0,32 | 0.003  | 0.107  |
| A_19_P0032447 |                |       |       |       |        |        |
| 0             | MIR143HG       | -0,36 | -0,48 | -0,23 | 0.019  | 0.292  |
| A_33_P3322594 | MAGEB17        | -0,36 | -0,15 | -0,56 | 0.006  | 0.157  |
| A_21_P0001255 | XLOC_000022    | -0,36 | -0,50 | -0,22 | 0.049  | 0.444  |
| A_33_P3380913 |                | -0,35 | -0,42 | -0,28 | 0.026  | 0.338  |
| A_33_P3389018 | OR4F15         | -0,35 | -0,37 | -0,33 | 0.003  | 0.100  |
| A_21_P0003351 | XLOC_003509    | -0,35 | -0,23 | -0,48 | 0.001  | 0.052  |
| A_21_P0006275 | XLOC_007726    | -0,35 | -0,27 | -0,44 | 0.007  | 0.171  |
| A_33_P3284009 | GNN            | -0,35 | -0,38 | -0,33 | <0.001 | 0.018  |
| A_23_P125618  | GABRA3         | -0,35 | -0,43 | -0,28 | 0.017  | 0.276  |
| A_21_P0007009 | XLOC_008895    | -0,35 | -0,42 | -0,29 | 0.023  | 0.320  |
| A_21_P0001004 | XLOC_000357    | -0,35 | -0,39 | -0,31 | 0.001  | 0.044  |
| A_23_P205370  | ASB2           | -0,35 | -0,39 | -0,31 | <0.001 | <0.001 |
| A_23_P92672   | OCLN           | -0,35 | -0,35 | -0,35 | 0.002  | 0.082  |
| A_23_P425116  | SPAG11B        | -0,35 | -0,45 | -0,25 | 0.029  | 0.355  |
| A_33_P3322460 |                | -0,35 | -0,25 | -0,44 | 0.024  | 0.326  |
| A_33_P3218504 | LOC100128869   | -0,35 | -0,28 | -0,41 | 0.008  | 0.182  |
| A_23_P206920  | MYH11          | -0,35 | -0,30 | -0,39 | 0.003  | 0.094  |
| A_33_P3411392 | LINC00028      | -0,35 | -0,35 | -0,34 | 0.021  | 0.304  |
| A_33_P3234984 | IFT81          | -0,35 | -0,12 | -0,57 | 0.006  | 0.164  |
| A_32_P100683  | TTC28          | -0,35 | -0,49 | -0,21 | 0.002  | 0.065  |
| A_23_P421401  | PDGFRB         | -0,34 | -0,29 | -0,40 | 0.007  | 0.165  |
| A_24_P48495   | LYPD3          | -0,34 | -0,40 | -0,29 | 0.016  | 0.270  |
| A_21_P0006781 | LOC100507633   | -0,34 | -0,22 | -0,46 | 0.006  | 0.163  |
| A_33_P3263994 |                | -0,34 | -0,28 | -0,41 | 0.043  | 0.418  |
| A_24_P235049  | MTHFD1L        | -0,34 | -0,28 | -0,40 | 0.007  | 0.168  |
| A_23_P140760  | GPR97          | -0,34 | -0,41 | -0,27 | 0.014  | 0.253  |
| A_33_P3376131 | NT5DC4         | -0,34 | -0,35 | -0,33 | 0.010  | 0.213  |
| A_33_P3319401 | ARHGAP21       | -0,34 | -0,24 | -0,44 | 0.003  | 0.100  |
| A_23_P64721   | HCAR3          | -0,34 | -0,43 | -0,25 | <0.001 | 0.023  |
| A_23_P7412    | BTNL8          | -0,34 | -0,33 | -0,35 | 0.043  | 0.419  |
| A_21_P0003706 | MGC39584       | -0,34 | -0,28 | -0,40 | 0.030  | 0.362  |
| A_33_P3407540 | TRAPPC2        | -0,34 | -0,34 | -0,34 | 0.003  | 0.099  |

|               |                |       |       |       |        |       |
|---------------|----------------|-------|-------|-------|--------|-------|
| A_23_P114740  | CFH            | -0,34 | -0,43 | -0,25 | 0.015  | 0.256 |
| A_21_P0005990 | XLOC_007438    | -0,34 | -0,41 | -0,26 | 0.028  | 0.346 |
| A_33_P3415888 | TEPP           | -0,34 | -0,25 | -0,43 | 0.006  | 0.150 |
| A_21_P0011392 | REREP3         | -0,34 | -0,39 | -0,29 | <0.001 | 0.001 |
| A_21_P0005269 | XLOC_006304    | -0,34 | -0,45 | -0,23 | 0.023  | 0.321 |
| A_21_P0002956 | XLOC_002636    | -0,34 | -0,48 | -0,20 | 0.003  | 0.100 |
| A_21_P0012036 | XLOC_I2_007706 | -0,34 | -0,35 | -0,32 | 0.017  | 0.273 |
| A_33_P3366028 | C2orf118       | -0,34 | -0,36 | -0,32 | 0.009  | 0.203 |
| A_33_P3272105 | FLJ38576       | -0,34 | -0,45 | -0,23 | 0.033  | 0.376 |
| A_21_P0007569 | XLOC_009781    | -0,34 | -0,29 | -0,38 | 0.014  | 0.250 |
| A_21_P0001908 | DDX18          | -0,33 | -0,47 | -0,19 | 0.035  | 0.386 |
| A_21_P0012443 | XLOC_I2_010226 | -0,33 | -0,62 | -0,05 | 0.015  | 0.261 |
| A_21_P0014409 | LOC100506553   | -0,33 | -0,36 | -0,31 | 0.018  | 0.284 |
| A_19_P0031909 |                |       |       |       |        |       |
| 3             | XLOC_010204    | -0,33 | -0,22 | -0,44 | 0.004  | 0.132 |
| A_21_P0009743 | XLOC_013263    | -0,33 | -0,36 | -0,30 | 0.018  | 0.287 |
| A_21_P0014510 | LOC645321      | -0,33 | 0,07  | -0,73 | 0.023  | 0.321 |
| A_24_P237270  | ADORA2A        | -0,33 | -0,33 | -0,33 | <0.001 | 0.005 |
| A_33_P3358844 |                | -0,33 | -0,27 | -0,39 | 0.020  | 0.295 |
| A_33_P3370060 | ARHGAP23       | -0,33 | -0,18 | -0,48 | 0.033  | 0.376 |
| A_21_P0006664 | XLOC_008436    | -0,33 | -0,40 | -0,26 | 0.027  | 0.342 |
| A_23_P416305  | RPL27A         | -0,33 | -0,32 | -0,33 | 0.014  | 0.251 |
| A_21_P0004641 | MUC22          | -0,33 | -0,25 | -0,40 | 0.014  | 0.247 |
| A_21_P0001471 | XLOC_000721    | -0,33 | -0,25 | -0,40 | 0.009  | 0.203 |
| A_33_P3368920 |                | -0,33 | -0,30 | -0,35 | 0.028  | 0.349 |
| A_24_P389285  | C7orf54        | -0,33 | -0,24 | -0,41 | 0.008  | 0.184 |
| A_33_P3368208 | ABRA           | -0,33 | -0,44 | -0,21 | 0.023  | 0.320 |
| A_33_P3691168 | IL31RA         | -0,33 | -0,35 | -0,30 | <0.001 | 0.010 |
| A_21_P0008666 | XLOC_011338    | -0,33 | -0,52 | -0,13 | 0.021  | 0.306 |
| A_23_P329924  | HCAR2          | -0,32 | -0,38 | -0,27 | 0.005  | 0.141 |
| A_33_P3213311 |                | -0,32 | 0,04  | -0,69 | 0.039  | 0.403 |
| A_23_P160336  | LEFTY1         | -0,32 | -0,28 | -0,36 | 0.016  | 0.264 |
| A_23_P139912  | IGFBP6         | -0,32 | -0,28 | -0,36 | 0.017  | 0.276 |
| A_21_P0007851 | XLOC_009879    | -0,32 | -0,41 | -0,23 | 0.043  | 0.421 |
| A_33_P3259736 | AMACR          | -0,32 | -0,22 | -0,43 | 0.016  | 0.266 |
| A_21_P0006890 | XLOC_008549    | -0,32 | -0,25 | -0,39 | 0.004  | 0.117 |
| A_23_P25674   | CKB            | -0,32 | -0,39 | -0,25 | <0.001 | 0.001 |
| A_21_P0004337 | XLOC_004637    | -0,32 | -0,04 | -0,59 | 0.042  | 0.413 |
| A_23_P314101  | SUSD2          | -0,32 | -0,37 | -0,27 | 0.002  | 0.083 |
| A_33_P3406245 | TAF1A          | -0,32 | -0,36 | -0,27 | <0.001 | 0.003 |
| A_23_P153616  | MADCAM1        | -0,32 | -0,51 | -0,13 | 0.028  | 0.352 |
| A_33_P3287058 |                | -0,32 | -0,24 | -0,39 | 0.043  | 0.418 |
| A_23_P66767   | GGT6           | -0,32 | -0,26 | -0,38 | 0.046  | 0.432 |
| A_33_P3629151 | CDRT8          | -0,32 | -0,64 | 0,01  | 0.050  | 0.447 |
| A_23_P37088   | RDH12          | -0,32 | -0,32 | -0,32 | 0.010  | 0.208 |
| A_21_P0006380 | XLOC_007745    | -0,32 | -0,50 | -0,14 | 0.027  | 0.344 |
| A_23_P137665  | CHI3L1         | -0,32 | -0,41 | -0,23 | 0.044  | 0.422 |

|               |                |       |       |       |        |        |
|---------------|----------------|-------|-------|-------|--------|--------|
| A_33_P3307490 | SYNRG          | -0,32 | -0,47 | -0,17 | 0.009  | 0.203  |
| A_23_P88909   | SYNGR3         | -0,32 | -0,28 | -0,35 | 0.014  | 0.252  |
| A_21_P0007880 | LOC100507195   | -0,32 | -0,14 | -0,50 | 0.023  | 0.319  |
| A_33_P3352632 | LOC728147      | -0,32 | -0,28 | -0,35 | <0.001 | <0.001 |
| A_21_P0002213 | XLOC_001465    | -0,32 | -0,30 | -0,33 | 0.034  | 0.380  |
| A_33_P3264965 |                | -0,32 | -0,35 | -0,28 | 0.012  | 0.230  |
| A_32_P133767  | C12orf42       | -0,32 | -0,36 | -0,27 | 0.033  | 0.379  |
| A_23_P132378  | CELSR1         | -0,31 | -0,44 | -0,19 | 0.015  | 0.262  |
| A_21_P0005028 | XLOC_005731    | -0,31 | -0,20 | -0,43 | 0.004  | 0.126  |
| A_21_P0008657 | XLOC_011317    | -0,31 | -0,35 | -0,27 | 0.046  | 0.430  |
| A_23_P103775  | LRRC8C         | -0,31 | -0,31 | -0,32 | <0.001 | <0.001 |
| A_33_P3382276 | ST6GAL1        | -0,31 | -0,23 | -0,39 | 0.013  | 0.239  |
| A_33_P3363173 |                | -0,31 | -0,44 | -0,19 | 0.029  | 0.356  |
| A_24_P115932  | PTGDR2         | -0,31 | -0,41 | -0,22 | 0.004  | 0.121  |
| A_33_P3256425 | BICD1          | -0,31 | -0,24 | -0,38 | 0.001  | 0.055  |
| A_21_P0008790 | XLOC_011592    | -0,31 | -0,47 | -0,15 | 0.020  | 0.300  |
| A_23_P65041   | RACGAP1P       | -0,31 | -0,47 | -0,15 | 0.003  | 0.102  |
| A_33_P3366048 | C20orf112      | -0,31 | -0,39 | -0,23 | 0.049  | 0.444  |
| A_33_P3341424 | MYO10          | -0,31 | -0,29 | -0,33 | <0.001 | 0.019  |
| A_33_P3370094 | MME            | -0,31 | -0,36 | -0,26 | 0.014  | 0.247  |
| A_24_P548866  | HIGD1A         | -0,31 | -0,14 | -0,48 | 0.028  | 0.352  |
| A_33_P3289456 |                | -0,31 | -0,30 | -0,32 | 0.025  | 0.331  |
| A_33_P3356070 | LPIN1          | -0,31 | -0,30 | -0,32 | 0.034  | 0.381  |
| A_21_P0014580 | LOC100507195   | -0,31 | -0,32 | -0,29 | 0.030  | 0.360  |
| A_21_P0008496 | XLOC_011147    | -0,31 | -0,24 | -0,38 | 0.003  | 0.095  |
| A_23_P328022  | SLC5A10        | -0,31 | -0,35 | -0,26 | <0.001 | 0.028  |
| A_33_P3314813 | C11orf94       | -0,31 | -0,42 | -0,19 | 0.001  | 0.035  |
| A_21_P0006678 | LOC100506853   | -0,31 | -0,36 | -0,25 | 0.035  | 0.383  |
| A_33_P3275233 | LOC100131792   | -0,31 | -0,39 | -0,22 | 0.003  | 0.108  |
| A_33_P3324904 |                | -0,31 | -0,33 | -0,28 | 0.008  | 0.186  |
| A_33_P3337277 | LOC100129846   | -0,31 | -0,08 | -0,53 | 0.023  | 0.320  |
| A_33_P3289621 | LOC283143      | -0,31 | -0,29 | -0,32 | 0.015  | 0.258  |
| A_24_P82155   | ANKDD1A        | -0,30 | -0,31 | -0,30 | 0.017  | 0.275  |
| A_21_P0011320 | XLOC_I2_004640 | -0,30 | -0,48 | -0,12 | 0.018  | 0.285  |
| A_33_P3416206 | ARHGAP17       | -0,30 | -0,35 | -0,26 | <0.001 | <0.001 |
| A_33_P3373598 | TREML2P1       | -0,30 | -0,38 | -0,22 | 0.010  | 0.214  |
| A_23_P352619  | TIFA           | -0,30 | -0,38 | -0,22 | 0.018  | 0.283  |
| A_33_P3304538 | RNF207         | -0,30 | -0,32 | -0,28 | <0.001 | 0.007  |
| A_33_P3287472 | PPP1R27        | -0,30 | -0,14 | -0,46 | 0.011  | 0.217  |
| A_33_P3531204 | C1QTNF9B-AS1   | -0,30 | -0,24 | -0,36 | 0.015  | 0.262  |
| A_24_P811704  | PPFIBP1        | -0,30 | -0,33 | -0,27 | 0.007  | 0.167  |
| A_33_P3256793 | KIAA1324       | -0,30 | -0,34 | -0,26 | 0.011  | 0.221  |
| A_33_P3336113 | TIGD3          | -0,30 | -0,31 | -0,28 | <0.001 | <0.001 |
| A_21_P0000900 | LOC100505678   | -0,30 | -0,24 | -0,35 | 0.014  | 0.251  |
| A_23_P69326   | CADPS          | -0,30 | -0,30 | -0,29 | 0.018  | 0.281  |
| A_21_P0010297 | XLOC_014111    | -0,30 | -0,17 | -0,42 | 0.001  | 0.053  |
| A_23_P130815  | KIR2DS2        | -0,30 | -0,36 | -0,23 | 0.019  | 0.292  |

|               |                |       |       |       |        |        |
|---------------|----------------|-------|-------|-------|--------|--------|
| A_23_P216307  | RUNX1T1        | -0,30 | -0,32 | -0,27 | 0.049  | 0.440  |
| A_23_P256965  | C8orf12        | -0,30 | -0,25 | -0,34 | 0.016  | 0.271  |
| A_23_P214360  | IRF4           | -0,30 | -0,23 | -0,37 | <0.001 | 0.001  |
| A_21_P0000319 | SNORA29        | -0,29 | -0,12 | -0,47 | 0.003  | 0.092  |
| A_21_P0006234 | XLOC_007591    | -0,29 | -0,13 | -0,46 | 0.008  | 0.183  |
| A_23_P70794   | RAB23          | -0,29 | -0,20 | -0,39 | 0.025  | 0.333  |
| A_33_P3415430 | HSPA1B         | -0,29 | -0,33 | -0,26 | <0.001 | <0.001 |
| A_24_P706340  | FAM155A        | -0,29 | -0,24 | -0,35 | 0.027  | 0.341  |
| A_21_P0005590 | XLOC_006319    | -0,29 | -0,28 | -0,31 | 0.025  | 0.333  |
| A_33_P3237664 | HDAC7          | -0,29 | -0,28 | -0,31 | <0.001 | <0.001 |
| A_21_P0006012 | XLOC_007370    | -0,29 | -0,24 | -0,35 | 0.020  | 0.296  |
| A_33_P3315263 | KRT79          | -0,29 | -0,26 | -0,32 | 0.026  | 0.337  |
| A_24_P354724  | TAGAP          | -0,29 | -0,27 | -0,32 | <0.001 | <0.001 |
| A_33_P3285018 |                | -0,29 | -0,20 | -0,38 | 0.018  | 0.286  |
| A_21_P0000005 | SMTNL1         | -0,29 | -0,26 | -0,32 | 0.044  | 0.421  |
| A_21_P0008465 | XLOC_011081    | -0,29 | -0,41 | -0,17 | 0.003  | 0.110  |
| A_23_P214300  | GSTA2          | -0,29 | -0,27 | -0,31 | 0.022  | 0.315  |
| A_33_P3337500 |                | -0,29 | -0,12 | -0,46 | 0.049  | 0.442  |
| A_21_P0001593 | XLOC_001072    | -0,29 | -0,47 | -0,11 | 0.040  | 0.408  |
| A_33_P3212456 | STX1A          | -0,29 | -0,29 | -0,29 | 0.041  | 0.412  |
| A_21_P0004343 | XLOC_004657    | -0,29 | -0,24 | -0,34 | 0.014  | 0.254  |
| A_21_P0011896 | XLOC_I2_007834 | -0,29 | -0,16 | -0,42 | 0.019  | 0.293  |
| A_21_P0005549 | XLOC_006669    | -0,29 | -0,22 | -0,36 | 0.015  | 0.258  |
| A_23_P143526  | S100B          | -0,29 | -0,36 | -0,21 | 0.021  | 0.304  |
| A_21_P0000486 | SNORD103A      | -0,29 | -0,25 | -0,33 | <0.001 | 0.021  |
| A_24_P382319  | CEACAM1        | -0,29 | -0,29 | -0,28 | 0.002  | 0.089  |
| A_21_P0010839 | XLOC_I2_001683 | -0,29 | -0,24 | -0,34 | 0.025  | 0.330  |
| A_33_P3242793 | C1orf81        | -0,29 | -0,18 | -0,39 | 0.010  | 0.209  |
| A_24_P10137   | C13orf15       | -0,29 | -0,36 | -0,21 | <0.001 | 0.004  |
| A_23_P129856  | HIC1           | -0,29 | -0,42 | -0,15 | 0.028  | 0.351  |
| A_33_P3358863 |                | -0,29 | -0,47 | -0,10 | 0.043  | 0.418  |
| A_23_P95060   | EPHB3          | -0,29 | -0,35 | -0,23 | <0.001 | <0.001 |
| A_21_P0011964 | XLOC_I2_008259 | -0,29 | -0,08 | -0,49 | 0.021  | 0.307  |
| A_33_P3230048 | LOC647020      | -0,29 | -0,24 | -0,33 | 0.042  | 0.415  |
| A_21_P0000311 | SNORA14A       | -0,29 | -0,36 | -0,21 | <0.001 | <0.001 |
| A_23_P213102  | PALLD          | -0,29 | -0,26 | -0,31 | <0.001 | 0.003  |
| A_21_P0007284 | XLOC_009302    | -0,28 | -0,31 | -0,26 | <0.001 | 0.012  |
| A_33_P3307887 | LOC100128653   | -0,28 | -0,25 | -0,32 | 0.017  | 0.275  |
| A_33_P3256844 | WDR49          | -0,28 | -0,03 | -0,54 | 0.005  | 0.142  |
| A_23_P423695  | MXD4           | -0,28 | -0,48 | -0,09 | 0.032  | 0.373  |
| A_21_P0009701 | XLOC_013027    | -0,28 | -0,39 | -0,18 | 0.019  | 0.294  |
| A_33_P3334948 |                | -0,28 | -0,31 | -0,26 | 0.021  | 0.306  |
| A_33_P3327504 | OR51V1         | -0,28 | -0,31 | -0,26 | 0.034  | 0.381  |
| A_33_P3221432 | ZNF284         | -0,28 | -0,18 | -0,39 | 0.004  | 0.126  |
| A_23_P53891   | KLF5           | -0,28 | -0,24 | -0,32 | 0.010  | 0.209  |
| A_19_P0032141 |                |       |       |       |        |        |
| 4             | LOC285419      | -0,28 | -0,23 | -0,34 | 0.025  | 0.333  |

|               |                |       |       |       |        |        |
|---------------|----------------|-------|-------|-------|--------|--------|
| A_33_P3285391 |                | -0,28 | -0,27 | -0,30 | 0.042  | 0.416  |
| A_33_P3399864 | ZNF792         | -0,28 | -0,18 | -0,38 | 0.001  | 0.044  |
| A_33_P3382629 |                | -0,28 | -0,25 | -0,31 | 0.035  | 0.387  |
| A_33_P3299309 | RPL28          | -0,28 | -0,17 | -0,40 | 0.006  | 0.163  |
| A_23_P130585  | CIB3           | -0,28 | -0,28 | -0,28 | 0.004  | 0.126  |
| A_33_P3313532 | ANKRD20A1      | -0,28 | -0,61 | 0,04  | 0.025  | 0.329  |
| A_21_P0014815 | LOC646778      | -0,28 | -0,02 | -0,54 | 0.018  | 0.287  |
| A_32_P148275  | SPIC           | -0,28 | -0,38 | -0,18 | 0.046  | 0.433  |
| A_33_P3311245 | KRTAP19-7      | -0,28 | -0,19 | -0,37 | 0.022  | 0.310  |
| A_21_P0013669 | XLOC_I2_015288 | -0,28 | -0,22 | -0,34 | 0.041  | 0.410  |
| A_21_P0008383 | XLOC_010922    | -0,28 | -0,25 | -0,31 | 0.038  | 0.401  |
| A_19_P0080913 |                |       |       |       |        |        |
| 9             |                | -0,28 | -0,09 | -0,46 | 0.045  | 0.426  |
| A_21_P0005152 | XLOC_005575    | -0,28 | -0,31 | -0,25 | 0.014  | 0.255  |
| A_33_P3221384 |                | -0,28 | -0,29 | -0,26 | 0.033  | 0.378  |
| A_21_P0011438 | XLOC_I2_005198 | -0,28 | -0,06 | -0,49 | 0.032  | 0.370  |
| A_33_P3362178 | PROX2          | -0,28 | -0,27 | -0,28 | 0.035  | 0.386  |
| A_33_P3240966 |                | -0,28 | -0,24 | -0,31 | 0.026  | 0.338  |
| A_24_P418536  |                | -0,28 | -0,40 | -0,16 | 0.050  | 0.446  |
| A_24_P260101  | MME            | -0,28 | -0,29 | -0,26 | 0.017  | 0.279  |
| A_21_P0007310 | MRPL23-AS1     | -0,28 | -0,08 | -0,47 | 0.040  | 0.408  |
| A_24_P331150  | CYP4F22        | -0,28 | -0,24 | -0,31 | 0.019  | 0.293  |
| A_33_P3275495 | LOC400743      | -0,27 | -0,27 | -0,28 | 0.012  | 0.231  |
| A_33_P3412603 |                | -0,27 | -0,40 | -0,15 | 0.001  | 0.047  |
| A_33_P3406962 | GATA4          | -0,27 | -0,29 | -0,26 | 0.020  | 0.299  |
| A_21_P0014217 | LOC100507278   | -0,27 | -0,38 | -0,17 | 0.030  | 0.361  |
| A_33_P3333712 | SCYL2          | -0,27 | -0,28 | -0,27 | 0.001  | 0.036  |
| A_21_P0013644 | XLOC_I2_015205 | -0,27 | -0,37 | -0,18 | 0.022  | 0.310  |
| A_21_P0011043 | XLOC_I2_002928 | -0,27 | -0,28 | -0,26 | 0.027  | 0.345  |
| A_33_P3232677 |                | -0,27 | -0,35 | -0,20 | 0.037  | 0.395  |
| A_33_P3364741 | MRC2           | -0,27 | -0,34 | -0,21 | 0.010  | 0.206  |
| A_32_P213330  | RGNEF          | -0,27 | -0,50 | -0,04 | 0.036  | 0.391  |
| A_21_P0000112 | ZNF726         | -0,27 | -0,25 | -0,29 | 0.017  | 0.275  |
| A_21_P0013837 | XLOC_I2_015855 | -0,27 | -0,28 | -0,26 | 0.007  | 0.174  |
| A_33_P3342628 | HES4           | -0,27 | -0,33 | -0,21 | 0.001  | 0.030  |
| A_33_P3354176 | MYOF           | -0,27 | -0,39 | -0,15 | <0.001 | 0.012  |
| A_21_P0006583 | XLOC_008223    | -0,27 | -0,20 | -0,34 | 0.030  | 0.364  |
| A_32_P46594   | LOC145837      | -0,27 | -0,28 | -0,26 | 0.036  | 0.390  |
| A_33_P3357332 |                | -0,27 | -0,47 | -0,06 | 0.010  | 0.206  |
| A_23_P143845  | TIPARP         | -0,27 | -0,25 | -0,29 | <0.001 | <0.001 |
| A_21_P0006413 | LOC100133123   | -0,27 | -0,29 | -0,25 | 0.039  | 0.406  |
| A_33_P3423979 | PALLD          | -0,27 | -0,32 | -0,22 | <0.001 | 0.009  |
| A_21_P0013881 | XLOC_I2_015893 | -0,27 | -0,13 | -0,41 | 0.011  | 0.221  |
| A_21_P0000316 | SNORA20        | -0,27 | -0,27 | -0,27 | <0.001 | <0.001 |
| A_33_P3365047 | RBBP9          | -0,27 | -0,19 | -0,35 | 0.002  | 0.079  |
| A_33_P3272744 | RHBG           | -0,27 | -0,23 | -0,30 | 0.008  | 0.184  |
| A_23_P151895  | CILP           | -0,27 | -0,32 | -0,21 | 0.032  | 0.371  |

|               |              |       |       |       |        |        |
|---------------|--------------|-------|-------|-------|--------|--------|
| A_33_P3402103 | C1orf201     | -0,27 | -0,38 | -0,15 | 0.024  | 0.328  |
| A_21_P0008228 | LINC00442    | -0,27 | -0,37 | -0,16 | 0.044  | 0.421  |
| A_33_P3212804 | C22orf42     | -0,27 | -0,37 | -0,16 | 0.038  | 0.397  |
| A_21_P0009706 | XLOC_013036  | -0,27 | -0,45 | -0,09 | 0.022  | 0.315  |
| A_21_P0014913 | LINC00458    | -0,27 | -0,12 | -0,42 | 0.045  | 0.429  |
| A_33_P3215232 |              | -0,27 | -0,19 | -0,34 | 0.021  | 0.307  |
| A_33_P3318327 | FLJ31713     | -0,27 | -0,34 | -0,19 | 0.032  | 0.372  |
| A_33_P3338071 |              | -0,27 | -0,31 | -0,23 | 0.009  | 0.196  |
| A_21_P0008117 | XLOC_010496  | -0,27 | -0,28 | -0,25 | 0.001  | 0.047  |
| A_21_P0008965 | XLOC_011774  | -0,27 | -0,15 | -0,38 | 0.035  | 0.383  |
| A_21_P0011669 | CLEC4GP1     | -0,27 | -0,27 | -0,26 | 0.031  | 0.365  |
| A_33_P3314091 |              | -0,26 | -0,32 | -0,21 | <0.001 | 0.020  |
| A_23_P58770   | HAND1        | -0,26 | -0,32 | -0,21 | 0.036  | 0.389  |
| A_23_P167061  | PPEF2        | -0,26 | -0,18 | -0,35 | 0.033  | 0.377  |
| A_23_P16817   | CLK1         | -0,26 | -0,28 | -0,25 | <0.001 | <0.001 |
| A_33_P3255531 | LOC100129216 | -0,26 | -0,29 | -0,23 | 0.008  | 0.183  |
| A_33_P3211513 | CLK1         | -0,26 | -0,22 | -0,31 | <0.001 | <0.001 |
| A_33_P3279949 | LOC100128170 | -0,26 | -0,41 | -0,12 | 0.032  | 0.370  |
| A_21_P0000928 | LOC115110    | -0,26 | -0,27 | -0,26 | 0.003  | 0.110  |



## Supplemental Table 4

The table shows the transcripts which were up-regulated 180 minutes post-stress exposure compared to the pre-stress timepoint in both groups. It shows the differences in log<sub>2</sub> expression values (t<sub>2</sub>-t<sub>0</sub>) across both groups, and separately for the control group and the early adversity group. The *p*-values result from the limma *t*-test. The *p*-values were multiplicity-adjusted to control the false discovery rate (FDR) by the Benjamini–Hochberg procedure.

t<sub>0</sub>: 45 minutes pre-stress exposure; t<sub>2</sub>: 180 minutes post-stress exposure.

| Agilent Probe ID | Gene Symbol    | Mean expression change across both groups t <sub>1</sub> -t <sub>0</sub> (log <sub>2</sub> expression values) | Control Group (log <sub>2</sub> expression values t <sub>1</sub> -t <sub>0</sub> ) | Early Adversity (log <sub>2</sub> expression values t <sub>1</sub> -t <sub>0</sub> ) | <i>p</i> -value (main effect stress) | adj. <i>p</i> -value (main effect stress) |
|------------------|----------------|---------------------------------------------------------------------------------------------------------------|------------------------------------------------------------------------------------|--------------------------------------------------------------------------------------|--------------------------------------|-------------------------------------------|
| A_23_P259071     | AREG           | 2,67                                                                                                          | 2,71                                                                               | 2,69                                                                                 | <0.001                               | <0.001                                    |
| A_23_P398566     | NR4A3          | 2,50                                                                                                          | 2,33                                                                               | 2,74                                                                                 | <0.001                               | <0.001                                    |
| A_33_P3295203    | HAS1           | 2,44                                                                                                          | 2,33                                                                               | 2,74                                                                                 | <0.001                               | <0.001                                    |
| A_33_P3419190    | AREG           | 1,67                                                                                                          | 1,61                                                                               | 1,71                                                                                 | <0.001                               | <0.001                                    |
| A_23_P74609      | G0S2           | 1,48                                                                                                          | 1,36                                                                               | 1,60                                                                                 | <0.001                               | <0.001                                    |
| A_23_P121596     | PPBP           | 1,29                                                                                                          | 1,62                                                                               | 1,14                                                                                 | <0.001                               | 0.008                                     |
| A_23_P46936      | EGR2           | 1,27                                                                                                          | 1,20                                                                               | 1,39                                                                                 | <0.001                               | <0.001                                    |
| A_23_P214080     | EGR1           | 1,23                                                                                                          | 1,23                                                                               | 1,29                                                                                 | <0.001                               | <0.001                                    |
| A_24_P79403      | PF4            | 1,23                                                                                                          | 1,44                                                                               | 1,14                                                                                 | <0.001                               | 0.004                                     |
| A_23_P71037      | IL6            | 1,22                                                                                                          | 0,93                                                                               | 1,53                                                                                 | <0.001                               | <0.001                                    |
| A_33_P3272948    | C17orf107      | 0,87                                                                                                          | 0,92                                                                               | 0,89                                                                                 | <0.001                               | <0.001                                    |
| A_24_P262127     | RRAD           | 0,83                                                                                                          | 0,66                                                                               | 0,99                                                                                 | <0.001                               | <0.001                                    |
| A_33_P3295358    | ANGPTL4        | 0,80                                                                                                          | 0,73                                                                               | 0,86                                                                                 | <0.001                               | 0.004                                     |
| A_33_P3337272    | NRARP          | 0,79                                                                                                          | 0,69                                                                               | 0,87                                                                                 | <0.001                               | <0.001                                    |
| A_19_P00317910   | XLOC_I2_015034 | 0,79                                                                                                          | 0,84                                                                               | 0,75                                                                                 | <0.001                               | <0.001                                    |
| A_23_P87879      | CD69           | 0,78                                                                                                          | 0,73                                                                               | 0,93                                                                                 | <0.001                               | <0.001                                    |
| A_33_P3250165    | ERMN           | 0,75                                                                                                          | 0,60                                                                               | 0,87                                                                                 | <0.001                               | <0.001                                    |
| A_19_P00316415   | Q8LKN9         | 0,74                                                                                                          | 0,72                                                                               | 0,64                                                                                 | <0.001                               | <0.001                                    |
| A_23_P78037      | CCL7           | 0,74                                                                                                          | 0,72                                                                               | 0,83                                                                                 | <0.001                               | 0.001                                     |
| A_21_P0009488    | XLOC_012694    | 0,73                                                                                                          | 0,84                                                                               | 0,71                                                                                 | <0.001                               | <0.001                                    |
| A_24_P37409      | DUSP2          | 0,68                                                                                                          | 0,66                                                                               | 0,71                                                                                 | <0.001                               | <0.001                                    |
| A_23_P29257      | H1FO           | 0,67                                                                                                          | 0,59                                                                               | 0,62                                                                                 | <0.001                               | <0.001                                    |
| A_21_P0008786    | XLOC_011590    | 0,66                                                                                                          | 0,59                                                                               | 0,66                                                                                 | <0.001                               | <0.001                                    |
| A_33_P3395605    | TMEM119        | 0,65                                                                                                          | 0,62                                                                               | 0,71                                                                                 | <0.001                               | <0.001                                    |
| A_33_P3296181    | CCL3L3         | 0,64                                                                                                          | 0,59                                                                               | 0,67                                                                                 | <0.001                               | <0.001                                    |
| A_33_P3390057    | TM4SF1         | 0,62                                                                                                          | 0,32                                                                               | 1,03                                                                                 | 0.014                                | 0.128                                     |
| A_24_P183150     | CXCL3          | 0,62                                                                                                          | 0,76                                                                               | 0,51                                                                                 | <0.001                               | 0.009                                     |
| A_33_P3298810    | FFAR3          | 0,61                                                                                                          | 0,48                                                                               | 0,76                                                                                 | <0.001                               | 0.006                                     |
| A_23_P103110     | MAFF           | 0,61                                                                                                          | 0,57                                                                               | 0,68                                                                                 | <0.001                               | <0.001                                    |
| A_21_P0002920    | XLOC_003383    | 0,60                                                                                                          | 0,66                                                                               | 0,53                                                                                 | <0.001                               | <0.001                                    |
| A_33_P3241661    | LOC388780      | 0,60                                                                                                          | 0,70                                                                               | 0,51                                                                                 | <0.001                               | 0.001                                     |
| A_32_P154223     | LOC100505683   | 0,60                                                                                                          | 0,67                                                                               | 0,62                                                                                 | <0.001                               | <0.001                                    |
| A_23_P165840     | ODC1           | 0,60                                                                                                          | 0,56                                                                               | 0,53                                                                                 | <0.001                               | <0.001                                    |

|               |                |      |      |      |        |        |
|---------------|----------------|------|------|------|--------|--------|
| A_23_P122924  | INHBA          | 0,59 | 0,55 | 0,67 | <0.001 | <0.001 |
| A_23_P64792   | KCNMB4         | 0,58 | 0,50 | 0,64 | <0.001 | <0.001 |
| A_21_P0005249 | XLOC_006178    | 0,57 | 0,70 | 0,47 | <0.001 | <0.001 |
| A_23_P101905  | APC2           | 0,57 | 0,39 | 0,67 | <0.001 | 0.001  |
| A_23_P29124   | GP1BB          | 0,57 | 0,84 | 0,36 | 0.007  | 0.084  |
| A_23_P129717  | ERI2           | 0,57 | 0,53 | 0,43 | <0.001 | <0.001 |
| A_33_P3618561 | LOC730961      | 0,57 | 0,47 | 0,64 | <0.001 | 0.002  |
| A_21_P0007977 | XLOC_010543    | 0,56 | 0,70 | 0,34 | 0.001  | 0.014  |
| A_21_P0005260 | XLOC_006245    | 0,56 | 0,81 | 0,19 | <0.001 | 0.003  |
| A_33_P3353263 | CYB5RL         | 0,56 | 0,53 | 0,71 | <0.001 | <0.001 |
| A_33_P3351566 | ETNK1          | 0,56 | 0,46 | 0,75 | <0.001 | 0.001  |
| A_23_P150609  | IGF2           | 0,55 | 0,51 | 0,35 | 0.001  | 0.014  |
| A_33_P3737979 | SCARNA23       | 0,55 | 0,54 | 0,60 | 0.001  | 0.011  |
| A_33_P3263664 | KRTAP6-2       | 0,54 | 0,50 | 0,58 | <0.001 | <0.001 |
| A_23_P324327  | GPRC5B         | 0,54 | 0,40 | 0,60 | <0.001 | <0.001 |
| A_23_P320578  | RGS16          | 0,53 | 0,47 | 0,35 | <0.001 | 0.002  |
| A_21_P0005402 | XLOC_006178    | 0,53 | 0,47 | 0,50 | <0.001 | 0.004  |
| A_23_P416581  | GNAZ           | 0,53 | 0,71 | 0,32 | 0.021  | 0.173  |
| A_21_P0002169 | XLOC_001342    | 0,53 | 0,35 | 0,48 | <0.001 | 0.002  |
| A_23_P70670   | CD83           | 0,52 | 0,46 | 0,57 | <0.001 | <0.001 |
| A_32_P169179  | MSX2P1         | 0,52 | 0,46 | 0,61 | 0.001  | 0.012  |
| A_23_P146946  | CST6           | 0,52 | 0,69 | 0,34 | <0.001 | 0.005  |
| A_21_P0011102 | XLOC_I2_003419 | 0,51 | 0,51 | 0,54 | 0.002  | 0.026  |
| A_33_P3290089 | LOC100505585   | 0,51 | 0,76 | 0,42 | <0.001 | 0.002  |
| A_23_P136347  | EPS8           | 0,51 | 0,39 | 0,65 | <0.001 | <0.001 |
| A_23_P121657  | HS3ST1         | 0,51 | 0,59 | 0,32 | <0.001 | <0.001 |
| A_33_P3212804 | C22orf42       | 0,50 | 0,46 | 0,54 | <0.001 | 0.001  |
| A_23_P40453   | CBR3           | 0,50 | 0,64 | 0,40 | <0.001 | 0.009  |
| A_33_P3395688 | MYZAP          | 0,50 | 0,60 | 0,16 | 0.037  | 0.246  |
| A_21_P0011420 | XLOC_I2_005150 | 0,50 | 0,21 | 0,72 | 0.002  | 0.037  |
| A_23_P392429  | ZNF396         | 0,49 | 0,77 | 0,19 | 0.001  | 0.016  |
| A_33_P3283944 |                | 0,49 | 0,56 | 0,49 | <0.001 | <0.001 |
| A_21_P0010216 | XLOC_014115    | 0,49 | 0,52 | 0,29 | 0.002  | 0.027  |
| A_33_P3321293 | IQGAP3         | 0,49 | 0,12 | 0,75 | <0.001 | 0.002  |
| A_23_P374902  | CLDND2         | 0,49 | 0,56 | 0,44 | <0.001 | 0.008  |
| A_33_P3342563 | PITPNM3        | 0,48 | 0,54 | 0,43 | 0.001  | 0.012  |
| A_32_P79483   | LOC283481      | 0,48 | 0,45 | 0,61 | 0.001  | 0.022  |
| A_33_P3507562 | SNHG1          | 0,48 | 0,47 | 0,46 | 0.004  | 0.053  |
| A_21_P0007712 | XLOC_010097    | 0,48 | 0,39 | 0,46 | 0.001  | 0.016  |
| A_21_P0009683 | XLOC_012978    | 0,48 | 0,82 | 0,25 | 0.009  | 0.093  |
| A_21_P0012101 | XLOC_I2_008396 | 0,48 | 0,25 | 0,61 | <0.001 | 0.001  |
| A_23_P66180   | CACNG3         | 0,48 | 0,46 | 0,44 | 0.006  | 0.076  |
| A_21_P0002251 | XLOC_001558    | 0,48 | 0,35 | 0,52 | <0.001 | 0.009  |
| A_33_P3214466 | MESP1          | 0,47 | 0,51 | 0,43 | <0.001 | <0.001 |
| A_33_P3736195 | DKFZp686M1136  | 0,47 | 0,59 | 0,46 | 0.003  | 0.045  |
| A_23_P21376   | MAGI2          | 0,47 | 0,39 | 0,60 | 0.008  | 0.087  |
| A_21_P0002805 | XLOC_002921    | 0,47 | 0,65 | 0,35 | 0.014  | 0.132  |
| A_23_P251647  | RFESD          | 0,47 | 0,46 | 0,42 | <0.001 | 0.005  |
| A_21_P0011428 | SLC9B1         | 0,47 | 0,06 | 0,80 | 0.002  | 0.031  |
| A_21_P0010618 | XLOC_I2_000941 | 0,46 | 0,39 | 0,64 | <0.001 | 0.001  |

|                |                |      |      |      |        |        |
|----------------|----------------|------|------|------|--------|--------|
| A_23_P35977    | PDZD3          | 0,46 | 0,57 | 0,30 | <0.001 | 0.005  |
| A_33_P3401753  | FFAR3          | 0,46 | 0,47 | 0,44 | <0.001 | 0.010  |
| A_32_P196142   | LOC100130938   | 0,46 | 0,50 | 0,38 | 0.009  | 0.098  |
| A_33_P3423874  | MYZAP          | 0,46 | 0,60 | 0,35 | 0.001  | 0.017  |
| A_23_P150693   | FJX1           | 0,46 | 0,39 | 0,52 | 0.002  | 0.031  |
| A_33_P3240078  |                | 0,45 | 0,34 | 0,52 | <0.001 | 0.003  |
| A_21_P0008024  | LINC00442      | 0,45 | 0,26 | 0,57 | 0.015  | 0.139  |
| A_23_P71328    | MATN2          | 0,45 | 0,67 | 0,10 | 0.002  | 0.029  |
| A_21_P0006272  | XLOC_007718    | 0,45 | 0,37 | 0,55 | <0.001 | 0.010  |
| A_32_P3572     |                | 0,45 | 0,44 | 0,52 | <0.001 | 0.005  |
| A_21_P0004636  | XLOC_005184    | 0,44 | 0,13 | 0,55 | 0.020  | 0.168  |
| A_24_P944588   | ZNF682         | 0,44 | 0,54 | 0,21 | 0.002  | 0.034  |
| A_21_P0012789  | XLOC_I2_011227 | 0,44 | 0,08 | 0,69 | 0.004  | 0.052  |
| A_23_P88069    | LHFP           | 0,44 | 0,45 | 0,37 | <0.001 | <0.001 |
| A_21_P0007440  | XLOC_009185    | 0,44 | 0,43 | 0,49 | <0.001 | 0.002  |
| A_33_P3280597  |                | 0,43 | 0,43 | 0,44 | <0.001 | <0.001 |
| A_23_P210425   | MYL9           | 0,43 | 0,57 | 0,34 | 0.011  | 0.109  |
| A_21_P0000558  | LOC100302650   | 0,43 | 0,31 | 0,59 | 0.012  | 0.119  |
| A_33_P3270429  | NR1D2          | 0,43 | 0,26 | 0,56 | 0.001  | 0.015  |
| A_21_P0005818  | XLOC_007054    | 0,43 | 0,38 | 0,43 | <0.001 | <0.001 |
| A_33_P3359438  |                | 0,43 | 0,41 | 0,35 | <0.001 | <0.001 |
| A_33_P3226420  | RSAD2          | 0,43 | 0,66 | 0,24 | 0.002  | 0.029  |
| A_21_P0014691  | LOC100287808   | 0,43 | 0,56 | 0,04 | 0.006  | 0.071  |
| A_33_P3238290  | FAM65C         | 0,43 | 0,40 | 0,36 | 0.010  | 0.105  |
| A_23_P70719    | LAMA2          | 0,43 | 0,60 | 0,21 | 0.001  | 0.013  |
| A_23_P159335   | CD8B           | 0,42 | 0,20 | 0,43 | 0.003  | 0.048  |
| A_33_P3269110  | GUCY1A3        | 0,42 | 0,37 | 0,50 | 0.001  | 0.012  |
| A_24_P11436    | TTC22          | 0,42 | 0,13 | 0,58 | 0.005  | 0.066  |
| A_21_P0010916  | XLOC_I2_001548 | 0,42 | 0,11 | 0,42 | 0.010  | 0.106  |
| A_23_P127406   | KDM4D          | 0,42 | 0,64 | 0,15 | 0.002  | 0.029  |
| A_33_P3369446  |                | 0,42 | 0,63 | 0,28 | 0.001  | 0.024  |
| A_24_P203056   | BCL7A          | 0,42 | 0,46 | 0,39 | <0.001 | <0.001 |
| A_19_P00320543 | ZNF519         | 0,42 | 0,52 | 0,34 | 0.001  | 0.020  |
| A_33_P3277373  | OSM            | 0,42 | 0,37 | 0,52 | <0.001 | 0.005  |
| A_23_P72668    | SDPR           | 0,42 | 0,54 | 0,41 | 0.050  | 0.291  |
| A_23_P217845   | RGS16          | 0,42 | 0,29 | 0,46 | 0.002  | 0.030  |
| A_33_P3244784  |                | 0,42 | 0,28 | 0,42 | 0.002  | 0.029  |
| A_19_P00322118 | LOC728730      | 0,42 | 0,52 | 0,38 | <0.001 | 0.009  |
| A_19_P00316340 | LOC100506860   | 0,41 | 0,38 | 0,48 | 0.018  | 0.153  |
| A_33_P3323136  | ENKUR          | 0,41 | 0,60 | 0,43 | 0.035  | 0.237  |
| A_33_P3354607  | CCL4           | 0,41 | 0,34 | 0,50 | <0.001 | 0.001  |
| A_21_P0010320  | XLOC_014057    | 0,41 | 0,44 | 0,23 | 0.001  | 0.018  |
| A_23_P361841   | RIMKLB         | 0,41 | 0,29 | 0,46 | <0.001 | 0.011  |
| A_21_P0010118  | XLOC_013728    | 0,41 | 0,46 | 0,31 | <0.001 | 0.004  |
| A_19_P00321743 | LOC100130938   | 0,41 | 0,55 | 0,14 | 0.040  | 0.255  |
| A_33_P3396050  | LOC440386      | 0,41 | 0,22 | 0,46 | 0.002  | 0.035  |
| A_23_P252541   | RAB7B          | 0,41 | 0,41 | 0,44 | <0.001 | <0.001 |
| A_33_P3294103  |                | 0,41 | 0,41 | 0,22 | 0.003  | 0.042  |
| A_33_P3265030  | GP1BB          | 0,41 | 0,54 | 0,36 | 0.026  | 0.195  |
| A_23_P47682    | NRIP3          | 0,41 | 0,42 | 0,41 | <0.001 | <0.001 |

|                |                |      |       |      |        |        |
|----------------|----------------|------|-------|------|--------|--------|
| A_33_P3234202  | DNASE1L3       | 0,41 | 0,19  | 0,56 | 0.001  | 0.024  |
| A_23_P83134    | GAS1           | 0,40 | 0,34  | 0,45 | 0.004  | 0.051  |
| A_33_P3606465  | CBX3P2         | 0,40 | 0,47  | 0,34 | <0.001 | <0.001 |
| A_23_P429998   | FOSB           | 0,40 | 0,12  | 0,76 | 0.003  | 0.043  |
| A_21_P0002168  | XLOC_001342    | 0,40 | 0,22  | 0,42 | 0.001  | 0.025  |
| A_21_P0003476  | XLOC_003976    | 0,40 | -0,19 | 0,86 | 0.028  | 0.208  |
| A_33_P3332955  | CLEC1B         | 0,40 | 0,59  | 0,14 | 0.024  | 0.186  |
| A_21_P0000546  | LOC100128023   | 0,40 | 0,31  | 0,44 | 0.024  | 0.187  |
| A_33_P3275846  | CACNA1A        | 0,40 | 0,45  | 0,35 | <0.001 | <0.001 |
| A_33_P3789382  | LOC84989       | 0,40 | 0,45  | 0,27 | 0.003  | 0.044  |
| A_23_P57379    | CDC45          | 0,39 | 0,28  | 0,36 | 0.003  | 0.045  |
| A_33_P3401711  | USH1G          | 0,39 | 0,41  | 0,40 | 0.009  | 0.098  |
| A_21_P0003757  | XLOC_004049    | 0,39 | -0,08 | 0,70 | 0.031  | 0.221  |
| A_21_P0011494  | XLOC_I2_005606 | 0,39 | -0,04 | 0,75 | 0.042  | 0.267  |
| A_21_P0005617  | FLJ45248       | 0,39 | 0,39  | 0,41 | <0.001 | <0.001 |
| A_33_P3411632  | TMEM121        | 0,39 | 0,26  | 0,49 | 0.001  | 0.022  |
| A_21_P0002453  | XLOC_002131    | 0,39 | 0,43  | 0,45 | 0.010  | 0.102  |
| A_33_P3248137  | OLFML2A        | 0,39 | 0,39  | 0,35 | 0.013  | 0.126  |
| A_33_P3306146  | PLAU           | 0,39 | 0,25  | 0,48 | 0.001  | 0.020  |
| A_23_P80551    | KRBOX1         | 0,39 | 0,24  | 0,33 | 0.004  | 0.055  |
| A_23_P141092   | TFAP4          | 0,39 | 0,40  | 0,35 | 0.003  | 0.048  |
| A_23_P18672    | GBA3           | 0,38 | 0,26  | 0,37 | 0.003  | 0.045  |
| A_21_P0013104  | XLOC_I2_013149 | 0,38 | 0,10  | 0,59 | 0.012  | 0.118  |
| A_23_P74449    | HPDL           | 0,38 | 0,37  | 0,38 | 0.001  | 0.016  |
| A_21_P0000353  | SCARNA23       | 0,38 | 0,14  | 0,61 | 0.006  | 0.072  |
| A_21_P0012475  | XLOC_I2_010489 | 0,38 | 0,39  | 0,30 | 0.006  | 0.073  |
| A_21_P0002252  | XLOC_001558    | 0,38 | 0,30  | 0,49 | <0.001 | <0.001 |
| A_21_P0002573  | XLOC_001342    | 0,38 | 0,53  | 0,21 | <0.001 | 0.002  |
| A_33_P3276703  | VGf            | 0,38 | 0,37  | 0,34 | 0.006  | 0.072  |
| A_21_P0001475  | XLOC_000732    | 0,38 | 0,22  | 0,49 | <0.001 | 0.007  |
| A_21_P0003105  | XLOC_003062    | 0,38 | 0,22  | 0,51 | 0.007  | 0.084  |
| A_23_P257365   | GFI1           | 0,38 | 0,17  | 0,44 | 0.004  | 0.051  |
| A_21_P0010262  | XLOC_013973    | 0,38 | 0,68  | 0,09 | 0.004  | 0.058  |
| A_32_P232035   | LOC100270746   | 0,38 | 0,39  | 0,31 | 0.002  | 0.036  |
| A_23_P376449   |                | 0,38 | 0,41  | 0,20 | 0.013  | 0.125  |
| A_32_P80850    | COL14A1        | 0,38 | 0,19  | 0,37 | 0.035  | 0.237  |
| A_24_P220485   | OLFML2A        | 0,38 | 0,44  | 0,32 | <0.001 | 0.001  |
| A_21_P0010076  | XLOC_013431    | 0,38 | 0,48  | 0,31 | 0.014  | 0.129  |
| A_21_P0002930  | XLOC_002577    | 0,38 | 0,19  | 0,47 | 0.010  | 0.105  |
| A_19_P00320275 | XLOC_008079    | 0,38 | 0,22  | 0,35 | 0.021  | 0.171  |
| A_23_P71649    | MUSK           | 0,37 | 0,15  | 0,38 | 0.025  | 0.193  |
| A_21_P0011960  | XLOC_I2_008226 | 0,37 | 0,30  | 0,24 | 0.001  | 0.015  |
| A_33_P3357954  | ETV1           | 0,37 | 0,30  | 0,37 | 0.016  | 0.142  |
| A_19_P00321291 | IPW            | 0,37 | 0,33  | 0,41 | 0.006  | 0.071  |
| A_21_P0001541  | XLOC_000910    | 0,37 | 0,52  | 0,28 | 0.011  | 0.111  |
| A_33_P3229171  | FLJ44635       | 0,37 | 0,40  | 0,41 | <0.001 | 0.009  |
| A_33_P3382565  | KIF26B         | 0,37 | 0,43  | 0,35 | 0.005  | 0.064  |
| A_21_P0000578  | LOC100132163   | 0,37 | 0,43  | 0,40 | 0.007  | 0.082  |
| A_21_P0004276  | XLOC_004467    | 0,37 | 0,62  | 0,25 | 0.004  | 0.051  |
| A_21_P0004866  | LINC00240      | 0,37 | 0,42  | 0,18 | 0.029  | 0.208  |

|                |                |      |       |      |        |        |
|----------------|----------------|------|-------|------|--------|--------|
| A_33_P3578477  | LOC641467      | 0,37 | 0,26  | 0,37 | 0.001  | 0.024  |
| A_21_P0010465  | XLOC_014244    | 0,37 | 0,51  | 0,11 | 0.011  | 0.111  |
| A_23_P381017   | WBSCR27        | 0,37 | 0,43  | 0,35 | <0.001 | 0.010  |
| A_23_P56559    | DHRS9          | 0,37 | 0,29  | 0,43 | <0.001 | <0.001 |
| A_33_P3409124  | NR1D2          | 0,37 | 0,32  | 0,43 | <0.001 | <0.001 |
| A_33_P3341524  |                | 0,37 | 0,45  | 0,30 | <0.001 | 0.001  |
| A_21_P0010323  | XLOC_014105    | 0,37 | 0,03  | 0,56 | 0.016  | 0.142  |
| A_21_P0014562  | LOC100505636   | 0,37 | 0,59  | 0,16 | 0.012  | 0.118  |
| A_33_P3372099  | DDIT4L         | 0,36 | 0,42  | 0,20 | 0.001  | 0.019  |
| A_33_P3226735  | STL            | 0,36 | 0,44  | 0,24 | 0.006  | 0.074  |
| A_21_P0006014  | XLOC_007388    | 0,36 | 0,33  | 0,44 | 0.006  | 0.076  |
| A_23_P215744   | CTTNBP2        | 0,36 | 0,23  | 0,34 | <0.001 | 0.011  |
| A_21_P0008110  | CLYBL          | 0,36 | -0,03 | 0,44 | 0.022  | 0.173  |
| A_33_P3325643  | LINC00487      | 0,36 | 0,10  | 0,44 | 0.005  | 0.066  |
| A_24_P166663   | CDK6           | 0,36 | 0,34  | 0,42 | <0.001 | <0.001 |
| A_23_P149613   | FMO1           | 0,36 | 0,00  | 0,49 | 0.039  | 0.254  |
| A_32_P217750   | IL3RA          | 0,36 | 0,27  | 0,43 | <0.001 | <0.001 |
| A_21_P0003090  | XLOC_002996    | 0,36 | 0,25  | 0,38 | 0.008  | 0.086  |
| A_33_P3295091  | C1orf140       | 0,36 | -0,17 | 0,64 | 0.030  | 0.213  |
| A_24_P411749   | GPR126         | 0,36 | 0,33  | 0,24 | 0.012  | 0.119  |
| A_33_P3303372  | PARD3          | 0,36 | 0,39  | 0,14 | 0.011  | 0.113  |
| A_21_P0002461  | XLOC_002168    | 0,36 | 0,54  | 0,19 | 0.036  | 0.240  |
| A_33_P3302448  | LINGO3         | 0,36 | 0,39  | 0,34 | <0.001 | 0.004  |
| A_23_P327156   | LOC645431      | 0,36 | 0,43  | 0,25 | 0.015  | 0.136  |
| A_23_P302672   | DDIT4L         | 0,35 | 0,50  | 0,18 | 0.007  | 0.081  |
| A_33_P3462692  | SNORA58        | 0,35 | 0,01  | 0,55 | 0.010  | 0.103  |
| A_33_P3289246  |                | 0,35 | 0,28  | 0,37 | 0.007  | 0.078  |
| A_21_P0012085  | XLOC_I2_008221 | 0,35 | 0,33  | 0,29 | 0.005  | 0.067  |
| A_33_P3387458  | SFMBT2         | 0,35 | 0,22  | 0,49 | 0.001  | 0.021  |
| A_19_P00316013 |                | 0,35 | 0,42  | 0,20 | 0.019  | 0.160  |
| A_23_P386942   | DIRAS1         | 0,35 | 0,40  | 0,27 | 0.005  | 0.066  |
| A_21_P0007637  | XLOC_009897    | 0,35 | 0,33  | 0,39 | <0.001 | 0.007  |
| A_21_P0004676  | LINC00222      | 0,35 | 0,52  | 0,13 | 0.018  | 0.155  |
| A_21_P0013257  | LOC100289187   | 0,35 | 0,36  | 0,25 | 0.007  | 0.080  |
| A_23_P134384   | PHF14          | 0,35 | 0,37  | 0,34 | <0.001 | <0.001 |
| A_23_P380990   | CLEC4F         | 0,35 | 0,33  | 0,43 | <0.001 | 0.002  |
| A_33_P3420879  | LOC646482      | 0,35 | 0,23  | 0,39 | 0.013  | 0.127  |
| A_23_P127697   |                | 0,35 | 0,16  | 0,45 | 0.006  | 0.072  |
| A_23_P49559    | GPR142         | 0,35 | 0,37  | 0,27 | 0.033  | 0.230  |
| A_32_P163089   | C12orf75       | 0,35 | 0,17  | 0,44 | 0.021  | 0.172  |
| A_23_P42241    | OR5V1          | 0,35 | -0,24 | 0,83 | 0.042  | 0.264  |
| A_21_P0007248  | XLOC_009233    | 0,35 | 0,22  | 0,32 | 0.010  | 0.103  |
| A_32_P104432   | LINC00087      | 0,35 | 0,35  | 0,38 | 0.001  | 0.015  |
| A_23_P155487   | SLC38A3        | 0,35 | 0,32  | 0,27 | 0.031  | 0.220  |
| A_33_P3258617  | PLIN2          | 0,35 | 0,38  | 0,28 | <0.001 | 0.003  |
| A_21_P0010659  | XLOC_I2_001153 | 0,34 | 0,50  | 0,29 | 0.007  | 0.084  |
| A_21_P0009554  | XLOC_012833    | 0,34 | 0,40  | 0,35 | 0.001  | 0.019  |
| A_23_P128215   | SOCS2          | 0,34 | 0,22  | 0,18 | 0.032  | 0.224  |
| A_21_P0010940  | SLC9B1         | 0,34 | 0,20  | 0,43 | 0.009  | 0.098  |
| A_33_P3781228  | FLJ26332       | 0,34 | 0,39  | 0,30 | <0.001 | 0.001  |

|                |                |      |      |      |        |        |
|----------------|----------------|------|------|------|--------|--------|
| A_23_P41194    | LRRC34         | 0,34 | 0,38 | 0,27 | <0.001 | 0.003  |
| A_19_P00318375 | LOC148696      | 0,34 | 0,19 | 0,37 | 0.020  | 0.168  |
| A_21_P0011498  | XLOC_I2_005295 | 0,34 | 0,03 | 0,51 | 0.007  | 0.083  |
| A_33_P3307197  | PTGFRN         | 0,34 | 0,25 | 0,40 | <0.001 | <0.001 |
| A_24_P154142   | RXFP4          | 0,34 | 0,24 | 0,52 | 0.006  | 0.073  |
| A_21_P0006331  | XLOC_007879    | 0,34 | 0,40 | 0,21 | 0.002  | 0.030  |
| A_33_P3363254  |                | 0,34 | 0,12 | 0,43 | 0.022  | 0.177  |
| A_33_P3317580  | GFRA2          | 0,34 | 0,37 | 0,28 | <0.001 | <0.001 |
| A_23_P168130   | IP6K3          | 0,34 | 0,12 | 0,54 | 0.021  | 0.173  |
| A_23_P401361   | PITPNM2        | 0,34 | 0,42 | 0,19 | 0.032  | 0.224  |
| A_21_P0003626  | XLOC_003595    | 0,34 | 0,30 | 0,31 | 0.003  | 0.044  |
| A_24_P313180   | C14orf1        | 0,34 | 0,38 | 0,24 | 0.024  | 0.184  |
| A_33_P3502914  | ZDHHC8P1       | 0,34 | 0,16 | 0,50 | 0.007  | 0.078  |
| A_23_P422981   | FBXO36         | 0,34 | 0,44 | 0,28 | 0.003  | 0.049  |
| A_23_P20697    | ADAMTSL2       | 0,33 | 0,50 | 0,28 | 0.019  | 0.159  |
| A_33_P3280705  |                | 0,33 | 0,30 | 0,36 | 0.017  | 0.147  |
| A_33_P3342780  | ADAMTS13       | 0,33 | 0,38 | 0,21 | 0.004  | 0.055  |
| A_33_P3423530  | TPK1           | 0,33 | 0,36 | 0,24 | 0.021  | 0.168  |
| A_33_P3353365  | SLC17A4        | 0,33 | 0,36 | 0,16 | 0.039  | 0.253  |
| A_21_P0000122  | LOC100288814   | 0,33 | 0,16 | 0,46 | 0.018  | 0.154  |
| A_21_P0014363  | LOC100505577   | 0,33 | 0,30 | 0,33 | 0.017  | 0.148  |
| A_33_P3314659  | SPEF2          | 0,33 | 0,37 | 0,28 | 0.006  | 0.069  |
| A_21_P0002823  | XLOC_002968    | 0,33 | 0,06 | 0,47 | 0.026  | 0.195  |
| A_21_P0012177  | XLOC_I2_009105 | 0,33 | 0,37 | 0,49 | 0.010  | 0.104  |
| A_19_P00322453 | XLOC_I2_010405 | 0,33 | 0,33 | 0,19 | 0.009  | 0.097  |
| A_21_P0007888  | XLOC_010172    | 0,33 | 0,39 | 0,15 | 0.008  | 0.092  |
| A_33_P3228340  | DYNC2LI1       | 0,33 | 0,52 | 0,20 | 0.010  | 0.107  |
| A_21_P0004838  | XLOC_005173    | 0,33 | 0,46 | 0,15 | 0.021  | 0.171  |
| A_33_P3243667  | ZNF678         | 0,33 | 0,56 | 0,15 | 0.036  | 0.242  |
| A_21_P0001931  | XLOC_001728    | 0,33 | 0,35 | 0,24 | 0.009  | 0.100  |
| A_33_P3256550  | MST152         | 0,33 | 0,29 | 0,29 | 0.022  | 0.177  |
| A_23_P119353   | RASIP1         | 0,33 | 0,21 | 0,44 | 0.008  | 0.090  |
| A_21_P0000960  | XLOC_000107    | 0,33 | 0,23 | 0,39 | <0.001 | <0.001 |
| A_23_P147245   | OSBPL10        | 0,33 | 0,20 | 0,36 | 0.004  | 0.058  |
| A_33_P3336720  | HAMP           | 0,33 | 0,20 | 0,35 | <0.001 | <0.001 |
| A_23_P216596   | SVEP1          | 0,33 | 0,14 | 0,40 | 0.003  | 0.042  |
| A_33_P3209615  | KRTAP4-8       | 0,33 | 0,26 | 0,44 | <0.001 | 0.008  |
| A_33_P3248035  |                | 0,33 | 0,29 | 0,31 | 0.004  | 0.050  |
| A_33_P3305446  | DEFB121        | 0,33 | 0,14 | 0,49 | 0.045  | 0.274  |
| A_33_P3222917  | CD276          | 0,32 | 0,37 | 0,25 | <0.001 | 0.001  |
| A_33_P3548860  | SEC1           | 0,32 | 0,39 | 0,31 | <0.001 | <0.001 |
| A_21_P0006517  | XLOC_008072    | 0,32 | 0,55 | 0,09 | 0.025  | 0.188  |
| A_33_P3371703  |                | 0,32 | 0,37 | 0,34 | 0.018  | 0.155  |
| A_21_P0014565  | LOC100507484   | 0,32 | 0,07 | 0,49 | 0.034  | 0.233  |
| A_33_P3353190  |                | 0,32 | 0,32 | 0,38 | 0.001  | 0.024  |
| A_32_P40744    |                | 0,32 | 0,23 | 0,34 | 0.001  | 0.019  |
| A_21_P0013304  | XLOC_I2_013808 | 0,32 | 0,27 | 0,41 | 0.013  | 0.124  |
| A_21_P0009978  | XLOC_013574    | 0,32 | 0,29 | 0,43 | 0.019  | 0.159  |
| A_21_P0005688  | XLOC_006774    | 0,32 | 0,32 | 0,34 | <0.001 | 0.002  |
| A_33_P3306948  | LRP6           | 0,32 | 0,06 | 0,36 | 0.005  | 0.064  |

|                |                |      |       |       |        |       |
|----------------|----------------|------|-------|-------|--------|-------|
| A_33_P3376090  | OR1J4          | 0,32 | 0,23  | 0,28  | 0.003  | 0.044 |
| A_33_P3334180  | PLCH2          | 0,32 | -0,20 | 0,57  | 0.012  | 0.119 |
| A_33_P3351180  |                | 0,32 | 0,33  | 0,22  | 0.034  | 0.232 |
| A_23_P31984    | ACTL7A         | 0,32 | 0,43  | -0,03 | 0.023  | 0.179 |
| A_19_P00321382 | LOC100506860   | 0,32 | 0,25  | 0,40  | 0.003  | 0.046 |
| A_24_P270728   | NUPR1          | 0,32 | 0,37  | 0,25  | 0.018  | 0.155 |
| A_21_P0014463  | LOC100507133   | 0,32 | 0,36  | 0,29  | 0.001  | 0.025 |
| A_23_P368718   | SPRYD7         | 0,32 | 0,15  | 0,47  | 0.015  | 0.135 |
| A_33_P3359704  | ZNF703         | 0,32 | 0,32  | 0,33  | <0.001 | 0.006 |
| A_32_P799227   | FAM22A         | 0,32 | 0,10  | 0,42  | 0.006  | 0.070 |
| A_23_P404162   | HDAC9          | 0,32 | 0,22  | 0,45  | 0.001  | 0.023 |
| A_21_P0012074  | LOC654342      | 0,32 | 0,27  | 0,26  | 0.022  | 0.177 |
| A_21_P0011383  | UBE2Q2P2       | 0,32 | 0,19  | 0,41  | 0.011  | 0.111 |
| A_33_P3306749  | OLFM1          | 0,32 | 0,25  | 0,46  | 0.036  | 0.242 |
| A_21_P0007541  | XLOC_009707    | 0,32 | 0,22  | 0,33  | 0.041  | 0.262 |
| A_21_P0010866  | XLOC_I2_001929 | 0,32 | 0,23  | 0,38  | 0.021  | 0.168 |
| A_21_P0009835  | LOC100270679   | 0,31 | 0,23  | 0,24  | 0.027  | 0.199 |
| A_32_P158083   | LHFPL3         | 0,31 | 0,16  | 0,43  | 0.020  | 0.166 |
| A_24_P176714   | B9D1           | 0,31 | 0,39  | 0,31  | <0.001 | 0.001 |
| A_33_P3338047  | PNPLA7         | 0,31 | 0,29  | 0,19  | 0.005  | 0.062 |
| A_21_P0013875  | XLOC_I2_015878 | 0,31 | 0,01  | 0,46  | 0.018  | 0.154 |
| A_33_P3217020  | RAPH1          | 0,31 | 0,20  | 0,41  | <0.001 | 0.001 |
| A_23_P135257   | PRSS3          | 0,31 | 0,45  | 0,15  | 0.003  | 0.047 |
| A_23_P147665   | OLFML1         | 0,31 | 0,19  | 0,28  | 0.014  | 0.131 |
| A_23_P309198   | C21orf67       | 0,31 | 0,40  | 0,22  | 0.017  | 0.148 |
| A_24_P246293   | FDXACB1        | 0,31 | 0,40  | 0,17  | 0.009  | 0.100 |
| A_21_P0006472  | XLOC_008263    | 0,31 | 0,14  | 0,50  | 0.002  | 0.029 |
| A_21_P0011983  | XLOC_I2_008396 | 0,31 | 0,14  | 0,46  | 0.015  | 0.134 |
| A_21_P0002743  | XLOC_002664    | 0,31 | 0,24  | 0,31  | 0.007  | 0.084 |
| A_33_P3401119  | FAM22F         | 0,31 | 0,15  | 0,42  | 0.006  | 0.073 |
| A_33_P3379486  | LOC100130581   | 0,31 | 0,32  | 0,29  | 0.011  | 0.109 |
| A_33_P3686706  | C14orf99       | 0,31 | 0,21  | 0,33  | 0.004  | 0.053 |
| A_33_P3390539  | GYLTL1B        | 0,31 | 0,16  | 0,30  | 0.009  | 0.094 |
| A_23_P26325    | CCL17          | 0,31 | 0,28  | 0,25  | 0.012  | 0.116 |
| A_33_P3391100  |                | 0,31 | 0,47  | 0,19  | 0.004  | 0.059 |
| A_23_P332584   | KIAA1107       | 0,31 | 0,46  | 0,33  | 0.006  | 0.073 |
| A_33_P3235731  |                | 0,31 | 0,27  | 0,29  | 0.024  | 0.187 |
| A_21_P0004296  | XLOC_004548    | 0,31 | 0,25  | 0,44  | 0.022  | 0.178 |
| A_23_P346800   | AVPR2          | 0,31 | 0,23  | 0,12  | 0.042  | 0.266 |
| A_33_P3882624  | POT1           | 0,31 | 0,17  | 0,31  | 0.004  | 0.059 |
| A_21_P0000065  | SLC1A3         | 0,31 | 0,46  | 0,18  | 0.021  | 0.171 |
| A_33_P3394140  | LOC283050      | 0,31 | 0,34  | 0,37  | <0.001 | 0.004 |
| A_21_P0012280  | VWF            | 0,31 | 0,13  | 0,53  | 0.004  | 0.055 |
| A_19_P00322426 | LOC441204      | 0,31 | 0,46  | 0,20  | 0.003  | 0.043 |
| A_24_P281636   |                | 0,31 | 0,14  | 0,32  | 0.028  | 0.205 |
| A_21_P0002165  | XLOC_001338    | 0,30 | 0,09  | 0,50  | 0.023  | 0.180 |
| A_21_P0001958  | XLOC_001826    | 0,30 | 0,15  | 0,49  | 0.045  | 0.277 |
| A_21_P0001786  | XLOC_002049    | 0,30 | 0,49  | 0,07  | 0.023  | 0.181 |
| A_33_P3417086  | NIPAL1         | 0,30 | 0,09  | 0,50  | 0.013  | 0.125 |
| A_23_P357248   | ZNF343         | 0,30 | 0,36  | 0,23  | 0.004  | 0.058 |

|                |                |      |       |       |        |       |
|----------------|----------------|------|-------|-------|--------|-------|
| A_24_P409985   | TMEM44         | 0,30 | 0,22  | 0,30  | 0.020  | 0.165 |
| A_23_P107465   | KRT31          | 0,30 | 0,20  | 0,33  | 0.001  | 0.021 |
| A_33_P3210358  |                | 0,30 | 0,19  | 0,37  | 0.011  | 0.109 |
| A_33_P3344765  |                | 0,30 | 0,31  | 0,06  | 0.037  | 0.247 |
| A_33_P3394965  |                | 0,30 | 0,42  | 0,09  | 0.009  | 0.099 |
| A_24_P510357   |                | 0,30 | 0,04  | 0,47  | 0.026  | 0.195 |
| A_23_P126649   | PGBD5          | 0,30 | 0,24  | 0,31  | 0.008  | 0.089 |
| A_23_P107775   | TMEM190        | 0,30 | 0,21  | 0,23  | 0.007  | 0.080 |
| A_21_P0014250  | LOC100289455   | 0,30 | 0,39  | 0,19  | 0.010  | 0.106 |
| A_33_P3326382  | STX1B          | 0,30 | 0,20  | 0,30  | 0.044  | 0.273 |
| A_21_P0013468  | XLOC_I2_014101 | 0,30 | 0,21  | 0,38  | 0.002  | 0.029 |
| A_23_P113656   | TUBB4A         | 0,30 | 0,08  | 0,35  | 0.013  | 0.123 |
| A_23_P431305   | FAM69B         | 0,30 | 0,25  | 0,30  | 0.015  | 0.135 |
| A_33_P3251761  |                | 0,30 | 0,28  | 0,28  | 0.001  | 0.025 |
| A_19_P00319712 | Q442D3         | 0,30 | 0,40  | 0,18  | 0.003  | 0.039 |
| A_21_P0003704  | XLOC_003839    | 0,30 | 0,26  | 0,37  | <0.001 | 0.001 |
| A_33_P3314301  | SV2C           | 0,30 | 0,06  | 0,43  | 0.024  | 0.186 |
| A_21_P0009342  | LOC645638      | 0,30 | 0,26  | 0,18  | 0.032  | 0.222 |
| A_21_P0011301  | WHAMMP2        | 0,30 | 0,27  | 0,26  | 0.007  | 0.079 |
| A_21_P0003930  | XLOC_004577    | 0,30 | 0,32  | 0,23  | 0.045  | 0.277 |
| A_33_P3355252  |                | 0,30 | 0,22  | 0,46  | 0.037  | 0.245 |
| A_32_P89352    | MACROD2        | 0,29 | 0,31  | 0,10  | 0.002  | 0.032 |
| A_33_P3337134  | ABLIM2         | 0,29 | 0,07  | 0,47  | 0.033  | 0.231 |
| A_23_P29096    | PDE9A          | 0,29 | 0,46  | 0,05  | 0.006  | 0.074 |
| A_33_P3348011  | TOB2P1         | 0,29 | 0,29  | 0,31  | <0.001 | 0.006 |
| A_33_P3334773  | MYOD1          | 0,29 | 0,30  | 0,18  | 0.032  | 0.226 |
| A_21_P0000547  | TNIK           | 0,29 | 0,31  | 0,24  | 0.007  | 0.080 |
| A_23_P106024   | JAG2           | 0,29 | 0,33  | 0,29  | <0.001 | 0.001 |
| A_23_P325924   | FAM59B         | 0,29 | 0,43  | 0,08  | 0.046  | 0.279 |
| A_21_P0003338  | XLOC_003465    | 0,29 | 0,25  | 0,40  | 0.001  | 0.026 |
| A_21_P0012898  | XLOC_I2_011987 | 0,29 | 0,39  | 0,18  | 0.021  | 0.173 |
| A_23_P201066   | SUSD4          | 0,29 | 0,28  | 0,13  | 0.031  | 0.221 |
| A_23_P83634    | ALOX12B        | 0,29 | 0,44  | -0,03 | 0.013  | 0.125 |
| A_33_P3402257  | MS4A18         | 0,29 | 0,26  | 0,17  | 0.021  | 0.169 |
| A_33_P3319765  | FANCC          | 0,29 | 0,17  | 0,24  | 0.020  | 0.166 |
| A_23_P365738   | ARC            | 0,29 | 0,24  | 0,30  | 0.017  | 0.150 |
| A_21_P0014213  | LOC100506966   | 0,29 | 0,44  | 0,07  | 0.012  | 0.115 |
| A_23_P214897   | AKAP12         | 0,29 | 0,06  | 0,55  | 0.038  | 0.250 |
| A_21_P0010732  | XLOC_I2_000465 | 0,29 | -0,25 | 0,52  | 0.038  | 0.250 |
| A_32_P52018    | PHACTR1        | 0,29 | 0,36  | 0,25  | 0.003  | 0.041 |
| A_23_P421011   | KAZALD1        | 0,29 | 0,39  | 0,11  | 0.027  | 0.199 |
| A_23_P145024   | ADRB2          | 0,29 | 0,34  | 0,28  | <0.001 | 0.008 |
| A_33_P3241786  | ADD2           | 0,29 | 0,27  | 0,35  | 0.005  | 0.067 |
| A_21_P0000843  | LOC100507250   | 0,29 | 0,08  | 0,39  | 0.030  | 0.215 |
| A_33_P3357292  | WBP2NL         | 0,29 | 0,52  | 0,11  | 0.007  | 0.084 |
| A_21_P0010762  | XLOC_I2_000941 | 0,29 | 0,16  | 0,39  | 0.030  | 0.214 |
| A_33_P3397314  |                | 0,29 | 0,20  | 0,33  | 0.017  | 0.150 |
| A_33_P3232692  | IL24           | 0,29 | 0,24  | 0,23  | 0.022  | 0.174 |
| A_32_P120791   | LOC727916      | 0,29 | 0,25  | 0,30  | 0.022  | 0.177 |
| A_21_P0010742  | XLOC_I2_000636 | 0,29 | 0,36  | 0,28  | 0.011  | 0.112 |



|                |                |      |       |       |        |       |
|----------------|----------------|------|-------|-------|--------|-------|
| A_21_P0003868  | XLOC_003807    | 0,29 | -0,01 | 0,52  | 0,047  | 0,283 |
| A_21_P0007043  | LOC399715      | 0,29 | 0,49  | 0,27  | 0,013  | 0,124 |
| A_21_P0009384  | XLOC_012161    | 0,29 | 0,02  | 0,45  | 0,048  | 0,285 |
| A_23_P125977   | C1QC           | 0,29 | 0,39  | 0,14  | 0,007  | 0,079 |
| A_33_P3374778  | FLJ36644       | 0,29 | 0,28  | 0,37  | 0,030  | 0,215 |
| A_21_P0002590  | XLOC_001441    | 0,29 | 0,37  | 0,17  | 0,033  | 0,230 |
| A_23_P254831   | MAGEB2         | 0,29 | 0,39  | 0,21  | 0,047  | 0,282 |
| A_33_P3305998  |                | 0,29 | 0,07  | 0,46  | 0,012  | 0,120 |
| A_23_P143906   | MLF1           | 0,29 | 0,26  | 0,39  | 0,039  | 0,254 |
| A_33_P3221843  | COQ3           | 0,29 | 0,19  | 0,39  | 0,001  | 0,019 |
| A_24_P392022   | FAM86A         | 0,29 | 0,57  | 0,09  | 0,016  | 0,145 |
| A_21_P0005812  | XLOC_007037    | 0,29 | 0,13  | 0,35  | 0,030  | 0,214 |
| A_21_P0003627  | XLOC_003595    | 0,29 | 0,21  | 0,35  | 0,001  | 0,014 |
| A_21_P0007368  | XLOC_009494    | 0,29 | 0,57  | 0,06  | 0,025  | 0,193 |
| A_33_P3390187  | NHLRC4         | 0,29 | 0,27  | 0,22  | 0,013  | 0,123 |
| A_23_P99442    | FLT3           | 0,29 | 0,38  | 0,18  | 0,023  | 0,179 |
| A_33_P3282556  | TMEM204        | 0,29 | 0,17  | 0,29  | 0,001  | 0,020 |
| A_21_P0008554  | XLOC_011213    | 0,28 | 0,28  | 0,27  | 0,037  | 0,244 |
| A_21_P0007265  | XLOC_009252    | 0,28 | 0,26  | 0,27  | 0,022  | 0,178 |
| A_21_P0005495  | XLOC_006436    | 0,28 | 0,34  | 0,20  | <0,001 | 0,010 |
| A_33_P3325395  |                | 0,28 | 0,25  | 0,20  | 0,041  | 0,261 |
| A_21_P0013437  | XLOC_I2_013874 | 0,28 | 0,27  | 0,22  | 0,024  | 0,188 |
| A_33_P3401093  | FBXO36         | 0,28 | 0,38  | 0,18  | 0,012  | 0,119 |
| A_21_P0014599  | LOC100506007   | 0,28 | 0,23  | 0,23  | 0,015  | 0,135 |
| A_21_P0010995  | XLOC_I2_002441 | 0,28 | 0,45  | 0,04  | 0,010  | 0,106 |
| A_33_P3276250  | TMEM191C       | 0,28 | 0,12  | 0,43  | 0,012  | 0,117 |
| A_33_P3233165  | CCDC104        | 0,28 | 0,50  | 0,09  | 0,040  | 0,259 |
| A_21_P0005409  | XLOC_006188    | 0,28 | 0,37  | 0,15  | 0,010  | 0,101 |
| A_19_P00320288 | OXR1           | 0,28 | 0,45  | 0,09  | 0,012  | 0,120 |
| A_21_P0012135  | LOC100507629   | 0,28 | 0,22  | 0,27  | 0,050  | 0,291 |
| A_21_P0006871  | XLOC_008481    | 0,28 | 0,12  | 0,22  | 0,048  | 0,286 |
| A_23_P32078    | SLC28A3        | 0,28 | 0,51  | 0,16  | 0,015  | 0,138 |
| A_23_P110531   | FST            | 0,28 | 0,10  | 0,43  | 0,018  | 0,157 |
| A_33_P3297126  | TSNARE1        | 0,28 | 0,33  | 0,30  | <0,001 | 0,010 |
| A_21_P0002501  | XLOC_002309    | 0,28 | 0,19  | 0,38  | 0,017  | 0,148 |
| A_33_P3401661  |                | 0,28 | 0,12  | 0,27  | 0,021  | 0,171 |
| A_23_P76622    | DCT            | 0,28 | 0,23  | 0,16  | 0,049  | 0,289 |
| A_21_P0012700  | XLOC_I2_011407 | 0,28 | 0,49  | -0,06 | 0,030  | 0,215 |
| A_33_P3215605  |                | 0,28 | 0,10  | 0,50  | 0,033  | 0,230 |
| A_24_P165205   | MORN1          | 0,28 | 0,29  | 0,28  | 0,009  | 0,100 |
| A_33_P3236065  | CLEC1B         | 0,28 | 0,44  | 0,11  | 0,048  | 0,288 |
| A_33_P3253598  | GYG2P1         | 0,28 | 0,35  | 0,21  | 0,031  | 0,217 |
| A_21_P0001336  | LRRC8C         | 0,28 | 0,17  | 0,38  | 0,002  | 0,033 |
| A_21_P0005031  | XLOC_005755    | 0,28 | 0,09  | 0,40  | 0,036  | 0,244 |
| A_21_P0006177  | XLOC_007451    | 0,28 | 0,20  | 0,23  | 0,014  | 0,132 |
| A_19_P00318519 | LOC100506259   | 0,28 | -0,20 | 0,69  | 0,050  | 0,291 |
| A_21_P0012726  | XLOC_I2_010679 | 0,28 | 0,03  | 0,52  | 0,050  | 0,292 |
| A_23_P79108    | ATP8B3         | 0,28 | 0,13  | 0,37  | <0,001 | 0,011 |
| A_23_P153964   | INHBB          | 0,28 | 0,21  | 0,30  | 0,044  | 0,273 |
| A_21_P0004156  | XLOC_004928    | 0,28 | -0,18 | 0,64  | 0,043  | 0,267 |

|                |                |      |       |      |        |        |
|----------------|----------------|------|-------|------|--------|--------|
| A_33_P3224078  | LOC442421      | 0,28 | 0,39  | 0,08 | 0.004  | 0.050  |
| A_24_P48403    | YES1           | 0,28 | 0,05  | 0,43 | 0.013  | 0.127  |
| A_21_P0002186  | DNAJC27-AS1    | 0,28 | 0,27  | 0,31 | 0.049  | 0.291  |
| A_21_P0003312  | XLOC_003400    | 0,28 | 0,26  | 0,26 | 0.001  | 0.016  |
| A_21_P0000130  | LOC100289187   | 0,28 | 0,32  | 0,23 | 0.004  | 0.058  |
| A_23_P46315    | DENND2C        | 0,28 | 0,31  | 0,26 | 0.029  | 0.212  |
| A_21_P0010829  | XLOC_I2_001597 | 0,28 | 0,29  | 0,29 | 0.047  | 0.282  |
| A_21_P0011201  | TPTE2P3        | 0,28 | 0,02  | 0,46 | 0.034  | 0.233  |
| A_21_P0002627  | XLOC_001835    | 0,28 | 0,26  | 0,25 | 0.034  | 0.234  |
| A_24_P162373   | ZNRF3          | 0,28 | 0,34  | 0,19 | <0.001 | <0.001 |
| A_24_P79070    | GNG8           | 0,28 | 0,33  | 0,15 | 0.011  | 0.111  |
| A_33_P3271246  |                | 0,28 | 0,27  | 0,19 | 0.009  | 0.100  |
| A_21_P0011013  | XLOC_I2_002729 | 0,28 | 0,36  | 0,08 | 0.005  | 0.060  |
| A_33_P3423121  | RDX            | 0,28 | 0,15  | 0,33 | 0.044  | 0.272  |
| A_23_P256047   | ANKRD5         | 0,28 | 0,48  | 0,24 | 0.023  | 0.180  |
| A_33_P3358943  | GRM2           | 0,28 | 0,30  | 0,21 | 0.015  | 0.135  |
| A_24_P50091    | DNM1P46        | 0,28 | 0,21  | 0,30 | 0.003  | 0.042  |
| A_21_P0003716  | XLOC_003867    | 0,28 | 0,27  | 0,09 | 0.014  | 0.130  |
| A_33_P3215739  | LNP1           | 0,27 | 0,09  | 0,45 | 0.011  | 0.111  |
| A_21_P0002948  | XLOC_002618    | 0,27 | -0,01 | 0,46 | 0.023  | 0.178  |
| A_23_P9869     | CNDP1          | 0,27 | 0,33  | 0,12 | 0.021  | 0.170  |
| A_33_P3375899  |                | 0,27 | 0,13  | 0,25 | 0.047  | 0.282  |
| A_21_P0009867  | XLOC_013589    | 0,27 | 0,16  | 0,30 | 0.009  | 0.096  |
| A_21_P0010863  | LINC00202      | 0,27 | 0,30  | 0,25 | 0.014  | 0.128  |
| A_24_P927325   | C2CD3          | 0,27 | 0,34  | 0,29 | 0.004  | 0.052  |
| A_23_P216845   | GFI1B          | 0,27 | 0,30  | 0,16 | 0.002  | 0.029  |
| A_21_P0008784  | XLOC_011586    | 0,27 | 0,30  | 0,21 | 0.022  | 0.175  |
| A_21_P0006886  | XLOC_008530    | 0,27 | 0,32  | 0,27 | 0.043  | 0.267  |
| A_23_P125686   | INGX           | 0,27 | 0,23  | 0,19 | 0.037  | 0.245  |
| A_21_P0010651  | XLOC_I2_001089 | 0,27 | 0,29  | 0,05 | 0.033  | 0.231  |
| A_33_P3384578  |                | 0,27 | 0,23  | 0,16 | 0.027  | 0.199  |
| A_32_P163858   | SCD            | 0,27 | 0,20  | 0,33 | 0.001  | 0.017  |
| A_21_P0002669  | XLOC_002198    | 0,27 | 0,15  | 0,33 | 0.045  | 0.277  |
| A_33_P3249305  | CHRD           | 0,27 | 0,17  | 0,50 | 0.019  | 0.161  |
| A_21_P0010211  | LOC100505974   | 0,27 | 0,16  | 0,31 | 0.006  | 0.075  |
| A_21_P0014166  | LOC100506379   | 0,27 | 0,37  | 0,04 | 0.001  | 0.018  |
| A_23_P314145   | UST            | 0,27 | 0,34  | 0,10 | 0.029  | 0.212  |
| A_33_P3332999  |                | 0,27 | 0,22  | 0,28 | 0.023  | 0.180  |
| A_21_P0013472  | XLOC_I2_014182 | 0,27 | 0,27  | 0,09 | 0.040  | 0.258  |
| A_21_P0010623  | XLOC_I2_000941 | 0,27 | 0,26  | 0,22 | 0.028  | 0.204  |
| A_21_P0010619  | XLOC_I2_000941 | 0,27 | 0,24  | 0,29 | 0.005  | 0.060  |
| A_33_P3316318  | CEP120         | 0,27 | 0,21  | 0,35 | 0.031  | 0.221  |
| A_23_P129801   | RAB40B         | 0,27 | 0,36  | 0,16 | <0.001 | <0.001 |
| A_32_P152195   | STAC2          | 0,27 | 0,27  | 0,18 | 0.013  | 0.126  |
| A_33_P3328814  | SETBP1         | 0,27 | 0,40  | 0,09 | 0.047  | 0.283  |
| A_23_P31725    | BLK            | 0,27 | 0,21  | 0,25 | 0.004  | 0.056  |
| A_23_P16189    | PRKCG          | 0,27 | 0,09  | 0,43 | 0.018  | 0.156  |
| A_21_P0008247  | XLOC_010544    | 0,27 | 0,30  | 0,26 | 0.015  | 0.134  |
| A_19_P00317553 | XLOC_011803    | 0,27 | 0,21  | 0,35 | 0.004  | 0.058  |
| A_33_P3339361  | ARHGAP11A      | 0,27 | 0,10  | 0,50 | 0.029  | 0.210  |

|                |                |      |      |      |        |       |
|----------------|----------------|------|------|------|--------|-------|
| A_33_P3281373  |                | 0,27 | 0,39 | 0,10 | 0.038  | 0.248 |
| A_33_P3403162  | SLC18A1        | 0,27 | 0,27 | 0,12 | 0.042  | 0.264 |
| A_21_P0011382  | XLOC_I2_005020 | 0,27 | 0,17 | 0,35 | 0.001  | 0.015 |
| A_19_P00320434 | XLOC_001728    | 0,27 | 0,07 | 0,37 | <0.001 | 0.010 |
| A_23_P34888    | CHIA           | 0,27 | 0,09 | 0,37 | 0.035  | 0.236 |
| A_19_P00323082 | H19            | 0,27 | 0,37 | 0,30 | 0.028  | 0.204 |
| A_21_P0009797  | XLOC_013181    | 0,27 | 0,44 | 0,05 | 0.027  | 0.199 |
| A_21_P0009837  | XLOC_013494    | 0,27 | 0,19 | 0,24 | 0.036  | 0.244 |
| A_33_P3351495  |                | 0,27 | 0,35 | 0,16 | 0.045  | 0.277 |
| A_33_P3336760  | ABCB4          | 0,27 | 0,45 | 0,17 | 0.028  | 0.207 |
| A_23_P389987   | TLX2           | 0,27 | 0,34 | 0,07 | 0.036  | 0.241 |
| A_19_P00315753 | LOC344595      | 0,27 | 0,09 | 0,28 | 0.030  | 0.215 |
| A_21_P0006369  | LOC100288842   | 0,27 | 0,38 | 0,20 | 0.005  | 0.064 |
| A_21_P0011508  | XLOC_I2_005622 | 0,27 | 0,09 | 0,37 | 0.012  | 0.115 |
| A_33_P3398331  | MMP24          | 0,26 | 0,40 | 0,14 | 0.012  | 0.120 |
| A_21_P0003319  | XLOC_003737    | 0,26 | 0,24 | 0,11 | 0.047  | 0.282 |
| A_21_P0003603  | XLOC_003514    | 0,26 | 0,13 | 0,30 | 0.007  | 0.083 |
| A_24_P943566   | PHACTR1        | 0,26 | 0,20 | 0,33 | 0.016  | 0.143 |
| A_33_P3325285  |                | 0,26 | 0,23 | 0,22 | 0.037  | 0.247 |

## Supplemental Table 5

The table shows the transcripts which were down-regulated 180 minutes post-stress exposure compared to the pre-stress timepoint in both groups. It shows the differences in log<sub>2</sub> expression values (t<sub>2</sub>-t<sub>0</sub>) across both groups, and separately for the control group and the early adversity group. The *p*-values result from the limma *t*-test. The *p*-values were multiplicity-adjusted to control the false discovery rate (FDR) by the Benjamini–Hochberg procedure.

t<sub>0</sub>: 45 minutes pre-stress exposure; t<sub>2</sub>: 180 minutes post-stress exposure

| Agilent Probe ID | Gene Symbol    | Mean expression change across both groups t <sub>1</sub> -t <sub>0</sub> (log <sub>2</sub> expression values) | Control Group (log <sub>2</sub> expression values t <sub>1</sub> -t <sub>0</sub> ) | Early Adversity (log <sub>2</sub> expression values t <sub>1</sub> -t <sub>0</sub> ) | p-value (main effect stress) | adj. p-value (main effect stress) |
|------------------|----------------|---------------------------------------------------------------------------------------------------------------|------------------------------------------------------------------------------------|--------------------------------------------------------------------------------------|------------------------------|-----------------------------------|
| A_21_P0007219    | XLOC_009167    | -0,72                                                                                                         | -0,80                                                                              | -0,62                                                                                | <0.001                       | 0.001                             |
| A_33_P3379881    |                | -0,64                                                                                                         | -0,36                                                                              | -0,82                                                                                | <0.001                       | 0.001                             |
| A_33_P3385351    |                | -0,63                                                                                                         | -0,02                                                                              | -0,72                                                                                | 0.039                        | 0.255                             |
| A_33_P3318766    |                | -0,61                                                                                                         | -0,05                                                                              | -0,61                                                                                | 0.047                        | 0.282                             |
| A_33_P3346688    | HSPA8          | -0,60                                                                                                         | -0,67                                                                              | -0,40                                                                                | <0.001                       | <0.001                            |
| A_33_P3314813    | C11orf94       | -0,60                                                                                                         | -0,54                                                                              | -0,56                                                                                | <0.001                       | <0.001                            |
| A_23_P4714       | MIA            | -0,59                                                                                                         | -0,55                                                                              | -0,63                                                                                | <0.001                       | <0.001                            |
| A_33_P3262074    |                | -0,59                                                                                                         | -0,56                                                                              | -0,57                                                                                | <0.001                       | <0.001                            |
| A_21_P0010087    | XLOC_013531    | -0,58                                                                                                         | -0,97                                                                              | -0,06                                                                                | 0.007                        | 0.083                             |
| A_33_P3691168    | IL31RA         | -0,57                                                                                                         | -0,60                                                                              | -0,57                                                                                | <0.001                       | <0.001                            |
| A_23_P7684       | CCNJL          | -0,56                                                                                                         | -0,52                                                                              | -0,50                                                                                | 0.004                        | 0.054                             |
| A_33_P3593774    | PIK3R3         | -0,54                                                                                                         | -0,37                                                                              | -0,63                                                                                | <0.001                       | 0.009                             |
| A_33_P3348752    | HSPH1          | -0,54                                                                                                         | -0,58                                                                              | -0,53                                                                                | <0.001                       | <0.001                            |
| A_23_P43157      | MYBL1          | -0,53                                                                                                         | -0,73                                                                              | -0,48                                                                                | 0.010                        | 0.105                             |
| A_21_P0014451    | LOC100287506   | -0,53                                                                                                         | -0,39                                                                              | -0,63                                                                                | 0.046                        | 0.278                             |
| A_21_P0012108    | XLOC_I2_008450 | -0,53                                                                                                         | -0,65                                                                              | -0,38                                                                                | 0.006                        | 0.076                             |
| A_33_P3304533    | RNF207         | -0,53                                                                                                         | -0,43                                                                              | -0,61                                                                                | <0.001                       | <0.001                            |
| A_33_P3371999    | TPPP           | -0,52                                                                                                         | -0,54                                                                              | -0,46                                                                                | <0.001                       | <0.001                            |
| A_21_P0004617    | XLOC_005900    | -0,52                                                                                                         | -0,41                                                                              | -0,48                                                                                | <0.001                       | <0.001                            |
| A_33_P3323463    | HSPA8          | -0,51                                                                                                         | -0,52                                                                              | -0,43                                                                                | <0.001                       | <0.001                            |
| A_24_P245379     | SERPINB2       | -0,51                                                                                                         | -0,39                                                                              | -0,66                                                                                | <0.001                       | <0.001                            |
| A_21_P0001004    | XLOC_000357    | -0,51                                                                                                         | -0,44                                                                              | -0,49                                                                                | <0.001                       | 0.007                             |
| A_23_P88119      | HSPH1          | -0,51                                                                                                         | -0,53                                                                              | -0,53                                                                                | <0.001                       | <0.001                            |
| A_33_P3288605    |                | -0,51                                                                                                         | -0,47                                                                              | -0,57                                                                                | <0.001                       | <0.001                            |
| A_33_P3807268    | DNAJA1P5       | -0,50                                                                                                         | -0,51                                                                              | -0,47                                                                                | <0.001                       | 0.006                             |
| A_21_P0002056    | XLOC_002122    | -0,50                                                                                                         | -0,54                                                                              | -0,35                                                                                | <0.001                       | 0.004                             |
| A_33_P3369317    | DNAJB5         | -0,49                                                                                                         | -0,44                                                                              | -0,52                                                                                | <0.001                       | <0.001                            |
| A_21_P0011725    | XLOC_I2_006944 | -0,49                                                                                                         | -0,61                                                                              | -0,34                                                                                | <0.001                       | <0.001                            |
| A_21_P0003604    | XLOC_003522    | -0,49                                                                                                         | -0,46                                                                              | -0,49                                                                                | <0.001                       | <0.001                            |
| A_33_P3423979    | PALLD          | -0,49                                                                                                         | -0,50                                                                              | -0,43                                                                                | <0.001                       | <0.001                            |
| A_23_P140760     | GPR97          | -0,48                                                                                                         | -0,52                                                                              | -0,37                                                                                | 0.001                        | 0.026                             |
| A_33_P3352283    |                | -0,48                                                                                                         | -0,36                                                                              | -0,63                                                                                | 0.049                        | 0.291                             |
| A_33_P3340752    | LOC100130887   | -0,48                                                                                                         | -0,36                                                                              | -0,65                                                                                | <0.001                       | <0.001                            |
| A_23_P128375     | C12orf34       | -0,48                                                                                                         | -0,55                                                                              | -0,35                                                                                | <0.001                       | <0.001                            |

|                |                |       |       |       |        |        |
|----------------|----------------|-------|-------|-------|--------|--------|
| A_33_P3221432  | ZNF284         | -0,48 | -0,25 | -0,77 | <0.001 | <0.001 |
| A_33_P3407880  | ANKRD22        | -0,47 | -0,35 | -0,53 | <0.001 | <0.001 |
| A_33_P3374673  | GNN            | -0,47 | -0,50 | -0,37 | <0.001 | 0.002  |
| A_33_P3321372  | CNTNAP3        | -0,47 | -0,62 | -0,13 | 0.018  | 0.152  |
| A_32_P100683   | TTC28          | -0,46 | -0,35 | -0,53 | 0.001  | 0.014  |
| A_21_P0012967  | XLOC_I2_011891 | -0,46 | -0,52 | -0,44 | 0.007  | 0.084  |
| A_19_P00315524 | MIAT           | -0,46 | -0,30 | -0,35 | 0.001  | 0.020  |
| A_23_P163209   | BCL2L10        | -0,46 | -0,36 | -0,56 | 0.044  | 0.272  |
| A_23_P70794    | RAB23          | -0,46 | -0,35 | -0,64 | 0.001  | 0.013  |
| A_23_P210465   | PI3            | -0,46 | -0,64 | -0,18 | 0.007  | 0.083  |
| A_33_P3333712  | SCYL2          | -0,45 | -0,24 | -0,59 | <0.001 | <0.001 |
| A_33_P3352632  | LOC728147      | -0,45 | -0,41 | -0,43 | <0.001 | <0.001 |
| A_32_P161913   | C1orf70        | -0,45 | -0,18 | -0,62 | 0.031  | 0.222  |
| A_23_P92107    | SLC15A2        | -0,45 | -0,45 | -0,37 | <0.001 | <0.001 |
| A_33_P3276845  | LOC100288018   | -0,45 | -0,20 | -0,62 | 0.003  | 0.040  |
| A_33_P3237634  | TSC22D3        | -0,45 | -0,47 | -0,45 | <0.001 | <0.001 |
| A_24_P931964   | LOC100128816   | -0,45 | -0,37 | -0,45 | <0.001 | <0.001 |
| A_21_P0002189  | XLOC_001406    | -0,45 | -0,50 | -0,45 | <0.001 | 0.008  |
| A_24_P260101   | MME            | -0,45 | -0,43 | -0,43 | 0.002  | 0.028  |
| A_24_P703462   |                | -0,45 | -0,44 | -0,38 | <0.001 | <0.001 |
| A_24_P177553   |                | -0,45 | -0,43 | -0,37 | 0.004  | 0.056  |
| A_21_P0006803  | XLOC_008995    | -0,44 | -0,68 | -0,20 | 0.009  | 0.098  |
| A_33_P3358844  |                | -0,44 | -0,53 | -0,13 | 0.001  | 0.013  |
| A_33_P3275233  | LOC100131792   | -0,44 | -0,46 | -0,51 | <0.001 | 0.001  |
| A_23_P213102   | PALLD          | -0,44 | -0,44 | -0,38 | <0.001 | <0.001 |
| A_24_P353619   | ALPL           | -0,44 | -0,58 | -0,18 | 0.008  | 0.087  |
| A_23_P208747   | PGLYRP1        | -0,44 | -0,40 | -0,48 | 0.006  | 0.074  |
| A_24_P382319   | CEACAM1        | -0,44 | -0,45 | -0,41 | <0.001 | 0.002  |
| A_23_P206293   | GPR114         | -0,44 | -0,46 | -0,41 | <0.001 | 0.005  |
| A_24_P938614   | CDS1           | -0,44 | -0,29 | -0,48 | <0.001 | 0.008  |
| A_24_P407235   | CRY1           | -0,44 | -0,39 | -0,45 | <0.001 | <0.001 |
| A_33_P3415430  | HSPA1B         | -0,44 | -0,47 | -0,41 | <0.001 | <0.001 |
| A_23_P7412     | BTNL8          | -0,43 | -0,57 | -0,25 | 0.029  | 0.211  |
| A_33_P3260317  | NR6A1          | -0,43 | -0,26 | -0,65 | <0.001 | 0.006  |
| A_33_P3861634  | LOC285084      | -0,43 | -0,68 | -0,17 | 0.037  | 0.247  |
| A_23_P4096     | CA4            | -0,43 | -0,39 | -0,40 | 0.019  | 0.161  |
| A_23_P129425   | TSNAXIP1       | -0,43 | -0,51 | -0,25 | 0.001  | 0.016  |
| A_32_P52785    | DAAM2          | -0,43 | -0,35 | -0,42 | 0.009  | 0.095  |
| A_21_P0007561  | XLOC_009764    | -0,43 | -0,26 | -0,42 | 0.015  | 0.139  |
| A_33_P3502037  | CHORDC1        | -0,42 | -0,45 | -0,37 | <0.001 | <0.001 |
| A_33_P3214343  |                | -0,42 | -0,15 | -0,58 | 0.002  | 0.028  |
| A_24_P9671     | DNAJA1         | -0,42 | -0,39 | -0,42 | <0.001 | <0.001 |
| A_33_P3626709  | LOC100129280   | -0,42 | -0,17 | -0,52 | <0.001 | 0.001  |
| A_21_P0000485  | SNORD77        | -0,42 | -0,51 | -0,14 | 0.001  | 0.014  |
| A_33_P3294277  | CYP4F3         | -0,42 | -0,30 | -0,51 | 0.001  | 0.021  |
| A_21_P0000166  | LOC100506012   | -0,42 | -0,49 | -0,36 | 0.001  | 0.021  |
| A_23_P216712   | TRPM6          | -0,41 | -0,35 | -0,54 | 0.019  | 0.161  |
| A_23_P149775   | ARHGAP12       | -0,41 | -0,35 | -0,44 | <0.001 | <0.001 |
| A_23_P368484   | C17orf76       | -0,41 | -0,41 | -0,39 | <0.001 | <0.001 |
| A_23_P258483   | ANKRD55        | -0,41 | 0,08  | -0,85 | <0.001 | 0.009  |

|               |                |       |       |       |        |        |
|---------------|----------------|-------|-------|-------|--------|--------|
| A_23_P209320  | PER2           | -0,41 | -0,40 | -0,40 | <0.001 | <0.001 |
| A_24_P13715   | FBXO22         | -0,41 | -0,04 | -0,58 | 0.002  | 0.026  |
| A_23_P308954  | BHLHB9         | -0,41 | -0,55 | -0,33 | 0.005  | 0.068  |
| A_21_P0009092 | XLOC_011630    | -0,41 | -0,33 | -0,35 | 0.035  | 0.236  |
| A_23_P416305  | RPL27A         | -0,41 | -0,17 | -0,34 | 0.002  | 0.027  |
| A_21_P0007598 | XLOC_009826    | -0,41 | -0,57 | -0,36 | 0.048  | 0.285  |
| A_33_P3424636 |                | -0,41 | -0,39 | -0,27 | 0.043  | 0.269  |
| A_33_P3268507 | CEACAM1        | -0,41 | -0,61 | -0,13 | 0.004  | 0.059  |
| A_33_P3260747 | NHSL2          | -0,41 | -0,41 | -0,38 | <0.001 | <0.001 |
| A_21_P0002284 | XLOC_001649    | -0,40 | -0,30 | -0,59 | 0.043  | 0.268  |
| A_33_P3277110 | SLC5A3         | -0,40 | -0,40 | -0,36 | <0.001 | <0.001 |
| A_33_P3271387 | THAP3          | -0,40 | -0,43 | -0,38 | <0.001 | <0.001 |
| A_33_P3215232 |                | -0,40 | -0,42 | -0,31 | 0.002  | 0.030  |
| A_33_P3337500 |                | -0,40 | -0,35 | -0,40 | 0.012  | 0.116  |
| A_23_P166297  | ABCG1          | -0,40 | -0,37 | -0,45 | <0.001 | 0.001  |
| A_21_P0012036 | XLOC_I2_007706 | -0,40 | -0,27 | -0,39 | 0.008  | 0.092  |
| A_33_P3247678 | LOC100130876   | -0,40 | -0,43 | -0,19 | 0.010  | 0.103  |
| A_21_P0002470 | XLOC_002194    | -0,40 | -0,26 | -0,39 | 0.001  | 0.020  |
| A_23_P80162   | TMPRSS3        | -0,40 | -0,55 | -0,25 | 0.013  | 0.123  |
| A_23_P139198  | LGALS12        | -0,40 | -0,33 | -0,43 | <0.001 | <0.001 |
| A_23_P93727   | SDK1           | -0,40 | -0,41 | -0,30 | 0.001  | 0.014  |
| A_33_P3378680 | ARHGAP26       | -0,40 | -0,38 | -0,29 | 0.003  | 0.041  |
| A_33_P3257678 | HIST2H3A       | -0,39 | -0,32 | -0,46 | <0.001 | 0.001  |
| A_33_P3255914 | MYLIP          | -0,39 | -0,35 | -0,41 | <0.001 | <0.001 |
| A_23_P31816   | DEFA3          | -0,39 | -0,52 | -0,10 | 0.038  | 0.251  |
| A_23_P411162  | PER2           | -0,39 | -0,42 | -0,35 | <0.001 | <0.001 |
| A_32_P183970  | C15orf62       | -0,39 | -0,47 | -0,30 | <0.001 | 0.003  |
| A_21_P0013135 | XLOC_I2_012748 | -0,39 | -0,48 | -0,17 | 0.012  | 0.121  |
| A_21_P0010690 | XLOC_I2_000037 | -0,39 | -0,42 | -0,25 | 0.006  | 0.069  |
| A_33_P3376140 | KCNJ15         | -0,39 | -0,37 | -0,37 | <0.001 | <0.001 |
| A_24_P583040  | C17orf67       | -0,39 | -0,52 | -0,31 | 0.022  | 0.177  |
| A_23_P167061  | PPEF2          | -0,39 | -0,24 | -0,51 | <0.001 | 0.008  |
| A_33_P3273664 | ARSK           | -0,39 | -0,27 | -0,41 | <0.001 | 0.001  |
| A_23_P137931  | ADORA3         | -0,39 | -0,36 | -0,46 | <0.001 | <0.001 |
| A_33_P3309924 | HDAC2          | -0,39 | -0,29 | -0,42 | <0.001 | <0.001 |
| A_21_P0001397 | XLOC_000490    | -0,39 | -0,32 | -0,43 | 0.002  | 0.034  |
| A_23_P348257  | NUAK1          | -0,39 | -0,34 | -0,40 | 0.032  | 0.226  |
| A_24_P297539  | UBE2C          | -0,39 | -0,55 | -0,20 | 0.009  | 0.097  |
| A_33_P3216621 |                | -0,39 | -0,26 | -0,45 | 0.008  | 0.085  |
| A_33_P3392004 | LOC100129785   | -0,39 | -0,41 | -0,25 | 0.003  | 0.041  |
| A_33_P3258339 | C17orf76       | -0,38 | -0,32 | -0,44 | <0.001 | <0.001 |
| A_23_P431933  | CAMKK1         | -0,38 | -0,42 | -0,30 | <0.001 | <0.001 |
| A_21_P0011910 | CHORDC1        | -0,38 | -0,37 | -0,40 | <0.001 | <0.001 |
| A_24_P184799  | COCH           | -0,38 | -0,39 | -0,36 | 0.011  | 0.110  |
| A_33_P3328251 | LOC100288018   | -0,38 | -0,22 | -0,61 | 0.013  | 0.127  |
| A_21_P0007430 | XLOC_009080    | -0,38 | -0,24 | -0,49 | 0.001  | 0.018  |
| A_24_P350437  | THAP2          | -0,38 | -0,27 | -0,47 | <0.001 | <0.001 |
| A_21_P0013834 | CT45A1         | -0,38 | -0,31 | -0,44 | <0.001 | <0.001 |
| A_21_P0007880 | LOC100507195   | -0,38 | -0,20 | -0,53 | 0.006  | 0.071  |
| A_33_P3341916 | C10orf128      | -0,38 | -0,31 | -0,40 | 0.003  | 0.049  |

|               |                |       |       |       |        |        |
|---------------|----------------|-------|-------|-------|--------|--------|
| A_33_P3316978 | RNF207         | -0,38 | -0,57 | -0,31 | 0.001  | 0.022  |
| A_23_P50638   | LRG1           | -0,38 | -0,34 | -0,40 | <0.001 | <0.001 |
| A_24_P85850   | BNIP1          | -0,38 | -0,42 | -0,60 | 0.004  | 0.055  |
| A_23_P325155  | CD200R1        | -0,38 | -0,33 | -0,42 | 0.005  | 0.062  |
| A_33_P3308774 |                | -0,38 | -0,29 | -0,38 | 0.011  | 0.111  |
| A_24_P237270  | ADORA2A        | -0,38 | -0,28 | -0,41 | <0.001 | <0.001 |
| A_23_P303455  | GPR161         | -0,38 | -0,40 | -0,42 | 0.002  | 0.029  |
| A_23_P211878  | FLNB           | -0,38 | -0,40 | -0,31 | <0.001 | <0.001 |
| A_33_P3235034 |                | -0,38 | -0,32 | -0,37 | <0.001 | <0.001 |
| A_23_P30983   | GJB7           | -0,38 | -0,49 | -0,15 | 0.010  | 0.101  |
| A_23_P66767   | GGT6           | -0,38 | -0,35 | -0,34 | 0.023  | 0.181  |
| A_33_P3390758 | HSPA8          | -0,37 | -0,37 | -0,41 | <0.001 | <0.001 |
| A_33_P3270793 | FAM84A         | -0,37 | -0,28 | -0,35 | 0.018  | 0.155  |
| A_23_P17134   | MAL            | -0,37 | -0,32 | -0,36 | 0.009  | 0.100  |
| A_33_P3373598 | TREML2P1       | -0,37 | -0,29 | -0,38 | 0.001  | 0.022  |
| A_23_P89589   | PER1           | -0,37 | -0,33 | -0,46 | <0.001 | 0.004  |
| A_33_P3299761 | KRT23          | -0,37 | -0,29 | -0,38 | <0.001 | 0.006  |
| A_21_P0009485 | XLOC_012688    | -0,37 | -0,17 | -0,34 | 0.022  | 0.178  |
| A_23_P46690   | TMEM81         | -0,37 | -0,29 | -0,47 | <0.001 | <0.001 |
| A_23_P138805  | CHORDC1        | -0,37 | -0,33 | -0,40 | <0.001 | <0.001 |
| A_24_P292929  | CAMKK1         | -0,37 | -0,32 | -0,34 | <0.001 | <0.001 |
| A_23_P121716  | ANXA3          | -0,37 | -0,41 | -0,20 | 0.029  | 0.212  |
| A_21_P0005807 | XLOC_007020    | -0,37 | -0,23 | -0,24 | 0.001  | 0.021  |
| A_33_P3287472 | PPP1R27        | -0,37 | -0,23 | -0,35 | 0.008  | 0.093  |
| A_33_P3373165 | DUX4L4         | -0,36 | -0,27 | -0,34 | 0.024  | 0.185  |
| A_21_P0009510 | XLOC_012735    | -0,36 | -0,28 | -0,39 | 0.001  | 0.015  |
| A_33_P3405728 | PKP2           | -0,36 | -0,26 | -0,42 | <0.001 | <0.001 |
| A_23_P356554  | BAG2           | -0,36 | -0,40 | -0,35 | <0.001 | <0.001 |
| A_23_P71727   | CKS2           | -0,36 | -0,33 | -0,40 | <0.001 | <0.001 |
| A_33_P3285018 |                | -0,36 | -0,21 | -0,41 | 0.013  | 0.123  |
| A_23_P388301  | PRR14L         | -0,36 | -0,34 | -0,33 | 0.022  | 0.177  |
| A_21_P0009429 | XLOC_012692    | -0,36 | -0,18 | -0,46 | 0.003  | 0.045  |
| A_23_P311144  | CCDC138        | -0,36 | -0,26 | -0,44 | 0.005  | 0.062  |
| A_23_P28334   | IL18RAP        | -0,36 | -0,40 | -0,27 | 0.044  | 0.274  |
| A_33_P3266863 | TMEM53         | -0,36 | -0,43 | -0,24 | 0.005  | 0.062  |
| A_21_P0002596 | XLOC_001496    | -0,36 | -0,36 | -0,34 | <0.001 | <0.001 |
| A_33_P3254375 | LOC730651      | -0,36 | -0,25 | -0,46 | <0.001 | 0.001  |
| A_24_P393470  | MEF2BNB        | -0,36 | -0,33 | -0,34 | <0.001 | <0.001 |
| A_33_P3265222 | KIAA1324       | -0,36 | -0,34 | -0,14 | 0.025  | 0.193  |
| A_33_P3251685 | PDP2           | -0,36 | -0,45 | -0,32 | 0.011  | 0.108  |
| A_21_P0005590 | XLOC_006319    | -0,36 | -0,29 | -0,35 | 0.011  | 0.111  |
| A_23_P433798  | PODNL1         | -0,36 | -0,32 | -0,36 | 0.002  | 0.035  |
| A_23_P34396   | C1orf63        | -0,36 | -0,35 | -0,36 | <0.001 | <0.001 |
| A_32_P71788   | FKBP4          | -0,36 | -0,36 | -0,38 | <0.001 | <0.001 |
| A_33_P3256793 | KIAA1324       | -0,36 | -0,40 | -0,20 | 0.006  | 0.069  |
| A_23_P217319  | FGF13          | -0,36 | -0,38 | -0,27 | 0.005  | 0.064  |
| A_33_P3400763 | PLIN4          | -0,36 | -0,34 | -0,32 | 0.002  | 0.033  |
| A_21_P0013664 | XLOC_I2_015239 | -0,36 | -0,26 | -0,28 | 0.001  | 0.012  |
| A_21_P0002274 | XLOC_001637    | -0,36 | -0,15 | -0,44 | 0.005  | 0.063  |
| A_23_P99693   | ZBTB1          | -0,36 | -0,34 | -0,30 | <0.001 | <0.001 |

|                |                |       |       |       |        |        |
|----------------|----------------|-------|-------|-------|--------|--------|
| A_21_P0003042  | XLOC_002872    | -0,36 | -0,33 | -0,34 | <0.001 | <0.001 |
| A_23_P77415    | OSGIN1         | -0,36 | -0,39 | -0,35 | <0.001 | <0.001 |
| A_33_P3330911  | BCAS1          | -0,36 | -0,26 | -0,30 | 0.022  | 0.174  |
| A_23_P12643    | AS3MT          | -0,36 | -0,31 | -0,35 | 0.003  | 0.046  |
| A_23_P212258   | KNG1           | -0,36 | -0,23 | -0,48 | 0.010  | 0.102  |
| A_23_P16817    | CLK1           | -0,36 | -0,32 | -0,35 | <0.001 | <0.001 |
| A_23_P407654   | C7orf51        | -0,36 | -0,32 | -0,26 | 0.032  | 0.222  |
| A_33_P3282374  | TIAM2          | -0,36 | -0,33 | -0,27 | <0.001 | 0.003  |
| A_23_P137665   | CHI3L1         | -0,36 | -0,50 | -0,11 | 0.025  | 0.190  |
| A_21_P0007009  | XLOC_008895    | -0,35 | -0,49 | -0,33 | 0.027  | 0.199  |
| A_21_P0000372  | SNORD45C       | -0,35 | -0,22 | -0,35 | 0.005  | 0.063  |
| A_21_P0000663  | LOC644242      | -0,35 | -0,30 | -0,39 | <0.001 | <0.001 |
| A_24_P55225    | RSPH9          | -0,35 | -0,41 | -0,27 | <0.001 | <0.001 |
| A_23_P67932    | CXCR1          | -0,35 | -0,43 | -0,21 | 0.005  | 0.062  |
| A_21_P0004449  | XLOC_005026    | -0,35 | -0,13 | -0,44 | 0.009  | 0.094  |
| A_24_P48069    | DOK4           | -0,35 | -0,43 | -0,21 | 0.012  | 0.117  |
| A_23_P205867   | NR2E3          | -0,35 | 0,01  | -0,58 | 0.009  | 0.099  |
| A_33_P3415888  | TEPP           | -0,35 | -0,27 | -0,24 | 0.005  | 0.066  |
| A_21_P0000622  | LOC100131176   | -0,35 | -0,29 | -0,31 | 0.017  | 0.152  |
| A_33_P3210278  | SYNE2          | -0,35 | -0,46 | -0,16 | 0.033  | 0.228  |
| A_19_P00322910 | TWIST2         | -0,35 | -0,30 | -0,59 | 0.046  | 0.281  |
| A_21_P0007539  | XLOC_009705    | -0,35 | -0,28 | -0,38 | <0.001 | <0.001 |
| A_33_P3212456  | STX1A          | -0,35 | -0,28 | -0,27 | 0.011  | 0.111  |
| A_33_P3356696  | LOC100134409   | -0,35 | -0,12 | -0,28 | 0.013  | 0.123  |
| A_33_P3353242  | HSPB1          | -0,35 | -0,52 | -0,29 | <0.001 | 0.001  |
| A_21_P0003178  | XLOC_003262    | -0,34 | -0,36 | -0,29 | 0.044  | 0.272  |
| A_21_P0009844  | LOC100130157   | -0,34 | -0,31 | -0,38 | <0.001 | <0.001 |
| A_23_P34676    | CD247          | -0,34 | -0,45 | -0,16 | 0.018  | 0.155  |
| A_24_P68311    | SYNE2          | -0,34 | -0,39 | -0,30 | 0.007  | 0.084  |
| A_32_P776626   | RGPD1          | -0,34 | -0,44 | -0,09 | 0.003  | 0.039  |
| A_24_P396167   | CTSW           | -0,34 | -0,26 | -0,49 | 0.007  | 0.083  |
| A_23_P146444   | CORO2A         | -0,34 | -0,27 | -0,36 | <0.001 | <0.001 |
| A_23_P153616   | MADCAM1        | -0,34 | -0,39 | -0,20 | 0.008  | 0.086  |
| A_23_P110712   | DUSP1          | -0,34 | -0,40 | -0,28 | <0.001 | <0.001 |
| A_33_P3209703  |                | -0,34 | 0,07  | -0,57 | 0.023  | 0.181  |
| A_24_P22050    | RAB20          | -0,34 | -0,33 | -0,39 | <0.001 | <0.001 |
| A_33_P3267532  | KCNJ15         | -0,34 | -0,28 | -0,34 | <0.001 | <0.001 |
| A_23_P108082   | CREB3L3        | -0,34 | -0,44 | 0,03  | 0.003  | 0.041  |
| A_23_P137697   | SELP           | -0,34 | -0,25 | -0,36 | 0.003  | 0.044  |
| A_21_P0009115  | XLOC_011821    | -0,34 | -0,30 | -0,39 | 0.004  | 0.051  |
| A_32_P1173     | MB21D1         | -0,34 | -0,33 | -0,34 | <0.001 | <0.001 |
| A_23_P363174   | HIST1H2AL      | -0,34 | -0,33 | -0,36 | <0.001 | 0.003  |
| A_32_P126609   | SMC5           | -0,34 | -0,51 | -0,22 | 0.026  | 0.196  |
| A_21_P0005139  | XLOC_005492    | -0,34 | -0,37 | -0,26 | 0.002  | 0.029  |
| A_19_P00329048 | XLOC_I2_014585 | -0,34 | -0,31 | -0,22 | 0.003  | 0.042  |
| A_23_P3643     | DNASE1L2       | -0,34 | -0,24 | -0,40 | <0.001 | <0.001 |
| A_24_P354724   | TAGAP          | -0,34 | -0,27 | -0,40 | <0.001 | <0.001 |
| A_21_P0010021  | XLOC_013688    | -0,34 | -0,28 | -0,33 | <0.001 | <0.001 |
| A_33_P3226995  | CD7            | -0,34 | -0,26 | -0,37 | <0.001 | 0.007  |
| A_24_P336474   | NHLH1          | -0,34 | -0,41 | -0,30 | 0.007  | 0.083  |



|                |                |       |       |       |        |        |
|----------------|----------------|-------|-------|-------|--------|--------|
| A_23_P26386    | TPPP3          | -0,34 | -0,41 | -0,25 | <0.001 | <0.001 |
| A_23_P62679    |                | -0,34 | -0,15 | -0,31 | 0.003  | 0.042  |
| A_21_P0005518  | XLOC_006529    | -0,34 | -0,04 | -0,62 | 0.028  | 0.207  |
| A_23_P35796    | PPP2R5B        | -0,34 | -0,33 | -0,33 | <0.001 | <0.001 |
| A_33_P3340264  | OTOG           | -0,34 | -0,28 | -0,39 | 0.028  | 0.204  |
| A_19_P00808588 | GBP1P1         | -0,33 | -0,31 | -0,39 | 0.017  | 0.150  |
| A_19_P00319093 | XLOC_010204    | -0,33 | -0,20 | -0,52 | 0.006  | 0.071  |
| A_21_P0010839  | XLOC_I2_001683 | -0,33 | -0,31 | -0,19 | 0.016  | 0.143  |
| A_24_P389285   | C7orf54        | -0,33 | -0,32 | -0,41 | 0.023  | 0.181  |
| A_23_P111132   | HSPA1A         | -0,33 | -0,36 | -0,33 | <0.001 | <0.001 |
| A_33_P3256778  | CNTF           | -0,33 | -0,08 | -0,50 | 0.004  | 0.051  |
| A_23_P58321    | CCNA2          | -0,33 | -0,31 | -0,32 | <0.001 | <0.001 |
| A_23_P252236   | KLKB1          | -0,33 | -0,12 | -0,43 | 0.014  | 0.132  |
| A_21_P0008500  | XLOC_011151    | -0,33 | -0,09 | -0,52 | 0.011  | 0.110  |
| A_21_P0002177  | XLOC_001363    | -0,33 | -0,15 | -0,29 | 0.029  | 0.211  |
| A_33_P3214550  | CXCR2          | -0,33 | -0,39 | -0,23 | 0.001  | 0.011  |
| A_33_P3360814  | NFE4           | -0,33 | -0,21 | -0,37 | 0.013  | 0.126  |
| A_33_P3294089  |                | -0,33 | -0,22 | -0,39 | <0.001 | 0.001  |
| A_33_P3400708  | BNIP1          | -0,33 | -0,43 | -0,18 | 0.001  | 0.016  |
| A_33_P3280009  |                | -0,33 | -0,29 | -0,37 | <0.001 | 0.001  |
| A_23_P155052   | APOL6          | -0,33 | -0,11 | -0,48 | 0.003  | 0.045  |
| A_21_P0007530  | XLOC_009681    | -0,33 | -0,38 | -0,29 | <0.001 | <0.001 |
| A_24_P945113   | ACVRL1         | -0,33 | -0,32 | -0,34 | <0.001 | <0.001 |
| A_33_P3342569  |                | -0,33 | -0,12 | -0,47 | 0.011  | 0.111  |
| A_33_P3323862  | LOC388210      | -0,33 | -0,42 | -0,12 | 0.012  | 0.117  |
| A_23_P115482   | UBE2T          | -0,33 | -0,26 | -0,37 | <0.001 | <0.001 |
| A_23_P208880   | UHRF1          | -0,33 | -0,23 | -0,36 | 0.001  | 0.015  |
| A_21_P0006664  | XLOC_008436    | -0,33 | -0,49 | -0,04 | 0.039  | 0.253  |
| A_21_P0013649  | XLOC_I2_015209 | -0,33 | -0,09 | -0,39 | 0.039  | 0.253  |
| A_32_P220463   | FBLL1          | -0,33 | -0,24 | -0,37 | <0.001 | 0.010  |
| A_23_P5441     | ABCB6          | -0,33 | -0,36 | -0,23 | <0.001 | <0.001 |
| A_21_P0005369  | XLOC_006035    | -0,33 | -0,24 | -0,47 | 0.020  | 0.163  |
| A_23_P385322   | STAMBPL1       | -0,33 | -0,15 | -0,39 | 0.004  | 0.059  |
| A_21_P0013249  | XLOC_I2_013485 | -0,33 | -0,37 | -0,20 | 0.006  | 0.071  |
| A_24_P331704   | KRT80          | -0,33 | -0,15 | -0,57 | 0.001  | 0.018  |
| A_21_P0006667  | XLOC_008441    | -0,33 | -0,38 | -0,33 | 0.002  | 0.036  |
| A_23_P415015   | ATL2           | -0,33 | -0,23 | -0,45 | 0.007  | 0.081  |
| A_21_P0013976  | LOC100130476   | -0,32 | -0,26 | -0,26 | 0.025  | 0.188  |
| A_24_P177604   | PPP1R3F        | -0,32 | -0,32 | -0,30 | <0.001 | <0.001 |
| A_33_P3407057  |                | -0,32 | -0,09 | -0,48 | 0.002  | 0.028  |
| A_33_P3319622  |                | -0,32 | -0,11 | -0,23 | 0.020  | 0.166  |
| A_21_P0014338  | LOC100506183   | -0,32 | -0,16 | -0,41 | 0.019  | 0.158  |
| A_21_P0002261  | XLOC_001595    | -0,32 | -0,34 | -0,34 | <0.001 | <0.001 |
| A_19_P00318443 | XLOC_006507    | -0,32 | -0,40 | -0,28 | 0.018  | 0.155  |
| A_33_P3221960  | IL18RAP        | -0,32 | -0,31 | -0,29 | 0.027  | 0.200  |
| A_21_P0010978  | NEAT1          | -0,32 | -0,32 | -0,25 | 0.003  | 0.044  |
| A_24_P930926   | BAG4           | -0,32 | -0,28 | -0,30 | 0.011  | 0.108  |
| A_33_P3359763  | FLCN           | -0,32 | -0,39 | -0,21 | 0.004  | 0.054  |
| A_21_P0004400  | XLOC_004839    | -0,32 | -0,32 | -0,33 | <0.001 | 0.010  |
| A_33_P3685572  | LOC157562      | -0,32 | -0,34 | -0,29 | <0.001 | <0.001 |

|               |                |       |       |       |        |        |
|---------------|----------------|-------|-------|-------|--------|--------|
| A_21_P0011011 | XLOC_I2_002659 | -0,32 | -0,23 | -0,36 | <0.001 | <0.001 |
| A_33_P3535972 | CELF4          | -0,32 | -0,07 | -0,39 | 0.005  | 0.069  |
| A_33_P3370094 | MME            | -0,32 | -0,28 | -0,29 | 0.027  | 0.199  |
| A_23_P149545  | HIST2H2BE      | -0,32 | -0,23 | -0,42 | 0.008  | 0.087  |
| A_33_P3274710 |                | -0,32 | -0,33 | -0,23 | 0.010  | 0.102  |
| A_21_P0012342 | PI4KA          | -0,32 | -0,28 | -0,36 | 0.001  | 0.017  |
| A_33_P3331641 | ZNF503-AS2     | -0,32 | -0,33 | -0,30 | <0.001 | <0.001 |
| A_33_P3222524 |                | -0,32 | -0,38 | -0,28 | 0.018  | 0.155  |
| A_23_P334727  | NRG4           | -0,32 | -0,19 | -0,43 | 0.002  | 0.036  |
| A_23_P420196  | SOCS1          | -0,32 | -0,31 | -0,31 | <0.001 | <0.001 |
| A_21_P0013206 | LOC100287294   | -0,32 | -0,43 | -0,03 | 0.045  | 0.277  |
| A_21_P0005219 | XLOC_006035    | -0,32 | -0,16 | -0,37 | 0.012  | 0.120  |
| A_23_P94840   | DYNLRB2        | -0,32 | -0,30 | -0,29 | 0.006  | 0.071  |
| A_24_P171058  | TMEM64         | -0,32 | -0,27 | -0,40 | <0.001 | <0.001 |
| A_23_P390443  | SHISA7         | -0,32 | -0,41 | -0,27 | 0.037  | 0.245  |
| A_33_P3277679 |                | -0,32 | -0,02 | -0,48 | 0.021  | 0.169  |
| A_33_P3236222 | LOC391766      | -0,31 | -0,10 | -0,43 | 0.019  | 0.162  |
| A_21_P0006411 | XLOC_007917    | -0,31 | -0,49 | -0,07 | 0.021  | 0.171  |
| A_33_P3413997 |                | -0,31 | -0,35 | -0,26 | 0.001  | 0.015  |
| A_23_P216307  | RUNX1T1        | -0,31 | -0,40 | -0,30 | 0.027  | 0.201  |
| A_33_P3330179 | LOC100131372   | -0,31 | -0,34 | -0,24 | 0.026  | 0.195  |
| A_33_P3311353 | C15orf55       | -0,31 | -0,17 | -0,23 | 0.004  | 0.051  |
| A_33_P3276585 | IFT74          | -0,31 | -0,18 | -0,49 | 0.022  | 0.174  |
| A_23_P65918   | ITPKA          | -0,31 | -0,34 | -0,29 | <0.001 | <0.001 |
| A_23_P90062   | DNAJB1         | -0,31 | -0,35 | -0,26 | <0.001 | <0.001 |
| A_24_P380679  | C7orf53        | -0,31 | -0,26 | -0,34 | <0.001 | <0.001 |
| A_24_P49997   | PFN3           | -0,31 | -0,18 | -0,40 | 0.003  | 0.042  |
| A_24_P358425  | CCDC75         | -0,31 | -0,21 | -0,38 | <0.001 | <0.001 |
| A_33_P3369371 | GPX3           | -0,31 | -0,28 | -0,45 | 0.009  | 0.096  |
| A_32_P41026   | SC5DL          | -0,31 | -0,32 | -0,30 | <0.001 | 0.006  |
| A_21_P0012185 | XLOC_I2_009139 | -0,31 | -0,30 | -0,35 | <0.001 | 0.003  |
| A_33_P3316403 |                | -0,31 | -0,04 | -0,44 | 0.001  | 0.020  |
| A_32_P176018  | ACTL8          | -0,31 | -0,19 | -0,34 | 0.027  | 0.203  |
| A_21_P0000820 | LOC100506668   | -0,31 | -0,38 | -0,33 | 0.015  | 0.139  |
| A_21_P0014670 | LOC100505606   | -0,31 | -0,17 | -0,41 | <0.001 | 0.001  |
| A_33_P3393010 | PKDCC          | -0,31 | -0,52 | 0,00  | 0.045  | 0.275  |
| A_21_P0012496 | XLOC_I2_009820 | -0,31 | -0,10 | -0,47 | 0.001  | 0.020  |
| A_33_P3208995 |                | -0,31 | -0,09 | -0,41 | 0.030  | 0.216  |
| A_33_P3222852 |                | -0,31 | -0,37 | -0,26 | 0.020  | 0.165  |
| A_21_P0014580 | LOC100507195   | -0,31 | -0,06 | -0,54 | 0.033  | 0.229  |
| A_33_P3239347 | NKX3-1         | -0,31 | -0,32 | -0,18 | 0.032  | 0.222  |
| A_21_P0009958 | XLOC_013531    | -0,31 | -0,37 | -0,27 | 0.016  | 0.145  |
| A_23_P167328  | CD38           | -0,31 | -0,28 | -0,35 | <0.001 | <0.001 |
| A_23_P28246   | SLC23A3        | -0,31 | -0,26 | -0,35 | <0.001 | <0.001 |
| A_32_P199252  | HSP90AA1       | -0,31 | -0,33 | -0,31 | <0.001 | <0.001 |
| A_24_P73535   | C14orf119      | -0,31 | -0,26 | -0,25 | 0.015  | 0.137  |
| A_21_P0010951 | XLOC_I2_002033 | -0,31 | -0,20 | -0,32 | <0.001 | 0.010  |
| A_32_P119248  | FOXD4          | -0,31 | -0,29 | -0,20 | <0.001 | 0.003  |
| A_33_P3356070 | LPIN1          | -0,31 | -0,26 | -0,37 | 0.004  | 0.060  |
| A_33_P3273436 | GALM           | -0,31 | -0,29 | -0,29 | <0.001 | <0.001 |

|                |                |       |       |       |        |        |
|----------------|----------------|-------|-------|-------|--------|--------|
| A_33_P3331996  | LOC100509860   | -0,31 | -0,17 | -0,36 | 0.005  | 0.063  |
| A_23_P114740   | CFH            | -0,31 | -0,58 | 0,06  | 0.028  | 0.207  |
| A_23_P128503   | IL26           | -0,31 | -0,30 | -0,21 | 0.007  | 0.083  |
| A_23_P429491   | C11orf82       | -0,31 | -0,27 | -0,34 | <0.001 | <0.001 |
| A_33_P3256620  |                | -0,31 | -0,39 | -0,20 | 0.016  | 0.143  |
| A_33_P3338071  |                | -0,31 | -0,31 | -0,25 | 0.001  | 0.020  |
| A_23_P19134    | GPR98          | -0,31 | -0,38 | -0,22 | 0.012  | 0.120  |
| A_23_P37068    | TRAF3          | -0,31 | -0,34 | -0,21 | 0.012  | 0.120  |
| A_33_P3614398  | LOC283516      | -0,30 | -0,20 | -0,23 | 0.046  | 0.279  |
| A_33_P3304081  |                | -0,30 | -0,28 | -0,28 | <0.001 | <0.001 |
| A_21_P0003908  | XLOC_004165    | -0,30 | -0,43 | -0,28 | 0.006  | 0.069  |
| A_21_P0007574  | XLOC_009790    | -0,30 | -0,14 | -0,38 | 0.025  | 0.193  |
| A_21_P0008117  | XLOC_010496    | -0,30 | -0,29 | -0,15 | 0.001  | 0.015  |
| A_33_P3312217  | LOC729706      | -0,30 | -0,18 | -0,38 | 0.012  | 0.114  |
| A_33_P3372376  |                | -0,30 | -0,27 | -0,30 | 0.012  | 0.119  |
| A_33_P3257503  | LOC387647      | -0,30 | -0,32 | -0,26 | <0.001 | <0.001 |
| A_32_P331052   | C20orf151      | -0,30 | -0,27 | -0,36 | 0.023  | 0.180  |
| A_21_P0002083  | XLOC_002237    | -0,30 | -0,18 | -0,43 | 0.003  | 0.048  |
| A_21_P0012525  | XLOC_I2_010061 | -0,30 | -0,23 | -0,37 | 0.037  | 0.244  |
| A_33_P3332135  | PHOSPHO1       | -0,30 | -0,35 | -0,17 | 0.006  | 0.074  |
| A_33_P3417740  |                | -0,30 | -0,15 | -0,42 | 0.020  | 0.165  |
| A_21_P0014588  | LOC100507196   | -0,30 | -0,35 | -0,22 | 0.011  | 0.109  |
| A_33_P3520693  | LOC646903      | -0,30 | -0,29 | -0,26 | 0.008  | 0.085  |
| A_24_P13381    | TRPV4          | -0,30 | -0,32 | -0,25 | <0.001 | <0.001 |
| A_19_P00322088 | LOC388210      | -0,30 | -0,46 | -0,07 | 0.046  | 0.281  |
| A_33_P3218490  | LOC100128226   | -0,30 | -0,51 | -0,12 | 0.047  | 0.282  |
| A_21_P0002225  | XLOC_001496    | -0,30 | -0,28 | -0,29 | <0.001 | <0.001 |
| A_21_P0011469  | LOC390705      | -0,30 | -0,31 | -0,32 | 0.031  | 0.220  |
| A_21_P0005162  | XLOC_005681    | -0,30 | -0,30 | -0,28 | <0.001 | <0.001 |
| A_24_P349965   | TCF19          | -0,30 | -0,23 | -0,40 | 0.044  | 0.272  |
| A_33_P3216714  | DNAJC6         | -0,30 | -0,29 | -0,18 | 0.003  | 0.046  |
| A_33_P3211513  | CLK1           | -0,30 | -0,27 | -0,29 | <0.001 | <0.001 |
| A_33_P3333327  |                | -0,30 | -0,25 | -0,26 | 0.001  | 0.021  |
| A_21_P0010365  | XLOC_014265    | -0,30 | -0,24 | -0,35 | 0.019  | 0.161  |
| A_24_P37264    | RNF144A        | -0,30 | -0,38 | -0,22 | 0.021  | 0.168  |
| A_23_P259863   | CD177          | -0,30 | -0,18 | -0,35 | 0.010  | 0.105  |
| A_32_P86763    | TGM2           | -0,30 | -0,33 | -0,25 | 0.015  | 0.138  |
| A_23_P44363    | CASKIN2        | -0,30 | -0,58 | 0,04  | 0.028  | 0.206  |
| A_23_P207154   | CSH2           | -0,30 | -0,31 | -0,15 | 0.048  | 0.288  |
| A_21_P0005438  | XLOC_006277    | -0,30 | -0,26 | -0,14 | 0.042  | 0.267  |
| A_23_P361333   | C3orf20        | -0,30 | -0,34 | -0,32 | <0.001 | 0.011  |
| A_21_P0011789  | XLOC_I2_007176 | -0,30 | -0,12 | -0,41 | 0.001  | 0.021  |
| A_33_P3334047  |                | -0,30 | -0,36 | -0,21 | <0.001 | <0.001 |
| A_24_P345846   | ANTXR2         | -0,30 | -0,22 | -0,29 | <0.001 | <0.001 |
| A_32_P212058   | CEP19          | -0,30 | -0,18 | -0,35 | <0.001 | 0.004  |
| A_33_P3387856  | CENPN          | -0,30 | -0,20 | -0,29 | 0.024  | 0.184  |
| A_24_P62659    | TSPAN2         | -0,30 | -0,27 | -0,27 | 0.010  | 0.102  |
| A_21_P0007521  | XLOC_009643    | -0,30 | -0,17 | -0,43 | 0.023  | 0.180  |
| A_21_P0008538  | XLOC_011047    | -0,29 | -0,08 | -0,44 | 0.048  | 0.286  |
| A_24_P409824   |                | -0,29 | -0,35 | -0,24 | 0.037  | 0.245  |

|               |                |       |       |       |        |        |
|---------------|----------------|-------|-------|-------|--------|--------|
| A_23_P70007   | HMMR           | -0,29 | -0,20 | -0,38 | 0.050  | 0.292  |
| A_23_P102890  | MRPS6          | -0,29 | -0,30 | -0,26 | <0.001 | <0.001 |
| A_21_P0003302 | XLOC_003284    | -0,29 | -0,27 | -0,30 | 0.025  | 0.193  |
| A_33_P3372647 |                | -0,29 | -0,36 | -0,23 | 0.004  | 0.052  |
| A_33_P3312209 |                | -0,29 | -0,12 | -0,42 | 0.034  | 0.234  |
| A_21_P0014609 | LOC100506852   | -0,29 | -0,38 | -0,25 | 0.037  | 0.245  |
| A_23_P342709  | FBXO15         | -0,29 | -0,23 | -0,35 | 0.041  | 0.260  |
| A_33_P3787635 | LOC440600      | -0,29 | -0,34 | -0,20 | 0.011  | 0.111  |
| A_33_P3420900 | PATE2          | -0,29 | -0,25 | -0,27 | 0.002  | 0.032  |
| A_21_P0001485 | XLOC_000757    | -0,29 | -0,24 | -0,26 | 0.011  | 0.114  |
| A_33_P3551349 | LOC439911      | -0,29 | -0,27 | -0,32 | <0.001 | <0.001 |
| A_23_P143845  | TIPARP         | -0,29 | -0,26 | -0,33 | <0.001 | <0.001 |
| A_33_P3383351 | COL5A1         | -0,29 | -0,47 | 0,00  | 0.034  | 0.235  |
| A_33_P3408949 | LOXHD1         | -0,29 | -0,45 | -0,21 | 0.006  | 0.070  |
| A_21_P0013484 | XLOC_I2_014217 | -0,29 | -0,23 | -0,24 | 0.024  | 0.188  |
| A_21_P0000311 | SNORA14A       | -0,29 | -0,37 | -0,23 | <0.001 | <0.001 |
| A_33_P3282075 | SP6            | -0,29 | -0,24 | -0,39 | 0.024  | 0.187  |
| A_32_P170547  | CT45A5         | -0,29 | -0,19 | -0,31 | 0.010  | 0.103  |
| A_32_P150735  |                | -0,29 | -0,27 | -0,31 | <0.001 | <0.001 |
| A_33_P3408577 | POM121L10P     | -0,29 | -0,24 | -0,31 | 0.029  | 0.211  |
| A_21_P0008911 | XLOC_011670    | -0,29 | -0,29 | -0,24 | 0.008  | 0.087  |
| A_23_P4133    | AOC2           | -0,29 | -0,28 | -0,16 | 0.027  | 0.203  |
| A_33_P3306715 | C6orf132       | -0,29 | -0,25 | -0,27 | 0.039  | 0.253  |
| A_23_P82929   | NOV            | -0,29 | -0,26 | -0,23 | 0.001  | 0.016  |
| A_33_P3263432 | ITGA10         | -0,29 | -0,30 | -0,29 | <0.001 | <0.001 |
| A_21_P0011722 | XLOC_I2_006926 | -0,29 | -0,23 | -0,24 | 0.012  | 0.116  |
| A_23_P42897   | MGAM           | -0,29 | -0,14 | -0,39 | 0.001  | 0.021  |
| A_32_P21246   | HCG27          | -0,29 | -0,26 | -0,32 | <0.001 | <0.001 |
| A_24_P336759  | MCL1           | -0,29 | -0,32 | -0,25 | <0.001 | <0.001 |
| A_21_P0012989 | XLOC_I2_012054 | -0,29 | -0,17 | -0,43 | 0.045  | 0.277  |
| A_23_P200801  | PDE4DIP        | -0,29 | -0,25 | -0,32 | <0.001 | <0.001 |
| A_33_P3255075 | CASP10         | -0,29 | -0,22 | -0,34 | 0.023  | 0.181  |
| A_33_P3336113 | TIGD3          | -0,29 | -0,35 | -0,21 | <0.001 | <0.001 |
| A_33_P3395947 | IL4R           | -0,29 | -0,15 | -0,28 | <0.001 | 0.009  |
| A_32_P466877  | C3orf45        | -0,29 | -0,26 | -0,17 | 0.001  | 0.020  |
| A_33_P3889862 | LOC151475      | -0,29 | -0,20 | -0,31 | <0.001 | 0.007  |
| A_23_P301328  | PDXK           | -0,29 | -0,20 | -0,38 | <0.001 | <0.001 |
| A_21_P0005240 | XLOC_006153    | -0,29 | -0,25 | -0,26 | <0.001 | <0.001 |
| A_21_P0004308 | XLOC_004584    | -0,29 | -0,35 | -0,12 | 0.001  | 0.020  |
| A_33_P3367596 | CLCN4          | -0,29 | -0,10 | -0,49 | 0.006  | 0.077  |
| A_21_P0004141 | XLOC_004882    | -0,29 | -0,22 | -0,26 | 0.037  | 0.246  |
| A_33_P3242965 | ATAD3C         | -0,29 | -0,34 | -0,17 | 0.005  | 0.061  |
| A_23_P370682  | BATF2          | -0,29 | -0,28 | -0,27 | <0.001 | <0.001 |
| A_33_P3419321 | CHD5           | -0,29 | -0,29 | -0,11 | 0.030  | 0.216  |
| A_23_P166306  | CBS            | -0,29 | -0,43 | -0,08 | 0.031  | 0.219  |
| A_21_P0012444 | XLOC_I2_010239 | -0,29 | -0,38 | -0,23 | 0.015  | 0.136  |
| A_33_P3251796 | PDSS1          | -0,28 | -0,23 | -0,33 | <0.001 | <0.001 |
| A_33_P3243649 | LOC100131831   | -0,28 | -0,36 | -0,12 | 0.015  | 0.136  |
| A_21_P0000576 | LOC100294362   | -0,28 | -0,26 | -0,27 | 0.012  | 0.117  |
| A_33_P3329793 | AFG3L1P        | -0,28 | -0,37 | -0,22 | <0.001 | <0.001 |

|               |              |       |       |       |        |        |
|---------------|--------------|-------|-------|-------|--------|--------|
| A_23_P389897  | NGFR         | -0,28 | -0,26 | -0,37 | 0.022  | 0.174  |
| A_23_P408094  | MXD1         | -0,28 | -0,26 | -0,24 | <0.001 | 0.003  |
| A_33_P3318237 | PPP2R5B      | -0,28 | -0,27 | -0,28 | <0.001 | <0.001 |
| A_33_P3282733 | LOC100131395 | -0,28 | -0,23 | -0,36 | 0.024  | 0.184  |
| A_21_P0001568 | LOC440600    | -0,28 | -0,53 | 0,04  | 0.009  | 0.100  |
| A_21_P0006980 | XLOC_008760  | -0,28 | -0,43 | -0,23 | 0.017  | 0.147  |
| A_23_P71946   | BSPRY        | -0,28 | -0,29 | -0,30 | 0.039  | 0.254  |
| A_33_P3210492 | C1QTNF4      | -0,28 | -0,19 | -0,30 | 0.007  | 0.078  |
| A_33_P3290577 | MS4A14       | -0,28 | -0,30 | -0,26 | <0.001 | <0.001 |
| A_21_P0006004 | XLOC_007325  | -0,28 | -0,33 | -0,16 | 0.009  | 0.097  |
| A_23_P78248   | KRT23        | -0,28 | -0,25 | -0,27 | 0.001  | 0.025  |
| A_32_P112894  | FAM76A       | -0,28 | -0,14 | -0,34 | 0.046  | 0.278  |
| A_21_P0009501 | LOC339298    | -0,28 | -0,44 | -0,26 | 0.008  | 0.092  |
| A_21_P0003413 | XLOC_003726  | -0,28 | -0,21 | -0,51 | 0.044  | 0.273  |
| A_21_P0007577 | XLOC_009797  | -0,28 | -0,27 | -0,29 | <0.001 | 0.003  |
| A_24_P165864  | P2RY14       | -0,28 | -0,29 | -0,23 | 0.002  | 0.028  |
| A_33_P3237215 | FBXO24       | -0,28 | -0,28 | -0,20 | 0.024  | 0.185  |
| A_21_P0008248 | XLOC_010556  | -0,28 | -0,22 | -0,35 | 0.011  | 0.112  |
| A_23_P337642  | ATP2B3       | -0,28 | -0,27 | -0,20 | 0.021  | 0.169  |
| A_21_P0010509 | LOC100133612 | -0,28 | -0,30 | -0,26 | 0.005  | 0.064  |
| A_33_P3322450 | RAB3IP       | -0,28 | -0,26 | -0,29 | 0.003  | 0.046  |
| A_23_P162874  | HSP90AA1     | -0,28 | -0,25 | -0,31 | <0.001 | <0.001 |
| A_21_P0000313 | SNORA15      | -0,28 | -0,02 | -0,40 | 0.002  | 0.026  |
| A_21_P0009701 | XLOC_013027  | -0,28 | -0,44 | 0,00  | 0.031  | 0.221  |
| A_21_P0003759 | XLOC_004053  | -0,28 | -0,22 | -0,35 | 0.010  | 0.103  |
| A_21_P0006269 | XLOC_007697  | -0,28 | -0,25 | -0,16 | 0.003  | 0.039  |
| A_24_P80776   | C6orf228     | -0,28 | -0,18 | -0,37 | <0.001 | 0.008  |
| A_33_P3254141 | LOC285696    | -0,28 | -0,26 | -0,20 | 0.009  | 0.097  |
| A_33_P3414062 | LOC729968    | -0,28 | -0,39 | -0,04 | 0.021  | 0.173  |
| A_21_P0014556 | LOC100506549 | -0,28 | -0,06 | -0,50 | 0.032  | 0.222  |
| A_23_P204640  | NANOG        | -0,28 | -0,05 | -0,39 | 0.018  | 0.152  |
| A_33_P3352011 |              | -0,28 | 0,09  | -0,66 | 0.028  | 0.204  |
| A_23_P326080  | DEFA4        | -0,28 | -0,26 | -0,19 | 0.008  | 0.092  |
| A_23_P385063  | DNAJB6       | -0,28 | -0,25 | -0,30 | <0.001 | <0.001 |
| A_21_P0004898 | XLOC_005347  | -0,28 | -0,18 | -0,27 | 0.044  | 0.273  |
| A_33_P3211223 |              | -0,28 | -0,16 | -0,37 | 0.028  | 0.205  |
| A_21_P0014923 | LOC100505703 | -0,28 | -0,09 | -0,43 | 0.030  | 0.215  |
| A_33_P3233843 | IL6ST        | -0,27 | -0,20 | -0,27 | <0.001 | 0.003  |
| A_24_P356601  | HEXIM1       | -0,27 | -0,26 | -0,24 | <0.001 | <0.001 |
| A_33_P3364929 |              | -0,27 | -0,26 | -0,18 | 0.005  | 0.060  |
| A_23_P70359   | AGPAT4-IT1   | -0,27 | -0,29 | -0,24 | <0.001 | <0.001 |
| A_33_P3888485 | BCO2         | -0,27 | -0,28 | -0,25 | <0.001 | <0.001 |
| A_23_P161644  | RBM14        | -0,27 | -0,30 | -0,23 | <0.001 | <0.001 |
| A_24_P218814  | RDH5         | -0,27 | -0,25 | -0,26 | <0.001 | <0.001 |
| A_21_P0013999 | LOC100653051 | -0,27 | -0,28 | -0,22 | <0.001 | <0.001 |
| A_33_P3351686 | CCDC17       | -0,27 | -0,26 | -0,26 | <0.001 | <0.001 |
| A_33_P3229239 | HIST2H2BF    | -0,27 | -0,13 | -0,39 | 0.029  | 0.211  |
| A_33_P3265249 |              | -0,27 | -0,28 | -0,20 | 0.043  | 0.271  |
| A_23_P302018  | TXK          | -0,27 | -0,21 | -0,39 | 0.007  | 0.082  |
| A_23_P50535   | DMPK         | -0,27 | -0,30 | -0,28 | <0.001 | <0.001 |

|                |                |       |       |       |        |        |
|----------------|----------------|-------|-------|-------|--------|--------|
| A_23_P158297   | BTNL3          | -0,27 | -0,41 | -0,13 | 0.011  | 0.113  |
| A_21_P0007509  | XLOC_010236    | -0,27 | -0,38 | -0,07 | 0.039  | 0.254  |
| A_24_P387875   | KCNJ10         | -0,27 | -0,20 | -0,32 | 0.022  | 0.177  |
| A_33_P3404596  |                | -0,27 | -0,19 | -0,48 | 0.043  | 0.271  |
| A_21_P0006853  | XLOC_008441    | -0,27 | -0,30 | -0,19 | 0.001  | 0.017  |
| A_23_P65262    | N4BP2L2        | -0,27 | -0,27 | -0,27 | <0.001 | <0.001 |
| A_33_P3293675  | SLC12A7        | -0,27 | -0,23 | -0,29 | 0.001  | 0.025  |
| A_21_P0003574  | XLOC_003457    | -0,27 | -0,20 | -0,32 | 0.010  | 0.105  |
| A_24_P157156   | CCDC150        | -0,27 | -0,32 | -0,27 | 0.041  | 0.260  |
| A_23_P112187   | FIBCD1         | -0,27 | -0,17 | -0,14 | 0.027  | 0.202  |
| A_33_P3397920  |                | -0,27 | -0,34 | -0,21 | 0.030  | 0.216  |
| A_21_P0012607  | XLOC_I2_010816 | -0,27 | -0,24 | -0,28 | 0.031  | 0.219  |
| A_23_P74309    | NOS1AP         | -0,27 | -0,14 | -0,31 | 0.041  | 0.259  |
| A_33_P3347511  |                | -0,27 | -0,28 | -0,27 | 0.040  | 0.256  |
| A_24_P295963   | SLC38A2        | -0,27 | -0,22 | -0,29 | <0.001 | <0.001 |
| A_33_P3337450  |                | -0,27 | -0,44 | -0,16 | 0.046  | 0.278  |
| A_24_P327815   | STIP1          | -0,27 | -0,28 | -0,29 | <0.001 | <0.001 |
| A_23_P150018   | DUSP5          | -0,27 | -0,35 | -0,25 | <0.001 | 0.001  |
| A_21_P0010685  | XLOC_I2_000010 | -0,27 | -0,26 | -0,26 | 0.025  | 0.188  |
| A_21_P0001340  | XLOC_000301    | -0,27 | -0,21 | -0,28 | <0.001 | <0.001 |
| A_23_P25674    | CKB            | -0,27 | -0,37 | -0,19 | <0.001 | 0.002  |
| A_33_P3230176  | EPT1           | -0,27 | 0,01  | -0,48 | 0.032  | 0.222  |
| A_21_P0000751  | LOC100507062   | -0,27 | -0,23 | -0,25 | <0.001 | <0.001 |
| A_24_P28295    | RABGAP1L       | -0,27 | -0,31 | -0,21 | <0.001 | <0.001 |
| A_33_P3212709  |                | -0,27 | -0,30 | -0,31 | 0.019  | 0.160  |
| A_33_P3402350  |                | -0,27 | -0,27 | -0,26 | 0.005  | 0.064  |
| A_23_P376036   | EXD1           | -0,27 | -0,19 | -0,30 | 0.034  | 0.233  |
| A_23_P112004   | LRRC6          | -0,27 | -0,25 | -0,25 | <0.001 | <0.001 |
| A_21_P0004642  | HCG27          | -0,27 | -0,25 | -0,27 | <0.001 | <0.001 |
| A_23_P143774   | MOV10L1        | -0,27 | -0,29 | -0,18 | 0.017  | 0.150  |
| A_33_P3338392  | PRDM15         | -0,27 | -0,27 | -0,26 | 0.030  | 0.217  |
| A_21_P0011832  | LOC100506328   | -0,27 | -0,23 | -0,34 | 0.017  | 0.150  |
| A_23_P51311    | LELP1          | -0,27 | -0,22 | -0,23 | 0.007  | 0.080  |
| A_21_P0011891  | XLOC_I2_007834 | -0,27 | -0,18 | -0,26 | 0.010  | 0.106  |
| A_33_P3304538  | RNF207         | -0,27 | -0,29 | -0,22 | 0.001  | 0.019  |
| A_32_P82189    | FAM161A        | -0,27 | -0,33 | -0,11 | 0.030  | 0.217  |
| A_21_P0004521  | XLOC_004478    | -0,27 | -0,19 | -0,19 | 0.013  | 0.123  |
| A_21_P0002956  | XLOC_002636    | -0,27 | -0,32 | -0,21 | 0.033  | 0.230  |
| A_33_P3849600  | HSP90AA2       | -0,27 | -0,26 | -0,27 | <0.001 | <0.001 |
| A_23_P95060    | EPHB3          | -0,27 | -0,32 | -0,21 | <0.001 | <0.001 |
| A_33_P3514859  | LOC100506342   | -0,27 | -0,22 | -0,24 | <0.001 | <0.001 |
| A_21_P0014747  | LOC100652915   | -0,27 | -0,23 | -0,30 | <0.001 | <0.001 |
| A_24_P110365   |                | -0,27 | -0,36 | -0,15 | 0.004  | 0.057  |
| A_33_P3485760  | EIF3A          | -0,27 | -0,28 | -0,25 | 0.026  | 0.193  |
| A_19_P00318213 | HCG18          | -0,27 | -0,26 | -0,27 | <0.001 | <0.001 |
| A_23_P380857   | APOL4          | -0,27 | -0,24 | -0,28 | <0.001 | 0.003  |
| A_33_P3422822  | GJC2           | -0,27 | -0,20 | -0,28 | <0.001 | <0.001 |
| A_33_P3423853  | C20orf166-AS1  | -0,27 | -0,23 | -0,27 | 0.036  | 0.244  |
| A_21_P0004871  | XLOC_005244    | -0,27 | -0,23 | -0,26 | <0.001 | <0.001 |
| A_24_P10233    | DAPK2          | -0,26 | -0,16 | -0,31 | 0.004  | 0.053  |

|               |                |       |       |       |        |        |
|---------------|----------------|-------|-------|-------|--------|--------|
| A_33_P3283213 | MGC57346       | -0,26 | -0,37 | -0,06 | 0.039  | 0.254  |
| A_23_P68234   | GPR75          | -0,26 | -0,11 | -0,13 | 0.040  | 0.257  |
| A_24_P245815  | ASPHD2         | -0,26 | -0,26 | -0,24 | <0.001 | <0.001 |
| A_23_P36203   | OR52B2         | -0,26 | -0,18 | -0,33 | 0.006  | 0.076  |
| A_33_P3480395 | FLJ30901       | -0,26 | -0,32 | -0,25 | 0.010  | 0.104  |
| A_21_P0012456 | XLOC_I2_010330 | -0,26 | -0,22 | -0,17 | 0.026  | 0.197  |

## Supplemental Table 6

The table shows the transcripts which were differentially regulated between the groups 45 minutes post-stress exposure. The criterion was a significant nominal p-value ( $\leq 0.05$ ) of the interaction term and a fold-change in gene expression from pre- to post-stress of at least 1.2 across groups. A total of 405 genes showed differential expression patterns 45 minutes post stress. Out of these, 77 transcripts were up-regulated and 69 down-regulated in the early adversity group and did not change their expression in the control group. Conversely, there were 46 up- and 68 down-regulated transcripts in the control group without significant changes in the early adversity group. Remarkably, 81 transcripts changed their expression in opposite directions: 57 transcripts showed an increase in expression in the early adversity group and decreases in the control group, whereas 24 were up-regulated in the control group and down-regulated in the early adversity group.

The table shows the differences in log<sub>2</sub> expression values (t<sub>1</sub>-t<sub>0</sub>) in the control group and the early trauma group, as well as the difference between the groups (delta log<sub>2</sub> expression values). The p-values result from the limma t-test. The p-values were multiplicity-adjusted to control the false discovery rate (FDR) by the Benjamini-Hochberg procedure.

The table is sorted in descending order of group differences. Thus, transcripts with relatively higher expression in the early trauma group can be found at the top of the table, transcripts with relatively lower expression in the early trauma group can be found at the bottom of the table.

t<sub>0</sub>: 45 minutes pre-stress exposure; t<sub>1</sub>: 45 minutes post-stress exposure.

| Agilent Probe ID | Gene Symbol  | Control Group<br>(log <sub>2</sub><br>expression<br>values t <sub>1</sub> - t <sub>0</sub> ) | Early Adversity<br>(log <sub>2</sub> expression<br>values t <sub>1</sub> - t <sub>0</sub> ) | Delta log <sub>2</sub><br>expression values<br>Early Trauma –<br>Control Group | p-value | adj. p-<br>value |
|------------------|--------------|----------------------------------------------------------------------------------------------|---------------------------------------------------------------------------------------------|--------------------------------------------------------------------------------|---------|------------------|
| A_21_P0009988    | XLOC_013596  | -0,98                                                                                        | 0,14                                                                                        | 1,12                                                                           | 0.011   | 1.000            |
| A_23_P42241      | OR5V1        | -0,36                                                                                        | 0,68                                                                                        | 1,04                                                                           | 0.015   | 1.000            |
| A_32_P32856      | PCDHGC5      | -0,40                                                                                        | 0,63                                                                                        | 1,03                                                                           | 0.004   | 1.000            |
| A_19_P00318519   | LOC100506259 | -0,41                                                                                        | 0,60                                                                                        | 1,01                                                                           | 0.002   | 1.000            |
| A_33_P3327158    | LOC100131432 | -0,48                                                                                        | 0,48                                                                                        | 0,96                                                                           | 0.020   | 1.000            |
| A_21_P0006685    | XLOC_008512  | -0,54                                                                                        | 0,40                                                                                        | 0,95                                                                           | 0.013   | 1.000            |
| A_23_P126278     | CHIT1        | -0,56                                                                                        | 0,32                                                                                        | 0,88                                                                           | 0.043   | 1.000            |
| A_24_P7600       | FBXL7        | -0,38                                                                                        | 0,45                                                                                        | 0,83                                                                           | 0.019   | 1.000            |
| A_32_P106933     | BCAR4        | -0,51                                                                                        | 0,30                                                                                        | 0,81                                                                           | 0.010   | 1.000            |
| A_21_P0009977    | XLOC_013570  | -0,37                                                                                        | 0,44                                                                                        | 0,81                                                                           | 0.007   | 1.000            |
| A_21_P0001832    | XLOC_001365  | -0,46                                                                                        | 0,35                                                                                        | 0,81                                                                           | 0.006   | 1.000            |
| A_33_P3218960    | CACNA1H      | -0,49                                                                                        | 0,31                                                                                        | 0,80                                                                           | 0.024   | 1.000            |
| A_21_P0006894    | XLOC_008558  | -0,36                                                                                        | 0,43                                                                                        | 0,79                                                                           | 0.004   | 1.000            |
| A_33_P3256282    | KRTAP10-2    | -0,31                                                                                        | 0,48                                                                                        | 0,79                                                                           | 0.021   | 1.000            |
| A_23_P51580      | HSD3B2       | -0,30                                                                                        | 0,49                                                                                        | 0,79                                                                           | 0.006   | 1.000            |
| A_33_P3422085    | SPANXN2      | -0,32                                                                                        | 0,46                                                                                        | 0,78                                                                           | <0.001  | 1.000            |
| A_21_P0002208    | XLOC_001454  | -0,28                                                                                        | 0,50                                                                                        | 0,77                                                                           | 0.009   | 1.000            |
| A_21_P0002823    | XLOC_002968  | -0,10                                                                                        | 0,67                                                                                        | 0,77                                                                           | 0.032   | 1.000            |
| A_33_P3353116    | SHBG         | -0,27                                                                                        | 0,49                                                                                        | 0,76                                                                           | 0.007   | 1.000            |
| A_21_P0014943    | LOC100653284 | -0,32                                                                                        | 0,43                                                                                        | 0,75                                                                           | 0.028   | 1.000            |



|                |                    |       |      |      |       |       |
|----------------|--------------------|-------|------|------|-------|-------|
| A_33_P3265709  | OR2Y1              | -0,28 | 0,47 | 0,75 | 0.026 | 1.000 |
| A_24_P327181   | WNK4               | -0,45 | 0,30 | 0,75 | 0.014 | 1.000 |
| A_21_P0002137  | XLOC_002473        | -0,37 | 0,38 | 0,75 | 0.008 | 1.000 |
| A_21_P0000541  | LOC100128164       | -0,59 | 0,16 | 0,74 | 0.014 | 1.000 |
| A_33_P3712008  | DKFZp547J222       | -0,34 | 0,40 | 0,74 | 0.008 | 1.000 |
| A_33_P3357421  |                    | -0,12 | 0,62 | 0,74 | 0.047 | 1.000 |
| A_21_P0008421  | XLOC_010996        | -0,47 | 0,27 | 0,74 | 0.004 | 1.000 |
| A_21_P0003283  | XLOC_003102        | -0,16 | 0,58 | 0,74 | 0.019 | 1.000 |
| A_33_P3257607  | PPP1R12B           | -0,45 | 0,28 | 0,73 | 0.021 | 1.000 |
| A_24_P32139    | HTR3E              | -0,50 | 0,23 | 0,73 | 0.002 | 1.000 |
| A_33_P3306948  | LRP6               | -0,39 | 0,34 | 0,73 | 0.004 | 1.000 |
| A_32_P82189    | FAM161A            | -0,53 | 0,19 | 0,73 | 0.004 | 1.000 |
| A_21_P0001886  | XLOC_001584        | -0,32 | 0,41 | 0,73 | 0.007 | 1.000 |
| A_21_P0014208  | MATN2              | -0,42 | 0,31 | 0,72 | 0.021 | 1.000 |
| A_33_P3221718  | LOC100129373       | -0,45 | 0,26 | 0,71 | 0.024 | 1.000 |
| A_33_P3407549  | ANKRD43            | -0,40 | 0,31 | 0,71 | 0.032 | 1.000 |
| A_24_P246107   | KRTAP13-4          | -0,41 | 0,30 | 0,71 | 0.016 | 1.000 |
| A_21_P0010022  | LOC100505683       | -0,34 | 0,37 | 0,71 | 0.049 | 1.000 |
| A_23_P165608   | SEMA4F             | -0,01 | 0,69 | 0,70 | 0.022 | 1.000 |
| A_21_P0009182  | XLOC_012323        | -0,49 | 0,21 | 0,70 | 0.013 | 1.000 |
| A_33_P3209185  |                    | -0,29 | 0,41 | 0,70 | 0.049 | 1.000 |
| A_23_P87072    | PANX3              | -0,34 | 0,36 | 0,70 | 0.004 | 1.000 |
| A_33_P3262376  | OTUD7A             | -0,39 | 0,30 | 0,70 | 0.034 | 1.000 |
| A_23_P301855   | LSAMP              | -0,15 | 0,54 | 0,69 | 0.004 | 1.000 |
| A_23_P377629   | FAM75C2            | -0,25 | 0,44 | 0,69 | 0.035 | 1.000 |
| A_19_P00802433 | XLOC_005327        | -0,24 | 0,45 | 0,69 | 0.024 | 1.000 |
| A_19_P00808794 | XLOC_I2_00822<br>1 | -0,12 | 0,58 | 0,69 | 0.011 | 1.000 |
| A_33_P3311205  | PRPF40B            | -0,41 | 0,28 | 0,69 | 0.028 | 1.000 |
| A_33_P3283824  | SLC39A8            | -0,04 | 0,64 | 0,68 | 0.028 | 1.000 |
| A_33_P3294459  | COPG2IT1           | -0,28 | 0,40 | 0,68 | 0.012 | 1.000 |
| A_23_P2271     | PTHLH              | -0,33 | 0,35 | 0,68 | 0.035 | 1.000 |
| A_23_P422933   | ARHGAP20           | -0,10 | 0,57 | 0,67 | 0.028 | 1.000 |
| A_33_P3384548  |                    | -0,15 | 0,51 | 0,67 | 0.019 | 1.000 |
| A_21_P0000051  | DISC1              | -0,51 | 0,16 | 0,67 | 0.031 | 1.000 |
| A_23_P311632   | NLRP6              | -0,37 | 0,29 | 0,66 | 0.036 | 1.000 |
| A_32_P191262   | ACR                | 0,07  | 0,73 | 0,66 | 0.001 | 1.000 |
| A_23_P51711    | CELA2B             | -0,35 | 0,31 | 0,66 | 0.004 | 1.000 |
| A_33_P3214844  | NEB                | -0,10 | 0,55 | 0,65 | 0.004 | 1.000 |
| A_23_P77980    | SLC4A1             | -0,37 | 0,29 | 0,65 | 0.047 | 1.000 |
| A_21_P0003493  | XLOC_004050        | -0,31 | 0,34 | 0,65 | 0.032 | 1.000 |
| A_21_P0014778  | LOC100507516       | -0,32 | 0,34 | 0,65 | 0.003 | 1.000 |
| A_33_P3265205  |                    | -0,16 | 0,49 | 0,65 | 0.023 | 1.000 |
| A_21_P0010373  | XLOC_014330        | -0,35 | 0,30 | 0,65 | 0.002 | 1.000 |
| A_21_P0010309  | XLOC_013923        | -0,24 | 0,41 | 0,65 | 0.034 | 1.000 |
| A_23_P376188   | BEND7              | -0,28 | 0,37 | 0,65 | 0.020 | 1.000 |
| A_33_P3239527  | LOC100128517       | -0,32 | 0,33 | 0,65 | 0.014 | 1.000 |
| A_21_P0012409  | XLOC_I2_00996<br>8 | -0,43 | 0,22 | 0,64 | 0.045 | 1.000 |
| A_33_P3419958  |                    | -0,27 | 0,37 | 0,64 | 0.023 | 1.000 |
| A_23_P20532    | CNTNAP3B           | -0,58 | 0,06 | 0,64 | 0.029 | 1.000 |

|                |                    |       |       |      |       |       |
|----------------|--------------------|-------|-------|------|-------|-------|
| A_33_P3218301  |                    | -0,34 | 0,30  | 0,64 | 0.025 | 1.000 |
| A_33_P3260862  |                    | 0,04  | 0,69  | 0,64 | 0.006 | 1.000 |
| A_21_P0006650  | XLOC_008385        | -0,31 | 0,33  | 0,64 | 0.029 | 1.000 |
| A_33_P3366241  | SCARA5             | -0,11 | 0,52  | 0,64 | 0.022 | 1.000 |
| A_21_P0001690  | XLOC_000266        | -0,30 | 0,34  | 0,63 | 0.029 | 1.000 |
| A_21_P0011259  | XLOC_I2_00431<br>7 | -0,63 | -0,01 | 0,63 | 0.048 | 1.000 |
| A_21_P0011762  | XLOC_I2_00711<br>9 | -0,23 | 0,40  | 0,63 | 0.004 | 1.000 |
| A_33_P3244834  |                    | -0,36 | 0,27  | 0,63 | 0.046 | 1.000 |
| A_33_P3218491  |                    | -0,36 | 0,26  | 0,63 | 0.006 | 1.000 |
| A_33_P3351285  |                    | -0,65 | -0,03 | 0,62 | 0.050 | 1.000 |
| A_33_P3462155  | LOC401188          | -0,30 | 0,31  | 0,62 | 0.014 | 1.000 |
| A_33_P3253574  | OR8B3              | -0,25 | 0,37  | 0,62 | 0.034 | 1.000 |
| A_21_P0010040  | XLOC_013744        | -0,25 | 0,37  | 0,62 | 0.039 | 1.000 |
| A_33_P3629151  | CDRT8              | -0,52 | 0,09  | 0,62 | 0.048 | 1.000 |
| A_24_P9833     | PRDM11             | -0,39 | 0,23  | 0,62 | 0.041 | 1.000 |
| A_21_P0005061  | XLOC_005847        | -0,36 | 0,25  | 0,61 | 0.015 | 1.000 |
| A_23_P91829    | DCBLD2             | -0,12 | 0,49  | 0,61 | 0.015 | 1.000 |
| A_32_P78101    | IGSF21             | -0,32 | 0,29  | 0,60 | 0.040 | 1.000 |
| A_21_P0003533  | XLOC_004148        | -0,15 | 0,45  | 0,60 | 0.042 | 1.000 |
| A_23_P92520    | ANP32C             | -0,28 | 0,32  | 0,60 | 0.018 | 1.000 |
| A_33_P3280916  | SNHG4              | -0,36 | 0,23  | 0,60 | 0.005 | 1.000 |
| A_33_P3417650  | KLK10              | -0,42 | 0,17  | 0,59 | 0.030 | 1.000 |
| A_24_P374564   |                    | -0,15 | 0,45  | 0,59 | 0.013 | 1.000 |
| A_21_P0012443  | XLOC_I2_01022<br>6 | -0,65 | -0,06 | 0,59 | 0.023 | 1.000 |
| A_21_P0004782  | XLOC_005857        | -0,36 | 0,23  | 0,59 | 0.026 | 1.000 |
| A_33_P3371810  |                    | -0,26 | 0,33  | 0,59 | 0.024 | 1.000 |
| A_21_P0010817  | XLOC_I2_00154<br>9 | -0,18 | 0,41  | 0,59 | 0.047 | 1.000 |
| A_23_P147918   | S100A16            | -0,36 | 0,23  | 0,59 | 0.013 | 1.000 |
| A_21_P0010683  | XLOC_I2_00000<br>6 | -0,31 | 0,28  | 0,59 | 0.026 | 1.000 |
| A_21_P0011983  | XLOC_I2_00839<br>6 | -0,16 | 0,43  | 0,59 | 0.004 | 1.000 |
| A_33_P3313532  | ANKRD20A1          | -0,55 | 0,04  | 0,58 | 0.012 | 1.000 |
| A_21_P0012537  | XLOC_I2_01014<br>9 | -0,31 | 0,27  | 0,58 | 0.031 | 1.000 |
| A_23_P85140    | TCEAL2             | -0,30 | 0,28  | 0,58 | 0.031 | 1.000 |
| A_21_P0010956  | XLOC_I2_00212<br>2 | -0,45 | 0,14  | 0,58 | 0.045 | 1.000 |
| A_33_P3352213  |                    | -0,18 | 0,40  | 0,58 | 0.005 | 1.000 |
| A_33_P3334180  | PLCH2              | -0,24 | 0,34  | 0,58 | 0.008 | 1.000 |
| A_23_P46894    | CHAT               | -0,38 | 0,19  | 0,58 | 0.047 | 1.000 |
| A_33_P3339650  | DST                | -0,31 | 0,27  | 0,58 | 0.018 | 1.000 |
| A_21_P0011218  | FLJ46358           | -0,18 | 0,40  | 0,58 | 0.036 | 1.000 |
| A_21_P0000880  | SPAG5-AS1          | -0,35 | 0,23  | 0,58 | 0.009 | 1.000 |
| A_23_P324327   | GPRC5B             | -0,25 | 0,33  | 0,58 | 0.049 | 1.000 |
| A_21_P0004085  | XLOC_004679        | -0,21 | 0,36  | 0,57 | 0.043 | 1.000 |
| A_21_P0014774  | LOC100653024       | -0,31 | 0,26  | 0,57 | 0.001 | 1.000 |
| A_24_P341344   |                    | -0,31 | 0,26  | 0,57 | 0.029 | 1.000 |
| A_19_P00318977 | LOC729178          | -0,06 | 0,50  | 0,57 | 0.008 | 1.000 |
| A_21_P0012146  | XLOC_I2_00860<br>9 | -0,19 | 0,37  | 0,56 | 0.001 | 1.000 |

|               |               |       |      |      |       |       |
|---------------|---------------|-------|------|------|-------|-------|
|               | XLOC_I2_01423 |       |      |      |       |       |
| A_21_P0013496 | 4             | -0,16 | 0,39 | 0,56 | 0.004 | 1.000 |
| A_23_P109072  | SALL4         | -0,14 | 0,42 | 0,56 | 0.036 | 1.000 |
| A_33_P3386344 | FANCA         | -0,36 | 0,20 | 0,56 | 0.029 | 1.000 |
| A_21_P0008560 | XLOC_011295   | -0,02 | 0,53 | 0,55 | 0.017 | 1.000 |
| A_24_P115990  | AMHR2         | -0,35 | 0,21 | 0,55 | 0.010 | 1.000 |
| A_21_P0001367 | XLOC_000367   | -0,04 | 0,51 | 0,55 | 0.041 | 1.000 |
|               | XLOC_I2_00154 |       |      |      |       |       |
| A_21_P0010916 | 8             | -0,43 | 0,12 | 0,55 | 0.035 | 1.000 |
| A_24_P350622  | KIR2DL4       | -0,34 | 0,21 | 0,55 | 0.020 | 1.000 |
| A_33_P3692756 | LOC723809     | -0,39 | 0,15 | 0,55 | 0.042 | 1.000 |
| A_21_P0002168 | XLOC_001342   | -0,14 | 0,41 | 0,55 | 0.006 | 1.000 |
| A_33_P3372288 | ZNF81         | -0,21 | 0,34 | 0,54 | 0.045 | 1.000 |
| A_23_P213620  | PPP2R2B       | -0,31 | 0,23 | 0,54 | 0.003 | 1.000 |
| A_23_P16189   | PRKCG         | -0,05 | 0,50 | 0,54 | 0.004 | 1.000 |
|               | XLOC_I2_01083 |       |      |      |       |       |
| A_21_P0012610 | 1             | -0,25 | 0,29 | 0,54 | 0.022 | 1.000 |
| A_33_P3411612 | TMEM221       | -0,41 | 0,13 | 0,54 | 0.037 | 1.000 |
| A_21_P0010758 | LOC388630     | -0,22 | 0,32 | 0,54 | 0.036 | 1.000 |
| A_21_P0001229 | XLOC_001225   | -0,33 | 0,21 | 0,54 | 0.012 | 1.000 |
| A_33_P3256272 | KRTAP10-5     | -0,26 | 0,28 | 0,54 | 0.045 | 1.000 |
| A_33_P3406547 |               | -0,39 | 0,15 | 0,54 | 0.004 | 1.000 |
| A_21_P0002306 | XLOC_001720   | -0,03 | 0,50 | 0,54 | 0.043 | 1.000 |
| A_23_P160886  | TAS1R1        | -0,31 | 0,22 | 0,54 | 0.023 | 1.000 |
| A_23_P135742  | C1orf170      | -0,30 | 0,23 | 0,54 | 0.017 | 1.000 |
| A_33_P3391455 | SCN5A         | -0,07 | 0,46 | 0,53 | 0.040 | 1.000 |
| A_21_P0010045 | LOC100128591  | -0,40 | 0,13 | 0,53 | 0.047 | 1.000 |
| A_33_P3381092 | OR10W1        | -0,12 | 0,41 | 0,53 | 0.025 | 1.000 |
| A_24_P135862  |               | -0,04 | 0,49 | 0,53 | 0.034 | 1.000 |
| A_33_P3357199 | SH2D6         | -0,15 | 0,38 | 0,53 | 0.022 | 1.000 |
| A_21_P0003490 | XLOC_004040   | -0,32 | 0,20 | 0,52 | 0.025 | 1.000 |
| A_33_P3235876 |               | -0,32 | 0,21 | 0,52 | 0.022 | 1.000 |
| A_23_P134627  | EMID2         | -0,23 | 0,28 | 0,52 | 0.041 | 1.000 |
| A_23_P8981    | STAR          | -0,13 | 0,39 | 0,52 | 0.016 | 1.000 |
| A_21_P0002352 | XLOC_001863   | -0,41 | 0,11 | 0,52 | 0.015 | 1.000 |
| A_21_P0009906 | XLOC_013776   | -0,25 | 0,27 | 0,52 | 0.028 | 1.000 |
| A_23_P61042   |               | -0,45 | 0,06 | 0,51 | 0.012 | 1.000 |
|               | XLOC_I2_01584 |       |      |      |       |       |
| A_21_P0013836 | 9             | -0,29 | 0,22 | 0,51 | 0.016 | 1.000 |
| A_32_P94001   | FAM92A3       | -0,26 | 0,25 | 0,51 | 0.011 | 1.000 |
| A_23_P330419  | ACPT          | -0,30 | 0,21 | 0,51 | 0.003 | 1.000 |
| A_21_P0014090 | LOC100506892  | -0,27 | 0,24 | 0,51 | 0.010 | 1.000 |
| A_21_P0000980 | XLOC_000229   | -0,36 | 0,15 | 0,51 | 0.038 | 1.000 |
|               | XLOC_I2_01314 |       |      |      |       |       |
| A_21_P0013160 | 9             | -0,33 | 0,18 | 0,51 | 0.044 | 1.000 |
| A_23_P76743   | ASPG          | -0,19 | 0,31 | 0,51 | 0.044 | 1.000 |
| A_24_P395814  | CGB           | -0,23 | 0,28 | 0,50 | 0.026 | 1.000 |
| A_21_P0008086 | XLOC_010445   | -0,29 | 0,21 | 0,50 | 0.018 | 1.000 |
| A_33_P3221916 |               | -0,43 | 0,07 | 0,50 | 0.038 | 1.000 |
| A_21_P0004355 | LOC285577     | -0,23 | 0,27 | 0,49 | 0.021 | 1.000 |
| A_23_P153183  | CNKS2         | -0,01 | 0,48 | 0,49 | 0.008 | 1.000 |
| A_21_P0009248 | XLOC_012209   | -0,32 | 0,17 | 0,49 | 0.023 | 1.000 |

|                |                    |       |       |      |       |       |
|----------------|--------------------|-------|-------|------|-------|-------|
| A_21_P0011383  | UBE2Q2P2           | -0,09 | 0,39  | 0,49 | 0.034 | 1.000 |
| A_21_P0012329  | XLOC_I2_00944<br>1 | -0,28 | 0,20  | 0,49 | 0.048 | 1.000 |
| A_23_P101905   | APC2               | -0,13 | 0,36  | 0,48 | 0.040 | 1.000 |
| A_24_P38143    | AHI1               | -0,21 | 0,28  | 0,48 | 0.025 | 1.000 |
| A_33_P3337450  |                    | -0,31 | 0,17  | 0,48 | 0.019 | 1.000 |
| A_33_P3398266  | LINC00112          | -0,39 | 0,09  | 0,48 | 0.027 | 1.000 |
| A_21_P0004396  | XLOC_004832        | -0,23 | 0,25  | 0,48 | 0.012 | 1.000 |
| A_19_P00806499 | SPG20OS            | -0,28 | 0,20  | 0,48 | 0.046 | 1.000 |
| A_33_P3360227  |                    | -0,26 | 0,21  | 0,48 | 0.033 | 1.000 |
| A_21_P0012666  | XLOC_I2_01112<br>0 | -0,04 | 0,44  | 0,47 | 0.029 | 1.000 |
| A_21_P0013206  | LOC100287294       | -0,39 | 0,08  | 0,47 | 0.033 | 1.000 |
| A_33_P3327673  | COBL               | -0,08 | 0,39  | 0,47 | 0.017 | 1.000 |
| A_21_P0001041  | XLOC_000505        | -0,20 | 0,27  | 0,47 | 0.022 | 1.000 |
| A_21_P0013180  | XLOC_I2_01330<br>0 | -0,23 | 0,23  | 0,47 | 0.007 | 1.000 |
| A_33_P3332871  |                    | -0,10 | 0,36  | 0,46 | 0.017 | 1.000 |
| A_33_P3223825  | SRRM3              | -0,03 | 0,43  | 0,46 | 0.008 | 1.000 |
| A_21_P0010866  | XLOC_I2_00192<br>9 | -0,21 | 0,25  | 0,46 | 0.011 | 1.000 |
| A_23_P127565   | LAYN               | -0,22 | 0,24  | 0,46 | 0.025 | 1.000 |
| A_24_P313180   | C14orf1            | -0,26 | 0,20  | 0,46 | 0.030 | 1.000 |
| A_24_P23921    | C17orf98           | -0,10 | 0,36  | 0,46 | 0.015 | 1.000 |
| A_19_P00318978 |                    | -0,27 | 0,18  | 0,46 | 0.023 | 1.000 |
| A_33_P3214052  | LOC729178          | -0,45 | 0,00  | 0,45 | 0.044 | 1.000 |
| A_33_P3231086  |                    | -0,07 | 0,39  | 0,45 | 0.047 | 1.000 |
| A_21_P0007087  | XLOC_008661        | -0,09 | 0,36  | 0,45 | 0.050 | 1.000 |
| A_33_P3248948  |                    | -0,47 | -0,02 | 0,45 | 0.034 | 1.000 |
| A_33_P3313075  |                    | 0,12  | 0,56  | 0,44 | 0.047 | 1.000 |
| A_23_P93105    | GABRR2             | -0,18 | 0,26  | 0,44 | 0.023 | 1.000 |
| A_33_P3336242  |                    | -0,21 | 0,22  | 0,43 | 0.044 | 1.000 |
| A_19_P00315593 | XLOC_004643        | -0,34 | 0,09  | 0,43 | 0.028 | 1.000 |
| A_23_P162861   | SERPINE3           | -0,43 | 0,00  | 0,42 | 0.035 | 1.000 |
| A_33_P3245021  |                    | -0,21 | 0,21  | 0,42 | 0.031 | 1.000 |
| A_23_P251836   | NPY5R              | -0,21 | 0,21  | 0,42 | 0.019 | 1.000 |
| A_21_P0008475  | XLOC_011102        | -0,32 | 0,10  | 0,42 | 0.033 | 1.000 |
| A_19_P00812050 | XLOC_003482        | -0,05 | 0,37  | 0,42 | 0.027 | 1.000 |
| A_21_P0007521  | XLOC_009643        | -0,32 | 0,10  | 0,42 | 0.031 | 1.000 |
| A_33_P3408949  | LOXHD1             | -0,13 | 0,29  | 0,42 | 0.030 | 1.000 |
| A_21_P0000014  | FAN1               | -0,26 | 0,16  | 0,41 | 0.022 | 1.000 |
| A_33_P3374997  | LOC144486          | -0,28 | 0,12  | 0,41 | 0.022 | 1.000 |
| A_21_P0002412  | XLOC_002013        | 0,16  | 0,56  | 0,41 | 0.045 | 1.000 |
| A_24_P150466   | SMOC1              | -0,36 | 0,04  | 0,41 | 0.045 | 1.000 |
| A_21_P0004309  | XLOC_004585        | -0,15 | 0,25  | 0,40 | 0.013 | 1.000 |
| A_23_P387537   | PRRG3              | -0,19 | 0,21  | 0,40 | 0.013 | 1.000 |
| A_21_P0010869  | XLOC_I2_00194<br>7 | -0,16 | 0,24  | 0,40 | 0.021 | 1.000 |
| A_21_P0012085  | XLOC_I2_00822<br>1 | -0,24 | 0,16  | 0,40 | 0.043 | 1.000 |
| A_24_P458479   |                    | -0,11 | 0,30  | 0,40 | 0.021 | 1.000 |
| A_21_P0006187  | LOC158435          | -0,22 | 0,18  | 0,40 | 0.012 | 1.000 |
| A_33_P3371819  | PTCD2              | -0,17 | 0,23  | 0,40 | 0.023 | 1.000 |

|                |               |       |       |       |       |       |
|----------------|---------------|-------|-------|-------|-------|-------|
|                | XLOC_I2_00929 |       |       |       |       |       |
| A_21_P0012310  | 2             | -0,26 | 0,13  | 0,40  | 0.010 | 1.000 |
| A_33_P3348001  | LOC100130458  | -0,20 | 0,19  | 0,39  | 0.013 | 1.000 |
| A_32_P214665   | PCP4L1        | 0,18  | 0,56  | 0,39  | 0.018 | 1.000 |
| A_19_P00318511 | XLOC_002504   | -0,12 | 0,26  | 0,38  | 0.042 | 1.000 |
| A_21_P0000562  | FAS-AS1       | -0,23 | 0,15  | 0,38  | 0.023 | 1.000 |
| A_23_P151598   | CPNE6         | -0,06 | 0,32  | 0,38  | 0.009 | 1.000 |
| A_32_P227605   | RGS9BP        | -0,24 | 0,13  | 0,37  | 0.012 | 1.000 |
| A_21_P0001509  | XLOC_000844   | -0,18 | 0,19  | 0,37  | 0.006 | 1.000 |
| A_21_P0003861  | LOC100506122  | -0,18 | 0,19  | 0,37  | 0.005 | 1.000 |
| A_33_P3385002  | ELK1          | -0,19 | 0,18  | 0,37  | 0.044 | 1.000 |
| A_33_P3282205  |               | 0,01  | 0,37  | 0,36  | 0.050 | 1.000 |
| A_33_P3264667  | CYP26C1       | -0,08 | 0,29  | 0,36  | 0.043 | 1.000 |
| A_33_P3379680  | OR2A5         | -0,05 | 0,30  | 0,36  | 0.017 | 1.000 |
| A_21_P0004891  | XLOC_005322   | 0,00  | 0,35  | 0,35  | 0.022 | 1.000 |
| A_23_P410110   | C10orf25      | -0,29 | 0,05  | 0,34  | 0.023 | 1.000 |
|                | XLOC_I2_01384 |       |       |       |       |       |
| A_21_P0013309  | 8             | -0,30 | 0,04  | 0,34  | 0.034 | 1.000 |
| A_33_P3424364  | CCDC152       | -0,26 | 0,08  | 0,34  | 0.010 | 1.000 |
| A_21_P0004223  | XLOC_004280   | -0,09 | 0,23  | 0,33  | 0.008 | 1.000 |
| A_23_P60742    | MYLPF         | -0,21 | 0,11  | 0,32  | 0.033 | 1.000 |
| A_19_P00322911 | TWIST2        | -0,30 | 0,01  | 0,31  | 0.020 | 1.000 |
| A_21_P0010680  | LOC100506795  | -0,13 | 0,16  | 0,29  | 0.050 | 1.000 |
|                | XLOC_I2_01213 |       |       |       |       |       |
| A_21_P0012915  | 5             | -0,33 | -0,06 | 0,27  | 0.048 | 1.000 |
| A_24_P83899    | GRM5          | -0,11 | 0,15  | 0,26  | 0.024 | 1.000 |
| A_33_P3272952  |               | -0,04 | 0,22  | 0,26  | 0.018 | 1.000 |
| A_33_P3277361  | OTX1          | 0,22  | -0,06 | -0,28 | 0.010 | 1.000 |
| A_33_P3316562  | RPS6KA5       | 0,23  | -0,05 | -0,29 | 0.007 | 1.000 |
| A_33_P3222380  | AHNAK2        | 0,18  | -0,12 | -0,30 | 0.020 | 1.000 |
| A_33_P3420635  | OR4D6         | 0,29  | -0,02 | -0,30 | 0.037 | 1.000 |
| A_33_P3363959  |               | 0,23  | -0,07 | -0,31 | 0.009 | 1.000 |
|                | XLOC_I2_01072 |       |       |       |       |       |
| A_19_P00319578 | 3             | -0,04 | -0,37 | -0,33 | 0.024 | 1.000 |
| A_21_P0002573  | XLOC_001342   | 0,21  | -0,12 | -0,33 | 0.019 | 1.000 |
|                | XLOC_I2_00742 |       |       |       |       |       |
| A_21_P0011814  | 4             | 0,23  | -0,11 | -0,34 | 0.001 | 1.000 |
| A_33_P3400309  | C6orf103      | 0,24  | -0,11 | -0,35 | 0.025 | 1.000 |
|                | XLOC_I2_01119 |       |       |       |       |       |
| A_21_P0012779  | 5             | 0,13  | -0,22 | -0,35 | 0.003 | 1.000 |
| A_21_P0010494  | XLOC_014514   | -0,01 | -0,36 | -0,35 | 0.021 | 1.000 |
| A_33_P3349693  | LCLAT1        | 0,07  | -0,28 | -0,35 | 0.018 | 1.000 |
| A_33_P3210099  | ALPK3         | 0,03  | -0,32 | -0,35 | 0.016 | 1.000 |
| A_21_P0008995  | XLOC_011826   | 0,13  | -0,22 | -0,35 | 0.047 | 1.000 |
|                | XLOC_I2_00783 |       |       |       |       |       |
| A_19_P00321356 | 4             | 0,13  | -0,23 | -0,35 | 0.033 | 1.000 |
|                | XLOC_I2_00957 |       |       |       |       |       |
| A_21_P0012302  | 8             | 0,43  | 0,08  | -0,36 | 0.023 | 1.000 |
| A_33_P3360785  | LOC100128371  | 0,01  | -0,35 | -0,36 | 0.035 | 1.000 |
| A_19_P00316014 | MIAT          | 0,42  | 0,05  | -0,37 | 0.017 | 1.000 |
| A_33_P3250669  |               | 0,16  | -0,21 | -0,37 | 0.038 | 1.000 |
| A_33_P3297285  | LOC100131667  | 0,20  | -0,17 | -0,37 | 0.023 | 1.000 |
| A_21_P0009183  | XLOC_012338   | 0,12  | -0,25 | -0,37 | 0.048 | 1.000 |
| A_24_P280762   | KHDC1         | 0,20  | -0,18 | -0,38 | 0.001 | 1.000 |

|                |                    |       |       |       |        |       |
|----------------|--------------------|-------|-------|-------|--------|-------|
| A_21_P0003915  | XLOC_004205        | 0,08  | -0,30 | -0,38 | 0.024  | 1.000 |
| A_21_P0000916  | XLOC_000360        | 0,06  | -0,32 | -0,38 | 0.008  | 1.000 |
| A_21_P0013766  | XLOC_I2_01553<br>6 | 0,18  | -0,20 | -0,39 | 0.043  | 1.000 |
| A_23_P301053   | PAIP2B             | 0,10  | -0,29 | -0,39 | 0.003  | 1.000 |
| A_32_P96134    | DPY19L1            | 0,05  | -0,35 | -0,39 | 0.032  | 1.000 |
| A_21_P0009361  | XLOC_012571        | 0,32  | -0,08 | -0,40 | 0.026  | 1.000 |
| A_33_P3560679  | LOC100287221       | 0,00  | -0,40 | -0,40 | 0.031  | 1.000 |
| A_19_P00318588 | Q4B8L8             | 0,32  | -0,08 | -0,40 | 0.016  | 1.000 |
| A_21_P0006828  | XLOC_008372        | 0,19  | -0,21 | -0,40 | 0.009  | 1.000 |
| A_21_P0014408  | LOC100506384       | 0,23  | -0,18 | -0,41 | 0.016  | 1.000 |
| A_33_P3245734  | ZNF680             | 0,12  | -0,29 | -0,41 | 0.033  | 1.000 |
| A_21_P0005462  | XLOC_006327        | 0,31  | -0,11 | -0,41 | 0.045  | 1.000 |
| A_21_P0004337  | XLOC_004637        | -0,09 | -0,50 | -0,41 | 0.035  | 1.000 |
| A_19_P00320343 | XLOC_007052        | 0,16  | -0,26 | -0,42 | 0.023  | 1.000 |
| A_24_P135193   | UEVLD              | 0,21  | -0,21 | -0,42 | 0.005  | 1.000 |
| A_33_P3696837  | MLK7-AS1           | 0,18  | -0,24 | -0,42 | 0.010  | 1.000 |
| A_33_P3293883  |                    | 0,24  | -0,17 | -0,42 | 0.023  | 1.000 |
| A_21_P0012768  | FAM86EP            | 0,24  | -0,18 | -0,42 | 0.002  | 1.000 |
| A_24_P784765   | CD59               | 0,13  | -0,29 | -0,42 | 0.045  | 1.000 |
| A_21_P0008593  | XLOC_011179        | 0,14  | -0,29 | -0,43 | <0.001 | 0.961 |
| A_33_P3389658  | PDE4D              | 0,35  | -0,08 | -0,43 | 0.015  | 1.000 |
| A_33_P3279851  | LOC100286979       | 0,03  | -0,41 | -0,44 | 0.017  | 1.000 |
| A_23_P142096   | GPR32              | 0,18  | -0,27 | -0,45 | 0.027  | 1.000 |
| A_21_P0014414  | LOC100506369       | 0,23  | -0,22 | -0,45 | 0.032  | 1.000 |
| A_33_P3316770  | SLCO1A2            | 0,23  | -0,22 | -0,45 | 0.038  | 1.000 |
| A_21_P0014726  | LOC100507563       | 0,37  | -0,08 | -0,45 | 0.031  | 1.000 |
| A_21_P0002272  | XLOC_001630        | 0,27  | -0,18 | -0,45 | 0.015  | 1.000 |
| A_21_P0003716  | XLOC_003867        | 0,35  | -0,10 | -0,45 | 0.035  | 1.000 |
| A_21_P0011964  | XLOC_I2_00825<br>9 | 0,04  | -0,41 | -0,45 | 0.016  | 1.000 |
| A_21_P0014815  | LOC646778          | 0,01  | -0,44 | -0,45 | 0.033  | 1.000 |
| A_21_P0000622  | LOC100131176       | 0,25  | -0,20 | -0,45 | 0.021  | 1.000 |
| A_21_P0003587  | XLOC_003481        | 0,18  | -0,28 | -0,46 | 0.005  | 1.000 |
| A_24_P286569   | LANCL2             | 0,27  | -0,19 | -0,46 | 0.046  | 1.000 |
| A_33_P3395502  | LOC100129884       | 0,23  | -0,23 | -0,46 | 0.009  | 1.000 |
| A_21_P0002756  | XLOC_002716        | 0,13  | -0,33 | -0,46 | 0.017  | 1.000 |
| A_21_P0002697  | LOC401109          | 0,18  | -0,27 | -0,46 | 0.012  | 1.000 |
| A_21_P0008129  | XLOC_010529        | 0,44  | -0,02 | -0,46 | 0.012  | 1.000 |
| A_33_P3780572  | LOC401164          | 0,21  | -0,25 | -0,46 | 0.043  | 1.000 |
| A_19_P00803575 | MPRIP              | 0,26  | -0,21 | -0,47 | 0.005  | 1.000 |
| A_24_P7750     |                    | 0,10  | -0,37 | -0,48 | 0.023  | 1.000 |
| A_21_P0011960  | XLOC_I2_00822<br>6 | 0,29  | -0,18 | -0,48 | 0.029  | 1.000 |
| A_21_P0006095  | XLOC_007814        | 0,34  | -0,14 | -0,48 | 0.036  | 1.000 |
| A_21_P0006652  | LOC100507163       | 0,25  | -0,23 | -0,48 | 0.030  | 1.000 |
| A_33_P3405451  | TTC28-AS1          | 0,40  | -0,08 | -0,48 | 0.015  | 1.000 |
| A_33_P3345031  |                    | 0,22  | -0,27 | -0,49 | 0.033  | 1.000 |
| A_33_P3411907  | FGF5               | 0,43  | -0,05 | -0,49 | 0.040  | 1.000 |
| A_23_P130158   | WNT3               | 0,07  | -0,42 | -0,49 | 0.009  | 1.000 |
| A_33_P3228718  | CLEC19A            | 0,00  | -0,49 | -0,49 | 0.043  | 1.000 |

|                |                    |       |       |       |        |       |
|----------------|--------------------|-------|-------|-------|--------|-------|
| A_21_P0005062  | XLOC_005854        | 0,25  | -0,25 | -0,49 | 0.002  | 1.000 |
| A_33_P3299122  | HNF1A              | 0,31  | -0,18 | -0,49 | 0.017  | 1.000 |
| A_21_P0007705  | XLOC_010064        | 0,25  | -0,25 | -0,49 | 0.038  | 1.000 |
| A_23_P4808     | PTGER1             | 0,22  | -0,28 | -0,49 | 0.020  | 1.000 |
| A_24_P89835    | MAPK15             | 0,25  | -0,25 | -0,50 | 0.032  | 1.000 |
| A_21_P0000710  | HMGA1P7            | 0,27  | -0,22 | -0,50 | 0.010  | 1.000 |
| A_24_P66312    | KRTAP12-1          | 0,36  | -0,14 | -0,50 | 0.040  | 1.000 |
| A_23_P89302    | CACNG1             | 0,28  | -0,22 | -0,50 | 0.046  | 1.000 |
| A_33_P3375513  |                    | 0,24  | -0,26 | -0,50 | 0.021  | 1.000 |
| A_23_P83634    | ALOX12B            | 0,39  | -0,11 | -0,50 | 0.040  | 1.000 |
| A_33_P3279362  | GRIK1-AS1          | 0,05  | -0,45 | -0,50 | 0.039  | 1.000 |
| A_24_P106502   | PRICKLE4           | 0,10  | -0,40 | -0,51 | 0.034  | 1.000 |
| A_33_P3246715  | LOC441495          | 0,15  | -0,35 | -0,51 | 0.001  | 1.000 |
| A_33_P3285271  | FMO6P              | 0,09  | -0,42 | -0,51 | 0.036  | 1.000 |
| A_24_P69053    | ODZ3               | 0,30  | -0,21 | -0,51 | 0.021  | 1.000 |
| A_33_P3370109  | IMPA1              | 0,15  | -0,36 | -0,51 | 0.004  | 1.000 |
| A_33_P3348328  |                    | 0,27  | -0,24 | -0,51 | 0.009  | 1.000 |
| A_32_P135243   | MTHFD1L            | -0,08 | -0,59 | -0,52 | 0.009  | 1.000 |
| A_21_P0010033  | XLOC_013720        | 0,17  | -0,34 | -0,52 | 0.014  | 1.000 |
| A_33_P3851023  | NRXN3              | 0,34  | -0,18 | -0,52 | 0.037  | 1.000 |
| A_21_P0004809  | XLOC_005938        | 0,14  | -0,38 | -0,52 | 0.041  | 1.000 |
| A_33_P3571824  | NCR1               | 0,37  | -0,15 | -0,53 | 0.027  | 1.000 |
| A_21_P0002012  | XLOC_001975        | 0,48  | -0,05 | -0,53 | 0.025  | 1.000 |
| A_19_P00322673 | XLOC_I2_01331<br>4 | 0,26  | -0,27 | -0,53 | 0.021  | 1.000 |
| A_21_P0005897  | XLOC_007197        | 0,41  | -0,12 | -0,53 | 0.046  | 1.000 |
| A_21_P0013942  | LOC100130830       | 0,33  | -0,20 | -0,53 | 0.013  | 1.000 |
| A_33_P3351259  | LOC100130560       | 0,08  | -0,45 | -0,53 | 0.017  | 1.000 |
| A_21_P0004459  | XLOC_005052        | 0,36  | -0,16 | -0,53 | 0.032  | 1.000 |
| A_19_P00315826 | XLOC_001148        | 0,50  | -0,03 | -0,53 | 0.035  | 1.000 |
| A_21_P0014420  | LOC100506503       | 0,33  | -0,20 | -0,54 | 0.026  | 1.000 |
| A_23_P256470   | NPY                | 0,16  | -0,37 | -0,54 | 0.023  | 1.000 |
| A_23_P71379    | PSCA               | 0,28  | -0,26 | -0,54 | 0.001  | 1.000 |
| A_33_P3543013  | OR5AK4P            | 0,15  | -0,39 | -0,54 | 0.014  | 1.000 |
| A_33_P3346338  | WDR67              | 0,28  | -0,27 | -0,54 | <0.001 | 1.000 |
| A_21_P0003545  | XLOC_004187        | 0,14  | -0,41 | -0,55 | 0.033  | 1.000 |
| A_24_P132624   | NIPSNAP3B          | 0,41  | -0,14 | -0,55 | 0.030  | 1.000 |
| A_33_P3322730  |                    | 0,13  | -0,42 | -0,55 | 0.031  | 1.000 |
| A_21_P0014400  | LOC100128997       | 0,11  | -0,44 | -0,55 | 0.032  | 1.000 |
| A_33_P3282213  |                    | -0,09 | -0,65 | -0,56 | 0.023  | 1.000 |
| A_21_P0012344  | XLOC_I2_00946<br>9 | 0,37  | -0,19 | -0,56 | 0.030  | 1.000 |
| A_33_P3416142  | LOC100131234       | 0,60  | 0,04  | -0,56 | <0.001 | 1.000 |
| A_21_P0000815  | LOC100506122       | 0,25  | -0,31 | -0,56 | 0.038  | 1.000 |
| A_21_P0010558  | PDE4DIP            | 0,35  | -0,21 | -0,56 | 0.025  | 1.000 |
| A_33_P3384229  |                    | 0,29  | -0,28 | -0,57 | 0.042  | 1.000 |
| A_21_P0003709  | XLOC_003852        | 0,39  | -0,18 | -0,57 | 0.004  | 1.000 |
| A_33_P3296769  |                    | 0,14  | -0,43 | -0,57 | 0.014  | 1.000 |
| A_21_P0001280  | XLOC_000129        | 0,35  | -0,22 | -0,57 | 0.006  | 1.000 |
| A_33_P3773195  | LOC285762          | 0,31  | -0,27 | -0,58 | 0.040  | 1.000 |
| A_24_P362595   | PAX3               | 0,32  | -0,26 | -0,58 | 0.023  | 1.000 |

|                |                    |       |       |       |        |       |
|----------------|--------------------|-------|-------|-------|--------|-------|
| A_21_P0000628  | LGALS8-AS1         | 0,17  | -0,41 | -0,58 | 0.038  | 1.000 |
| A_33_P3412349  | ZNF268             | 0,23  | -0,36 | -0,59 | 0.007  | 1.000 |
| A_21_P0009738  | XLOC_013218        | 0,09  | -0,50 | -0,59 | 0.033  | 1.000 |
| A_23_P72697    | GPIHBP1            | 0,23  | -0,36 | -0,59 | 0.015  | 1.000 |
| A_33_P3275674  |                    | 0,15  | -0,44 | -0,59 | 0.013  | 1.000 |
| A_23_P311144   | CCDC138            | 0,17  | -0,43 | -0,60 | 0.008  | 1.000 |
| A_21_P0009047  | XLOC_011978        | 0,28  | -0,32 | -0,60 | 0.045  | 1.000 |
| A_33_P3526458  | LOC338579          | -0,14 | -0,74 | -0,60 | 0.027  | 1.000 |
| A_23_P319557   |                    | 0,29  | -0,31 | -0,60 | 0.048  | 1.000 |
| A_21_P0003249  | XLOC_002803        | 0,51  | -0,09 | -0,61 | 0.025  | 1.000 |
| A_21_P0004862  | XLOC_005214        | 0,17  | -0,44 | -0,61 | 0.010  | 1.000 |
| A_23_P81131    | CORIN              | 0,13  | -0,48 | -0,61 | 0.018  | 1.000 |
| A_21_P0002632  | XLOC_001910        | 0,12  | -0,50 | -0,62 | 0.034  | 1.000 |
| A_21_P0002722  | XLOC_002565        | 0,18  | -0,43 | -0,62 | 0.025  | 1.000 |
| A_21_P0012303  | psiTPTE22          | 0,39  | -0,23 | -0,63 | 0.037  | 1.000 |
| A_21_P0008975  | XLOC_011797        | 0,23  | -0,40 | -0,63 | 0.012  | 1.000 |
| A_24_P93736    | FLJ40292           | 0,25  | -0,38 | -0,63 | 0.002  | 1.000 |
| A_23_P15692    | GPR172B            | 0,30  | -0,33 | -0,63 | 0.023  | 1.000 |
| A_21_P0002347  | XLOC_001855        | 0,46  | -0,19 | -0,65 | 0.005  | 1.000 |
| A_33_P3237879  |                    | 0,43  | -0,22 | -0,65 | 0.009  | 1.000 |
| A_33_P3300332  | LOC644093          | 0,19  | -0,46 | -0,65 | 0.021  | 1.000 |
| A_33_P3357283  |                    | 0,47  | -0,19 | -0,66 | 0.045  | 1.000 |
| A_33_P3213311  |                    | 0,10  | -0,56 | -0,66 | 0.025  | 1.000 |
| A_19_P00802607 | XLOC_001537        | 0,30  | -0,36 | -0,66 | 0.032  | 1.000 |
| A_23_P326157   | GAL3ST2            | 0,23  | -0,44 | -0,67 | 0.007  | 1.000 |
| A_33_P3394965  |                    | 0,56  | -0,11 | -0,67 | 0.011  | 1.000 |
| A_19_P00320675 | LOC653712          | 0,30  | -0,38 | -0,68 | 0.030  | 1.000 |
| A_33_P3256778  | CNTF               | 0,19  | -0,50 | -0,68 | <0.001 | 1.000 |
| A_21_P0007210  | XLOC_009126        | 0,23  | -0,46 | -0,69 | 0.003  | 1.000 |
| A_33_P3251940  | LOC100131608       | 0,27  | -0,43 | -0,70 | 0.001  | 1.000 |
| A_21_P0005971  | XLOC_007161        | 0,34  | -0,35 | -0,70 | 0.001  | 1.000 |
| A_21_P0012735  | XLOC_I2_01077<br>2 | 0,25  | -0,46 | -0,71 | 0.009  | 1.000 |
| A_21_P0006782  | XLOC_008907        | 0,35  | -0,37 | -0,71 | 0.005  | 1.000 |
| A_32_P163247   | CD8A               | 0,36  | -0,35 | -0,71 | 0.020  | 1.000 |
| A_21_P0005325  | XLOC_006567        | 0,51  | -0,22 | -0,73 | 0.015  | 1.000 |
| A_33_P3405966  | ST3GAL3            | 0,24  | -0,49 | -0,73 | 0.013  | 1.000 |
| A_21_P0013779  | XLOC_I2_01557<br>8 | 0,27  | -0,46 | -0,73 | 0.006  | 1.000 |
| A_33_P3281171  | LOC100130987       | 0,45  | -0,28 | -0,73 | 0.020  | 1.000 |
| A_21_P0011779  | LOC100506930       | 0,44  | -0,29 | -0,74 | 0.007  | 1.000 |
| A_33_P3379701  | TRIM36             | 0,15  | -0,58 | -0,74 | 0.012  | 1.000 |
| A_23_P371215   | ICOS               | 0,13  | -0,61 | -0,75 | 0.012  | 1.000 |
| A_32_P99100    | PTPRK              | 0,27  | -0,48 | -0,75 | 0.017  | 1.000 |
| A_21_P0007622  | XLOC_009872        | 0,30  | -0,45 | -0,76 | 0.009  | 1.000 |
| A_21_P0010801  | XLOC_I2_00142<br>1 | 0,33  | -0,45 | -0,78 | 0.013  | 1.000 |
| A_21_P0014510  | LOC645321          | 0,14  | -0,67 | -0,81 | 0.014  | 1.000 |
| A_21_P0012656  | XLOC_I2_01104<br>3 | 0,58  | -0,24 | -0,81 | <0.001 | 1.000 |
| A_33_P3411279  | CYP21A2            | -0,02 | -0,85 | -0,83 | 0.032  | 1.000 |
| A_33_P3356492  |                    | 0,39  | -0,48 | -0,87 | 0.002  | 1.000 |



|               |              |      |       |       |       |       |
|---------------|--------------|------|-------|-------|-------|-------|
| A_23_P22352   | FRMD4A       | 0,47 | -0,40 | -0,88 | 0.004 | 1.000 |
| A_33_P3261953 |              | 0,36 | -0,55 | -0,91 | 0.030 | 1.000 |
| A_33_P3355926 | LOC100130894 | 0,39 | -0,58 | -0,96 | 0.003 | 1.000 |
| A_33_P3260667 | OR2T34       | 0,52 | -0,56 | -1,08 | 0.016 | 1.000 |

## Supplemental Table 7

The table shows the 608 transcripts which were differentially regulated between the groups 180 minutes post-stress exposure. Out of these, 141 transcripts were up-regulated and 86 down-regulated in the early adversity group and did not change their expression in the control group. Conversely, 86 up- and 82 down-regulated transcripts in the control group were without significant changes in the early adversity group. A total of 129 transcripts were counter-regulated between the groups: 81 were up-regulated in the early trauma group and down-regulated in the control group, whereas 48 showed an increase in expression in the control group and decreases in the early trauma group.

The table shows the differences in log<sub>2</sub> expression values (t<sub>2</sub>-t<sub>0</sub>) in the control group and the early trauma group, as well as the difference between the groups (delta log<sub>2</sub> expression values).

The table is sorted in descending order of group differences. Thus, transcripts with relatively higher expression in the early trauma group can be found at the top of the table, transcripts with relatively lower expression in the early trauma group can be found at the bottom of the table. The *p*-values result from the limma *t*-test. The *p*-values were multiplicity-adjusted to control the false discovery rate (FDR) by the Benjamini–Hochberg procedure.

t<sub>0</sub>: 45 minutes pre-stress exposure; t<sub>2</sub>: 180 minutes post-stress exposure.

| Agilent Probe ID | Gene Symbol    | Control Group<br>(log <sub>2</sub> expression<br>values t <sub>2</sub> - t <sub>0</sub> ) | Early Adversity<br>(log <sub>2</sub> expression<br>values t <sub>2</sub> - t <sub>0</sub> ) | Delta log <sub>2</sub><br>expression<br>values<br>Early Trauma –<br>Control Group | p-value | adj. p-<br>value |
|------------------|----------------|-------------------------------------------------------------------------------------------|---------------------------------------------------------------------------------------------|-----------------------------------------------------------------------------------|---------|------------------|
| A_21_P0005109    | XLOC_005180    | -0,31                                                                                     | 0,78                                                                                        | 1,09                                                                              | 0.003   | 0.500            |
| A_24_P7600       | FBXL7          | -0,32                                                                                     | 0,75                                                                                        | 1,08                                                                              | 0.001   | 0.422            |
| A_23_P42241      | OR5V1          | -0,24                                                                                     | 0,83                                                                                        | 1,07                                                                              | 0.001   | 0.458            |
| A_21_P0009215    | XLOC_012095    | -0,28                                                                                     | 0,78                                                                                        | 1,06                                                                              | 0.035   | 0.738            |
| A_21_P0003476    | XLOC_003976    | -0,19                                                                                     | 0,86                                                                                        | 1,05                                                                              | 0.002   | 0.474            |
| A_21_P0009578    | XLOC_012880    | -0,45                                                                                     | 0,60                                                                                        | 1,05                                                                              | 0.001   | 0.458            |
| A_21_P0006253    | XLOC_007645    | -0,48                                                                                     | 0,55                                                                                        | 1,03                                                                              | 0.002   | 0.474            |
| A_19_P00322498   | Q7VPR2         | -0,47                                                                                     | 0,56                                                                                        | 1,03                                                                              | <0.001  | 0.269            |
| A_23_P86411      | MYO3A          | -0,44                                                                                     | 0,58                                                                                        | 1,01                                                                              | 0.001   | 0.458            |
| A_23_P303101     | PCDHGC4        | -0,38                                                                                     | 0,63                                                                                        | 1,00                                                                              | <0.001  | 0.370            |
| A_33_P3417650    | KLK10          | -0,24                                                                                     | 0,75                                                                                        | 0,99                                                                              | 0.003   | 0.492            |
| A_33_P3382111    |                | -0,56                                                                                     | 0,43                                                                                        | 0,99                                                                              | 0.002   | 0.473            |
| A_23_P126278     | CHIT1          | -0,64                                                                                     | 0,34                                                                                        | 0,99                                                                              | 0.011   | 0.635            |
| A_21_P0007422    | XLOC_009606    | -0,27                                                                                     | 0,71                                                                                        | 0,98                                                                              | 0.004   | 0.523            |
| A_33_P3367681    |                | -0,42                                                                                     | 0,54                                                                                        | 0,96                                                                              | 0.007   | 0.583            |
| A_21_P0001856    | XLOC_001452    | -0,34                                                                                     | 0,62                                                                                        | 0,96                                                                              | 0.002   | 0.474            |
| A_19_P00319064   | XLOC_I2_007967 | -0,44                                                                                     | 0,51                                                                                        | 0,95                                                                              | 0.001   | 0.422            |
| A_33_P3375170    | LOC100131242   | -0,53                                                                                     | 0,41                                                                                        | 0,94                                                                              | 0.003   | 0.492            |
| A_21_P0010983    | XLOC_I2_002355 | -0,31                                                                                     | 0,63                                                                                        | 0,93                                                                              | 0.003   | 0.498            |
| A_33_P3806676    |                | -0,49                                                                                     | 0,44                                                                                        | 0,93                                                                              | 0.008   | 0.583            |
| A_21_P0013504    | XLOC_I2_014388 | -0,35                                                                                     | 0,56                                                                                        | 0,91                                                                              | 0.006   | 0.564            |
| A_21_P0006148    | XLOC_007368    | -0,24                                                                                     | 0,65                                                                                        | 0,89                                                                              | 0.003   | 0.500            |

|                |                |       |      |      |        |       |
|----------------|----------------|-------|------|------|--------|-------|
| A_23_P391857   | ESRRB          | -0,49 | 0,40 | 0,89 | 0,011  | 0,635 |
| A_33_P3244553  |                | -0,43 | 0,46 | 0,89 | 0,001  | 0,449 |
| A_19_P00318519 | LOC100506259   | -0,20 | 0,69 | 0,89 | 0,003  | 0,498 |
| A_33_P3260862  |                | -0,23 | 0,65 | 0,89 | 0,011  | 0,635 |
| A_21_P0009271  | XLOC_012304    | -0,30 | 0,57 | 0,87 | 0,007  | 0,583 |
| A_23_P159721   | GPR50          | -0,50 | 0,37 | 0,87 | <0.001 | 0,422 |
| A_23_P377629   | FAM75C2        | -0,40 | 0,46 | 0,86 | 0,031  | 0,727 |
| A_32_P32856    | PCDHGC5        | -0,34 | 0,52 | 0,86 | 0,027  | 0,719 |
| A_33_P3299110  | ARHGAP42       | -0,36 | 0,50 | 0,86 | 0,004  | 0,523 |
| A_23_P116523   |                | -0,18 | 0,68 | 0,86 | 0,001  | 0,458 |
| A_19_P00806499 | SPG20OS        | -0,37 | 0,48 | 0,85 | 0,001  | 0,449 |
| A_21_P0010713  | XLOC_I2_000353 | -0,20 | 0,65 | 0,84 | 0,003  | 0,507 |
| A_23_P330419   | ACPT           | -0,41 | 0,42 | 0,84 | 0,001  | 0,456 |
| A_21_P0001154  | XLOC_000920    | -0,39 | 0,45 | 0,83 | 0,023  | 0,695 |
| A_21_P0011532  | XLOC_I2_005714 | -0,70 | 0,13 | 0,83 | 0,042  | 0,761 |
| A_21_P0004156  | XLOC_004928    | -0,18 | 0,64 | 0,82 | 0,002  | 0,474 |
| A_33_P3295091  | C1orf140       | -0,17 | 0,64 | 0,81 | 0,019  | 0,668 |
| A_21_P0005227  | XLOC_006059    | -0,51 | 0,30 | 0,81 | 0,011  | 0,635 |
| A_21_P0014079  | C1orf61        | -0,31 | 0,49 | 0,81 | 0,001  | 0,458 |
| A_23_P45011    | PPP1R14C       | -0,15 | 0,65 | 0,80 | 0,006  | 0,568 |
| A_21_P0011494  | XLOC_I2_005606 | -0,04 | 0,75 | 0,79 | 0,014  | 0,647 |
| A_21_P0014778  | LOC100507516   | -0,32 | 0,47 | 0,79 | 0,007  | 0,583 |
| A_21_P0004747  | XLOC_005713    | -0,25 | 0,53 | 0,78 | 0,007  | 0,583 |
| A_33_P3407549  | ANKRD43        | -0,28 | 0,50 | 0,78 | 0,033  | 0,733 |
| A_21_P0012314  | XLOC_I2_009302 | -0,30 | 0,48 | 0,78 | 0,001  | 0,445 |
| A_33_P3311205  | PRPF40B        | -0,41 | 0,37 | 0,78 | 0,035  | 0,738 |
| A_33_P3294314  |                | -0,41 | 0,36 | 0,77 | 0,004  | 0,523 |
| A_21_P0003757  | XLOC_004049    | -0,08 | 0,70 | 0,77 | 0,034  | 0,733 |
| A_21_P0013465  | XLOC_I2_014086 | -0,17 | 0,60 | 0,77 | 0,011  | 0,635 |
| A_33_P3334180  | PLCH2          | -0,20 | 0,57 | 0,77 | 0,001  | 0,458 |
| A_21_P0010732  | XLOC_I2_000465 | -0,25 | 0,52 | 0,77 | 0,011  | 0,635 |
| A_23_P102462   | FBLN7          | -0,22 | 0,54 | 0,77 | 0,002  | 0,474 |
| A_21_P0007649  | XLOC_009927    | -0,31 | 0,46 | 0,77 | 0,037  | 0,742 |
| A_23_P79769    | BIRC7          | -0,31 | 0,44 | 0,76 | 0,001  | 0,445 |
| A_21_P0010112  | XLOC_013683    | -0,47 | 0,28 | 0,75 | 0,046  | 0,764 |
| A_21_P0011428  | SLC9B1         | 0,06  | 0,80 | 0,75 | 0,012  | 0,636 |
| A_33_P3315698  | ABHD12B        | -0,34 | 0,41 | 0,75 | 0,004  | 0,523 |
| A_24_P227211   | KLC2           | -0,24 | 0,51 | 0,74 | 0,006  | 0,564 |
| A_33_P3210228  | ZCCHC6         | -0,45 | 0,30 | 0,74 | 0,004  | 0,523 |
| A_33_P3265709  | OR2Y1          | -0,48 | 0,26 | 0,74 | 0,050  | 0,782 |
| A_23_P46894    | CHAT           | -0,38 | 0,36 | 0,74 | 0,008  | 0,609 |
| A_24_P132813   | OPALIN         | -0,32 | 0,41 | 0,74 | 0,002  | 0,461 |
| A_33_P3334155  | LOC100652791   | -0,34 | 0,40 | 0,73 | 0,002  | 0,474 |
| A_23_P414281   | C16orf71       | -0,27 | 0,46 | 0,73 | 0,021  | 0,683 |
| A_33_P3394405  | LOC727721      | -0,67 | 0,06 | 0,73 | 0,028  | 0,723 |
| A_21_P0004448  | XLOC_005024    | -0,44 | 0,29 | 0,73 | 0,006  | 0,564 |
| A_21_P0009544  | XLOC_012812    | -0,30 | 0,41 | 0,71 | 0,004  | 0,523 |
| A_21_P0014780  | LOC100652747   | -0,40 | 0,31 | 0,71 | 0,019  | 0,668 |
| A_21_P0003793  | XLOC_004153    | -0,35 | 0,36 | 0,71 | 0,003  | 0,507 |
| A_24_P126892   |                | -0,60 | 0,11 | 0,71 | 0,025  | 0,699 |

|                |                |       |      |      |        |       |
|----------------|----------------|-------|------|------|--------|-------|
| A_23_P24311    | ALDH3B2        | -0,22 | 0,48 | 0,70 | 0,042  | 0,761 |
| A_21_P0009450  | XLOC_012621    | -0,29 | 0,41 | 0,70 | 0,002  | 0,474 |
| A_23_P117363   | SERPINA6       | -0,30 | 0,40 | 0,70 | 0,010  | 0,632 |
| A_19_P00811430 | XLOC_011183    | -0,32 | 0,37 | 0,69 | 0,022  | 0,687 |
| A_23_P78762    | HSD17B14       | -0,13 | 0,56 | 0,69 | 0,019  | 0,669 |
| A_33_P3318343  | CTAG2          | -0,34 | 0,35 | 0,69 | 0,004  | 0,523 |
| A_23_P35055    | NPHS2          | -0,23 | 0,46 | 0,69 | 0,024  | 0,699 |
| A_21_P0012146  | XLOC_I2_008609 | -0,24 | 0,45 | 0,69 | 0,001  | 0,422 |
| A_21_P0014745  | LOC100652924   | -0,21 | 0,47 | 0,68 | 0,026  | 0,707 |
| A_21_P0003286  | XLOC_003149    | -0,40 | 0,28 | 0,68 | <0.001 | 0,269 |
| A_33_P3241591  | LOC100131864   | -0,35 | 0,33 | 0,68 | 0,030  | 0,727 |
| A_23_P385105   | PLCD4          | -0,37 | 0,31 | 0,68 | 0,028  | 0,725 |
| A_21_P0012537  | XLOC_I2_010149 | -0,40 | 0,28 | 0,68 | 0,004  | 0,523 |
| A_19_P00321348 | XLOC_005921    | -0,11 | 0,56 | 0,68 | 0,011  | 0,635 |
| A_23_P160167   | TSPAN1         | -0,28 | 0,39 | 0,67 | 0,011  | 0,635 |
| A_33_P3262069  | OR2AG2         | -0,25 | 0,42 | 0,67 | 0,014  | 0,647 |
| A_33_P3519424  | LOC386597      | -0,33 | 0,34 | 0,67 | 0,040  | 0,761 |
| A_23_P51580    | HSD3B2         | -0,35 | 0,32 | 0,67 | 0,018  | 0,661 |
| A_23_P135132   | FRMD3          | -0,33 | 0,34 | 0,67 | 0,007  | 0,583 |
| A_21_P0008387  | XLOC_010931    | -0,54 | 0,12 | 0,67 | 0,006  | 0,560 |
| A_21_P0008523  | XLOC_010915    | -0,32 | 0,34 | 0,66 | 0,003  | 0,498 |
| A_21_P0001337  | XLOC_000291    | -0,22 | 0,44 | 0,66 | 0,029  | 0,727 |
| A_33_P3339731  | LOC100131170   | -0,44 | 0,21 | 0,66 | 0,036  | 0,738 |
| A_23_P127565   | LAYN           | -0,29 | 0,36 | 0,66 | 0,014  | 0,647 |
| A_33_P3358457  | GLI2           | -0,33 | 0,32 | 0,65 | 0,002  | 0,482 |
| A_24_P32139    | HTR3E          | -0,30 | 0,35 | 0,65 | 0,002  | 0,474 |
| A_33_P3775281  | LOC644050      | -0,18 | 0,47 | 0,65 | 0,002  | 0,474 |
| A_21_P0005222  | XLOC_006044    | -0,34 | 0,31 | 0,65 | 0,031  | 0,727 |
| A_21_P0005977  | XLOC_007235    | -0,26 | 0,38 | 0,65 | 0,004  | 0,523 |
| A_23_P258164   | CORT           | -0,19 | 0,45 | 0,64 | 0,003  | 0,507 |
| A_33_P3256282  | KRTAP10-2      | -0,28 | 0,36 | 0,64 | 0,030  | 0,727 |
| A_21_P0000512  | SNAR-I         | -0,14 | 0,50 | 0,64 | 0,045  | 0,761 |
| A_33_P3372288  | ZNF81          | -0,07 | 0,56 | 0,64 | 0,010  | 0,625 |
| A_33_P3400643  | LOC643529      | -0,07 | 0,57 | 0,64 | 0,037  | 0,742 |
| A_33_P3751230  | LOC284628      | -0,27 | 0,37 | 0,64 | 0,007  | 0,583 |
| A_23_P429998   | FOSB           | 0,12  | 0,76 | 0,64 | 0,031  | 0,727 |
| A_23_P397468   | OR10J1         | -0,34 | 0,30 | 0,64 | 0,005  | 0,529 |
| A_21_P0002397  | XLOC_001971    | -0,36 | 0,27 | 0,64 | 0,011  | 0,635 |
| A_24_P150466   | SMOC1          | -0,11 | 0,53 | 0,63 | 0,045  | 0,764 |
| A_32_P148275   | SPIC           | -0,23 | 0,40 | 0,63 | 0,044  | 0,761 |
| A_33_P3321293  | IQGAP3         | 0,12  | 0,75 | 0,63 | 0,007  | 0,583 |
| A_23_P6066     | CPXM1          | -0,31 | 0,32 | 0,63 | <0.001 | 0,370 |
| A_33_P3279610  | COX6A2         | -0,24 | 0,39 | 0,63 | 0,032  | 0,729 |
| A_21_P0009242  | XLOC_012184    | -0,34 | 0,29 | 0,63 | 0,023  | 0,695 |
| A_21_P0003216  | XLOC_002573    | -0,19 | 0,44 | 0,63 | 0,042  | 0,761 |
| A_19_P00802433 | XLOC_005327    | -0,23 | 0,40 | 0,63 | 0,027  | 0,719 |
| A_23_P45976    | RAP1GAP        | -0,28 | 0,35 | 0,63 | 0,017  | 0,661 |
| A_23_P44363    | CASKIN2        | -0,58 | 0,04 | 0,62 | 0,018  | 0,661 |
| A_33_P3391225  |                | -0,57 | 0,05 | 0,62 | 0,009  | 0,624 |
| A_21_P0005208  | XLOC_005979    | -0,27 | 0,35 | 0,62 | 0,003  | 0,492 |

|                |                |       |      |      |        |       |
|----------------|----------------|-------|------|------|--------|-------|
| A_21_P0005141  | XLOC_005514    | -0,40 | 0,22 | 0,62 | 0,002  | 0,461 |
| A_23_P207336   | PPY            | -0,22 | 0,40 | 0,62 | 0,032  | 0,729 |
| A_21_P0001643  | XLOC_001263    | -0,31 | 0,31 | 0,62 | 0,004  | 0,523 |
| A_33_P3363100  |                | -0,21 | 0,40 | 0,61 | 0,025  | 0,701 |
| A_23_P347029   | TAS2R50        | -0,34 | 0,27 | 0,61 | 0,013  | 0,647 |
| A_24_P368735   | ARL10          | -0,18 | 0,44 | 0,61 | 0,013  | 0,647 |
| A_33_P3354723  | DEDD           | -0,19 | 0,42 | 0,61 | 0,007  | 0,583 |
| A_21_P0012789  | XLOC_I2_011227 | 0,08  | 0,69 | 0,61 | 0,029  | 0,727 |
| A_21_P0001690  | XLOC_000266    | -0,15 | 0,46 | 0,61 | 0,003  | 0,507 |
| A_23_P55917    | SYT3           | -0,09 | 0,52 | 0,61 | 0,018  | 0,661 |
| A_33_P3317168  | EPS8L3         | -0,23 | 0,37 | 0,61 | <0.001 | 0,278 |
| A_21_P0009973  | XLOC_013562    | -0,23 | 0,37 | 0,61 | 0,030  | 0,727 |
| A_21_P0002797  | XLOC_002909    | -0,41 | 0,20 | 0,60 | 0,003  | 0,507 |
| A_24_P128727   |                | -0,05 | 0,55 | 0,60 | 0,042  | 0,761 |
| A_21_P0009172  | XLOC_012240    | -0,33 | 0,27 | 0,60 | 0,026  | 0,707 |
| A_19_P00807614 | XLOC_012683    | -0,21 | 0,39 | 0,60 | 0,017  | 0,661 |
| A_33_P3282683  | LOC100130027   | -0,34 | 0,25 | 0,59 | 0,039  | 0,758 |
| A_33_P3404889  | LPHN2          | -0,19 | 0,41 | 0,59 | 0,002  | 0,486 |
| A_24_P49896    | GDPD4          | -0,35 | 0,24 | 0,59 | 0,006  | 0,568 |
| A_33_P3324409  |                | -0,48 | 0,11 | 0,59 | 0,028  | 0,721 |
| A_33_P3245674  | ZNF329         | -0,26 | 0,33 | 0,59 | 0,039  | 0,758 |
| A_21_P0010734  | XLOC_I2_000522 | -0,23 | 0,36 | 0,59 | 0,008  | 0,583 |
| A_33_P3289391  |                | -0,31 | 0,28 | 0,59 | 0,017  | 0,661 |
| A_21_P0003493  | XLOC_004050    | -0,22 | 0,36 | 0,59 | 0,008  | 0,583 |
| A_21_P0008705  | XLOC_011397    | -0,03 | 0,56 | 0,59 | 0,018  | 0,661 |
| A_21_P0003176  | XLOC_003250    | -0,16 | 0,42 | 0,59 | 0,006  | 0,564 |
| A_33_P3329769  | BEND6          | -0,41 | 0,17 | 0,59 | 0,018  | 0,661 |
| A_21_P0013197  | XLOC_I2_013383 | -0,36 | 0,22 | 0,58 | 0,009  | 0,619 |
| A_21_P0010622  | XLOC_I2_000941 | -0,03 | 0,55 | 0,58 | 0,037  | 0,743 |
| A_23_P165608   | SEMA4F         | -0,24 | 0,34 | 0,58 | 0,023  | 0,695 |
| A_33_P3353948  |                | -0,11 | 0,47 | 0,58 | <0.001 | 0,370 |
| A_24_P373768   | GIPR           | -0,20 | 0,38 | 0,58 | 0,003  | 0,492 |
| A_21_P0011762  | XLOC_I2_007119 | -0,24 | 0,34 | 0,58 | 0,003  | 0,492 |
| A_33_P3232478  | CACNA2D1       | -0,30 | 0,28 | 0,58 | 0,013  | 0,647 |
| A_33_P3241250  | LOC401357      | -0,22 | 0,36 | 0,58 | 0,002  | 0,474 |
| A_21_P0004782  | XLOC_005857    | -0,39 | 0,19 | 0,58 | 0,048  | 0,776 |
| A_33_P3232937  | LOC100289178   | -0,28 | 0,30 | 0,58 | 0,050  | 0,781 |
| A_21_P0008581  | XLOC_011157    | -0,33 | 0,25 | 0,58 | 0,014  | 0,647 |
| A_21_P0011921  | XLOC_I2_008040 | -0,21 | 0,37 | 0,57 | 0,002  | 0,478 |
| A_21_P0001568  | LOC440600      | -0,53 | 0,04 | 0,57 | 0,018  | 0,661 |
| A_24_P383478   | ESR1           | -0,21 | 0,37 | 0,57 | 0,015  | 0,647 |
| A_24_P366787   | FLJ42875       | -0,29 | 0,28 | 0,57 | 0,016  | 0,655 |
| A_33_P3282291  | FLJ40039       | -0,21 | 0,36 | 0,57 | <0.001 | 0,237 |
| A_33_P3824237  | LOC439990      | -0,24 | 0,33 | 0,57 | 0,011  | 0,635 |
| A_21_P0013037  | LOC154092      | -0,38 | 0,19 | 0,57 | 0,009  | 0,614 |
| A_23_P44867    | AMBN           | -0,31 | 0,25 | 0,56 | 0,001  | 0,458 |
| A_23_P254507   | HOPX           | -0,22 | 0,34 | 0,56 | 0,017  | 0,661 |
| A_33_P3385002  | ELK1           | -0,31 | 0,25 | 0,56 | 0,031  | 0,727 |
| A_21_P0000862  | LOC100132987   | -0,27 | 0,29 | 0,56 | 0,024  | 0,699 |
| A_33_P3350547  | SCN5A          | -0,24 | 0,32 | 0,56 | 0,025  | 0,699 |

|                |                |       |      |      |        |       |
|----------------|----------------|-------|------|------|--------|-------|
| A_24_P380349   | HTR1E          | -0,22 | 0,34 | 0,56 | 0,003  | 0,492 |
| A_33_P3273819  |                | -0,45 | 0,11 | 0,56 | 0,003  | 0,523 |
| A_21_P0004812  | XLOC_005119    | -0,13 | 0,43 | 0,55 | 0,034  | 0,734 |
| A_19_P00318978 |                | -0,20 | 0,35 | 0,55 | 0,004  | 0,523 |
| A_33_P3323019  |                | -0,18 | 0,37 | 0,55 | 0,001  | 0,458 |
| A_24_P32574    | KNDC1          | -0,52 | 0,03 | 0,55 | 0,014  | 0,647 |
| A_21_P0001852  | XLOC_001428    | -0,02 | 0,53 | 0,55 | 0,020  | 0,669 |
| A_24_P212234   | SLC6A18        | -0,14 | 0,41 | 0,55 | 0,043  | 0,761 |
| A_23_P119936   | REG3A          | -0,31 | 0,24 | 0,55 | 0,005  | 0,552 |
| A_33_P3298750  |                | -0,29 | 0,26 | 0,55 | 0,006  | 0,572 |
| A_23_P167841   | KCNQ5          | -0,41 | 0,14 | 0,55 | 0,023  | 0,695 |
| A_21_P0014748  | LOC100653178   | -0,39 | 0,16 | 0,55 | 0,004  | 0,523 |
| A_21_P0001041  | XLOC_000505    | -0,13 | 0,41 | 0,54 | 0,001  | 0,458 |
| A_21_P0003960  | XLOC_004274    | -0,35 | 0,20 | 0,54 | 0,005  | 0,529 |
| A_21_P0005456  | XLOC_006321    | -0,14 | 0,40 | 0,54 | 0,021  | 0,683 |
| A_33_P3330074  |                | -0,20 | 0,34 | 0,54 | 0,001  | 0,422 |
| A_32_P152437   | AKAP12         | -0,15 | 0,39 | 0,54 | 0,032  | 0,731 |
| A_21_P0009248  | XLOC_012209    | -0,33 | 0,21 | 0,53 | 0,004  | 0,523 |
| A_33_P3390226  |                | -0,33 | 0,20 | 0,53 | 0,033  | 0,733 |
| A_19_P00316479 | LOC553137      | -0,05 | 0,48 | 0,53 | 0,005  | 0,544 |
| A_21_P0008725  | XLOC_011433    | -0,23 | 0,31 | 0,53 | 0,008  | 0,607 |
| A_33_P3260974  |                | -0,21 | 0,32 | 0,53 | 0,006  | 0,560 |
| A_33_P3376365  | HES2           | -0,28 | 0,25 | 0,53 | 0,030  | 0,727 |
| A_33_P3245021  |                | -0,32 | 0,21 | 0,53 | 0,015  | 0,647 |
| A_23_P153797   | NCAN           | -0,22 | 0,31 | 0,53 | 0,022  | 0,695 |
| A_21_P0004355  | LOC285577      | -0,31 | 0,22 | 0,53 | 0,049  | 0,776 |
| A_19_P00315593 | XLOC_004643    | -0,44 | 0,09 | 0,53 | 0,001  | 0,422 |
| A_33_P3374035  | PDXK           | -0,49 | 0,03 | 0,53 | 0,042  | 0,761 |
| A_33_P3398998  | C2orf50        | -0,27 | 0,25 | 0,52 | <0.001 | 0,387 |
| A_21_P0008421  | XLOC_010996    | -0,41 | 0,11 | 0,52 | 0,005  | 0,529 |
| A_21_P0005446  | XLOC_006298    | -0,19 | 0,33 | 0,52 | 0,010  | 0,632 |
| A_21_P0003868  | XLOC_003807    | -0,01 | 0,52 | 0,52 | 0,037  | 0,741 |
| A_33_P3313625  |                | -0,34 | 0,18 | 0,52 | 0,014  | 0,647 |
| A_33_P3258546  | PCDHA5         | -0,16 | 0,36 | 0,52 | 0,007  | 0,583 |
| A_33_P3393010  | PKDCC          | -0,52 | 0,00 | 0,52 | 0,030  | 0,727 |
| A_24_P419039   | PCDH19         | -0,14 | 0,38 | 0,52 | 0,034  | 0,733 |
| A_33_P3366241  | SCARA5         | -0,06 | 0,46 | 0,52 | 0,012  | 0,635 |
| A_19_P00317974 | XLOC_005342    | -0,37 | 0,15 | 0,52 | 0,018  | 0,661 |
| A_19_P00321697 | LINC00313      | -0,18 | 0,34 | 0,52 | 0,011  | 0,635 |
| A_19_P00320162 | LOC100132240   | -0,32 | 0,19 | 0,52 | 0,024  | 0,699 |
| A_23_P43350    | MLANA          | -0,28 | 0,24 | 0,52 | 0,011  | 0,635 |
| A_21_P0012310  | XLOC_I2_009292 | -0,29 | 0,22 | 0,52 | 0,037  | 0,743 |
| A_21_P0010251  | XLOC_013950    | -0,28 | 0,23 | 0,52 | 0,014  | 0,647 |
| A_21_P0001694  | XLOC_000303    | -0,40 | 0,12 | 0,51 | 0,031  | 0,727 |
| A_21_P0007408  | XLOC_009576    | -0,36 | 0,15 | 0,51 | 0,003  | 0,500 |
| A_21_P0001197  | XLOC_001098    | -0,32 | 0,20 | 0,51 | 0,011  | 0,635 |
| A_21_P0013160  | XLOC_I2_013149 | -0,34 | 0,17 | 0,51 | 0,017  | 0,656 |
| A_23_P150979   | MUCL1          | -0,33 | 0,18 | 0,51 | 0,024  | 0,699 |
| A_19_P00315492 | Q73P46         | -0,35 | 0,16 | 0,51 | 0,030  | 0,727 |
| A_33_P3288246  | MCC            | -0,48 | 0,03 | 0,51 | 0,013  | 0,647 |

|                |                |       |      |      |        |       |
|----------------|----------------|-------|------|------|--------|-------|
| A_24_P115990   | AMHR2          | -0,24 | 0,27 | 0,51 | 0,017  | 0,656 |
| A_33_P3381092  | OR10W1         | -0,26 | 0,25 | 0,51 | 0,018  | 0,661 |
| A_19_P00321577 | XLOC_010390    | -0,15 | 0,36 | 0,51 | 0,001  | 0,458 |
| A_23_P501547   | ADCY6          | -0,45 | 0,05 | 0,51 | 0,045  | 0,761 |
| A_33_P3280916  | SNHG4          | -0,09 | 0,42 | 0,51 | 0,005  | 0,544 |
| A_23_P377882   | KCNH2          | -0,23 | 0,28 | 0,50 | 0,035  | 0,738 |
| A_23_P374844   | GAL            | -0,16 | 0,34 | 0,50 | 0,021  | 0,680 |
| A_21_P0013089  | XLOC_I2_013056 | -0,33 | 0,17 | 0,50 | 0,003  | 0,500 |
| A_21_P0006894  | XLOC_008558    | -0,34 | 0,16 | 0,50 | 0,011  | 0,635 |
| A_33_P3343473  | ATRNL1         | -0,13 | 0,37 | 0,50 | 0,023  | 0,696 |
| A_24_P203418   |                | -0,14 | 0,36 | 0,50 | 0,028  | 0,721 |
| A_32_P3534     | PGPEP1L        | -0,19 | 0,31 | 0,49 | 0,029  | 0,727 |
| A_21_P0011881  | XLOC_I2_007802 | -0,19 | 0,31 | 0,49 | <0.001 | 0,387 |
| A_21_P0006415  | XLOC_007942    | -0,23 | 0,27 | 0,49 | 0,007  | 0,583 |
| A_21_P0013689  | XLOC_I2_014694 | -0,05 | 0,44 | 0,49 | 0,015  | 0,647 |
| A_21_P0006277  | XLOC_007735    | -0,17 | 0,33 | 0,49 | 0,010  | 0,634 |
| A_33_P3401701  | EDNRA          | -0,40 | 0,09 | 0,49 | 0,007  | 0,581 |
| A_21_P0012328  | LOC100507474   | -0,35 | 0,14 | 0,49 | 0,018  | 0,661 |
| A_21_P0002142  | XLOC_002517    | -0,15 | 0,35 | 0,49 | 0,046  | 0,764 |
| A_33_P3288491  | KLHL38         | -0,26 | 0,23 | 0,49 | 0,015  | 0,647 |
| A_33_P3394465  | PROP1          | -0,27 | 0,22 | 0,49 | 0,011  | 0,635 |
| A_21_P0004223  | XLOC_004280    | -0,09 | 0,40 | 0,49 | 0,001  | 0,458 |
| A_33_P3274562  | SLC19A3        | -0,37 | 0,12 | 0,49 | 0,022  | 0,695 |
| A_33_P3298173  | DEFA7P         | -0,03 | 0,45 | 0,49 | 0,041  | 0,761 |
| A_33_P3314073  |                | -0,26 | 0,23 | 0,49 | 0,012  | 0,636 |
| A_23_P23996    | MAT1A          | -0,25 | 0,23 | 0,49 | 0,007  | 0,583 |
| A_32_P48466    | LCA5L          | -0,34 | 0,15 | 0,49 | 0,021  | 0,683 |
| A_32_P327679   | DKFZP434K028   | -0,27 | 0,21 | 0,48 | 0,014  | 0,647 |
| A_24_P941167   | APOL6          | -0,26 | 0,23 | 0,48 | 0,025  | 0,699 |
| A_21_P0011498  | XLOC_I2_005295 | 0,03  | 0,51 | 0,48 | 0,031  | 0,727 |
| A_21_P0005007  | XLOC_005629    | -0,06 | 0,42 | 0,48 | 0,023  | 0,695 |
| A_21_P0006697  | XLOC_008560    | -0,19 | 0,30 | 0,48 | 0,040  | 0,761 |
| A_33_P3375541  | CD3D           | -0,20 | 0,27 | 0,48 | 0,011  | 0,635 |
| A_23_P108082   | CREB3L3        | -0,44 | 0,03 | 0,48 | 0,010  | 0,632 |
| A_33_P3338423  | SPRY4          | -0,29 | 0,19 | 0,48 | 0,033  | 0,733 |
| A_23_P213620   | PPP2R2B        | -0,20 | 0,27 | 0,48 | 0,012  | 0,636 |
| A_24_P119131   | TMEM120B       | -0,31 | 0,16 | 0,48 | 0,014  | 0,647 |
| A_23_P70733    | TAAR2          | -0,14 | 0,33 | 0,47 | 0,044  | 0,761 |
| A_21_P0002948  | XLOC_002618    | -0,01 | 0,46 | 0,47 | 0,027  | 0,719 |
| A_33_P3218491  |                | -0,30 | 0,17 | 0,47 | 0,006  | 0,564 |
| A_21_P0000353  | SCARNA23       | 0,14  | 0,61 | 0,47 | 0,018  | 0,661 |
| A_33_P3210119  | HLA-L          | -0,08 | 0,39 | 0,47 | 0,003  | 0,507 |
| A_19_P00321789 | XLOC_005464    | -0,11 | 0,35 | 0,46 | <0.001 | 0,401 |
| A_32_P92789    | LOC728012      | -0,28 | 0,18 | 0,46 | 0,013  | 0,647 |
| A_23_P322395   | ZSCAN1         | -0,15 | 0,31 | 0,46 | 0,005  | 0,544 |
| A_33_P3876192  | IGLV1-44       | -0,36 | 0,10 | 0,46 | 0,039  | 0,759 |
| A_23_P62752    | NPPB           | -0,16 | 0,31 | 0,46 | 0,040  | 0,761 |
| A_33_P3243138  | SELV           | -0,14 | 0,32 | 0,46 | 0,033  | 0,733 |
| A_23_P44964    | FAM171A1       | -0,01 | 0,45 | 0,46 | 0,013  | 0,647 |
| A_23_P211345   | TBX1           | -0,05 | 0,41 | 0,46 | 0,032  | 0,729 |

|                |                |       |       |      |        |       |
|----------------|----------------|-------|-------|------|--------|-------|
| A_33_P3294459  | COPG2IT1       | -0,24 | 0,22  | 0,46 | 0.013  | 0.647 |
| A_33_P3390918  | FSD2           | 0,01  | 0,46  | 0,45 | 0.044  | 0.761 |
| A_21_P0009182  | XLOC_012323    | -0,15 | 0,30  | 0,45 | 0.039  | 0.759 |
| A_33_P3330428  |                | -0,17 | 0,28  | 0,45 | 0.030  | 0.727 |
| A_21_P0004547  | XLOC_004673    | -0,27 | 0,19  | 0,45 | 0.016  | 0.654 |
| A_21_P0000268  | SNORA69        | -0,36 | 0,09  | 0,45 | 0.043  | 0.761 |
| A_21_P0005213  | XLOC_005988    | -0,23 | 0,23  | 0,45 | 0.023  | 0.696 |
| A_21_P0013875  | XLOC_I2_015878 | 0,01  | 0,46  | 0,45 | 0.043  | 0.761 |
| A_21_P0011758  | XLOC_I2_007097 | -0,15 | 0,30  | 0,45 | 0.045  | 0.761 |
| A_24_P852756   | HLA-DQA2       | -0,12 | 0,33  | 0,45 | 0.026  | 0.711 |
| A_33_P3326643  | OTOG           | -0,27 | 0,18  | 0,45 | 0.009  | 0.614 |
| A_24_P51683    | CDK5R2         | -0,18 | 0,26  | 0,45 | 0.031  | 0.727 |
| A_33_P3303729  |                | -0,08 | 0,36  | 0,44 | 0.018  | 0.661 |
| A_33_P3538104  | LOC283854      | -0,13 | 0,32  | 0,44 | 0.034  | 0.734 |
| A_21_P0000616  | LOC728377      | -0,31 | 0,13  | 0,44 | 0.020  | 0.673 |
| A_33_P3362952  | LRRC37BP1      | -0,26 | 0,18  | 0,44 | <0.001 | 0.387 |
| A_21_P0009702  | XLOC_013028    | -0,10 | 0,34  | 0,44 | 0.006  | 0.568 |
| A_21_P0009346  | XLOC_012551    | -0,30 | 0,14  | 0,44 | 0.030  | 0.727 |
| A_21_P0002208  | XLOC_001454    | -0,31 | 0,12  | 0,43 | 0.031  | 0.727 |
| A_24_P580248   |                | -0,25 | 0,18  | 0,43 | 0.038  | 0.756 |
| A_23_P3312     | ISLR           | -0,30 | 0,14  | 0,43 | 0.003  | 0.498 |
| A_19_P00322242 | GALNT9         | -0,18 | 0,25  | 0,43 | 0.027  | 0.711 |
| A_23_P381351   | CSH1           | -0,27 | 0,16  | 0,43 | 0.033  | 0.733 |
| A_24_P151121   | A1BG           | -0,25 | 0,17  | 0,43 | 0.046  | 0.764 |
| A_33_P3415124  | DNAH10OS       | -0,23 | 0,20  | 0,43 | 0.037  | 0.742 |
| A_23_P147918   | S100A16        | -0,05 | 0,37  | 0,43 | 0.050  | 0.781 |
| A_21_P0007555  | XLOC_009740    | -0,24 | 0,19  | 0,43 | 0.015  | 0.647 |
| A_23_P162861   | SERPINE3       | -0,46 | -0,04 | 0,42 | 0.034  | 0.734 |
| A_24_P341344   |                | -0,23 | 0,18  | 0,42 | 0.016  | 0.652 |
| A_21_P0012547  | XLOC_I2_010319 | -0,16 | 0,25  | 0,42 | 0.026  | 0.706 |
| A_21_P0000935  | XLOC_001149    | -0,26 | 0,14  | 0,41 | 0.011  | 0.635 |
| A_19_P00319337 | C6orf208       | -0,02 | 0,39  | 0,41 | 0.045  | 0.761 |
| A_21_P0012285  | XLOC_I2_009468 | -0,22 | 0,19  | 0,40 | 0.003  | 0.507 |
| A_33_P3317979  | MYO5B          | -0,20 | 0,21  | 0,40 | 0.033  | 0.733 |
| A_21_P0014041  | IPO13          | -0,16 | 0,24  | 0,40 | 0.033  | 0.733 |
| A_33_P3337134  | ABLIM2         | 0,07  | 0,47  | 0,40 | 0.030  | 0.727 |
| A_21_P0002107  | XLOC_002339    | -0,22 | 0,18  | 0,40 | 0.045  | 0.761 |
| A_33_P3373991  |                | -0,21 | 0,19  | 0,40 | 0.018  | 0.661 |
| A_33_P3339361  | ARHGAP11A      | 0,10  | 0,50  | 0,40 | 0.033  | 0.733 |
| A_21_P0004537  | XLOC_004635    | -0,37 | 0,03  | 0,40 | 0.009  | 0.614 |
| A_23_P115467   | S100A5         | -0,17 | 0,22  | 0,39 | <0.001 | 0.422 |
| A_33_P3271196  | AMOTL1         | -0,05 | 0,34  | 0,39 | 0.002  | 0.482 |
| A_21_P0013836  | XLOC_I2_015849 | -0,08 | 0,31  | 0,39 | 0.005  | 0.529 |
| A_23_P28834    | PHACTR3        | -0,33 | 0,06  | 0,39 | 0.007  | 0.583 |
| A_23_P9340     | BARHL1         | -0,21 | 0,17  | 0,39 | 0.026  | 0.705 |
| A_33_P3311730  |                | -0,14 | 0,25  | 0,39 | 0.025  | 0.699 |
| A_23_P81926    | PSORS1C2       | -0,20 | 0,19  | 0,38 | 0.026  | 0.707 |
| A_33_P3257050  |                | -0,26 | 0,12  | 0,38 | 0.033  | 0.733 |
| A_21_P0012834  | THBS4          | -0,15 | 0,23  | 0,38 | 0.006  | 0.564 |
| A_24_P321525   | RERG           | -0,35 | 0,03  | 0,38 | 0.043  | 0.761 |



|                |                |       |       |       |       |       |
|----------------|----------------|-------|-------|-------|-------|-------|
| A_19_P00318977 | LOC729178      | -0,11 | 0,27  | 0,37  | 0,044 | 0,761 |
| A_23_P89601    | KRT32          | -0,19 | 0,18  | 0,37  | 0,048 | 0,776 |
| A_21_P0003490  | XLOC_004040    | -0,27 | 0,10  | 0,37  | 0,008 | 0,598 |
| A_33_P3382489  |                | -0,17 | 0,20  | 0,37  | 0,030 | 0,727 |
| A_33_P3321993  |                | -0,10 | 0,26  | 0,36  | 0,030 | 0,727 |
| A_33_P3390217  | TTLL9          | -0,19 | 0,17  | 0,36  | 0,029 | 0,727 |
| A_33_P3378545  |                | -0,14 | 0,22  | 0,36  | 0,042 | 0,761 |
| A_23_P209360   | KLHL29         | -0,02 | 0,34  | 0,36  | 0,039 | 0,759 |
| A_21_P0011732  | XLOC_I2_006983 | -0,10 | 0,26  | 0,36  | 0,037 | 0,743 |
| A_24_P221414   | DYNC111        | -0,17 | 0,19  | 0,36  | 0,011 | 0,635 |
| A_21_P0006946  | XLOC_008688    | -0,20 | 0,15  | 0,34  | 0,027 | 0,711 |
| A_23_P212508   | TF             | -0,26 | 0,09  | 0,34  | 0,006 | 0,560 |
| A_33_P3325643  | LINC00487      | 0,10  | 0,44  | 0,34  | 0,044 | 0,761 |
| A_21_P0011129  | TPTE2P6        | -0,31 | 0,03  | 0,33  | 0,047 | 0,768 |
| A_21_P0011703  | XLOC_I2_006789 | -0,18 | 0,15  | 0,32  | 0,019 | 0,668 |
| A_21_P0000944  | XLOC_000035    | -0,12 | 0,20  | 0,32  | 0,046 | 0,764 |
| A_33_P3343577  |                | -0,30 | 0,02  | 0,32  | 0,050 | 0,782 |
| A_21_P0003556  | XLOC_003411    | -0,15 | 0,16  | 0,31  | 0,046 | 0,764 |
| A_21_P0010955  | GUCY2GP        | 0,00  | 0,31  | 0,31  | 0,033 | 0,733 |
| A_33_P3326942  |                | -0,24 | 0,07  | 0,31  | 0,006 | 0,564 |
| A_23_P370574   | KIR3DL3        | -0,25 | 0,04  | 0,29  | 0,029 | 0,727 |
| A_24_P23921    | C17orf98       | -0,02 | 0,25  | 0,27  | 0,040 | 0,761 |
| A_19_P00811264 | XLOC_012720    | -0,08 | 0,19  | 0,26  | 0,007 | 0,583 |
| A_33_P3387320  | RPL31          | 0,10  | 0,33  | 0,23  | 0,031 | 0,727 |
| A_21_P0010313  | XLOC_013949    | -0,12 | 0,07  | 0,19  | 0,021 | 0,686 |
| A_21_P0000662  | LOC100131320   | -0,06 | 0,12  | 0,18  | 0,043 | 0,761 |
| A_23_P144827   | FBXL7          | 0,20  | -0,03 | -0,22 | 0,038 | 0,750 |
| A_33_P3294911  | C12orf66       | 0,14  | -0,11 | -0,25 | 0,036 | 0,738 |
| A_21_P0002238  | XLOC_001516    | 0,06  | -0,20 | -0,26 | 0,022 | 0,695 |
| A_21_P0005442  | XLOC_006291    | 0,19  | -0,07 | -0,26 | 0,044 | 0,761 |
| A_33_P3404116  |                | 0,08  | -0,18 | -0,26 | 0,013 | 0,647 |
| A_21_P0001991  | XLOC_001945    | 0,09  | -0,18 | -0,28 | 0,041 | 0,761 |
| A_33_P3213408  | OR10AD1        | 0,34  | 0,07  | -0,28 | 0,048 | 0,770 |
| A_33_P3212954  | SPANXN4        | 0,27  | -0,02 | -0,29 | 0,012 | 0,645 |
| A_21_P0006041  | XLOC_007519    | 0,00  | -0,30 | -0,30 | 0,015 | 0,647 |
| A_21_P0009055  | XLOC_012003    | 0,18  | -0,12 | -0,30 | 0,004 | 0,523 |
| A_33_P3402010  | C14orf56       | -0,01 | -0,32 | -0,31 | 0,021 | 0,683 |
| A_23_P204801   | SLC41A2        | 0,13  | -0,19 | -0,32 | 0,047 | 0,764 |
| A_21_P0005101  | XLOC_005126    | 0,27  | -0,06 | -0,33 | 0,027 | 0,715 |
| A_21_P0003674  | XLOC_003772    | 0,18  | -0,15 | -0,33 | 0,031 | 0,727 |
| A_24_P357169   | EPPK1          | 0,07  | -0,27 | -0,34 | 0,002 | 0,478 |
| A_33_P3312661  |                | 0,25  | -0,09 | -0,34 | 0,035 | 0,738 |
| A_33_P3333089  | LOC729444      | 0,18  | -0,17 | -0,35 | 0,024 | 0,696 |
| A_21_P0013510  | XLOC_I2_014459 | 0,38  | 0,03  | -0,36 | 0,043 | 0,761 |
| A_21_P0014368  | LOC100505754   | 0,18  | -0,18 | -0,36 | 0,005 | 0,529 |
| A_33_P3365368  | PTH1R          | 0,07  | -0,29 | -0,36 | 0,008 | 0,598 |
| A_33_P3239989  |                | 0,24  | -0,12 | -0,36 | 0,017 | 0,656 |
| A_33_P3349501  |                | 0,12  | -0,24 | -0,36 | 0,021 | 0,684 |
| A_33_P3333787  |                | 0,08  | -0,28 | -0,37 | 0,009 | 0,625 |
| A_21_P0001088  | XLOC_000677    | 0,25  | -0,12 | -0,37 | 0,036 | 0,738 |

|                |                |      |       |       |       |       |
|----------------|----------------|------|-------|-------|-------|-------|
| A_33_P3411260  | LOC100288884   | 0,05 | -0,32 | -0,37 | 0,044 | 0,761 |
| A_21_P0001016  | XLOC_000391    | 0,21 | -0,16 | -0,37 | 0,009 | 0,625 |
| A_33_P3273068  | ALX4           | 0,40 | 0,03  | -0,37 | 0,039 | 0,760 |
| A_33_P3394075  | RIT1           | 0,15 | -0,23 | -0,38 | 0,047 | 0,768 |
| A_24_P150931   | NXPB3          | 0,14 | -0,23 | -0,38 | 0,041 | 0,761 |
| A_24_P358591   | C2orf70        | 0,11 | -0,27 | -0,38 | 0,026 | 0,707 |
| A_33_P3373446  | LOC100507505   | 0,12 | -0,26 | -0,38 | 0,031 | 0,727 |
| A_19_P00810085 |                | 0,29 | -0,09 | -0,38 | 0,014 | 0,647 |
| A_33_P3303557  |                | 0,30 | -0,08 | -0,39 | 0,026 | 0,707 |
| A_33_P3389649  | PDE4D          | 0,22 | -0,17 | -0,39 | 0,038 | 0,750 |
| A_33_P3220976  | EFHB           | 0,36 | -0,03 | -0,39 | 0,034 | 0,733 |
| A_33_P3252146  | HMX3           | 0,20 | -0,19 | -0,39 | 0,014 | 0,647 |
| A_21_P0004998  | XLOC_005595    | 0,22 | -0,17 | -0,39 | 0,034 | 0,734 |
| A_23_P59976    | GML            | 0,35 | -0,05 | -0,39 | 0,047 | 0,770 |
| A_33_P3362008  | NPPB           | 0,26 | -0,14 | -0,39 | 0,041 | 0,761 |
| A_21_P0005451  | XLOC_006308    | 0,16 | -0,23 | -0,40 | 0,030 | 0,727 |
| A_19_P00319147 | IPW            | 0,08 | -0,32 | -0,40 | 0,002 | 0,474 |
| A_21_P0012945  | XLOC_I2_011627 | 0,20 | -0,19 | -0,40 | 0,032 | 0,729 |
| A_21_P0000460  | SNORD121A      | 0,23 | -0,17 | -0,40 | 0,016 | 0,652 |
| A_33_P3607600  | SNORA80        | 0,30 | -0,11 | -0,40 | 0,031 | 0,727 |
| A_21_P0010995  | XLOC_I2_002441 | 0,45 | 0,04  | -0,41 | 0,019 | 0,668 |
| A_33_P3413404  | PARVB          | 0,21 | -0,20 | -0,41 | 0,030 | 0,727 |
| A_23_P163481   | BUB1B          | 0,32 | -0,09 | -0,41 | 0,030 | 0,727 |
| A_21_P0009332  | XLOC_012515    | 0,28 | -0,13 | -0,41 | 0,025 | 0,699 |
| A_23_P67785    | SPAG16         | 0,26 | -0,16 | -0,42 | 0,029 | 0,727 |
| A_33_P3226420  | RSAD2          | 0,66 | 0,24  | -0,42 | 0,029 | 0,727 |
| A_23_P385861   | CDCA2          | 0,25 | -0,17 | -0,42 | 0,025 | 0,699 |
| A_21_P0009640  | XLOC_012899    | 0,37 | -0,06 | -0,42 | 0,035 | 0,738 |
| A_21_P0007210  | XLOC_009126    | 0,35 | -0,07 | -0,43 | 0,005 | 0,544 |
| A_33_P3424826  |                | 0,27 | -0,16 | -0,43 | 0,033 | 0,733 |
| A_32_P213330   | RGNEF          | 0,08 | -0,35 | -0,43 | 0,008 | 0,611 |
| A_33_P3222380  | AHNAK2         | 0,15 | -0,28 | -0,43 | 0,001 | 0,445 |
| A_23_P125204   | OR10G8         | 0,26 | -0,17 | -0,43 | 0,023 | 0,695 |
| A_33_P3222962  | RIBC1          | 0,20 | -0,23 | -0,43 | 0,031 | 0,727 |
| A_21_P0003916  | XLOC_004206    | 0,15 | -0,28 | -0,43 | 0,022 | 0,689 |
| A_33_P3245734  | ZNF680         | 0,31 | -0,12 | -0,44 | 0,038 | 0,748 |
| A_21_P0006869  | XLOC_008477    | 0,41 | -0,02 | -0,44 | 0,029 | 0,727 |
| A_21_P0012772  | XLOC_I2_011095 | 0,02 | -0,42 | -0,44 | 0,036 | 0,738 |
| A_24_P143843   |                | 0,24 | -0,20 | -0,44 | 0,019 | 0,668 |
| A_33_P3235410  | PTPLA          | 0,25 | -0,19 | -0,44 | 0,016 | 0,656 |
| A_33_P3264735  | LOC100128869   | 0,23 | -0,22 | -0,44 | 0,044 | 0,761 |
| A_21_P0005971  | XLOC_007161    | 0,14 | -0,30 | -0,44 | 0,018 | 0,661 |
| A_21_P0007127  | XLOC_009192    | 0,29 | -0,16 | -0,45 | 0,011 | 0,635 |
| A_33_P3242793  | C1orf81        | 0,15 | -0,29 | -0,45 | 0,023 | 0,695 |
| A_21_P0007015  | XLOC_008935    | 0,30 | -0,14 | -0,45 | 0,018 | 0,661 |
| A_24_P324368   | DNAJC14        | 0,20 | -0,25 | -0,45 | 0,019 | 0,661 |
| A_23_P170959   | LMLN           | 0,39 | -0,06 | -0,45 | 0,029 | 0,727 |
| A_33_P3219711  | SUMF1          | 0,16 | -0,29 | -0,45 | 0,032 | 0,733 |
| A_23_P81131    | CORIN          | 0,02 | -0,43 | -0,45 | 0,036 | 0,738 |
| A_23_P306223   | ARX            | 0,23 | -0,22 | -0,45 | 0,042 | 0,761 |

|                |                |       |       |       |       |       |
|----------------|----------------|-------|-------|-------|-------|-------|
| A_21_P0010058  | XLOC_013793    | 0,05  | -0,40 | -0,45 | 0,006 | 0,568 |
| A_23_P72697    | GPIHBP1        | 0,20  | -0,25 | -0,45 | 0,011 | 0,635 |
| A_33_P3281224  |                | 0,08  | -0,37 | -0,45 | 0,023 | 0,696 |
| A_33_P3310929  | ADAM12         | 0,26  | -0,19 | -0,45 | 0,029 | 0,727 |
| A_19_P00316194 | MIAT           | 0,27  | -0,19 | -0,46 | 0,004 | 0,523 |
| A_33_P3276301  |                | 0,31  | -0,15 | -0,46 | 0,006 | 0,568 |
| A_33_P3261595  | ANKRD34B       | 0,12  | -0,34 | -0,46 | 0,020 | 0,673 |
| A_23_P212042   | MFI2           | 0,35  | -0,11 | -0,46 | 0,017 | 0,660 |
| A_33_P3289491  | LOC100129069   | 0,33  | -0,13 | -0,46 | 0,015 | 0,647 |
| A_33_P3374478  | CASC4          | 0,06  | -0,40 | -0,46 | 0,035 | 0,738 |
| A_32_P793319   |                | 0,30  | -0,16 | -0,46 | 0,011 | 0,635 |
| A_24_P319736   | MEIS1          | 0,31  | -0,16 | -0,46 | 0,006 | 0,568 |
| A_33_P3214012  | HMGCLL1        | 0,27  | -0,20 | -0,47 | 0,014 | 0,647 |
| A_21_P0006206  | XLOC_007509    | 0,37  | -0,10 | -0,47 | 0,012 | 0,635 |
| A_21_P0005738  | XLOC_006879    | 0,29  | -0,18 | -0,47 | 0,002 | 0,474 |
| A_23_P83634    | ALOX12B        | 0,44  | -0,03 | -0,47 | 0,016 | 0,655 |
| A_24_P349274   | OR4X2          | 0,14  | -0,33 | -0,47 | 0,031 | 0,727 |
| A_23_P164958   | CCDC8          | 0,39  | -0,08 | -0,48 | 0,029 | 0,727 |
| A_33_P3390778  | TRIM46         | 0,05  | -0,43 | -0,48 | 0,040 | 0,761 |
| A_24_P357847   |                | 0,12  | -0,36 | -0,48 | 0,033 | 0,733 |
| A_33_P3412349  | ZNF268         | 0,42  | -0,06 | -0,48 | 0,004 | 0,523 |
| A_23_P413285   | CC2D2A         | 0,44  | -0,04 | -0,48 | 0,028 | 0,719 |
| A_21_P0010621  | XLOC_I2_000941 | 0,35  | -0,12 | -0,48 | 0,003 | 0,498 |
| A_23_P253123   | VGLL1          | 0,22  | -0,26 | -0,48 | 0,016 | 0,652 |
| A_21_P0005195  | XLOC_006193    | 0,28  | -0,20 | -0,48 | 0,012 | 0,635 |
| A_19_P00316808 | LOC100129936   | 0,23  | -0,26 | -0,48 | 0,023 | 0,696 |
| A_33_P3221090  | GPR156         | 0,21  | -0,27 | -0,48 | 0,011 | 0,635 |
| A_33_P3252539  | HIGD1C         | 0,33  | -0,15 | -0,48 | 0,034 | 0,734 |
| A_21_P0007473  | XLOC_009604    | 0,29  | -0,20 | -0,49 | 0,025 | 0,699 |
| A_23_P359214   | LOC643650      | 0,38  | -0,10 | -0,49 | 0,010 | 0,635 |
| A_23_P123622   | NPR2           | 0,15  | -0,34 | -0,49 | 0,001 | 0,458 |
| A_33_P3309734  | CCDC108        | -0,06 | -0,55 | -0,49 | 0,024 | 0,698 |
| A_33_P3346338  | WDR67          | 0,21  | -0,27 | -0,49 | 0,009 | 0,619 |
| A_32_P351277   | LOC440330      | 0,22  | -0,27 | -0,49 | 0,027 | 0,711 |
| A_21_P0013254  | XLOC_I2_013506 | 0,26  | -0,24 | -0,49 | 0,006 | 0,564 |
| A_21_P0002476  | XLOC_002221    | -0,01 | -0,50 | -0,49 | 0,016 | 0,656 |
| A_23_P392470   | NR3C2          | 0,33  | -0,17 | -0,49 | 0,019 | 0,668 |
| A_33_P3329063  | NCR1           | 0,10  | -0,40 | -0,49 | 0,003 | 0,507 |
| A_33_P3342195  |                | 0,33  | -0,16 | -0,50 | 0,023 | 0,695 |
| A_21_P0005978  | XLOC_007237    | 0,28  | -0,21 | -0,50 | 0,015 | 0,647 |
| A_21_P0014136  | LOC100506024   | 0,47  | -0,03 | -0,50 | 0,006 | 0,568 |
| A_21_P0006782  | XLOC_008907    | 0,18  | -0,32 | -0,50 | 0,029 | 0,727 |
| A_33_P3424010  |                | 0,26  | -0,24 | -0,50 | 0,037 | 0,741 |
| A_33_P3257130  | OR4M1          | 0,10  | -0,40 | -0,50 | 0,010 | 0,632 |
| A_21_P0012960  | LOC255187      | 0,33  | -0,17 | -0,50 | 0,048 | 0,776 |
| A_33_P3279362  | GRIK1-AS1      | 0,03  | -0,47 | -0,50 | 0,031 | 0,727 |
| A_23_P98147    | CPN1           | 0,33  | -0,18 | -0,50 | 0,016 | 0,652 |
| A_33_P3405966  | ST3GAL3        | 0,06  | -0,44 | -0,50 | 0,044 | 0,761 |
| A_33_P3318490  | PDZRN3         | 0,30  | -0,21 | -0,50 | 0,033 | 0,733 |
| A_23_P253602   | BMX            | 0,07  | -0,43 | -0,50 | 0,025 | 0,701 |

|                |                |      |       |       |       |       |
|----------------|----------------|------|-------|-------|-------|-------|
| A_19_P00320144 | XLOC_003428    | 0,35 | -0,16 | -0,51 | 0.014 | 0.647 |
| A_33_P3311165  | FLJ44313       | 0,36 | -0,15 | -0,51 | 0.023 | 0.695 |
| A_21_P0007368  | XLOC_009494    | 0,57 | 0,06  | -0,51 | 0.043 | 0.761 |
| A_21_P0002608  | XLOC_001641    | 0,37 | -0,15 | -0,51 | 0.036 | 0.738 |
| A_33_P3268652  | SLC2A11        | 0,30 | -0,21 | -0,52 | 0.020 | 0.672 |
| A_21_P0014414  | LOC100506369   | 0,25 | -0,26 | -0,52 | 0.017 | 0.661 |
| A_19_P00319133 | XLOC_004558    | 0,37 | -0,15 | -0,52 | 0.034 | 0.734 |
| A_33_P3404989  | HIST1H3H       | 0,35 | -0,17 | -0,52 | 0.023 | 0.695 |
| A_33_P3325704  | SPRR2E         | 0,18 | -0,35 | -0,52 | 0.004 | 0.523 |
| A_21_P0005344  | XLOC_005955    | 0,13 | -0,40 | -0,52 | 0.038 | 0.756 |
| A_24_P238543   | PHKA1          | 0,23 | -0,30 | -0,53 | 0.033 | 0.733 |
| A_21_P0008716  | XLOC_011413    | 0,32 | -0,21 | -0,53 | 0.009 | 0.625 |
| A_33_P3797403  | LOC283387      | 0,10 | -0,43 | -0,53 | 0.010 | 0.634 |
| A_33_P3237201  | SYT1           | 0,17 | -0,36 | -0,53 | 0.009 | 0.619 |
| A_33_P3358745  | SEPP1          | 0,36 | -0,17 | -0,53 | 0.044 | 0.761 |
| A_24_P758256   |                | 0,24 | -0,29 | -0,53 | 0.004 | 0.523 |
| A_33_P3238433  | ALDH3A1        | 0,27 | -0,26 | -0,53 | 0.021 | 0.683 |
| A_23_P51039    | INHA           | 0,45 | -0,09 | -0,53 | 0.005 | 0.551 |
| A_21_P0007667  | XLOC_009945    | 0,30 | -0,24 | -0,53 | 0.025 | 0.699 |
| A_33_P3361348  | ALOX15         | 0,18 | -0,35 | -0,53 | 0.027 | 0.719 |
| A_33_P3397520  | KRTAP10-12     | 0,31 | -0,23 | -0,54 | 0.008 | 0.602 |
| A_33_P3235721  | C11orf87       | 0,35 | -0,18 | -0,54 | 0.028 | 0.720 |
| A_23_P358597   | POPDC3         | 0,10 | -0,44 | -0,54 | 0.014 | 0.647 |
| A_33_P3286789  |                | 0,24 | -0,31 | -0,54 | 0.018 | 0.661 |
| A_21_P0003584  | XLOC_003479    | 0,24 | -0,30 | -0,54 | 0.009 | 0.614 |
| A_21_P0014401  | LOC100505944   | 0,24 | -0,31 | -0,54 | 0.023 | 0.695 |
| A_33_P3385281  | KCNG3          | 0,22 | -0,33 | -0,54 | 0.005 | 0.529 |
| A_21_P0012140  | FAM182B        | 0,22 | -0,32 | -0,55 | 0.003 | 0.500 |
| A_21_P0012700  | XLOC_I2_011407 | 0,49 | -0,06 | -0,55 | 0.012 | 0.639 |
| A_23_P336060   |                | 0,36 | -0,19 | -0,55 | 0.014 | 0.647 |
| A_33_P3285271  | FMO6P          | 0,14 | -0,42 | -0,55 | 0.013 | 0.647 |
| A_23_P40240    | CTSZ           | 0,17 | -0,39 | -0,56 | 0.031 | 0.727 |
| A_21_P0004147  | XLOC_004896    | 0,27 | -0,28 | -0,56 | 0.037 | 0.745 |
| A_23_P158925   | GPR125         | 0,37 | -0,19 | -0,56 | 0.016 | 0.656 |
| A_19_P00318740 | Q9B8G3         | 0,21 | -0,35 | -0,56 | 0.006 | 0.560 |
| A_33_P3411279  | CYP21A2        | 0,16 | -0,40 | -0,56 | 0.031 | 0.727 |
| A_19_P00320251 | LOC100505702   | 0,24 | -0,32 | -0,57 | 0.004 | 0.523 |
| A_23_P71328    | MATN2          | 0,67 | 0,10  | -0,57 | 0.036 | 0.740 |
| A_24_P242581   | SLC5A9         | 0,30 | -0,27 | -0,57 | 0.025 | 0.699 |
| A_24_P286569   | LANCL2         | 0,45 | -0,12 | -0,57 | 0.031 | 0.727 |
| A_33_P3382031  | TMEM236        | 0,13 | -0,44 | -0,57 | 0.035 | 0.738 |
| A_21_P0013944  | LOC100289090   | 0,30 | -0,27 | -0,57 | 0.033 | 0.733 |
| A_33_P3282213  |                | 0,31 | -0,26 | -0,57 | 0.017 | 0.661 |
| A_21_P0014815  | LOC646778      | 0,30 | -0,27 | -0,57 | 0.003 | 0.507 |
| A_33_P3543013  | OR5AK4P        | 0,14 | -0,43 | -0,57 | 0.004 | 0.523 |
| A_33_P3414472  |                | 0,12 | -0,45 | -0,57 | 0.026 | 0.704 |
| A_24_P259154   | MGC16703       | 0,17 | -0,40 | -0,57 | 0.024 | 0.696 |
| A_21_P0005963  | LOC100507420   | 0,38 | -0,19 | -0,58 | 0.023 | 0.695 |
| A_21_P0001988  | XLOC_001932    | 0,20 | -0,38 | -0,58 | 0.022 | 0.686 |
| A_23_P326157   | GAL3ST2        | 0,27 | -0,31 | -0,58 | 0.016 | 0.653 |

|                |                |      |       |       |        |       |
|----------------|----------------|------|-------|-------|--------|-------|
| A_23_P144394   | CSN2           | 0,14 | -0,44 | -0,58 | 0.028  | 0.725 |
| A_23_P380614   | ATP9A          | 0,12 | -0,46 | -0,58 | 0.007  | 0.583 |
| A_21_P0007689  | XLOC_010023    | 0,34 | -0,25 | -0,59 | 0.007  | 0.583 |
| A_33_P3352995  | IFITM5         | 0,30 | -0,29 | -0,59 | 0.044  | 0.761 |
| A_33_P3233229  |                | 0,40 | -0,19 | -0,59 | <0.001 | 0.269 |
| A_23_P205867   | NR2E3          | 0,01 | -0,58 | -0,59 | 0.017  | 0.660 |
| A_33_P3299696  | FAM75D3        | 0,43 | -0,16 | -0,59 | 0.019  | 0.668 |
| A_33_P3246703  |                | 0,24 | -0,35 | -0,60 | 0.020  | 0.669 |
| A_19_P00321158 |                | 0,21 | -0,39 | -0,60 | 0.010  | 0.635 |
| A_19_P00321319 | Q07610         | 0,15 | -0,45 | -0,60 | 0.011  | 0.635 |
| A_33_P3209200  |                | 0,35 | -0,25 | -0,60 | 0.016  | 0.656 |
| A_21_P0005897  | XLOC_007197    | 0,32 | -0,28 | -0,60 | 0.036  | 0.740 |
| A_33_P3385732  | OR52L1         | 0,15 | -0,45 | -0,60 | 0.005  | 0.553 |
| A_33_P3233100  |                | 0,21 | -0,39 | -0,60 | 0.011  | 0.635 |
| A_33_P3254670  |                | 0,08 | -0,53 | -0,61 | 0.027  | 0.717 |
| A_21_P0009341  | LOC645638      | 0,20 | -0,41 | -0,61 | 0.001  | 0.458 |
| A_21_P0005680  | XLOC_006764    | 0,29 | -0,32 | -0,61 | 0.015  | 0.647 |
| A_21_P0012937  | AACSP1         | 0,28 | -0,33 | -0,61 | 0.029  | 0.727 |
| A_21_P0010560  | XLOC_I2_000423 | 0,34 | -0,27 | -0,62 | 0.033  | 0.733 |
| A_21_P0011018  | POU2AF1        | 0,22 | -0,40 | -0,62 | 0.001  | 0.422 |
| A_23_P5785     | BBS5           | 0,29 | -0,33 | -0,62 | 0.001  | 0.422 |
| A_21_P0002347  | XLOC_001855    | 0,45 | -0,17 | -0,63 | 0.002  | 0.474 |
| A_21_P0005260  | XLOC_006245    | 0,81 | 0,19  | -0,63 | 0.025  | 0.699 |
| A_21_P0006425  | XLOC_008003    | 0,13 | -0,50 | -0,63 | 0.013  | 0.647 |
| A_24_P9346     | SYNGAP1        | 0,30 | -0,33 | -0,63 | 0.015  | 0.647 |
| A_21_P0005395  | XLOC_006151    | 0,43 | -0,20 | -0,63 | 0.012  | 0.635 |
| A_21_P0010071  | XLOC_013838    | 0,15 | -0,48 | -0,63 | 0.019  | 0.665 |
| A_21_P0010302  | XLOC_014119    | 0,22 | -0,41 | -0,63 | 0.012  | 0.636 |
| A_19_P00322925 | XLOC_005127    | 0,21 | -0,42 | -0,64 | <0.001 | 0.301 |
| A_23_P67151    | OLFM2          | 0,34 | -0,30 | -0,64 | 0.008  | 0.614 |
| A_33_P3326210  | ESCO2          | 0,00 | -0,64 | -0,64 | 0.023  | 0.696 |
| A_33_P3420500  | ZDHHC20        | 0,16 | -0,49 | -0,64 | 0.041  | 0.761 |
| A_21_P0004290  | XLOC_004536    | 0,45 | -0,19 | -0,64 | 0.005  | 0.544 |
| A_24_P127564   | LINC00085      | 0,17 | -0,47 | -0,64 | 0.020  | 0.669 |
| A_23_P319557   |                | 0,28 | -0,36 | -0,65 | 0.009  | 0.625 |
| A_21_P0002632  | XLOC_001910    | 0,19 | -0,46 | -0,65 | 0.002  | 0.461 |
| A_24_P943922   | CACHD1         | 0,35 | -0,31 | -0,65 | 0.014  | 0.647 |
| A_19_P00315529 | XLOC_008370    | 0,40 | -0,26 | -0,65 | 0.015  | 0.647 |
| A_33_P3320112  |                | 0,32 | -0,34 | -0,66 | 0.018  | 0.661 |
| A_21_P0008371  | XLOC_010897    | 0,28 | -0,37 | -0,66 | 0.010  | 0.635 |
| A_33_P3780572  | LOC401164      | 0,33 | -0,33 | -0,66 | 0.004  | 0.523 |
| A_21_P0006095  | XLOC_007814    | 0,29 | -0,37 | -0,66 | 0.007  | 0.583 |
| A_23_P132175   | RTN4R          | 0,34 | -0,33 | -0,67 | 0.009  | 0.614 |
| A_21_P0000526  | ZSCAN18        | 0,31 | -0,36 | -0,67 | 0.001  | 0.422 |
| A_23_P36641    | AICDA          | 0,05 | -0,62 | -0,68 | 0.035  | 0.738 |
| A_23_P385911   | CEP44          | 0,55 | -0,13 | -0,68 | <0.001 | 0.370 |
| A_23_P15692    | GPR172B        | 0,41 | -0,28 | -0,69 | 0.012  | 0.636 |
| A_21_P0014056  | DCAF8          | 0,37 | -0,32 | -0,69 | 0.004  | 0.523 |
| A_23_P320862   | C9orf43        | 0,33 | -0,36 | -0,69 | 0.023  | 0.696 |
| A_33_P3356492  |                | 0,29 | -0,41 | -0,69 | 0.008  | 0.602 |

|                |                |      |       |       |        |       |
|----------------|----------------|------|-------|-------|--------|-------|
| A_33_P3239298  | PRODH          | 0,38 | -0,32 | -0,70 | 0.001  | 0.458 |
| A_33_P3261953  |                | 0,34 | -0,36 | -0,70 | 0.006  | 0.560 |
| A_21_P0008995  | XLOC_011826    | 0,27 | -0,43 | -0,70 | 0.005  | 0.544 |
| A_33_P3275674  |                | 0,27 | -0,43 | -0,70 | 0.007  | 0.575 |
| A_24_P925062   | MXRA7          | 0,27 | -0,44 | -0,70 | 0.013  | 0.647 |
| A_21_P0003200  | XLOC_003365    | 0,51 | -0,19 | -0,70 | 0.002  | 0.486 |
| A_32_P115050   | LOC646576      | 0,41 | -0,30 | -0,71 | 0.008  | 0.596 |
| A_33_P3411313  |                | 0,28 | -0,43 | -0,71 | 0.014  | 0.647 |
| A_21_P0007072  | XLOC_008574    | 0,49 | -0,23 | -0,72 | 0.027  | 0.711 |
| A_21_P0005611  | XLOC_006625    | 0,51 | -0,21 | -0,72 | <0.001 | 0.387 |
| A_21_P0004536  | XLOC_004632    | 0,29 | -0,44 | -0,72 | 0.021  | 0.683 |
| A_21_P0013026  | XLOC_I2_012578 | 0,64 | -0,10 | -0,73 | 0.012  | 0.636 |
| A_24_P289273   | RGR            | 0,25 | -0,49 | -0,74 | 0.008  | 0.596 |
| A_23_P32165    | LHX2           | 0,50 | -0,25 | -0,75 | 0.004  | 0.529 |
| A_33_P3352011  |                | 0,09 | -0,66 | -0,75 | 0.004  | 0.523 |
| A_21_P0012961  | LOC255187      | 0,56 | -0,19 | -0,75 | 0.004  | 0.523 |
| A_33_P3252441  |                | 0,35 | -0,40 | -0,76 | 0.007  | 0.583 |
| A_33_P3421703  | SP2            | 0,45 | -0,31 | -0,76 | 0.033  | 0.733 |
| A_21_P0007323  | XLOC_009385    | 0,45 | -0,32 | -0,77 | 0.008  | 0.602 |
| A_21_P0010580  | XLOC_I2_000657 | 0,49 | -0,28 | -0,77 | 0.043  | 0.761 |
| A_21_P0000978  | XLOC_000214    | 0,32 | -0,45 | -0,77 | 0.005  | 0.529 |
| A_21_P0000120  | KCNJ18         | 0,17 | -0,61 | -0,78 | 0.045  | 0.761 |
| A_33_P3372727  | SEMA5A         | 0,54 | -0,25 | -0,79 | 0.006  | 0.572 |
| A_21_P0004459  | XLOC_005052    | 0,55 | -0,26 | -0,81 | 0.003  | 0.500 |
| A_33_P3357283  |                | 0,46 | -0,36 | -0,82 | 0.001  | 0.458 |
| A_33_P3271001  | NIPSNAP3B      | 0,49 | -0,34 | -0,84 | <0.001 | 0.387 |
| A_21_P0007622  | XLOC_009872    | 0,30 | -0,55 | -0,85 | 0.001  | 0.422 |
| A_33_P3262685  | POM121L1P      | 0,09 | -0,77 | -0,86 | 0.005  | 0.544 |
| A_19_P00320562 | P39189         | 0,35 | -0,51 | -0,87 | 0.024  | 0.699 |
| A_23_P301476   | C3orf33        | 0,41 | -0,50 | -0,91 | 0.001  | 0.445 |
| A_23_P258483   | ANKRD55        | 0,08 | -0,85 | -0,93 | <0.001 | 0.237 |
| A_23_P309207   | ZNF577         | 0,14 | -0,82 | -0,96 | 0.041  | 0.761 |
| A_32_P176911   | LINC00239      | 0,48 | -0,48 | -0,96 | 0.014  | 0.647 |
| A_33_P3351259  | LOC100130560   | 0,31 | -0,66 | -0,98 | <0.001 | 0.237 |
| A_23_P43337    | FREM1          | 0,29 | -0,69 | -0,99 | 0.042  | 0.761 |
| A_33_P3355926  | LOC100130894   | 0,66 | -0,36 | -1,02 | 0.001  | 0.458 |

## Supplemental Table 8 – Cross-sectional analyses

The tables shows the transcripts that were differentially regulated at baseline (Table 8a) and at +180 minutes post stress (Table 8b).

The *p*-values result from the limma *t*-test. The *p*-values were multiplicity-adjusted to control the false discovery rate (FDR) by the Benjamini–Hochberg procedure.

### A: Baseline Expression Differences

| Agilent Probe ID | Gene Symbol    | Delta log2 expression values<br>Control Group – Early Trauma | p-value | adj. p-value |
|------------------|----------------|--------------------------------------------------------------|---------|--------------|
| A_33_P3420235    | ARPC5          | 0,70                                                         | 0.009   | 0.960        |
| A_33_P3263319    |                | 0,69                                                         | 0.003   | 0.960        |
| A_24_P655458     | TREML4         | 0,68                                                         | 0.021   | 0.960        |
| A_33_P3297020    | PSORS1C3       | 0,56                                                         | 0.022   | 0.960        |
| A_24_P928052     | NRP1           | 0,49                                                         | 0.003   | 0.960        |
| A_21_P0008692    | XLOC_011379    | 0,48                                                         | 0.023   | 0.978        |
| A_23_P61042      |                | 0,47                                                         | 0.013   | 0.960        |
| A_33_P3351180    |                | 0,46                                                         | 0.038   | 0.990        |
| A_21_P0000989    | XLOC_000268    | 0,46                                                         | 0.004   | 0.960        |
| A_33_P3326667    |                | 0,45                                                         | 0.013   | 0.960        |
| A_33_P3373598    | TREML2P1       | 0,45                                                         | 0.011   | 0.960        |
| A_33_P3391339    |                | 0,44                                                         | 0.010   | 0.960        |
| A_23_P114299     | CXCR3          | 0,44                                                         | 0.041   | 0.990        |
| A_33_P3226154    |                | 0,40                                                         | 0.016   | 0.960        |
| A_24_P458479     |                | 0,39                                                         | 0.003   | 0.960        |
| A_23_P42241      | OR5V1          | 0,39                                                         | 0.006   | 0.960        |
| A_24_P135322     | NRP1           | 0,38                                                         | <0.001  | 0.935        |
| A_32_P9543       | APOBEC3A       | 0,37                                                         | 0.050   | 0.990        |
| A_33_P3768930    |                | 0,36                                                         | 0.031   | 0.988        |
| A_21_P0003476    | XLOC_003976    | 0,36                                                         | 0.014   | 0.960        |
| A_24_P605563     |                | 0,35                                                         | 0.030   | 0.988        |
| A_21_P0002580    | DNAJC27-AS1    | 0,35                                                         | 0.022   | 0.960        |
| A_21_P0001856    | XLOC_001452    | 0,35                                                         | 0.007   | 0.960        |
| A_21_P0012146    | XLOC_I2_008609 | 0,34                                                         | <0.001  | 0.935        |
| A_19_P00802433   | XLOC_005327    | 0,33                                                         | 0.025   | 0.978        |
| A_21_P0013697    | XLOC_I2_014797 | 0,33                                                         | 0.017   | 0.960        |
| A_33_P3424612    | LOC100653210   | 0,32                                                         | 0.005   | 0.960        |
| A_23_P129103     | AGSK1          | 0,32                                                         | 0.030   | 0.988        |
| A_24_P272451     | C17orf87       | 0,32                                                         | 0.039   | 0.990        |
| A_32_P112623     | FAM27E3        | 0,32                                                         | 0.017   | 0.960        |
| A_21_P0008511    | XLOC_010811    | 0,32                                                         | 0.005   | 0.960        |
| A_21_P0007924    | XLOC_010308    | 0,31                                                         | 0.023   | 0.969        |
| A_24_P23921      | C17orf98       | 0,31                                                         | 0.002   | 0.960        |
| A_21_P0009450    | XLOC_012621    | 0,31                                                         | 0.002   | 0.960        |
| A_21_P0014079    | C1orf61        | 0,31                                                         | 0.014   | 0.960        |
| A_21_P0009578    | XLOC_012880    | 0,30                                                         | 0.021   | 0.960        |
| A_33_P3334180    | PLCH2          | 0,30                                                         | 0.001   | 0.960        |

|               |                |       |       |       |
|---------------|----------------|-------|-------|-------|
| A_21_P0005208 | XLOC_005979    | 0,29  | 0.014 | 0.960 |
| A_23_P330419  | ACPT           | 0,29  | 0.011 | 0.960 |
| A_21_P0000510 | GOLGA2P5       | 0,29  | 0.010 | 0.960 |
| A_33_P3311205 | PRPF40B        | 0,29  | 0.023 | 0.969 |
| A_23_P66827   | FAM106A        | 0,29  | 0.039 | 0.990 |
| A_23_P209360  | KLHL29         | 0,29  | 0.011 | 0.960 |
| A_23_P41344   | EREG           | 0,28  | 0.049 | 0.990 |
| A_23_P207537  | DUSP14         | 0,28  | 0.046 | 0.990 |
| A_33_P3241786 | ADD2           | 0,28  | 0.025 | 0.978 |
| A_33_P3306948 | LRP6           | 0,28  | 0.006 | 0.960 |
| A_21_P0002594 | XLOC_001457    | 0,28  | 0.007 | 0.960 |
| A_21_P0013056 | XLOC_I2_012847 | 0,27  | 0.044 | 0.990 |
| A_21_P0004812 | XLOC_005119    | 0,27  | 0.018 | 0.960 |
| A_23_P434398  | TXLNB          | 0,27  | 0.027 | 0.988 |
| A_21_P0012896 | XLOC_I2_011987 | 0,27  | 0.028 | 0.988 |
| A_23_P429998  | FOSB           | 0,26  | 0.043 | 0.990 |
| A_33_P3233436 | PNMA6C         | 0,26  | 0.013 | 0.960 |
| A_23_P67785   | SPAG16         | -0,27 | 0.020 | 0.960 |
| A_21_P0003775 | XLOC_004093    | -0,27 | 0.021 | 0.960 |
| A_24_P324368  | DNAJC14        | -0,27 | 0.004 | 0.960 |
| A_21_P0001016 | XLOC_000391    | -0,27 | 0.003 | 0.960 |
| A_33_P3404989 | HIST1H3H       | -0,28 | 0.010 | 0.960 |
| A_21_P0009272 | XLOC_012307    | -0,28 | 0.033 | 0.988 |
| A_33_P3382351 | RNASEK         | -0,29 | 0.028 | 0.988 |
| A_23_P76731   | MOK            | -0,29 | 0.003 | 0.960 |
| A_21_P0002632 | XLOC_001910    | -0,30 | 0.001 | 0.955 |
| A_21_P0005195 | XLOC_006193    | -0,30 | 0.009 | 0.960 |
| A_21_P0012626 | XLOC_I2_010897 | -0,30 | 0.016 | 0.960 |
| A_21_P0000978 | XLOC_000214    | -0,30 | 0.014 | 0.960 |
| A_33_P3340752 | LOC100130887   | -0,31 | 0.016 | 0.960 |
| A_23_P2006    | CNGA4          | -0,31 | 0.005 | 0.960 |
| A_23_P32165   | LHX2           | -0,33 | 0.007 | 0.960 |
| A_24_P319736  | MEIS1          | -0,33 | 0.003 | 0.960 |
| A_21_P0005611 | XLOC_006625    | -0,33 | 0.010 | 0.960 |
| A_33_P3239298 | PRODH          | -0,33 | 0.001 | 0.935 |
| A_33_P3373446 | LOC100507505   | -0,34 | 0.002 | 0.960 |
| A_33_P3411279 | CYP21A2        | -0,35 | 0.005 | 0.960 |
| A_24_P344516  | ZNF702P        | -0,37 | 0.031 | 0.988 |
| A_33_P3358104 | CD300E         | -0,37 | 0.004 | 0.960 |
| A_33_P3391476 | CRYZ           | -0,39 | 0.020 | 0.960 |
| A_21_P0013995 | LOC100293977   | -0,45 | 0.014 | 0.960 |
| A_21_P0000120 | KCNJ18         | -0,50 | 0.024 | 0.978 |
| A_33_P3318766 |                | -0,51 | 0.034 | 0.989 |
| A_33_P3261595 | ANKRD34B       | -0,55 | 0.003 | 0.960 |
| A_32_P78816   | PSPH           | -0,64 | 0.002 | 0.960 |
| A_23_P136683  | HLA-DQB1       | -0,89 | 0.044 | 0.990 |



|               |        |       |       |       |
|---------------|--------|-------|-------|-------|
| A_21_P0013198 | PSPHP1 | -1,70 | 0.002 | 0.960 |
|---------------|--------|-------|-------|-------|

B: Expression Differences +180 minutes post-stress

| Agilent Probe ID | Gene Symbol    | Delta log2 expression values<br>Control Group – Early Trauma | p-value | adj. p-value |
|------------------|----------------|--------------------------------------------------------------|---------|--------------|
| A_33_P3420235    | ARPC5          | 0,67                                                         | 0.017   | 1.000        |
| A_21_P0000989    | XLOC_000268    | 0,57                                                         | <0.001  | 0.722        |
| A_33_P3351180    |                | 0,56                                                         | 0.006   | 0.993        |
| A_24_P357847     |                | 0,56                                                         | 0.009   | 1.000        |
| A_33_P3263319    |                | 0,53                                                         | 0.013   | 1.000        |
| A_21_P0003854    | XLOC_003734    | 0,51                                                         | 0.008   | 1.000        |
| A_24_P170439     | TREML3         | 0,48                                                         | 0.029   | 1.000        |
| A_24_P928052     | NRP1           | 0,46                                                         | 0.008   | 1.000        |
| A_33_P3297020    | PSORS1C3       | 0,45                                                         | 0.047   | 1.000        |
| A_23_P61042      |                | 0,44                                                         | 0.014   | 1.000        |
| A_23_P258483     | ANKRD55        | 0,44                                                         | <0.001  | 0.671        |
| A_23_P398275     | LOC388152      | 0,43                                                         | 0.005   | 0.991        |
| A_24_P127564     | LINC00085      | 0,41                                                         | 0.031   | 1.000        |
| A_33_P3226154    |                | 0,40                                                         | 0.029   | 1.000        |
| A_23_P21800      |                | 0,40                                                         | 0.048   | 1.000        |
| A_33_P3337609    |                | 0,40                                                         | 0.026   | 1.000        |
| A_23_P380614     | ATP9A          | 0,40                                                         | 0.012   | 1.000        |
| A_33_P3227774    | AGSK1          | 0,39                                                         | 0.020   | 1.000        |
| A_32_P112623     | FAM27E3        | 0,39                                                         | 0.005   | 0.991        |
| A_21_P0013697    | XLOC_I2_014797 | 0,38                                                         | 0.003   | 0.879        |
| A_33_P3423874    | MYZAP          | 0,38                                                         | 0.017   | 1.000        |
| A_23_P129103     | AGSK1          | 0,38                                                         | 0.011   | 1.000        |
| A_21_P0013944    | LOC100289090   | 0,37                                                         | <0.001  | 0.671        |
| A_23_P157795     | CTNNAL1        | 0,36                                                         | 0.017   | 1.000        |
| A_32_P176911     | LINC00239      | 0,36                                                         | 0.025   | 1.000        |
| A_23_P29096      | PDE9A          | 0,35                                                         | 0.003   | 0.879        |
| A_23_P309207     | ZNF577         | 0,35                                                         | 0.010   | 1.000        |
| A_33_P3382229    | TNNT3          | 0,34                                                         | 0.017   | 1.000        |
| A_21_P0006788    | LOC100505869   | 0,33                                                         | 0.029   | 1.000        |
| A_24_P135322     | NRP1           | 0,33                                                         | 0.003   | 0.879        |
| A_23_P257417     | C2orf63        | 0,33                                                         | 0.011   | 1.000        |
| A_21_P0009342    | LOC645638      | 0,33                                                         | 0.013   | 1.000        |
| A_32_P196142     | LOC100130938   | 0,32                                                         | 0.019   | 1.000        |
| A_23_P149368     | FCRL1          | 0,32                                                         | 0.023   | 1.000        |
| A_21_P0011214    | XLOC_I2_003897 | 0,32                                                         | 0.037   | 1.000        |
| A_21_P0006410    | XLOC_007911    | 0,31                                                         | 0.044   | 1.000        |
| A_24_P458479     |                | 0,31                                                         | 0.013   | 1.000        |
| A_23_P207537     | DUSP14         | 0,30                                                         | 0.027   | 1.000        |
| A_23_P418597     | TNKS1BP1       | 0,30                                                         | 0.001   | 0.819        |
| A_21_P0012274    | XLOC_I2_009441 | 0,30                                                         | 0.014   | 1.000        |

|                |                |       |        |       |
|----------------|----------------|-------|--------|-------|
| A_21_P0014663  | ZNF605         | 0,29  | <0.001 | 0.671 |
| A_21_P0009341  | LOC645638      | 0,29  | 0.003  | 0.879 |
| A_33_P3226955  | NRP1           | 0,28  | 0.044  | 1.000 |
| A_23_P127824   | TNNT3          | 0,28  | 0.011  | 1.000 |
| A_21_P0005260  | XLOC_006245    | 0,28  | 0.011  | 1.000 |
| A_23_P123622   | NPR2           | 0,28  | 0.001  | 0.722 |
| A_21_P0005101  | XLOC_005126    | 0,27  | 0.039  | 1.000 |
| A_23_P301476   | C3orf33        | 0,27  | 0.003  | 0.879 |
| A_21_P0013086  | LOC728052      | 0,27  | 0.038  | 1.000 |
| A_33_P3369844  | CD24           | 0,27  | 0.045  | 1.000 |
| A_33_P3424591  |                | 0,27  | 0.004  | 0.948 |
| A_21_P0003212  | XLOC_003406    | 0,27  | 0.008  | 1.000 |
| A_33_P3245674  | ZNF329         | -0,27 | 0.002  | 0.879 |
| A_21_P0010713  | XLOC_I2_000353 | -0,27 | 0.001  | 0.819 |
| A_23_P322395   | ZSCAN1         | -0,27 | 0.005  | 0.991 |
| A_21_P0001643  | XLOC_001263    | -0,27 | 0.003  | 0.879 |
| A_21_P0012626  | XLOC_I2_010897 | -0,27 | 0.040  | 1.000 |
| A_21_P0000973  | XLOC_000197    | -0,27 | 0.002  | 0.879 |
| A_21_P0006115  | XLOC_007888    | -0,28 | 0.027  | 1.000 |
| A_33_P3279610  | COX6A2         | -0,28 | 0.018  | 1.000 |
| A_33_P3335461  |                | -0,28 | 0.021  | 1.000 |
| A_33_P3244553  |                | -0,28 | 0.006  | 0.993 |
| A_21_P0011494  | XLOC_I2_005606 | -0,28 | 0.008  | 1.000 |
| A_19_P00321697 | LINC00313      | -0,29 | 0.002  | 0.879 |
| A_21_P0010313  | XLOC_013949    | -0,29 | 0.002  | 0.879 |
| A_32_P104063   | CRNDE          | -0,29 | 0.015  | 1.000 |
| A_21_P0009172  | XLOC_012240    | -0,29 | 0.007  | 0.993 |
| A_33_P3302563  | LOC100129408   | -0,29 | 0.020  | 1.000 |
| A_24_P49597    |                | -0,29 | 0.020  | 1.000 |
| A_24_P199500   | RNF2           | -0,29 | 0.010  | 1.000 |
| A_21_P0006253  | XLOC_007645    | -0,29 | 0.031  | 1.000 |
| A_33_P3382351  | RNASEK         | -0,30 | 0.028  | 1.000 |
| A_21_P0009578  | XLOC_012880    | -0,30 | 0.021  | 1.000 |
| A_21_P0013504  | XLOC_I2_014388 | -0,30 | 0.016  | 1.000 |
| A_33_P3317168  | EPS8L3         | -0,31 | <0.001 | 0.298 |
| A_24_P344516   | ZNF702P        | -0,32 | 0.042  | 1.000 |
| A_21_P0003286  | XLOC_003149    | -0,32 | <0.001 | 0.671 |
| A_23_P76731    | MOK            | -0,32 | 0.002  | 0.879 |
| A_21_P0009544  | XLOC_012812    | -0,32 | 0.003  | 0.879 |
| A_33_P3258546  | PCDHA5         | -0,33 | 0.008  | 1.000 |
| A_21_P0003793  | XLOC_004153    | -0,33 | 0.004  | 0.905 |
| A_33_P3431595  | C8orf31        | -0,33 | 0.029  | 1.000 |
| A_33_P3262069  | OR2AG2         | -0,33 | 0.003  | 0.879 |
| A_33_P3382111  |                | -0,34 | 0.008  | 1.000 |
| A_32_P128701   | USP53          | -0,35 | 0.004  | 0.942 |
| A_19_P00322498 | Q7VPR2         | -0,37 | 0.001  | 0.837 |

|               |              |       |       |       |
|---------------|--------------|-------|-------|-------|
| A_23_P86411   | MYO3A        | -0,37 | 0.006 | 0.993 |
| A_21_P0007422 | XLOC_009606  | -0,38 | 0.014 | 1.000 |
| A_33_P3358104 | CD300E       | -0,39 | 0.002 | 0.879 |
| A_21_P0005109 | XLOC_005180  | -0,42 | 0.001 | 0.819 |
| A_33_P3367681 |              | -0,43 | 0.001 | 0.879 |
| A_21_P0013995 | LOC100293977 | -0,48 | 0.007 | 0.993 |
| A_32_P78816   | PSPH         | -0,69 | 0.002 | 0.879 |
| A_23_P136683  | HLA-DQB1     | -0,94 | 0.032 | 1.000 |
| A_21_P0013198 | PSPHP1       | -1,68 | 0.003 | 0.879 |

## Supplemental Table X

The table shows the top 500 transcripts with significant differences between groups in the correlations between cortisol increases and gene expression. The *p*-values result from the comparison of the z-transformed correlation coefficients of the two groups (Spearman's rho). The *p*-values were multiplicity-adjusted to control the false discovery rate (FDR) by the Benjamini–Hochberg procedure.

| Agilent Probe ID | Gene Symbol    | rho Control Group | rho Early Adversity | p-value Control Group | p-value Early Adversity | p-value delta rho | adj. p-value |
|------------------|----------------|-------------------|---------------------|-----------------------|-------------------------|-------------------|--------------|
| A_24_P89971      | SURF4          | 0,74              | -0,46               | 0,00000522            | 0,0120769               | 0,0000001         | 0,002        |
| A_33_P3236661    | PCDH9          | 0,33              | -0,74               | 0,07465301            | 0,0000027               | 0,0000018         | 0,020        |
| A_23_P209978     | VSNL1          | 0,5               | -0,61               | 0,00591365            | 0,0003981               | 0,0000037         | 0,023        |
| A_33_P3297050    | ALG2           | 0,37              | -0,7                | 0,04467414            | 0,0000302               | 0,0000043         | 0,023        |
| A_23_P502470     | IL6ST          | 0,53              | -0,57               | 0,00277810            | 0,0013663               | 0,0000066         | 0,028        |
| A_33_P3216200    |                | -0,46             | 0,62                | 0,01216910            | 0,0003615               | 0,0000082         | 0,028        |
| A_23_P90296      | DYRK1B         | -0,44             | 0,63                | 0,01569652            | 0,0001995               | 0,0000091         | 0,028        |
| A_23_P135787     | GOLGB1         | -0,66             | 0,38                | 0,00009480            | 0,0412557               | 0,0000113         | 0,030        |
| A_24_P316601     | C9orf47        | 0,41              | -0,64               | 0,02683633            | 0,0001951               | 0,0000125         | 0,030        |
| A_32_P208403     | GNG2           | 0,56              | -0,49               | 0,00157605            | 0,0059638               | 0,0000160         | 0,030        |
| A_23_P131089     | KANK3          | -0,55             | 0,5                 | 0,00179538            | 0,0057165               | 0,0000175         | 0,030        |
| A_23_P422831     | FAM189A2       | 0,58              | -0,47               | 0,00105176            | 0,0094236               | 0,0000180         | 0,030        |
| A_33_P3324228    |                | -0,67             | 0,35                | 0,00008580            | 0,0613961               | 0,0000183         | 0,030        |
| A_23_P112798     | CRIP2          | -0,59             | 0,44                | 0,00078494            | 0,0154488               | 0,0000243         | 0,035        |
| A_23_P12140      | RPL5           | 0,54              | -0,5                | 0,00227836            | 0,0057165               | 0,0000264         | 0,035        |
| A_33_P3237744    | SGK110         | -0,43             | 0,59                | 0,01930417            | 0,0006791               | 0,0000277         | 0,035        |
| A_19_P00322219   | MIAT           | -0,36             | 0,64                | 0,05250445            | 0,0001733               | 0,0000280         | 0,035        |
| A_21_P0004007    | XLOC_004410    | 0,41              | -0,61               | 0,02623573            | 0,0005103               | 0,0000321         | 0,035        |
| A_33_P3245818    | PQLC1          | -0,42             | 0,59                | 0,02085212            | 0,0007182               | 0,0000322         | 0,035        |
| A_21_P0010752    | XLOC_I2_000727 | 0,5               | -0,52               | 0,00547798            | 0,0034935               | 0,0000341         | 0,035        |
| A_21_P0001688    | XLOC_000264    | 0,41              | -0,6                | 0,02683633            | 0,0004315               | 0,0000345         | 0,035        |

|               |                |       |       |            |           |           |       |
|---------------|----------------|-------|-------|------------|-----------|-----------|-------|
| A_24_P84808   |                | 0,51  | -0,51 | 0,00372148 | 0,0048975 | 0,0000366 | 0,035 |
| A_33_P3403162 | SLC18A1        | -0,64 | 0,36  | 0,00022495 | 0,0540683 | 0,0000372 | 0,035 |
| A_21_P0007145 | PPP2R5B        | -0,51 | 0,5   | 0,00372148 | 0,0053850 | 0,0000406 | 0,036 |
| A_21_P0005964 | XLOC_007064    | 0,57  | -0,43 | 0,00106494 | 0,0175996 | 0,0000468 | 0,039 |
| A_21_P0001625 | XLOC_001208    | 0,5   | -0,51 | 0,00557234 | 0,0042003 | 0,0000477 | 0,039 |
| A_21_P0003797 | XLOC_004165    | 0,69  | -0,25 | 0,00004070 | 0,1761152 | 0,0000490 | 0,039 |
| A_21_P0007820 | XLOC_009652    | 0,46  | -0,53 | 0,01081525 | 0,0023362 | 0,0000600 | 0,046 |
| A_23_P350689  | ZDHHC23        | -0,55 | 0,44  | 0,00208105 | 0,0148876 | 0,0000659 | 0,047 |
| A_23_P354175  | TMEM129        | 0,5   | -0,48 | 0,00494016 | 0,0068844 | 0,0000698 | 0,047 |
| A_24_P76995   | ZDHHC17        | 0,48  | -0,51 | 0,00803108 | 0,0046074 | 0,0000701 | 0,047 |
| A_21_P0011788 | XLOC_I2_007167 | 0,47  | -0,52 | 0,00961106 | 0,0033060 | 0,0000741 | 0,047 |
| A_24_P400376  | CHCHD2         | 0,62  | -0,34 | 0,00035281 | 0,0656624 | 0,0000745 | 0,047 |
| A_21_P0013258 | XLOC_I2_013532 | 0,54  | -0,45 | 0,00259573 | 0,0144590 | 0,0000750 | 0,047 |
| A_23_P364437  | CDH23          | -0,72 | 0,17  | 0,00000845 | 0,3619599 | 0,0000793 | 0,047 |
| A_23_P323751  | FAM83D         | 0,45  | -0,53 | 0,01332229 | 0,0030158 | 0,0000796 | 0,047 |
| A_33_P3270136 | LOC100130157   | 0,55  | -0,42 | 0,00183138 | 0,0225020 | 0,0000890 | 0,050 |
| A_23_P319492  | FAM118B        | 0,63  | -0,32 | 0,00022076 | 0,0849683 | 0,0000907 | 0,050 |
| A_32_P113154  |                | 0,57  | -0,39 | 0,00092434 | 0,0339537 | 0,0000920 | 0,050 |
| A_33_P3227857 | COX18          | -0,67 | 0,25  | 0,00008220 | 0,1816274 | 0,0000940 | 0,050 |
| A_21_P0003603 | XLOC_003514    | -0,6  | 0,35  | 0,00062043 | 0,0559937 | 0,0000996 | 0,052 |
| A_33_P3225512 | OAS2           | -0,5  | 0,46  | 0,00475256 | 0,0105981 | 0,0001094 | 0,054 |
| A_33_P3316953 | RBFOX3         | 0,42  | -0,54 | 0,02114437 | 0,0024518 | 0,0001103 | 0,054 |
| A_23_P89431   | CCL2           | -0,7  | 0,17  | 0,00002340 | 0,3569508 | 0,0001112 | 0,054 |
| A_33_P3236632 | MIA3           | -0,42 | 0,54  | 0,02090045 | 0,0025712 | 0,0001193 | 0,056 |
| A_33_P3337574 | FGF14-IT1      | 0,43  | -0,53 | 0,01850106 | 0,0027376 | 0,0001202 | 0,056 |
| A_33_P3394366 | DKFZp686A05212 | -0,46 | 0,5   | 0,01189437 | 0,0054780 | 0,0001294 | 0,058 |
| A_21_P0002564 | XLOC_001314    | -0,48 | 0,48  | 0,00822802 | 0,0081619 | 0,0001320 | 0,058 |
| A_23_P150255  | RBM14          | -0,39 | 0,56  | 0,03395375 | 0,0013913 | 0,0001326 | 0,058 |
| A_33_P3277913 | MAP2           | -0,36 | 0,58  | 0,05099989 | 0,0009759 | 0,0001366 | 0,058 |

|               |                |       |       |            |           |           |       |
|---------------|----------------|-------|-------|------------|-----------|-----------|-------|
| A_23_P94840   | DYNLRB2        | 0,39  | -0,56 | 0,03572840 | 0,0017252 | 0,0001468 | 0,062 |
| A_21_P0003801 | XLOC_004180    | -0,4  | 0,54  | 0,02924907 | 0,0023373 | 0,0001544 | 0,064 |
| A_33_P3281716 |                | 0,45  | -0,5  | 0,01332229 | 0,0059136 | 0,0001586 | 0,064 |
| A_21_P0012645 | XLOC_I2_010989 | 0,57  | -0,37 | 0,00133844 | 0,0468890 | 0,0001618 | 0,064 |
| A_33_P3334436 |                | -0,46 | 0,49  | 0,01198536 | 0,0071643 | 0,0001723 | 0,067 |
| A_23_P352717  | TMEM31         | -0,58 | 0,34  | 0,00092472 | 0,0694899 | 0,0001910 | 0,073 |
| A_23_P400310  | REG4           | -0,54 | 0,39  | 0,00252289 | 0,0346106 | 0,0002031 | 0,073 |
| A_23_P349416  | ERBB3          | -0,52 | 0,4   | 0,00339926 | 0,0273780 | 0,0002055 | 0,073 |
| A_33_P3679901 |                | -0,27 | 0,62  | 0,15034204 | 0,0003007 | 0,0002101 | 0,073 |
| A_33_P3287897 |                | 0,47  | -0,46 | 0,00897281 | 0,0109314 | 0,0002129 | 0,073 |
| A_23_P351215  | SKIL           | -0,57 | 0,34  | 0,00110904 | 0,0675806 | 0,0002172 | 0,073 |
| A_24_P128233  | SCN5A          | -0,15 | 0,69  | 0,42255491 | 0,0000365 | 0,0002231 | 0,073 |
| A_21_P0013398 | XLOC_I2_013530 | 0,62  | -0,27 | 0,00032786 | 0,1496486 | 0,0002247 | 0,073 |
| A_33_P3239185 | SYT7           | 0,59  | -0,32 | 0,00075932 | 0,0896887 | 0,0002262 | 0,073 |
| A_33_P3344801 | SLC2A1         | -0,38 | 0,54  | 0,04176737 | 0,0023373 | 0,0002367 | 0,073 |
| A_33_P3261620 | GHSR           | -0,31 | 0,59  | 0,09635471 | 0,0007263 | 0,0002386 | 0,073 |
| A_21_P0014906 | ANKRD62        | 0,44  | -0,49 | 0,01685641 | 0,0069893 | 0,0002435 | 0,073 |
| A_33_P3343750 | ZNF567         | -0,68 | 0,17  | 0,00005360 | 0,3807111 | 0,0002439 | 0,073 |
| A_21_P0001028 | XLOC_000461    | 0,42  | -0,5  | 0,02099782 | 0,0055250 | 0,0002451 | 0,073 |
| A_21_P0014062 | LOC100506206   | 0,52  | -0,39 | 0,00343042 | 0,0316319 | 0,0002453 | 0,073 |
| A_24_P91405   | ZNF709         | 0,55  | -0,36 | 0,00177762 | 0,0547041 | 0,0002555 | 0,073 |
| A_24_P170067  |                | 0,41  | -0,51 | 0,02425890 | 0,0043981 | 0,0002555 | 0,073 |
| A_33_P3399618 | KLHL33         | -0,42 | 0,5   | 0,01994595 | 0,0058638 | 0,0002568 | 0,073 |
| A_21_P0002588 | XLOC_001432    | -0,38 | 0,53  | 0,03975110 | 0,0027989 | 0,0002645 | 0,073 |
| A_24_P45446   | GBP4           | -0,4  | 0,52  | 0,03002637 | 0,0039994 | 0,0002678 | 0,073 |
| A_21_P0013985 | LOC100507494   | -0,4  | 0,51  | 0,02944183 | 0,0041815 | 0,0002734 | 0,073 |
| A_23_P405295  | LCE3C          | -0,6  | 0,29  | 0,00065657 | 0,1150103 | 0,0002791 | 0,073 |
| A_33_P3388745 | LOC100132207   | -0,61 | 0,27  | 0,00041764 | 0,1510378 | 0,0002799 | 0,073 |
| A_21_P0001607 | XLOC_001134    | 0,25  | -0,63 | 0,18563911 | 0,0002897 | 0,0002810 | 0,073 |

|                |                |       |       |            |           |           |       |
|----------------|----------------|-------|-------|------------|-----------|-----------|-------|
| A_33_P3343800  | TSSC1          | 0,45  | -0,46 | 0,01273468 | 0,0108473 | 0,0002830 | 0,073 |
| A_23_P63371    | TAL1           | 0,47  | -0,44 | 0,00927566 | 0,0148921 | 0,0002843 | 0,073 |
| A_21_P0008376  | XLOC_010903    | -0,59 | 0,3   | 0,00065150 | 0,1019488 | 0,0002854 | 0,073 |
| A_33_P3393504  | S100A7A        | 0,49  | -0,42 | 0,00627273 | 0,0206769 | 0,0002855 | 0,073 |
| A_21_P0001387  | XLOC_000471    | 0,43  | -0,49 | 0,01999546 | 0,0068180 | 0,0002864 | 0,073 |
| A_21_P0000856  | LOC100288432   | 0,47  | -0,44 | 0,00964917 | 0,0142221 | 0,0002981 | 0,075 |
| A_33_P3218910  |                | 0,5   | -0,41 | 0,00531808 | 0,0250942 | 0,0003170 | 0,078 |
| A_21_P0001131  | XLOC_000836    | -0,3  | 0,58  | 0,10617041 | 0,0008664 | 0,0003183 | 0,078 |
| A_33_P3362034  | FLJ46300       | -0,43 | 0,48  | 0,01903330 | 0,0081619 | 0,0003252 | 0,078 |
| A_23_P356330   | PPPDE2         | 0,57  | -0,32 | 0,00133844 | 0,0814140 | 0,0003280 | 0,078 |
| A_21_P0013845  | XLOC_I2_015535 | 0,54  | -0,36 | 0,00252289 | 0,0515837 | 0,0003287 | 0,078 |
| A_23_P44674    | CRIP1          | -0,41 | 0,5   | 0,02665775 | 0,0057652 | 0,0003340 | 0,078 |
| A_33_P3239744  |                | -0,51 | 0,39  | 0,00477128 | 0,0318374 | 0,0003398 | 0,078 |
| A_33_P3289123  | DCLK3          | 0,35  | -0,55 | 0,06035291 | 0,0021220 | 0,0003400 | 0,078 |
| A_33_P3328814  | SETBP1         | -0,47 | 0,44  | 0,00972539 | 0,0168564 | 0,0003407 | 0,078 |
| A_23_P67042    | MOCOS          | -0,43 | 0,47  | 0,01903330 | 0,0088438 | 0,0003526 | 0,079 |
| A_21_P0002448  | XLOC_002116    | 0,4   | -0,5  | 0,02924907 | 0,0054780 | 0,0003528 | 0,079 |
| A_21_P0014328  | LOC100505722   | -0,47 | 0,43  | 0,00805398 | 0,0197165 | 0,0003602 | 0,079 |
| A_23_P151297   | TENC1          | -0,53 | 0,36  | 0,00274689 | 0,0525045 | 0,0003634 | 0,079 |
| A_21_P0011809  | ANKRD36BP2     | 0,53  | -0,37 | 0,00321734 | 0,0471720 | 0,0003701 | 0,080 |
| A_24_P47467    | TMEM109        | 0,27  | -0,6  | 0,15025578 | 0,0006275 | 0,0003916 | 0,083 |
| A_23_P160940   | ABCA4          | 0,46  | -0,43 | 0,01068058 | 0,0178533 | 0,0003986 | 0,083 |
| A_33_P3270793  | FAM84A         | -0,52 | 0,37  | 0,00346714 | 0,0430690 | 0,0003987 | 0,083 |
| A_19_P00320144 | XLOC_003428    | -0,3  | 0,58  | 0,11331190 | 0,0010186 | 0,0004007 | 0,083 |
| A_21_P0011309  | XLOC_I2_004605 | -0,5  | 0,39  | 0,00507016 | 0,0350542 | 0,0004023 | 0,083 |
| A_21_P0012885  | XLOC_I2_011911 | -0,43 | 0,46  | 0,01836996 | 0,0106806 | 0,0004109 | 0,084 |
| A_33_P3385686  |                | -0,56 | 0,32  | 0,00170807 | 0,0867899 | 0,0004430 | 0,089 |
| A_33_P3338934  |                | 0,37  | -0,51 | 0,04632716 | 0,0041078 | 0,0004554 | 0,089 |
| A_21_P0007332  | XLOC_009403    | 0,55  | -0,32 | 0,00192414 | 0,0818519 | 0,0004569 | 0,089 |

|                |                |       |       |            |           |           |       |
|----------------|----------------|-------|-------|------------|-----------|-----------|-------|
| A_23_P110606   | MAML1          | -0,42 | 0,47  | 0,02097541 | 0,0092727 | 0,0004595 | 0,089 |
| A_19_P00804120 |                | -0,49 | 0,39  | 0,00637869 | 0,0326706 | 0,0004633 | 0,089 |
| A_21_P0008797  | XLOC_011603    | 0,37  | -0,51 | 0,04413383 | 0,0039917 | 0,0004651 | 0,089 |
| A_21_P0002952  | XLOC_002628    | 0,6   | -0,26 | 0,00064190 | 0,1669459 | 0,0004667 | 0,089 |
| A_19_P00320619 | ZNF876P        | 0,39  | -0,49 | 0,03163189 | 0,0068180 | 0,0004765 | 0,090 |
| A_33_P3301297  |                | 0,6   | -0,26 | 0,00064190 | 0,1714866 | 0,0004854 | 0,091 |
| A_33_P3345936  | CCDC9          | 0,52  | -0,35 | 0,00346184 | 0,0563198 | 0,0004900 | 0,091 |
| A_23_P112241   | DNAJB5         | -0,23 | 0,62  | 0,23017975 | 0,0003887 | 0,0005014 | 0,092 |
| A_21_P0009669  | XLOC_013256    | 0,33  | -0,54 | 0,07882501 | 0,0019465 | 0,0005046 | 0,092 |
| A_21_P0000505  | CXADRP3        | -0,34 | 0,53  | 0,06424809 | 0,0030439 | 0,0005108 | 0,092 |
| A_23_P150457   | LYVE1          | 0,5   | -0,37 | 0,00511415 | 0,0430690 | 0,0005141 | 0,092 |
| A_21_P0008650  | XLOC_011296    | -0,47 | 0,41  | 0,00905752 | 0,0255402 | 0,0005146 | 0,092 |
| A_21_P0009952  | XLOC_013495    | 0,47  | -0,41 | 0,00898578 | 0,0268363 | 0,0005204 | 0,092 |
| A_21_P0009014  | XLOC_011883    | -0,5  | 0,38  | 0,00591365 | 0,0387730 | 0,0005230 | 0,092 |
| A_21_P0004865  | XLOC_005215    | 0,47  | -0,41 | 0,00843250 | 0,0260741 | 0,0005276 | 0,092 |
| A_33_P3339100  | SELP           | 0,64  | -0,18 | 0,00019005 | 0,3361331 | 0,0005299 | 0,092 |
| A_21_P0011214  | XLOC_I2_003897 | 0,64  | -0,17 | 0,00017103 | 0,3644803 | 0,0005634 | 0,093 |
| A_23_P38649    | MC2R           | -0,31 | 0,55  | 0,10014820 | 0,0018133 | 0,0005642 | 0,093 |
| A_21_P0013715  | XLOC_I2_015101 | 0,27  | -0,58 | 0,14826872 | 0,0009865 | 0,0005659 | 0,093 |
| A_24_P76666    | CSNK2A1        | 0,4   | -0,48 | 0,03007152 | 0,0083616 | 0,0005662 | 0,093 |
| A_23_P65618    | TGM1           | -0,62 | 0,2   | 0,00031210 | 0,2772288 | 0,0005664 | 0,093 |
| A_33_P3280927  | SNHG7          | 0,53  | -0,33 | 0,00290562 | 0,0724604 | 0,0005726 | 0,093 |
| A_23_P90369    | C19orf6        | 0,46  | -0,42 | 0,01189437 | 0,0226572 | 0,0005728 | 0,093 |
| A_33_P3402565  | DSP            | 0,41  | -0,46 | 0,02341111 | 0,0111014 | 0,0005748 | 0,093 |
| A_23_P55270    | CCL18          | 0,52  | -0,35 | 0,00382415 | 0,0603529 | 0,0005835 | 0,093 |
| A_23_P402331   | WFDC5          | 0,56  | -0,29 | 0,00140909 | 0,1219960 | 0,0005869 | 0,093 |
| A_33_P3390284  | FAM122B        | 0,64  | -0,17 | 0,00017103 | 0,3733840 | 0,0005885 | 0,093 |
| A_33_P3317558  | WHAMMP3        | 0,39  | -0,48 | 0,03309383 | 0,0083616 | 0,0006107 | 0,096 |
| ERCC-00067_104 |                | 0,43  | -0,44 | 0,01666539 | 0,0158150 | 0,0006113 | 0,096 |



|                |             |       |       |            |           |           |       |
|----------------|-------------|-------|-------|------------|-----------|-----------|-------|
| A_33_P3407700  | TMEM192     | 0,43  | -0,44 | 0,01772606 | 0,0164948 | 0,0006168 | 0,096 |
| A_21_P0011397  | WHAMMP2     | 0,59  | -0,25 | 0,00083845 | 0,1753377 | 0,0006271 | 0,097 |
| A_23_P117380   | FAM181A     | -0,31 | 0,55  | 0,09836104 | 0,0021427 | 0,0006365 | 0,097 |
| A_33_P3299754  | RAB18       | 0,52  | -0,34 | 0,00399936 | 0,0628093 | 0,0006378 | 0,097 |
| A_23_P144490   | DCHS2       | -0,4  | 0,46  | 0,02811423 | 0,0105981 | 0,0006440 | 0,097 |
| A_33_P3254412  | ULK2        | 0,48  | -0,38 | 0,00740335 | 0,0390157 | 0,0006527 | 0,098 |
| A_23_P50535    | DMPK        | -0,47 | 0,39  | 0,00934937 | 0,0324607 | 0,0006663 | 0,098 |
| A_24_P304154   | AMPD3       | 0,55  | -0,29 | 0,00149131 | 0,1161531 | 0,0006682 | 0,098 |
| A_19_P00315668 | HIPK2       | 0,32  | -0,54 | 0,08910926 | 0,0026204 | 0,0006702 | 0,098 |
| A_24_P378019   | IRF7        | -0,47 | 0,4   | 0,00930189 | 0,0310218 | 0,0006755 | 0,098 |
| A_33_P3264394  | ASPSCR1     | -0,43 | 0,43  | 0,01772606 | 0,0186329 | 0,0006992 | 0,101 |
| A_33_P3226557  | PRR23B      | -0,41 | 0,45  | 0,02393128 | 0,0138293 | 0,0007060 | 0,101 |
| A_23_P147822   | EPS8L2      | 0,27  | -0,57 | 0,14621641 | 0,0013111 | 0,0007066 | 0,101 |
| A_23_P47967    | LHX5        | 0,31  | -0,54 | 0,09291928 | 0,0026704 | 0,0007186 | 0,101 |
| A_33_P3280916  | SNHG4       | 0,47  | -0,39 | 0,00949826 | 0,0343905 | 0,0007208 | 0,101 |
| A_19_P00328886 | TUG1        | 0,39  | -0,47 | 0,03330712 | 0,0098793 | 0,0007230 | 0,101 |
| A_24_P411573   | NPY6R       | -0,5  | 0,35  | 0,00511415 | 0,0579734 | 0,0007269 | 0,101 |
| A_23_P67151    | OLFM2       | -0,43 | 0,43  | 0,01999546 | 0,0175996 | 0,0007465 | 0,103 |
| A_32_P121303   | NUP50       | 0,68  | -0,08 | 0,00004750 | 0,6789779 | 0,0007607 | 0,104 |
| A_24_P944640   | EPB41L5     | -0,4  | 0,45  | 0,02867703 | 0,0124492 | 0,0007709 | 0,104 |
| A_23_P256965   | C8orf12     | -0,46 | 0,39  | 0,01084727 | 0,0328817 | 0,0007807 | 0,104 |
| A_24_P345498   | XRCC5       | 0,34  | -0,51 | 0,06645495 | 0,0046479 | 0,0007827 | 0,104 |
| A_24_P62860    | STAM2       | 0,31  | -0,53 | 0,09656438 | 0,0024194 | 0,0007849 | 0,104 |
| A_21_P0001474  | XLOC_000730 | 0,42  | -0,43 | 0,02158914 | 0,0163574 | 0,0007872 | 0,104 |
| A_21_P0004921  | XLOC_005429 | -0,09 | 0,68  | 0,65327242 | 0,0000569 | 0,0007945 | 0,104 |
| A_21_P0005411  | XLOC_006192 | 0,36  | -0,49 | 0,05067588 | 0,0060982 | 0,0007958 | 0,104 |
| A_21_P0003962  | XLOC_004278 | 0,45  | -0,4  | 0,01362456 | 0,0273780 | 0,0008021 | 0,104 |
| A_33_P3360863  | LOC644794   | -0,4  | 0,45  | 0,02924907 | 0,0127347 | 0,0008051 | 0,104 |
| A_33_P3303594  | PRAMEF11    | 0,5   | -0,35 | 0,00566808 | 0,0586455 | 0,0008100 | 0,104 |

|                |               |       |       |            |           |           |       |
|----------------|---------------|-------|-------|------------|-----------|-----------|-------|
| A_33_P3262973  |               | -0,42 | 0,43  | 0,02120160 | 0,0174738 | 0,0008191 | 0,104 |
| A_24_P284805   | INPP5J        | -0,36 | 0,49  | 0,05375255 | 0,0064322 | 0,0008231 | 0,104 |
| A_33_P3388453  | NANOS2        | -0,4  | 0,45  | 0,02737800 | 0,0141412 | 0,0008322 | 0,104 |
| A_21_P0001191  | XLOC_001084   | -0,44 | 0,41  | 0,01613972 | 0,0242589 | 0,0008360 | 0,104 |
| A_23_P75741    | UBE2L6        | -0,42 | 0,43  | 0,02056323 | 0,0183453 | 0,0008376 | 0,104 |
| A_33_P3210810  | LINC00260     | -0,54 | 0,29  | 0,00218467 | 0,1202205 | 0,0008404 | 0,104 |
| A_21_P0001447  | XLOC_000642   | 0,48  | -0,37 | 0,00777475 | 0,0464010 | 0,0008462 | 0,104 |
| A_23_P75764    | OR5A1         | -0,48 | 0,37  | 0,00809628 | 0,0457708 | 0,0008502 | 0,104 |
| A_33_P3733115  |               | 0,48  | -0,36 | 0,00746418 | 0,0484353 | 0,0008540 | 0,104 |
| A_23_P44569    | ABCC2         | -0,51 | 0,33  | 0,00437066 | 0,0750623 | 0,0008568 | 0,104 |
| A_33_P3266609  |               | 0,47  | -0,38 | 0,00995710 | 0,0387730 | 0,0008607 | 0,104 |
| A_23_P212469   | ENTPD3        | 0,56  | -0,27 | 0,00157605 | 0,1518715 | 0,0008675 | 0,104 |
| A_33_P3331752  |               | -0,34 | 0,5   | 0,06872116 | 0,0047526 | 0,0009124 | 0,108 |
| A_33_P3369178  | PRG4          | 0,37  | -0,47 | 0,04386566 | 0,0092025 | 0,0009152 | 0,108 |
| A_19_P00321801 | EYS           | 0,51  | -0,33 | 0,00477128 | 0,0746530 | 0,0009212 | 0,108 |
| A_23_P133365   | TCERG1        | -0,37 | 0,47  | 0,04413383 | 0,0092025 | 0,0009214 | 0,108 |
| A_33_P3341906  | C10orf128     | -0,46 | 0,38  | 0,01110142 | 0,0367499 | 0,0009227 | 0,108 |
| A_23_P208373   | CYP2B6        | 0,38  | -0,46 | 0,03710843 | 0,0113606 | 0,0009312 | 0,108 |
| A_32_P407245   | DNAJC22       | -0,51 | 0,32  | 0,00425628 | 0,0822916 | 0,0009353 | 0,108 |
| A_23_P216434   | ECM2          | 0,36  | -0,48 | 0,05250445 | 0,0077118 | 0,0009487 | 0,109 |
| A_33_P3213082  |               | -0,58 | 0,22  | 0,00086639 | 0,2311202 | 0,0009688 | 0,111 |
| A_33_P3319987  | SCML4         | 0,33  | -0,5  | 0,07343569 | 0,0052031 | 0,0009768 | 0,111 |
| A_33_P3236881  | C1orf151-NBL1 | -0,24 | 0,57  | 0,19889768 | 0,0011568 | 0,0009831 | 0,111 |
| A_24_P922631   | C5orf58       | -0,47 | 0,37  | 0,00920246 | 0,0477420 | 0,0010058 | 0,113 |
| A_19_P00315804 | FLJ35024      | 0,52  | -0,3  | 0,00333766 | 0,1045720 | 0,0010151 | 0,114 |
| A_21_P0009990  | XLOC_013608   | -0,32 | 0,51  | 0,09005027 | 0,0041815 | 0,0010278 | 0,114 |
| A_23_P69383    | PARP9         | -0,31 | 0,52  | 0,10039918 | 0,0035900 | 0,0010280 | 0,114 |
| A_32_P102519   | LOC541473     | -0,64 | 0,14  | 0,00021924 | 0,4578815 | 0,0010303 | 0,114 |
| A_33_P3377090  |               | 0,59  | -0,22 | 0,00080243 | 0,2514754 | 0,0010352 | 0,114 |

|                |                |       |       |            |           |           |       |
|----------------|----------------|-------|-------|------------|-----------|-----------|-------|
| A_23_P257111   | FBP1           | 0,45  | -0,39 | 0,01285382 | 0,0357284 | 0,0010638 | 0,114 |
| A_21_P0009699  | XLOC_013026    | 0,43  | -0,4  | 0,01734887 | 0,0286770 | 0,0010701 | 0,114 |
| A_33_P3211014  |                | -0,15 | 0,63  | 0,43364489 | 0,0002621 | 0,0010733 | 0,114 |
| A_33_P3372004  | IGSF6          | 0,35  | -0,48 | 0,05898386 | 0,0070335 | 0,0010743 | 0,114 |
| A_23_P92727    | RAI14          | -0,25 | 0,56  | 0,17846278 | 0,0015602 | 0,0010790 | 0,114 |
| A_33_P3278220  | RABEPK         | 0,41  | -0,42 | 0,02442944 | 0,0201362 | 0,0010887 | 0,114 |
| A_21_P0007750  | XLOC_010176    | -0,29 | 0,53  | 0,11672774 | 0,0031008 | 0,0010948 | 0,114 |
| A_21_P0005194  | XLOC_006159    | 0,56  | -0,25 | 0,00162448 | 0,1761152 | 0,0010954 | 0,114 |
| A_23_P154688   | SLC4A11        | -0,33 | 0,5   | 0,07882501 | 0,0053850 | 0,0010963 | 0,114 |
| A_33_P3368950  | C5orf65        | -0,43 | 0,41  | 0,01971651 | 0,0261279 | 0,0011037 | 0,114 |
| A_33_P3396972  | LOC100129113   | -0,34 | 0,49  | 0,06608305 | 0,0062599 | 0,0011061 | 0,114 |
| A_21_P0011238  | XLOC_I2_004157 | 0,41  | -0,43 | 0,02510219 | 0,0190971 | 0,0011061 | 0,114 |
| A_21_P0004669  | XLOC_005393    | 0,64  | -0,13 | 0,00021365 | 0,4795834 | 0,0011107 | 0,114 |
| ERCC-00113_271 |                | 0,42  | -0,42 | 0,02234769 | 0,0225216 | 0,0011159 | 0,114 |
| A_33_P3298251  |                | -0,55 | 0,27  | 0,00206085 | 0,1545521 | 0,0011173 | 0,114 |
| A_21_P0010073  | KCNQ2          | -0,43 | 0,4   | 0,01823964 | 0,0286770 | 0,0011246 | 0,114 |
| A_33_P3258772  | LOC100506816   | -0,41 | 0,42  | 0,02475729 | 0,0215891 | 0,0011439 | 0,115 |
| A_21_P0010149  | XLOC_013885    | 0,23  | -0,58 | 0,23017975 | 0,0010744 | 0,0011465 | 0,115 |
| A_33_P3323975  |                | 0,31  | -0,51 | 0,09988665 | 0,0041078 | 0,0011498 | 0,115 |
| A_33_P3389230  | CXCR3          | -0,41 | 0,43  | 0,02683633 | 0,0199955 | 0,0011506 | 0,115 |
| A_33_P3353630  |                | -0,62 | 0,15  | 0,00031210 | 0,4211800 | 0,0011624 | 0,115 |
| A_33_P3357954  | ETV1           | -0,52 | 0,3   | 0,00392846 | 0,1051028 | 0,0011779 | 0,116 |
| A_33_P3368388  | DNAAF1         | 0,28  | -0,53 | 0,13626653 | 0,0026957 | 0,0011863 | 0,116 |
| A_33_P3390086  |                | 0,42  | -0,41 | 0,02265724 | 0,0245902 | 0,0011928 | 0,116 |
| A_21_P0013662  | HSPB1          | -0,44 | 0,39  | 0,01500207 | 0,0364131 | 0,0011939 | 0,116 |
| A_23_P392076   | STRN3          | 0,23  | -0,57 | 0,21280620 | 0,0010948 | 0,0012101 | 0,117 |
| A_21_P0003746  | LOC401134      | -0,46 | 0,36  | 0,00969886 | 0,0509770 | 0,0012123 | 0,117 |
| A_33_P3365072  | LCE6A          | -0,43 | 0,4   | 0,01836996 | 0,0308205 | 0,0012210 | 0,117 |
| A_33_P3223106  | ZNF890P        | -0,48 | 0,34  | 0,00752543 | 0,0668285 | 0,0012228 | 0,117 |

|                |                |       |       |            |           |           |       |
|----------------|----------------|-------|-------|------------|-----------|-----------|-------|
| A_23_P429082   | SPTY2D1        | 0,55  | -0,26 | 0,00200126 | 0,1692053 | 0,0012332 | 0,117 |
| A_21_P0007579  | XLOC_009800    | 0,23  | -0,57 | 0,21548720 | 0,0013247 | 0,0012338 | 0,117 |
| A_24_P399230   | WFIKKN2        | -0,28 | 0,53  | 0,13886943 | 0,0027989 | 0,0012556 | 0,118 |
| A_33_P3329104  |                | -0,37 | 0,45  | 0,04333328 | 0,0126058 | 0,0012864 | 0,120 |
| A_33_P3413905  | ADM2           | -0,26 | 0,54  | 0,16545174 | 0,0022059 | 0,0012974 | 0,120 |
| A_23_P119448   | PPP6R1         | 0,47  | -0,35 | 0,00905752 | 0,0606991 | 0,0012985 | 0,120 |
| A_21_P0000316  | SNORA20        | 0,35  | -0,47 | 0,05966527 | 0,0092757 | 0,0013018 | 0,120 |
| A_24_P110780   | NEXN-AS1       | 0,33  | -0,49 | 0,07635678 | 0,0067617 | 0,0013052 | 0,120 |
| A_23_P108082   | CREB3L3        | 0,28  | -0,53 | 0,13179860 | 0,0032471 | 0,0013315 | 0,121 |
| A_19_P00811048 | ZEB1-AS1       | 0,5   | -0,32 | 0,00581435 | 0,0877120 | 0,0013342 | 0,121 |
| A_21_P0002642  | XLOC_001958    | 0,44  | -0,38 | 0,01649480 | 0,0371084 | 0,0013356 | 0,121 |
| A_21_P0009632  | XLOC_012857    | -0,29 | 0,51  | 0,11387591 | 0,0040714 | 0,0013434 | 0,121 |
| A_23_P389250   | C12orf70       | -0,58 | 0,2   | 0,00086639 | 0,2869073 | 0,0013495 | 0,121 |
| A_23_P110345   | CHIC2          | 0,65  | -0,09 | 0,00009160 | 0,6308065 | 0,0013514 | 0,121 |
| A_23_P207537   | DUSP14         | -0,5  | 0,32  | 0,00591365 | 0,0881759 | 0,0013630 | 0,121 |
| A_24_P364236   | NDUFC2         | 0,47  | -0,34 | 0,00927566 | 0,0619902 | 0,0013745 | 0,121 |
| A_23_P44207    | ACOT12         | -0,5  | 0,31  | 0,00507016 | 0,0998867 | 0,0013833 | 0,121 |
| A_24_P222872   | UGT1A6         | 0,14  | -0,62 | 0,46508663 | 0,0003121 | 0,0013844 | 0,121 |
| A_21_P0009474  | XLOC_012666    | 0,53  | -0,28 | 0,00321734 | 0,1369997 | 0,0013867 | 0,121 |
| A_23_P156788   | STX11          | -0,36 | 0,46  | 0,05037614 | 0,0114354 | 0,0013876 | 0,121 |
| A_33_P3321225  |                | -0,44 | 0,38  | 0,01637572 | 0,0387730 | 0,0013894 | 0,121 |
| A_23_P476      | MPZL1          | -0,45 | 0,36  | 0,01254374 | 0,0497809 | 0,0014104 | 0,122 |
| A_33_P3359743  |                | 0,48  | -0,33 | 0,00740335 | 0,0767169 | 0,0014140 | 0,122 |
| A_21_P0004495  | XLOC_004325    | 0,4   | -0,42 | 0,02830081 | 0,0225051 | 0,0014180 | 0,122 |
| A_23_P171385   | PHF6           | 0,44  | -0,38 | 0,01522992 | 0,0404977 | 0,0014239 | 0,122 |
| A_33_P3287238  |                | 0,35  | -0,46 | 0,05566903 | 0,0111873 | 0,0014332 | 0,123 |
| A_33_P3409090  | CNTN1          | 0,32  | -0,49 | 0,08826501 | 0,0063255 | 0,0014556 | 0,124 |
| A_21_P0013215  | XLOC_I2_013443 | 0,47  | -0,34 | 0,00964917 | 0,0642481 | 0,0014679 | 0,125 |
| A_33_P3306327  |                | 0,29  | -0,51 | 0,12022049 | 0,0041815 | 0,0014716 | 0,125 |

|                |                |       |       |            |           |           |       |
|----------------|----------------|-------|-------|------------|-----------|-----------|-------|
| A_33_P3365267  |                | -0,26 | 0,53  | 0,16102724 | 0,0026957 | 0,0014796 | 0,125 |
| A_33_P3411991  | RABGAP1        | 0,45  | -0,36 | 0,01322279 | 0,0490703 | 0,0014827 | 0,125 |
| A_24_P388252   | PPP3R1         | 0,45  | -0,36 | 0,01322279 | 0,0500778 | 0,0014919 | 0,125 |
| A_23_P74290    | GBP5           | -0,42 | 0,39  | 0,02173911 | 0,0322518 | 0,0015114 | 0,125 |
| A_23_P20697    | ADAMTSL2       | -0,36 | 0,45  | 0,04919138 | 0,0137266 | 0,0015157 | 0,125 |
| A_21_P0010416  | XLOC_014237    | -0,14 | 0,62  | 0,45630213 | 0,0003659 | 0,0015160 | 0,125 |
| A_19_P00804950 | P39188         | 0,51  | -0,3  | 0,00435792 | 0,1121902 | 0,0015349 | 0,126 |
| A_21_P0005046  | XLOC_005792    | 0,44  | -0,37 | 0,01533605 | 0,0454946 | 0,0015475 | 0,127 |
| A_23_P43119    | PSKH2          | -0,05 | -0,72 | 0,79421949 | 0,0000069 | 0,0015636 | 0,127 |
| A_21_P0011310  | HERC2          | 0,36  | -0,45 | 0,05067588 | 0,0137266 | 0,0015656 | 0,127 |
| A_19_P00321317 | Q39472         | 0,33  | -0,47 | 0,07263282 | 0,0089145 | 0,0015703 | 0,127 |
| A_21_P0001125  | XLOC_000816    | -0,35 | 0,46  | 0,06069908 | 0,0112737 | 0,0015894 | 0,128 |
| A_23_P168812   | FAM200A        | 0,59  | -0,18 | 0,00071825 | 0,3519838 | 0,0016170 | 0,130 |
| A_33_P3314121  |                | 0,24  | -0,55 | 0,19916357 | 0,0018393 | 0,0016305 | 0,131 |
| A_33_P3263217  | LRRC4          | 0,35  | -0,45 | 0,05496530 | 0,0130257 | 0,0016509 | 0,132 |
| A_33_P3302393  | KLHL36         | 0,45  | -0,36 | 0,01445901 | 0,0518892 | 0,0016870 | 0,134 |
| A_21_P0001142  | XLOC_000872    | -0,32 | 0,48  | 0,08771201 | 0,0075871 | 0,0016910 | 0,134 |
| A_33_P3373437  | LOC100129463   | -0,34 | 0,46  | 0,06720371 | 0,0107637 | 0,0017072 | 0,135 |
| A_21_P0001119  | XLOC_000772    | -0,38 | 0,42  | 0,03734260 | 0,0212918 | 0,0017235 | 0,136 |
| A_32_P88880    |                | 0,5   | -0,29 | 0,00533902 | 0,1155806 | 0,0017309 | 0,136 |
| A_23_P142255   | SHD            | -0,26 | 0,53  | 0,16920528 | 0,0030158 | 0,0017361 | 0,136 |
| A_33_P3317431  |                | 0,43  | -0,38 | 0,01944081 | 0,0408078 | 0,0017660 | 0,137 |
| A_24_P194154   | UPF1           | 0,48  | -0,32 | 0,00849701 | 0,0831557 | 0,0017677 | 0,137 |
| A_21_P0007420  | XLOC_009603    | -0,44 | 0,36  | 0,01500207 | 0,0528143 | 0,0017803 | 0,137 |
| A_33_P3342938  | MEIS1          | 0,38  | -0,42 | 0,03781455 | 0,0217391 | 0,0017819 | 0,137 |
| A_24_P211842   | FADS6          | 0,43  | -0,37 | 0,01889905 | 0,0430690 | 0,0017829 | 0,137 |
| A_21_P0011566  | XLOC_I2_005952 | 0,47  | -0,33 | 0,01011417 | 0,0738397 | 0,0017945 | 0,137 |
| A_24_P495367   | GRXCR1         | -0,42 | 0,38  | 0,02204165 | 0,0370156 | 0,0018063 | 0,137 |
| A_19_P00803850 | LOC100505474   | -0,4  | 0,4   | 0,02830081 | 0,0298305 | 0,0018145 | 0,137 |

|                |                |       |       |            |           |           |       |
|----------------|----------------|-------|-------|------------|-----------|-----------|-------|
| A_23_P502343   | ADAM33         | -0,18 | 0,58  | 0,33613308 | 0,0009247 | 0,0018244 | 0,137 |
| A_33_P3399480  |                | 0,63  | -0,11 | 0,00025878 | 0,5753595 | 0,0018266 | 0,137 |
| A_21_P0009161  | XLOC_012120    | -0,12 | 0,62  | 0,52949878 | 0,0003239 | 0,0018290 | 0,137 |
| A_23_P334864   | FAM126B        | -0,37 | 0,43  | 0,04540968 | 0,0179813 | 0,0018294 | 0,137 |
| A_33_P3307486  | SYNRG          | 0,46  | -0,34 | 0,01198536 | 0,0657128 | 0,0018374 | 0,137 |
| A_24_P281801   | ZNF732         | 0,57  | -0,2  | 0,00127090 | 0,2897967 | 0,0018418 | 0,137 |
| A_21_P0007320  | XLOC_009378    | 0,08  | -0,64 | 0,66693516 | 0,0001733 | 0,0018603 | 0,138 |
| A_19_P00804740 | FLJ39653       | -0,33 | 0,46  | 0,07343569 | 0,0107637 | 0,0018870 | 0,139 |
| A_24_P175909   | MARS           | 0,3   | -0,49 | 0,10566989 | 0,0060982 | 0,0018871 | 0,139 |
| A_33_P3389599  |                | -0,46 | 0,34  | 0,01162490 | 0,0691047 | 0,0018902 | 0,139 |
| A_23_P16058    | ZNF296         | -0,66 | 0,04  | 0,00009220 | 0,8178864 | 0,0019114 | 0,139 |
| A_19_P00803342 | ZNF678         | -0,15 | 0,6   | 0,41728215 | 0,0006204 | 0,0019128 | 0,139 |
| A_19_P00321617 |                | 0,48  | -0,31 | 0,00740335 | 0,0993761 | 0,0019179 | 0,139 |
| A_33_P3235282  | LOC401561      | -0,23 | 0,55  | 0,22644419 | 0,0018015 | 0,0019322 | 0,140 |
| A_21_P0001288  | XLOC_000160    | 0,42  | -0,37 | 0,02023573 | 0,0422842 | 0,0019406 | 0,140 |
| A_24_P158314   | GARNL3         | -0,4  | 0,39  | 0,02724328 | 0,0324607 | 0,0019604 | 0,141 |
| A_19_P00327081 | XLOC_I2_001273 | 0,35  | -0,44 | 0,05830865 | 0,0148921 | 0,0019689 | 0,141 |
| A_19_P00809423 | P39188         | -0,17 | 0,58  | 0,36195994 | 0,0007068 | 0,0019782 | 0,141 |
| A_21_P0007905  | FLJ31485       | -0,41 | 0,38  | 0,02475729 | 0,0371084 | 0,0019843 | 0,141 |
| A_23_P8640     | GPER           | 0,61  | -0,14 | 0,00051025 | 0,4620646 | 0,0019895 | 0,141 |
| A_21_P0010260  | XLOC_013965    | -0,31 | 0,47  | 0,09052364 | 0,0087735 | 0,0019969 | 0,141 |
| A_24_P284324   | TMEM104        | -0,43 | 0,36  | 0,01759958 | 0,0512796 | 0,0020049 | 0,141 |
| A_33_P3285195  | LOC100507012   | 0,48  | -0,31 | 0,00790203 | 0,0983610 | 0,0020067 | 0,141 |
| A_24_P922357   | C22orf39       | 0,32  | -0,47 | 0,08771201 | 0,0092757 | 0,0020228 | 0,141 |
| A_21_P0007756  | XLOC_010191    | 0,04  | -0,66 | 0,81605993 | 0,0000684 | 0,0020231 | 0,141 |
| A_33_P3403142  |                | 0,44  | -0,35 | 0,01649480 | 0,0550242 | 0,0020344 | 0,141 |
| A_23_P152002   | BCL2A1         | 0,48  | -0,3  | 0,00728297 | 0,1061704 | 0,0020457 | 0,142 |
| A_33_P3273255  |                | -0,44 | 0,36  | 0,01685641 | 0,0543854 | 0,0020503 | 0,142 |
| A_24_P322635   | ELMO2          | 0,18  | -0,57 | 0,32660161 | 0,0011568 | 0,0020736 | 0,142 |

|                |                |       |       |            |           |           |       |
|----------------|----------------|-------|-------|------------|-----------|-----------|-------|
| A_21_P0004206  | XLOC_004257    | 0,38  | -0,41 | 0,03877300 | 0,0247573 | 0,0020758 | 0,142 |
| A_21_P0014227  | LOC100506331   | 0,4   | -0,39 | 0,03002637 | 0,0322518 | 0,0020823 | 0,142 |
| A_23_P216596   | SVEP1          | -0,29 | 0,5   | 0,12621515 | 0,0058638 | 0,0020919 | 0,142 |
| A_32_P19840    | LOC100507507   | 0,38  | -0,41 | 0,04125571 | 0,0234467 | 0,0020990 | 0,142 |
| A_23_P432626   | SLC25A40       | 0,44  | -0,35 | 0,01544876 | 0,0600083 | 0,0021021 | 0,142 |
| A_21_P0003762  | XLOC_004054    | 0,47  | -0,32 | 0,01019349 | 0,0845176 | 0,0021087 | 0,142 |
| A_23_P64828    | OAS1           | 0,55  | -0,21 | 0,00165736 | 0,2560609 | 0,0021510 | 0,144 |
| A_23_P145761   | ARL4A          | 0,5   | -0,28 | 0,00538500 | 0,1375634 | 0,0021648 | 0,144 |
| A_23_P360769   | MAN2A1         | 0,43  | -0,36 | 0,01863294 | 0,0525045 | 0,0021700 | 0,144 |
| A_33_P3405531  | TMF1           | 0,51  | -0,27 | 0,00448768 | 0,1559744 | 0,0021761 | 0,144 |
| A_21_P0006029  | XLOC_007460    | -0,3  | 0,48  | 0,10299202 | 0,0075931 | 0,0021938 | 0,144 |
| A_33_P3334688  | CPNE2          | -0,46 | 0,33  | 0,01139011 | 0,0767169 | 0,0022067 | 0,144 |
| A_33_P3256550  | MST152         | -0,36 | 0,42  | 0,04919138 | 0,0204200 | 0,0022088 | 0,144 |
| A_32_P186226   | IPO7           | 0,57  | -0,19 | 0,00128417 | 0,3230712 | 0,0022109 | 0,144 |
| A_23_P101131   | GRP            | -0,42 | 0,37  | 0,02144003 | 0,0474563 | 0,0022282 | 0,144 |
| A_33_P3294222  | RLTPR          | -0,49 | 0,29  | 0,00710553 | 0,1160699 | 0,0022298 | 0,144 |
| A_19_P00330814 | HOTAIR         | 0,43  | -0,36 | 0,01889905 | 0,0525580 | 0,0022327 | 0,144 |
| A_23_P411772   | PCDHGB2        | 0,45  | -0,33 | 0,01263890 | 0,0750623 | 0,0022380 | 0,144 |
| A_21_P0013847  | XLOC_I2_015561 | 0,49  | -0,28 | 0,00596384 | 0,1317986 | 0,0022392 | 0,144 |
| A_33_P3355694  |                | 0,48  | -0,3  | 0,00764981 | 0,1045720 | 0,0022476 | 0,144 |
| A_33_P3225843  | CCDC149        | 0,28  | -0,5  | 0,13952584 | 0,0055250 | 0,0022521 | 0,144 |
| A_33_P3250857  | AIDA           | -0,38 | 0,41  | 0,04024760 | 0,0259532 | 0,0022584 | 0,144 |
| A_21_P0002767  | XLOC_002797    | 0,24  | -0,52 | 0,19468504 | 0,0029027 | 0,0022591 | 0,144 |
| A_33_P3232677  |                | -0,27 | 0,51  | 0,15455212 | 0,0047713 | 0,0022644 | 0,144 |
| A_23_P144005   | C3orf32        | -0,36 | 0,42  | 0,04860745 | 0,0212918 | 0,0022699 | 0,144 |
| A_21_P0006334  | XLOC_007895    | -0,27 | 0,5   | 0,14621641 | 0,0052031 | 0,0022702 | 0,144 |
| A_33_P3337500  |                | -0,3  | 0,48  | 0,11052347 | 0,0077747 | 0,0022724 | 0,144 |
| A_33_P3266928  | LMTK3          | -0,55 | 0,21  | 0,00204081 | 0,2595359 | 0,0022891 | 0,145 |
| A_21_P0004272  | XLOC_004446    | -0,39 | 0,39  | 0,03183744 | 0,0339537 | 0,0023243 | 0,146 |

|                |                |       |       |            |           |           |       |
|----------------|----------------|-------|-------|------------|-----------|-----------|-------|
| A_21_P0009515  | XLOC_012746    | -0,44 | 0,34  | 0,01488760 | 0,0653442 | 0,0023366 | 0,146 |
| A_33_P3277228  | OVOS           | 0,4   | -0,39 | 0,03122406 | 0,0348318 | 0,0023390 | 0,146 |
| A_33_P3211384  | KIAA1683       | -0,24 | 0,52  | 0,19720502 | 0,0033993 | 0,0023532 | 0,147 |
| A_21_P0014513  | LOC100507115   | -0,57 | 0,18  | 0,00123183 | 0,3446125 | 0,0023692 | 0,147 |
| A_24_P246943   | PPIA           | 0,29  | -0,48 | 0,11387591 | 0,0078382 | 0,0023718 | 0,147 |
| A_23_P166929   | SERPINI1       | 0,33  | -0,45 | 0,07343569 | 0,0139326 | 0,0023865 | 0,147 |
| A_33_P3277890  |                | 0,2   | -0,55 | 0,28043097 | 0,0018680 | 0,0023909 | 0,147 |
| ERCC-00019_219 |                | -0,24 | 0,52  | 0,19636250 | 0,0030874 | 0,0023970 | 0,147 |
| A_21_P0014692  | LOC100288781   | -0,27 | 0,5   | 0,14150884 | 0,0058638 | 0,0024111 | 0,147 |
| A_21_P0011204  | METTL21CP1     | 0,4   | -0,38 | 0,03002637 | 0,0373426 | 0,0024138 | 0,147 |
| A_21_P0006472  | XLOC_008263    | -0,28 | 0,49  | 0,13306389 | 0,0064322 | 0,0024170 | 0,147 |
| A_24_P29733    | CDK14          | 0,49  | -0,29 | 0,00650928 | 0,1243938 | 0,0024219 | 0,147 |
| A_21_P0011228  | XLOC_I2_003974 | -0,4  | 0,38  | 0,02983047 | 0,0372265 | 0,0024429 | 0,148 |
| A_33_P3232995  | TDRD1          | -0,44 | 0,34  | 0,01625736 | 0,0664550 | 0,0024631 | 0,149 |
| A_33_P3299634  | OR1L6          | -0,11 | 0,61  | 0,56572487 | 0,0004127 | 0,0024806 | 0,149 |
| A_21_P0007839  | XLOC_009784    | 0,57  | -0,18 | 0,00133844 | 0,3409625 | 0,0024837 | 0,149 |
| A_33_P3381410  | ORC2           | 0,51  | -0,25 | 0,00407136 | 0,1856391 | 0,0025178 | 0,151 |
| A_23_P168092   |                | -0,48 | 0,28  | 0,00722341 | 0,1274404 | 0,0025320 | 0,151 |
| A_21_P0003908  | XLOC_004165    | 0,64  | -0,07 | 0,00020286 | 0,7296828 | 0,0025347 | 0,151 |
| A_33_P3284919  | SEMA6C         | -0,23 | 0,53  | 0,22366989 | 0,0026450 | 0,0025424 | 0,151 |
| A_33_P3379081  |                | 0,28  | -0,48 | 0,12744039 | 0,0072830 | 0,0025499 | 0,151 |
| A_23_P52727    | NAV2           | 0,29  | -0,48 | 0,11615312 | 0,0082946 | 0,0025510 | 0,151 |
| A_21_P0008908  | XLOC_011655    | 0,17  | -0,57 | 0,37082703 | 0,0011690 | 0,0025589 | 0,151 |
| A_24_P391586   | OAF            | -0,31 | 0,46  | 0,09243629 | 0,0106434 | 0,0025723 | 0,151 |
| A_33_P3318424  |                | -0,24 | 0,52  | 0,19301769 | 0,0039285 | 0,0025745 | 0,151 |
| A_21_P0010435  | XLOC_014347    | 0,31  | -0,47 | 0,10143027 | 0,0101935 | 0,0026035 | 0,152 |
| A_33_P3367577  | EIF4ENIF1      | 0,53  | -0,22 | 0,00274689 | 0,2406684 | 0,0026049 | 0,152 |
| A_32_P155364   | RPL7           | 0,5   | -0,26 | 0,00475256 | 0,1624924 | 0,0026218 | 0,152 |
| A_33_P3375527  | MIER3          | 0,34  | -0,43 | 0,06454338 | 0,0170413 | 0,0026256 | 0,152 |



|                |                |       |       |            |           |           |       |
|----------------|----------------|-------|-------|------------|-----------|-----------|-------|
| A_33_P3333364  |                | 0,52  | -0,24 | 0,00336967 | 0,2014557 | 0,0026543 | 0,153 |
| A_24_P233960   | SNX27          | -0,35 | 0,42  | 0,05763960 | 0,0200181 | 0,0026624 | 0,153 |
| A_23_P250164   | HGD            | 0,49  | -0,28 | 0,00716426 | 0,1336999 | 0,0026657 | 0,153 |
| A_21_P0013790  | XLOC_I2_015596 | 0,55  | -0,2  | 0,00170130 | 0,2912783 | 0,0026672 | 0,153 |
| A_33_P3265159  | GAPVD1         | 0,39  | -0,38 | 0,03225181 | 0,0385316 | 0,0026729 | 0,153 |
| A_23_P302018   | TXK            | -0,17 | 0,57  | 0,37210423 | 0,0012318 | 0,0026778 | 0,153 |
| A_33_P3393091  |                | -0,51 | 0,25  | 0,00440937 | 0,1856391 | 0,0026888 | 0,153 |
| A_24_P196019   |                | 0,55  | -0,19 | 0,00174254 | 0,3149268 | 0,0026946 | 0,153 |
| A_24_P145047   | ZNF609         | -0,28 | 0,48  | 0,12682667 | 0,0078382 | 0,0027001 | 0,153 |
| A_33_P3268612  | IL28RA         | -0,3  | 0,47  | 0,10404332 | 0,0102733 | 0,0027002 | 0,153 |
| A_33_P3211864  | ARMCX4         | -0,53 | 0,22  | 0,00269567 | 0,2504797 | 0,0027150 | 0,153 |
| A_21_P0005195  | XLOC_006193    | -0,33 | 0,44  | 0,07882501 | 0,0147828 | 0,0027246 | 0,153 |
| A_24_P98249    | TACC1          | -0,42 | 0,35  | 0,02219423 | 0,0559937 | 0,0027399 | 0,154 |
| A_33_P3323928  | LINC00263      | 0,26  | -0,5  | 0,17225190 | 0,0052481 | 0,0028177 | 0,156 |
| A_21_P0012873  | LOC100507387   | -0,12 | 0,6   | 0,54353833 | 0,0005470 | 0,0028207 | 0,156 |
| A_21_P0011807  | ANKRD36BP2     | -0,26 | 0,5   | 0,17148658 | 0,0052934 | 0,0028217 | 0,156 |
| A_21_P0006028  | XLOC_007458    | 0,51  | -0,24 | 0,00444838 | 0,1921878 | 0,0028348 | 0,156 |
| A_23_P306933   | PPTC7          | -0,44 | 0,33  | 0,01544876 | 0,0788250 | 0,0028356 | 0,156 |
| A_33_P3857239  | KRT42P         | 0,32  | -0,45 | 0,08633173 | 0,0138293 | 0,0028399 | 0,156 |
| A_23_P114445   | MAGEE1         | 0,48  | -0,28 | 0,00777475 | 0,1330639 | 0,0028421 | 0,156 |
| A_21_P0007816  | XLOC_009628    | -0,28 | 0,48  | 0,13691385 | 0,0068844 | 0,0028495 | 0,156 |
| A_23_P346800   | AVPR2          | -0,63 | 0,08  | 0,00029701 | 0,6807048 | 0,0028496 | 0,156 |
| A_21_P0012445  | XLOC_I2_010239 | -0,47 | 0,3   | 0,00938734 | 0,1110770 | 0,0028631 | 0,156 |
| A_24_P257579   | EPB41L4A       | 0,38  | -0,39 | 0,03893371 | 0,0337371 | 0,0028810 | 0,156 |
| A_23_P389102   | MYO1D          | -0,46 | 0,3   | 0,01101615 | 0,1045720 | 0,0028879 | 0,156 |
| A_23_P129103   | AGSK1          | -0,31 | 0,45  | 0,09210013 | 0,0122282 | 0,0028944 | 0,156 |
| A_19_P00316934 | XLOC_006805    | -0,43 | 0,34  | 0,01821133 | 0,0675806 | 0,0028991 | 0,156 |
| A_24_P322229   | RASL10B        | 0,28  | -0,48 | 0,13092528 | 0,0081619 | 0,0029021 | 0,156 |
| A_23_P105691   | GPRC5D         | -0,31 | 0,45  | 0,09243629 | 0,0130257 | 0,0029076 | 0,156 |

|               |             |       |       |            |           |           |       |
|---------------|-------------|-------|-------|------------|-----------|-----------|-------|
| A_33_P3252228 | NRSN1       | -0,1  | 0,61  | 0,59321348 | 0,0004538 | 0,0029136 | 0,156 |
| A_33_P3301095 |             | 0,42  | -0,35 | 0,02166001 | 0,0589839 | 0,0029303 | 0,157 |
| A_21_P0003729 | XLOC_003907 | 0,33  | -0,44 | 0,07925201 | 0,0160228 | 0,0029486 | 0,157 |
| A_21_P0001070 | XLOC_000604 | 0,43  | -0,33 | 0,01798132 | 0,0716866 | 0,0029576 | 0,157 |
| A_23_P151598  | CPNE6       | -0,23 | 0,52  | 0,21548720 | 0,0038934 | 0,0029625 | 0,157 |
| A_21_P0010798 | LOC646627   | 0,33  | -0,43 | 0,07383972 | 0,0177261 | 0,0029914 | 0,158 |
| A_33_P3650353 | SNORA33     | -0,46 | 0,31  | 0,01198536 | 0,1014303 | 0,0030028 | 0,158 |
| A_21_P0007133 | XLOC_009372 | -0,49 | 0,27  | 0,00681802 | 0,1524365 | 0,0030049 | 0,158 |
| A_33_P3380587 | EIF2C1      | -0,4  | 0,36  | 0,02791976 | 0,0483176 | 0,0030076 | 0,158 |
| A_24_P201531  | ARCN1       | -0,35 | 0,41  | 0,05797335 | 0,0236073 | 0,0030121 | 0,158 |
| A_21_P0002266 | XLOC_001613 | 0,46  | -0,3  | 0,01084727 | 0,1099721 | 0,0030208 | 0,158 |
| A_23_P410613  | C12orf23    | -0,31 | 0,46  | 0,10143027 | 0,0120769 | 0,0030230 | 0,158 |
| A_23_P43504   | ABCA2       | -0,52 | 0,23  | 0,00375594 | 0,2245921 | 0,0030438 | 0,159 |
| A_23_P322008  | TRHR        | -0,63 | 0,06  | 0,00022785 | 0,7653409 | 0,0030604 | 0,159 |
| A_21_P0000069 | VEPH1       | 0,38  | -0,39 | 0,04151090 | 0,0343905 | 0,0030679 | 0,159 |
| A_23_P142187  | HIF3A       | -0,23 | 0,51  | 0,21191769 | 0,0041815 | 0,0030692 | 0,159 |
| A_23_P615     | INSRR       | 0,32  | -0,44 | 0,08542093 | 0,0146072 | 0,0030876 | 0,159 |
| A_23_P129144  | MYZAP       | 0,46  | -0,3  | 0,01072902 | 0,1077873 | 0,0030913 | 0,159 |
| A_33_P3312049 |             | 0,28  | -0,47 | 0,12744039 | 0,0092757 | 0,0031387 | 0,160 |
| A_21_P0001443 | XLOC_000635 | 0,35  | -0,41 | 0,05678525 | 0,0249253 | 0,0031399 | 0,160 |
| A_21_P0001381 | XLOC_000447 | -0,07 | 0,63  | 0,72968278 | 0,0002756 | 0,0031404 | 0,160 |
| A_21_P0006970 | SFTA1P      | -0,22 | 0,52  | 0,23923384 | 0,0035576 | 0,0031588 | 0,161 |
| A_21_P0008928 | XLOC_011708 | 0,34  | -0,42 | 0,06910471 | 0,0195735 | 0,0031665 | 0,161 |
| A_21_P0010051 | XLOC_013778 | -0,33 | 0,43  | 0,07465301 | 0,0186329 | 0,0031686 | 0,161 |
| A_33_P3340324 | LOC345051   | -0,46 | 0,29  | 0,01093143 | 0,1144420 | 0,0031860 | 0,161 |
| A_33_P3320943 |             | 0,49  | -0,26 | 0,00654051 | 0,1647083 | 0,0031973 | 0,161 |
| A_33_P3220939 | PCID2       | 0,56  | -0,17 | 0,00125567 | 0,3800640 | 0,0032023 | 0,161 |
| A_23_P416468  | PIF1        | 0,56  | -0,17 | 0,00160819 | 0,3670111 | 0,0032099 | 0,161 |
| A_23_P327022  | MDFIC       | 0,43  | -0,33 | 0,01930417 | 0,0738397 | 0,0032342 | 0,162 |

|               |                |       |       |            |           |           |       |
|---------------|----------------|-------|-------|------------|-----------|-----------|-------|
| A_21_P0009181 | LOC100507351   | -0,36 | 0,4   | 0,05067588 | 0,0296356 | 0,0032511 | 0,163 |
| A_23_P314642  | ZNF280C        | -0,34 | 0,42  | 0,06682851 | 0,0220417 | 0,0032834 | 0,163 |
| A_21_P0010795 | XLOC_I2_001399 | 0,26  | -0,49 | 0,16769658 | 0,0065952 | 0,0032933 | 0,163 |
| A_24_P349547  |                | 0,43  | -0,33 | 0,01957825 | 0,0742455 | 0,0032957 | 0,163 |
| A_33_P3329878 | RNF216         | 0,32  | -0,44 | 0,08771201 | 0,0160228 | 0,0032991 | 0,163 |
| A_33_P3376836 |                | 0,35  | -0,41 | 0,05599367 | 0,0270159 | 0,0032992 | 0,163 |
| A_21_P0008784 | XLOC_011586    | -0,31 | 0,45  | 0,09585806 | 0,0143524 | 0,0033027 | 0,163 |
| A_33_P3229472 | KRTAP5-10      | -0,55 | 0,19  | 0,00214270 | 0,3254221 | 0,0033234 | 0,163 |
| A_23_P151150  | FOXMI          | -0,45 | 0,31  | 0,01372659 | 0,0998867 | 0,0033262 | 0,163 |
| A_33_P3351606 | LOC100130155   | -0,56 | 0,16  | 0,00138045 | 0,4035365 | 0,0033284 | 0,163 |
| A_32_P189592  | USHBP1         | 0,34  | -0,42 | 0,06795910 | 0,0220417 | 0,0033426 | 0,163 |
| A_33_P3251462 | C20orf141      | 0,4   | -0,36 | 0,03102176 | 0,0500778 | 0,0033558 | 0,164 |
| A_23_P420209  | GCNT3          | 0,49  | -0,26 | 0,00687471 | 0,1661976 | 0,0033710 | 0,164 |
| A_23_P169154  | ERMP1          | -0,47 | 0,28  | 0,00829315 | 0,1388694 | 0,0033723 | 0,164 |
| A_33_P3407424 | CDC42EP1       | -0,52 | 0,22  | 0,00396378 | 0,2349080 | 0,0033794 | 0,164 |
| A_23_P87491   | APOF           | 0,2   | -0,53 | 0,28365715 | 0,0028519 | 0,0033909 | 0,164 |
| A_32_P191527  | SETD8          | 0,44  | -0,32 | 0,01649480 | 0,0881759 | 0,0034061 | 0,164 |
| A_23_P28466   | WDR69          | 0,38  | -0,37 | 0,03698758 | 0,0428061 | 0,0034700 | 0,167 |
| A_32_P5251    | RARA           | -0,29 | 0,46  | 0,12379108 | 0,0101824 | 0,0034790 | 0,167 |
| A_21_P0010572 | XLOC_I2_000581 | 0,5   | -0,24 | 0,00543132 | 0,1988977 | 0,0034921 | 0,167 |
| A_33_P3259821 | DOCK9          | -0,39 | 0,36  | 0,03417156 | 0,0483176 | 0,0035522 | 0,169 |
| A_21_P0005121 | XLOC_005371    | -0,41 | 0,35  | 0,02683633 | 0,0598652 | 0,0035529 | 0,169 |
| A_21_P0013022 | XLOC_I2_012518 | -0,43 | 0,32  | 0,01876560 | 0,0827331 | 0,0035669 | 0,169 |
| A_21_P0001300 | XLOC_000205    | 0,32  | -0,43 | 0,08097801 | 0,0193042 | 0,0035750 | 0,169 |
| A_24_P458252  |                | -0,54 | 0,19  | 0,00267038 | 0,3065403 | 0,0035822 | 0,169 |
| A_21_P0001295 | XLOC_000186    | 0,33  | -0,42 | 0,07495881 | 0,0202357 | 0,0035838 | 0,169 |
| A_33_P3562810 | LOC286149      | 0,25  | -0,49 | 0,17767780 | 0,0067058 | 0,0035923 | 0,169 |
| A_32_P49668   | LOC100653060   | 0,37  | -0,38 | 0,04467414 | 0,0380523 | 0,0036452 | 0,172 |
| A_21_P0006954 | XLOC_008698    | -0,24 | 0,5   | 0,20490209 | 0,0054780 | 0,0036559 | 0,172 |

|                |                |       |       |            |           |           |       |
|----------------|----------------|-------|-------|------------|-----------|-----------|-------|
| A_24_P71904    | HPGD           | 0,18  | -0,55 | 0,34951611 | 0,0021220 | 0,0036766 | 0,172 |
| A_33_P3406547  |                | -0,33 | 0,42  | 0,07797641 | 0,0209978 | 0,0037046 | 0,172 |
| A_23_P376239   | PAPOLA         | 0,34  | -0,41 | 0,06534417 | 0,0257795 | 0,0037089 | 0,172 |
| A_24_P136641   | LOC100129250   | 0,51  | -0,22 | 0,00433224 | 0,2387378 | 0,0037096 | 0,172 |
| A_33_P3384657  |                | 0,38  | -0,37 | 0,03877300 | 0,0446741 | 0,0037127 | 0,172 |
| A_24_P178065   | PHLDB2         | -0,25 | 0,49  | 0,17846278 | 0,0069318 | 0,0037129 | 0,172 |
| A_21_P0008361  | XLOC_010883    | -0,28 | 0,47  | 0,14018455 | 0,0098793 | 0,0037130 | 0,172 |
| A_33_P3634554  | LOC284108      | -0,43 | 0,32  | 0,01785331 | 0,0895788 | 0,0037213 | 0,172 |
| A_21_P0003170  | XLOC_003240    | -0,38 | 0,37  | 0,03757797 | 0,0463272 | 0,0037339 | 0,172 |
| A_23_P366394   | ZAK            | 0,43  | -0,32 | 0,01876560 | 0,0863317 | 0,0037371 | 0,172 |
| A_24_P119609   | MYO1D          | 0,37  | -0,38 | 0,04200614 | 0,0410018 | 0,0037570 | 0,172 |
| A_21_P0004164  | XLOC_004944    | 0,26  | -0,48 | 0,15812558 | 0,0084291 | 0,0037581 | 0,172 |
| A_33_P3424057  | PEG3           | 0,5   | -0,23 | 0,00538500 | 0,2128062 | 0,0037892 | 0,173 |
| A_21_P0012187  | XLOC_I2_009140 | 0,38  | -0,37 | 0,03805233 | 0,0459741 | 0,0038120 | 0,173 |
| A_19_P00321670 | XLOC_005730    | -0,42 | 0,33  | 0,02265724 | 0,0750623 | 0,0038123 | 0,173 |
| A_21_P0005423  | XLOC_006229    | 0,27  | -0,47 | 0,14303294 | 0,0099571 | 0,0038216 | 0,173 |
| A_21_P0011629  | XLOC_I2_005916 | 0,47  | -0,27 | 0,00995710 | 0,1441850 | 0,0038663 | 0,174 |
| A_19_P00318114 | Q6NT14         | 0,32  | -0,42 | 0,08229159 | 0,0207073 | 0,0038772 | 0,174 |
| A_21_P0008798  | XLOC_011603    | 0,33  | -0,42 | 0,07630058 | 0,0226572 | 0,0038797 | 0,174 |
| A_23_P211039   | ADAMTS1        | 0,35  | -0,39 | 0,05502424 | 0,0326706 | 0,0038818 | 0,174 |
| A_21_P0006237  | XLOC_007597    | -0,42 | 0,32  | 0,02114437 | 0,0809780 | 0,0038833 | 0,174 |
| A_21_P0014859  | LOC100652728   | -0,23 | 0,5   | 0,21819145 | 0,0053390 | 0,0038892 | 0,174 |
| A_33_P3314446  | NF1P2          | 0,31  | -0,43 | 0,09195524 | 0,0174242 | 0,0039019 | 0,174 |
| A_21_P0005246  | XLOC_006164    | -0,14 | 0,57  | 0,47224194 | 0,0012064 | 0,0039123 | 0,175 |
| A_21_P0000919  | XLOC_000480    | -0,45 | 0,29  | 0,01254374 | 0,1237911 | 0,0039340 | 0,175 |
| A_21_P0011909  | XLOC_I2_007967 | -0,33 | 0,42  | 0,07495881 | 0,0225216 | 0,0039402 | 0,175 |
| A_33_P3249589  | BCL11A         | -0,54 | 0,17  | 0,00224897 | 0,3557051 | 0,0039481 | 0,175 |
| A_23_P354798   | COQ10A         | -0,35 | 0,39  | 0,05730737 | 0,0310931 | 0,0039579 | 0,175 |
| A_33_P3419204  |                | 0,55  | -0,16 | 0,00166367 | 0,3839566 | 0,0039735 | 0,175 |

|                |              |       |       |            |           |           |       |
|----------------|--------------|-------|-------|------------|-----------|-----------|-------|
| A_19_P00318511 | XLOC_002504  | 0,34  | -0,41 | 0,06736918 | 0,0266577 | 0,0039853 | 0,176 |
| A_24_P32627    |              | 0,41  | -0,34 | 0,02577949 | 0,0702654 | 0,0040032 | 0,176 |
| A_21_P0000946  | XLOC_000043  | -0,41 | 0,34  | 0,02630353 | 0,0694899 | 0,0040312 | 0,177 |
| A_21_P0005155  | XLOC_005621  | 0,18  | -0,54 | 0,33456301 | 0,0026453 | 0,0040479 | 0,177 |
| A_33_P3213892  | PRDM15       | 0,44  | -0,3  | 0,01613972 | 0,1049021 | 0,0040631 | 0,177 |
| A_33_P3212930  |              | -0,49 | 0,24  | 0,00632552 | 0,2031738 | 0,0040654 | 0,177 |
| A_33_P3379017  | HIC2         | 0,36  | -0,38 | 0,05067588 | 0,0375780 | 0,0040849 | 0,178 |
| A_33_P3309289  | ST3GAL4      | 0,28  | -0,46 | 0,13868980 | 0,0112737 | 0,0040955 | 0,178 |
| A_24_P306726   | TPT1         | 0,5   | -0,23 | 0,00533594 | 0,2145910 | 0,0041119 | 0,178 |
| A_21_P0002204  | XLOC_001446  | 0,28  | -0,46 | 0,13369991 | 0,0118944 | 0,0041126 | 0,178 |
| A_33_P3355503  | FOXL1        | 0,41  | -0,33 | 0,02509423 | 0,0742455 | 0,0041390 | 0,178 |
| A_21_P0004864  | LOC100507100 | -0,26 | 0,47  | 0,15957163 | 0,0093494 | 0,0041454 | 0,178 |
| A_33_P3294103  |              | -0,48 | 0,25  | 0,00822802 | 0,1745625 | 0,0041625 | 0,178 |
| A_33_P3240263  | POMP         | 0,24  | -0,49 | 0,19385010 | 0,0064252 | 0,0041631 | 0,178 |

**Supplemental Information 10**

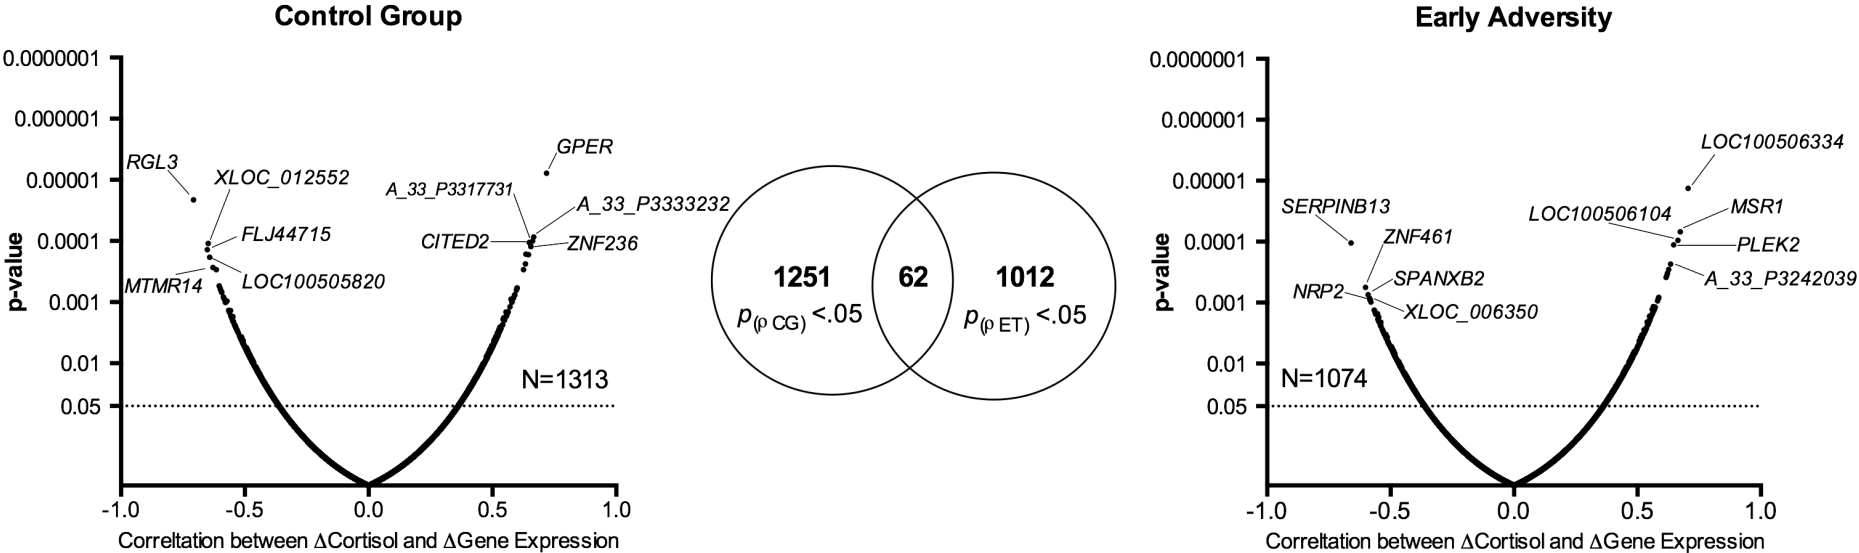

The figure shows the number of transcripts for which gene expression change from pre- to 180 minutes post-stress correlated significantly with cortisol increases in the TSST.

Pathway analyses showed enrichment of correlated genes in *MAPK signaling pathway* (p=.02) and *glycerolipid metabolism* (p=.009) in the control group, whereas an enrichment in *focal adhesion* (p=.04) and *axon guidance* (p=.01) pathways was observed for the EA group. Transcripts are shown below.

| KEGG <i>MAPK signaling</i> |       |       |         |
|----------------------------|-------|-------|---------|
| Transcript                 | ρ CG  | ρ EA  | p value |
| <i>DUSP1</i>               | 0,54  | 0,17  | ns      |
| <i>MAPK8IP1</i>            | 0,49  | 0,02  | ns      |
| <i>CACNA1H</i>             | 0,46  | 0,21  | ns      |
| <i>ZAK</i>                 | 0,41  | 0,05  | ns      |
| <i>FOS</i>                 | 0,41  | 0,07  | ns      |
| <i>MAP2K6</i>              | 0,38  | 0,19  | ns      |
| <i>FGF7</i>                | 0,37  | -0,28 | <0.05   |
| <i>RPS6KA6</i>             | 0,37  | 0,03  | ns      |
| <i>PPP3R1</i>              | 0,36  | -0,13 | ns      |
| <i>IKBKB</i>               | -0,37 | 0,16  | <0.05   |
| <i>TGFBR2</i>              | -0,39 | 0,17  | <0.05   |
| <i>CACNB4</i>              | -0,43 | -0,28 | ns      |
| <i>MAP4K3</i>              | -0,53 | -0,06 | ns      |
| <i>RPS6KA2</i>             | -0,55 | -0,38 | ns      |

| KEGG <i>glycerolipid metabolism</i> |       |       |         |
|-------------------------------------|-------|-------|---------|
| Transcript                          | ρ CG  | ρ EA  | p value |
| <i>LIPC</i>                         | 0,51  | 0,18  | ns      |
| <i>LPL</i>                          | 0,40  | -0,02 | ns      |
| <i>DGKB</i>                         | 0,38  | 0,16  | ns      |
| <i>ADH6</i>                         | -0,38 | 0,02  | ns      |
| <i>DGKZ</i>                         | -0,41 | 0,11  | <0.05   |
| <i>PPAP2C</i>                       | -0,41 | 0,09  | 0.05    |

| KEGG focal adhesion |           |           |         |
|---------------------|-----------|-----------|---------|
| Transcript          | $\rho$ CG | $\rho$ EA | p value |
| <i>COL5A1</i>       | -0,04     | 0,42      | ns      |
| <i>PAK1</i>         | -0,27     | 0,41      | <0.01   |
| <i>EGFR</i>         | 0,25      | 0,39      | ns      |
| <i>FLNA</i>         | -0,17     | 0,38      | <0.05   |
| <i>ARHGAP5</i>      | -0,35     | 0,37      | <0.01   |
| <i>PAK6</i>         | 0,08      | -0,41     | ns      |
| <i>LAMB1</i>        | -0,12     | -0,41     | ns      |
| <i>BCL2</i>         | 0,34      | -0,44     | <0.01   |
| <i>CCND2</i>        | -0,08     | -0,45     | ns      |

| KEGG axon guidance |           |           |         |
|--------------------|-----------|-----------|---------|
| Transcript         | $\rho$ CG | $\rho$ EA | p value |
| <i>SEMA6B</i>      | -0,16     | 0,58      | <0.01   |
| <i>CXCR4</i>       | 0,20      | 0,42      | ns      |
| <i>PAK1</i>        | -0,27     | 0,41      | <0.01   |
| <i>SEMA6C</i>      | -0,04     | 0,40      | ns      |
| <i>SEMA4B</i>      | 0,16      | -0,40     | <0.05   |
| <i>EPHA4</i>       | 0,33      | -0,40     | <0.01   |
| <i>PAK6</i>        | 0,08      | -0,41     | ns      |
| <i>EPHA1</i>       | -0,37     | -0,41     | ns      |

### Supplemental Table 10

The table shows the top 500 transcripts with significant differences between groups in the correlations between cortisol increases and gene expression changes from pre- to 180-minutes post-stress. The  $p$ -values result from the comparison of the z-transformed correlation coefficients of the two groups (Spearman's  $\rho$ ). The  $p$ -values were multiplicity-adjusted to control the false discovery rate (FDR) by the Benjamini-Hochberg procedure.

| Agilent Probe ID | Gene Symbol  | $\rho$ Control Group | $\rho$ Early Adversity | p-value Control Group | p-value Early Adversity | p-value delta $\rho$ | adj. p-value |
|------------------|--------------|----------------------|------------------------|-----------------------|-------------------------|----------------------|--------------|
| A_23_P70968      | HOXA7        | 0,56                 | -0,50                  | 0,0016                | 0,0053                  | 0,00002              | 0,319        |
| A_33_P3671729    | FLJ44715     | -0,65                | 0,34                   | 0,0001                | 0,0646                  | 0,00003              | 0,319        |
| A_33_P3251322    | MTMR14       | -0,63                | 0,36                   | 0,0003                | 0,0544                  | 0,00004              | 0,319        |
| A_32_P206104     |              | 0,41                 | -0,56                  | 0,0265                | 0,0015                  | 0,00009              | 0,467        |
| A_33_P3258772    | LOC100506816 | -0,57                | 0,37                   | 0,0014                | 0,0425                  | 0,00015              | 0,467        |



|                |              |       |       |        |        |         |       |
|----------------|--------------|-------|-------|--------|--------|---------|-------|
| A_33_P3372869  | DDX52        | -0,58 | 0,35  | 0,0009 | 0,0590 | 0,00015 | 0,467 |
| A_33_P3356392  | RGL3         | -0,71 | 0,14  | 0,0000 | 0,4606 | 0,00017 | 0,467 |
| A_21_P0010373  | XLOC_014330  | -0,36 | 0,56  | 0,0486 | 0,0016 | 0,00020 | 0,467 |
| A_24_P323072   | GNRH2        | -0,52 | 0,41  | 0,0039 | 0,0272 | 0,00023 | 0,467 |
| A_24_P56330    | C13orf16     | -0,31 | 0,59  | 0,0989 | 0,0008 | 0,00028 | 0,467 |
| A_33_P3360912  | ZNF236       | 0,66  | -0,19 | 0,0001 | 0,3035 | 0,00031 | 0,467 |
| A_33_P3275653  | GRM5         | 0,56  | -0,34 | 0,0017 | 0,0672 | 0,00032 | 0,467 |
| A_23_P348257   | NUAK1        | 0,46  | -0,44 | 0,0121 | 0,0149 | 0,00037 | 0,467 |
| A_33_P3238250  | F11R         | -0,47 | 0,43  | 0,0096 | 0,0192 | 0,00038 | 0,467 |
| A_33_P3320277  | MFN2         | 0,48  | -0,42 | 0,0075 | 0,0217 | 0,00039 | 0,467 |
| A_33_P3214925  | MIB2         | -0,46 | 0,43  | 0,0107 | 0,0181 | 0,00040 | 0,467 |
| A_21_P0012055  | LINC00487    | -0,56 | 0,32  | 0,0014 | 0,0866 | 0,00043 | 0,467 |
| A_33_P3321642  | GRHL2        | -0,22 | 0,63  | 0,2446 | 0,0003 | 0,00043 | 0,467 |
| A_24_P366566   | OR5H1        | -0,44 | 0,44  | 0,0150 | 0,0152 | 0,00048 | 0,467 |
| A_21_P0004585  | XLOC_005088  | -0,35 | 0,53  | 0,0617 | 0,0031 | 0,00049 | 0,467 |
| A_33_P3415255  | VN1R1        | -0,41 | 0,47  | 0,0256 | 0,0093 | 0,00051 | 0,467 |
| A_21_P0013985  | LOC100507494 | -0,31 | 0,55  | 0,0920 | 0,0019 | 0,00052 | 0,467 |
| A_23_P426835   | LOC729652    | -0,37 | 0,51  | 0,0449 | 0,0049 | 0,00052 | 0,467 |
| A_33_P3544880  | LOC142937    | -0,47 | 0,41  | 0,0099 | 0,0261 | 0,00056 | 0,467 |
| A_33_P3252491  |              | -0,39 | 0,48  | 0,0325 | 0,0079 | 0,00057 | 0,467 |
| A_33_P3249589  | BCL11A       | -0,38 | 0,49  | 0,0407 | 0,0061 | 0,00057 | 0,467 |
| A_24_P170067   |              | 0,43  | -0,43 | 0,0192 | 0,0172 | 0,00073 | 0,520 |
| A_33_P3324137  | PRO0628      | -0,60 | 0,22  | 0,0006 | 0,2378 | 0,00074 | 0,520 |
| A_21_P0002097  | XLOC_002299  | -0,42 | 0,44  | 0,0222 | 0,0158 | 0,00075 | 0,520 |
| A_21_P0008935  | XLOC_011718  | -0,29 | 0,55  | 0,1179 | 0,0017 | 0,00075 | 0,520 |
| A_21_P0005613  | XLOC_006677  | -0,38 | 0,47  | 0,0410 | 0,0086 | 0,00080 | 0,520 |
| A_33_P3764744  |              | -0,52 | 0,33  | 0,0039 | 0,0788 | 0,00083 | 0,520 |
| A_19_P00321061 | LOC100499221 | 0,52  | -0,32 | 0,0035 | 0,0877 | 0,00085 | 0,520 |
| A_23_P117602   | GZMB         | 0,56  | -0,27 | 0,0017 | 0,1464 | 0,00087 | 0,520 |

|                |                |       |       |        |        |         |       |
|----------------|----------------|-------|-------|--------|--------|---------|-------|
| A_23_P48784    | CYP46A1        | -0,51 | 0,33  | 0,0043 | 0,0771 | 0,00087 | 0,520 |
| A_19_P00316844 | HCG18          | -0,53 | 0,31  | 0,0031 | 0,0984 | 0,00087 | 0,520 |
| A_19_P00808382 | LOC100506334   | -0,02 | 0,71  | 0,9345 | 0,0000 | 0,00102 | 0,527 |
| A_19_P00319588 | XLOC_003202    | 0,49  | -0,34 | 0,0060 | 0,0646 | 0,00104 | 0,527 |
| A_24_P932416   | TMEM14E        | -0,55 | 0,27  | 0,0021 | 0,1462 | 0,00105 | 0,527 |
| A_21_P0009347  | XLOC_012552    | -0,65 | 0,12  | 0,0001 | 0,5403 | 0,00111 | 0,527 |
| A_23_P17430    | RBM38          | 0,33  | -0,49 | 0,0741 | 0,0060 | 0,00113 | 0,527 |
| A_33_P3598363  | LOC400662      | -0,49 | 0,34  | 0,0072 | 0,0653 | 0,00114 | 0,527 |
| A_23_P24676    | OR8U1          | -0,45 | 0,38  | 0,0135 | 0,0383 | 0,00114 | 0,527 |
| A_33_P3292724  |                | -0,42 | 0,41  | 0,0223 | 0,0239 | 0,00114 | 0,527 |
| A_23_P107801   | C19orf44       | -0,37 | 0,46  | 0,0444 | 0,0117 | 0,00117 | 0,527 |
| A_33_P3333232  |                | 0,67  | -0,08 | 0,0001 | 0,6876 | 0,00120 | 0,527 |
| A_21_P0000708  | C14orf55       | 0,48  | -0,35 | 0,0079 | 0,0604 | 0,00122 | 0,527 |
| A_33_P3329686  | Aug 01         | 0,33  | -0,49 | 0,0738 | 0,0061 | 0,00124 | 0,527 |
| A_33_P3288491  | KLHL38         | -0,34 | 0,48  | 0,0668 | 0,0070 | 0,00124 | 0,527 |
| A_21_P0009758  | XLOC_013291    | -0,43 | 0,40  | 0,0189 | 0,0312 | 0,00127 | 0,527 |
| A_21_P0004110  | XLOC_004752    | 0,63  | -0,13 | 0,0002 | 0,4959 | 0,00128 | 0,527 |
| A_32_P126609   | SMC5           | 0,28  | -0,52 | 0,1287 | 0,0033 | 0,00132 | 0,527 |
| A_21_P0003319  | XLOC_003737    | -0,24 | 0,56  | 0,1947 | 0,0017 | 0,00132 | 0,527 |
| A_23_P81018    | PDHA2          | -0,34 | 0,47  | 0,0632 | 0,0088 | 0,00133 | 0,527 |
| A_21_P0012981  | XLOC_I2_011987 | 0,26  | -0,54 | 0,1647 | 0,0025 | 0,00141 | 0,531 |
| A_33_P3347012  |                | -0,42 | 0,40  | 0,0222 | 0,0289 | 0,00142 | 0,531 |
| A_33_P3345816  | GPFR           | 0,72  | 0,04  | 0,0000 | 0,8491 | 0,00142 | 0,531 |
| A_21_P0014180  | GPR146         | -0,55 | 0,24  | 0,0019 | 0,1945 | 0,00145 | 0,531 |
| A_33_P3821494  | LOC284939      | 0,29  | -0,51 | 0,1150 | 0,0044 | 0,00147 | 0,531 |
| A_33_P3742500  | LOC642947      | -0,44 | 0,37  | 0,0160 | 0,0428 | 0,00151 | 0,531 |
| A_24_P141227   | LMX1B          | -0,49 | 0,32  | 0,0072 | 0,0830 | 0,00151 | 0,531 |
| A_23_P345674   | ZNF71          | 0,48  | -0,33 | 0,0084 | 0,0763 | 0,00157 | 0,532 |
| A_21_P0014806  | LOC100507131   | -0,48 | 0,32  | 0,0073 | 0,0819 | 0,00162 | 0,532 |

|               |                |       |       |        |        |         |       |
|---------------|----------------|-------|-------|--------|--------|---------|-------|
| A_32_P199884  | HORMAD1        | -0,36 | 0,44  | 0,0489 | 0,0143 | 0,00165 | 0,532 |
| A_24_P941167  | APOL6          | -0,34 | 0,46  | 0,0672 | 0,0105 | 0,00167 | 0,532 |
| A_24_P221092  |                | -0,42 | 0,38  | 0,0203 | 0,0381 | 0,00168 | 0,532 |
| A_33_P3259821 | DOCK9          | -0,39 | 0,41  | 0,0333 | 0,0234 | 0,00168 | 0,532 |
| A_33_P3331911 |                | -0,49 | 0,31  | 0,0066 | 0,0979 | 0,00170 | 0,532 |
| A_33_P3368950 | C5orf65        | -0,32 | 0,48  | 0,0819 | 0,0086 | 0,00174 | 0,532 |
| A_21_P0007750 | XLOC_010176    | -0,31 | 0,49  | 0,0959 | 0,0064 | 0,00174 | 0,532 |
| A_33_P3239185 | SYT7           | 0,49  | -0,31 | 0,0069 | 0,1004 | 0,00183 | 0,544 |
| A_21_P0009809 | HSPC072        | -0,33 | 0,46  | 0,0742 | 0,0104 | 0,00184 | 0,544 |
| A_33_P3223111 |                | -0,49 | 0,30  | 0,0061 | 0,1046 | 0,00187 | 0,544 |
| A_23_P102364  | NGEF           | -0,55 | 0,23  | 0,0021 | 0,2228 | 0,00190 | 0,544 |
| A_33_P3234267 | LOC100130442   | -0,59 | 0,16  | 0,0007 | 0,4009 | 0,00193 | 0,544 |
| A_21_P0008062 | XLOC_010384    | -0,54 | 0,23  | 0,0024 | 0,2146 | 0,00196 | 0,544 |
| A_33_P3370449 | GOT1L1         | -0,38 | 0,42  | 0,0398 | 0,0230 | 0,00198 | 0,544 |
| A_23_P79816   | EMILIN3        | -0,25 | 0,53  | 0,1889 | 0,0030 | 0,00198 | 0,544 |
| A_21_P0011021 | LOC650368      | -0,54 | 0,23  | 0,0025 | 0,2110 | 0,00202 | 0,549 |
| A_21_P0002494 | XLOC_002283    | 0,55  | -0,21 | 0,0015 | 0,2647 | 0,00206 | 0,553 |
| A_33_P3262833 | GOLGA8E        | 0,31  | -0,48 | 0,0959 | 0,0086 | 0,00209 | 0,553 |
| A_24_P276531  | SNIP1          | 0,32  | -0,47 | 0,0901 | 0,0096 | 0,00229 | 0,553 |
| A_21_P0010149 | XLOC_013885    | 0,45  | -0,33 | 0,0139 | 0,0714 | 0,00231 | 0,553 |
| A_33_P3263651 | SEMA6B         | -0,16 | 0,58  | 0,4009 | 0,0009 | 0,00232 | 0,553 |
| A_21_P0013458 | XLOC_I2_014061 | 0,29  | -0,48 | 0,1155 | 0,0069 | 0,00233 | 0,553 |
| A_21_P0005411 | XLOC_006192    | 0,58  | -0,16 | 0,0009 | 0,4076 | 0,00236 | 0,553 |
| A_21_P0008386 | XLOC_010929    | 0,53  | -0,23 | 0,0029 | 0,2191 | 0,00237 | 0,553 |
| A_33_P3417437 | CD164L2        | -0,47 | 0,30  | 0,0093 | 0,1025 | 0,00242 | 0,553 |
| A_21_P0001723 | XLOC_000746    | -0,51 | 0,25  | 0,0044 | 0,1738 | 0,00245 | 0,553 |
| A_23_P369701  | FAM108C1       | 0,29  | -0,48 | 0,1196 | 0,0076 | 0,00246 | 0,553 |
| A_21_P0013022 | XLOC_I2_012518 | -0,37 | 0,41  | 0,0420 | 0,0272 | 0,00247 | 0,553 |
| A_23_P352266  | BCL2           | 0,34  | -0,44 | 0,0693 | 0,0147 | 0,00248 | 0,553 |

|                |                |       |       |        |        |         |       |
|----------------|----------------|-------|-------|--------|--------|---------|-------|
| A_19_P00322219 | MIAT           | -0,32 | 0,46  | 0,0896 | 0,0114 | 0,00248 | 0,553 |
| A_21_P0009952  | XLOC_013495    | 0,40  | -0,38 | 0,0276 | 0,0408 | 0,00256 | 0,553 |
| A_33_P3305497  | NCKAP5L        | -0,48 | 0,28  | 0,0074 | 0,1274 | 0,00259 | 0,553 |
| A_21_P0014587  | LOC100507058   | 0,24  | -0,52 | 0,2015 | 0,0033 | 0,00262 | 0,553 |
| A_23_P83498    | IGF2BP1        | 0,39  | -0,38 | 0,0318 | 0,0385 | 0,00264 | 0,553 |
| A_21_P0004481  | XLOC_004244    | 0,40  | -0,37 | 0,0279 | 0,0439 | 0,00265 | 0,553 |
| A_33_P3289845  | IGFL1          | -0,38 | 0,40  | 0,0402 | 0,0312 | 0,00271 | 0,553 |
| A_33_P3333900  | LOC100129572   | -0,38 | 0,39  | 0,0383 | 0,0333 | 0,00274 | 0,553 |
| A_21_P0011252  | XLOC_I2_004222 | 0,36  | -0,41 | 0,0513 | 0,0237 | 0,00274 | 0,553 |
| A_19_P00320685 | XLOC_011430    | 0,34  | -0,43 | 0,0660 | 0,0184 | 0,00276 | 0,553 |
| A_24_P305784   | SPANXB2        | 0,14  | -0,59 | 0,4752 | 0,0007 | 0,00276 | 0,553 |
| A_21_P0014594  | LOC100505820   | -0,64 | 0,05  | 0,0002 | 0,7797 | 0,00277 | 0,553 |
| A_21_P0013783  | XLOC_I2_015585 | 0,25  | -0,51 | 0,1864 | 0,0046 | 0,00280 | 0,553 |
| A_24_P213763   |                | -0,58 | 0,15  | 0,0010 | 0,4226 | 0,00281 | 0,553 |
| A_33_P3345812  | GPER           | 0,58  | -0,15 | 0,0010 | 0,4295 | 0,00282 | 0,553 |
| A_23_P150595   | TPH1           | 0,31  | -0,46 | 0,0959 | 0,0115 | 0,00287 | 0,553 |
| A_24_P101304   | ZNF568         | 0,34  | -0,42 | 0,0635 | 0,0204 | 0,00290 | 0,553 |
| A_32_P206479   | ZNF831         | 0,38  | -0,39 | 0,0398 | 0,0334 | 0,00293 | 0,553 |
| A_33_P3319640  | HDGFRP2        | 0,45  | -0,32 | 0,0144 | 0,0863 | 0,00294 | 0,553 |
| A_21_P0004192  | XLOC_005094    | -0,22 | 0,53  | 0,2495 | 0,0030 | 0,00295 | 0,553 |
| A_33_P3262217  |                | -0,39 | 0,38  | 0,0333 | 0,0415 | 0,00297 | 0,553 |
| A_33_P3461633  | LOC284454      | 0,44  | -0,33 | 0,0167 | 0,0776 | 0,00300 | 0,553 |
| A_21_P0000349  | SCARNA3        | -0,50 | 0,26  | 0,0058 | 0,1692 | 0,00300 | 0,553 |
| A_21_P0010073  | KCNQ2          | -0,56 | 0,18  | 0,0017 | 0,3471 | 0,00303 | 0,553 |
| A_21_P0013347  | XLOC_I2_013978 | 0,41  | -0,36 | 0,0258 | 0,0525 | 0,00305 | 0,553 |
| A_21_P0007181  | XLOC_009075    | -0,34 | 0,42  | 0,0632 | 0,0219 | 0,00307 | 0,553 |
| A_21_P0001744  | XLOC_001048    | 0,27  | -0,49 | 0,1531 | 0,0070 | 0,00311 | 0,553 |
| A_21_P0002977  | XLOC_002707    | 0,49  | -0,26 | 0,0060 | 0,1719 | 0,00314 | 0,553 |
| A_21_P0006458  | XLOC_008205    | -0,26 | 0,49  | 0,1718 | 0,0061 | 0,00318 | 0,553 |

|                |              |       |       |        |        |         |       |
|----------------|--------------|-------|-------|--------|--------|---------|-------|
| A_33_P3419865  | LOC646719    | -0,32 | 0,44  | 0,0814 | 0,0169 | 0,00318 | 0,553 |
| A_33_P3359253  | MAD2L2       | -0,54 | 0,20  | 0,0024 | 0,2990 | 0,00318 | 0,553 |
| A_23_P51711    | CELA2B       | -0,39 | 0,37  | 0,0337 | 0,0441 | 0,00320 | 0,553 |
| A_21_P0014891  | LOC100652907 | -0,19 | 0,54  | 0,3080 | 0,0023 | 0,00325 | 0,557 |
| A_33_P3342992  | UBE2Q2P2     | -0,25 | 0,49  | 0,1761 | 0,0061 | 0,00329 | 0,558 |
| A_23_P102607   | CHD6         | -0,46 | 0,29  | 0,0098 | 0,1220 | 0,00331 | 0,558 |
| A_23_P402331   | WFDC5        | 0,63  | -0,06 | 0,0003 | 0,7457 | 0,00344 | 0,574 |
| A_33_P3400152  | LOC728558    | 0,30  | -0,45 | 0,1051 | 0,0134 | 0,00346 | 0,574 |
| A_23_P129005   | NYNRIN       | -0,49 | 0,26  | 0,0068 | 0,1723 | 0,00350 | 0,577 |
| ERCC-00019_219 |              | -0,15 | 0,57  | 0,4309 | 0,0013 | 0,00357 | 0,579 |
| A_23_P94754    | TNFSF15      | -0,31 | 0,44  | 0,0969 | 0,0156 | 0,00359 | 0,579 |
| A_33_P3226129  |              | -0,43 | 0,32  | 0,0192 | 0,0819 | 0,00359 | 0,579 |
| A_23_P162449   | SRGAP1       | 0,51  | -0,23 | 0,0046 | 0,2287 | 0,00366 | 0,584 |
| A_21_P0011267  | LOC283547    | -0,51 | 0,22  | 0,0043 | 0,2387 | 0,00368 | 0,584 |
| A_21_P0009097  | LOC653550    | 0,46  | -0,28 | 0,0117 | 0,1287 | 0,00388 | 0,607 |
| A_23_P68547    | MCM8         | -0,57 | 0,13  | 0,0010 | 0,4834 | 0,00395 | 0,607 |
| A_21_P0008755  | XLOC_011520  | 0,57  | -0,13 | 0,0009 | 0,4974 | 0,00399 | 0,607 |
| A_21_P0007579  | XLOC_009800  | 0,29  | -0,45 | 0,1232 | 0,0128 | 0,00399 | 0,607 |
| A_33_P3251901  | APBB2        | 0,43  | -0,31 | 0,0168 | 0,0979 | 0,00405 | 0,607 |
| A_23_P90888    | CHRNA1       | 0,34  | -0,41 | 0,0707 | 0,0260 | 0,00405 | 0,607 |
| A_33_P3422030  | FXVD5        | -0,37 | 0,37  | 0,0425 | 0,0449 | 0,00416 | 0,607 |
| A_21_P0004904  | XLOC_005368  | 0,25  | -0,48 | 0,1777 | 0,0080 | 0,00417 | 0,607 |
| A_33_P3364904  | ZNF662       | 0,41  | -0,33 | 0,0246 | 0,0763 | 0,00418 | 0,607 |
| A_33_P3480395  | FLJ30901     | 0,50  | -0,23 | 0,0056 | 0,2246 | 0,00418 | 0,607 |
| A_21_P0000174  | C5orf56      | -0,40 | 0,34  | 0,0279 | 0,0668 | 0,00420 | 0,607 |
| A_21_P0010512  | LOC728716    | -0,29 | 0,45  | 0,1226 | 0,0137 | 0,00421 | 0,607 |
| A_33_P3392213  |              | 0,50  | -0,22 | 0,0052 | 0,2368 | 0,00422 | 0,607 |
| A_33_P3254306  | FLCN         | -0,44 | 0,30  | 0,0159 | 0,1100 | 0,00422 | 0,607 |
| A_23_P215341   | FKBP14       | -0,35 | 0,38  | 0,0550 | 0,0371 | 0,00438 | 0,618 |

|               |                |       |       |        |        |         |       |
|---------------|----------------|-------|-------|--------|--------|---------|-------|
| A_33_P3306272 | KIAA0825       | 0,44  | -0,29 | 0,0157 | 0,1150 | 0,00439 | 0,618 |
| A_33_P3321796 |                | -0,24 | 0,49  | 0,2093 | 0,0067 | 0,00440 | 0,618 |
| A_24_P194886  | EHBP1          | -0,39 | 0,35  | 0,0364 | 0,0566 | 0,00443 | 0,618 |
| A_33_P3285092 | LOC100129763   | -0,29 | 0,44  | 0,1208 | 0,0152 | 0,00452 | 0,618 |
| A_33_P3518572 | LOC100287314   | 0,51  | -0,20 | 0,0038 | 0,2783 | 0,00456 | 0,618 |
| A_33_P3229472 | KRTAP5-10      | -0,25 | 0,47  | 0,1753 | 0,0091 | 0,00456 | 0,618 |
| A_21_P0009951 | XLOC_013490    | 0,41  | -0,33 | 0,0258 | 0,0797 | 0,00457 | 0,618 |
| A_21_P0000392 | SNORD98        | -0,47 | 0,25  | 0,0083 | 0,1800 | 0,00462 | 0,618 |
| A_21_P0009444 | XLOC_012614    | 0,30  | -0,43 | 0,1035 | 0,0192 | 0,00465 | 0,618 |
| A_23_P108501  | EPHA4          | 0,33  | -0,40 | 0,0776 | 0,0274 | 0,00470 | 0,618 |
| A_21_P0000625 | LOC100289361   | 0,38  | -0,36 | 0,0413 | 0,0527 | 0,00471 | 0,618 |
| A_33_P3245620 |                | 0,53  | -0,18 | 0,0029 | 0,3302 | 0,00472 | 0,618 |
| A_33_P3376925 |                | 0,30  | -0,43 | 0,1067 | 0,0189 | 0,00475 | 0,618 |
| A_33_P3253687 | GVINP1         | -0,40 | 0,34  | 0,0308 | 0,0707 | 0,00475 | 0,618 |
| A_23_P321846  | KCNS1          | 0,18  | -0,53 | 0,3410 | 0,0031 | 0,00477 | 0,618 |
| A_33_P3479066 | RPL13P5        | -0,16 | 0,54  | 0,4103 | 0,0022 | 0,00479 | 0,618 |
| A_23_P416212  | HSPB9          | -0,37 | 0,36  | 0,0480 | 0,0474 | 0,00493 | 0,629 |
| A_21_P0003797 | XLOC_004165    | 0,63  | -0,02 | 0,0002 | 0,9345 | 0,00493 | 0,629 |
| A_33_P3370890 | C6orf225       | 0,26  | -0,46 | 0,1632 | 0,0114 | 0,00502 | 0,630 |
| A_21_P0005909 | XLOC_007223    | -0,49 | 0,23  | 0,0069 | 0,2274 | 0,00503 | 0,630 |
| A_33_P3374758 | DYNC1LI2       | -0,28 | 0,44  | 0,1274 | 0,0163 | 0,00509 | 0,630 |
| A_21_P0006006 | XLOC_007342    | -0,04 | 0,62  | 0,8197 | 0,0004 | 0,00512 | 0,630 |
| A_33_P3329241 |                | -0,37 | 0,36  | 0,0477 | 0,0510 | 0,00518 | 0,630 |
| A_33_P3403666 | NDOR1          | 0,36  | -0,36 | 0,0483 | 0,0501 | 0,00522 | 0,630 |
| A_21_P0000936 | XLOC_001265    | -0,43 | 0,29  | 0,0180 | 0,1208 | 0,00523 | 0,630 |
| A_32_P806841  | ARL4A          | 0,48  | -0,23 | 0,0067 | 0,2255 | 0,00523 | 0,630 |
| A_23_P151506  | PLEK2          | 0,01  | 0,65  | 0,9588 | 0,0001 | 0,00525 | 0,630 |
| A_21_P0005469 | XLOC_006350    | 0,09  | -0,58 | 0,6330 | 0,0009 | 0,00532 | 0,630 |
| A_21_P0012265 | XLOC_I2_009332 | -0,48 | 0,23  | 0,0083 | 0,2110 | 0,00532 | 0,630 |

|               |                |       |       |        |        |         |       |
|---------------|----------------|-------|-------|--------|--------|---------|-------|
| A_23_P8640    | GP             | 0,65  | 0,01  | 0,0001 | 0,9401 | 0,00532 | 0,630 |
| A_33_P3334047 |                | -0,24 | 0,48  | 0,2093 | 0,0078 | 0,00533 | 0,630 |
| A_21_P0004889 | XLOC_005311    | -0,41 | 0,31  | 0,0256 | 0,0906 | 0,00539 | 0,631 |
| A_33_P3415052 | NIPAL4         | -0,27 | 0,45  | 0,1531 | 0,0137 | 0,00545 | 0,631 |
| A_33_P3280927 | SNHG7          | 0,58  | -0,09 | 0,0010 | 0,6163 | 0,00553 | 0,631 |
| A_21_P0006028 | XLOC_007458    | 0,41  | -0,31 | 0,0252 | 0,0944 | 0,00554 | 0,631 |
| A_33_P3257451 | SRRM3          | -0,12 | 0,56  | 0,5202 | 0,0013 | 0,00555 | 0,631 |
| A_21_P0010829 | XLOC_I2_001597 | -0,48 | 0,23  | 0,0077 | 0,2292 | 0,00558 | 0,631 |
| A_21_P0004728 | C6orf218       | 0,26  | -0,45 | 0,1588 | 0,0135 | 0,00562 | 0,631 |
| A_33_P3438201 |                | -0,39 | 0,33  | 0,0353 | 0,0738 | 0,00564 | 0,631 |
| A_23_P417853  | MYO3B          | -0,23 | 0,47  | 0,2110 | 0,0090 | 0,00568 | 0,631 |
| A_24_P333857  | SGIP1          | 0,15  | -0,54 | 0,4322 | 0,0021 | 0,00569 | 0,631 |
| A_21_P0003858 | XLOC_003772    | 0,59  | -0,07 | 0,0008 | 0,6928 | 0,00570 | 0,631 |
| A_23_P4254    | CRYBA1         | -0,40 | 0,32  | 0,0312 | 0,0832 | 0,00570 | 0,631 |
| A_21_P0011116 | FEM1A          | 0,38  | -0,34 | 0,0408 | 0,0642 | 0,00572 | 0,631 |
| A_24_P84781   |                | -0,08 | 0,59  | 0,6790 | 0,0008 | 0,00578 | 0,634 |
| A_32_P137920  | RSPH4A         | 0,17  | -0,52 | 0,3582 | 0,0037 | 0,00581 | 0,635 |
| A_33_P3492087 | LOC284191      | 0,11  | -0,57 | 0,5641 | 0,0014 | 0,00584 | 0,635 |
| A_21_P0003859 | XLOC_003775    | 0,41  | -0,30 | 0,0238 | 0,1078 | 0,00588 | 0,636 |
| A_23_P117851  | CPLX3          | -0,41 | 0,30  | 0,0256 | 0,1040 | 0,00605 | 0,649 |
| A_23_P48535   | ARHGAP5        | -0,35 | 0,37  | 0,0614 | 0,0457 | 0,00606 | 0,649 |
| A_33_P3320283 |                | -0,37 | 0,34  | 0,0458 | 0,0628 | 0,00612 | 0,652 |
| A_33_P3404706 | SPN            | -0,51 | 0,18  | 0,0042 | 0,3495 | 0,00621 | 0,652 |
| A_21_P0009643 | LOC148145      | -0,30 | 0,41  | 0,1122 | 0,0241 | 0,00622 | 0,652 |
| A_21_P0014851 | LOC100652779   | -0,30 | 0,41  | 0,1135 | 0,0241 | 0,00630 | 0,652 |
| A_32_P170481  | LOC100240735   | -0,37 | 0,34  | 0,0423 | 0,0699 | 0,00631 | 0,652 |
| A_24_P944588  | ZNF682         | -0,26 | 0,44  | 0,1588 | 0,0156 | 0,00633 | 0,652 |
| A_23_P63870   | SAMD8          | 0,36  | -0,35 | 0,0528 | 0,0570 | 0,00637 | 0,652 |
| A_33_P3499102 | RBM10          | 0,56  | -0,11 | 0,0015 | 0,5735 | 0,00644 | 0,652 |

|                |                |       |       |        |        |         |       |
|----------------|----------------|-------|-------|--------|--------|---------|-------|
| A_21_P0003083  | XLOC_002975    | -0,38 | 0,32  | 0,0373 | 0,0805 | 0,00650 | 0,652 |
| A_21_P0003729  | XLOC_003907    | 0,40  | -0,30 | 0,0276 | 0,1019 | 0,00650 | 0,652 |
| A_21_P0014692  | LOC100288781   | -0,29 | 0,42  | 0,1262 | 0,0219 | 0,00651 | 0,652 |
| A_21_P0009906  | XLOC_013776    | -0,43 | 0,27  | 0,0177 | 0,1483 | 0,00652 | 0,652 |
| A_33_P3396129  | KATNB1         | -0,29 | 0,41  | 0,1139 | 0,0253 | 0,00659 | 0,652 |
| A_23_P416774   | CLIC5          | 0,38  | -0,33 | 0,0410 | 0,0751 | 0,00659 | 0,652 |
| A_21_P0013440  | XLOC_I2_013873 | -0,44 | 0,26  | 0,0160 | 0,1618 | 0,00662 | 0,652 |
| A_33_P3297651  | LOC100130540   | -0,31 | 0,40  | 0,0979 | 0,0298 | 0,00664 | 0,652 |
| A_21_P0007340  | XLOC_009416    | 0,37  | -0,34 | 0,0442 | 0,0699 | 0,00668 | 0,652 |
| A_19_P00317773 | IPW            | -0,31 | 0,39  | 0,0915 | 0,0326 | 0,00669 | 0,652 |
| A_33_P3301955  | PDE7A          | -0,60 | 0,05  | 0,0006 | 0,7960 | 0,00679 | 0,652 |
| A_23_P318860   | APLNR          | -0,14 | 0,54  | 0,4650 | 0,0027 | 0,00683 | 0,652 |
| A_24_P49106    | TCEAL7         | -0,25 | 0,44  | 0,1777 | 0,0141 | 0,00693 | 0,652 |
| A_33_P3397716  | LOC401320      | -0,35 | 0,35  | 0,0590 | 0,0557 | 0,00694 | 0,652 |
| A_33_P3215913  | TMEM184B       | 0,39  | -0,31 | 0,0323 | 0,0984 | 0,00700 | 0,652 |
| A_24_P706340   | FAM155A        | 0,38  | -0,32 | 0,0381 | 0,0854 | 0,00702 | 0,652 |
| A_33_P3381899  | SYNGR3         | -0,45 | 0,25  | 0,0144 | 0,1840 | 0,00704 | 0,652 |
| A_19_P00316340 | LOC100506860   | 0,42  | -0,28 | 0,0228 | 0,1318 | 0,00708 | 0,652 |
| A_33_P3762913  | LOC100216546   | -0,42 | 0,27  | 0,0206 | 0,1428 | 0,00709 | 0,652 |
| A_24_P277155   | HLTF           | 0,21  | -0,48 | 0,2719 | 0,0080 | 0,00716 | 0,652 |
| A_33_P3653912  | FAHD2A         | -0,43 | 0,27  | 0,0186 | 0,1553 | 0,00717 | 0,652 |
| A_33_P3319406  | ARHGAP21       | -0,51 | 0,17  | 0,0046 | 0,3670 | 0,00717 | 0,652 |
| A_33_P3222056  |                | -0,25 | 0,45  | 0,1873 | 0,0144 | 0,00719 | 0,652 |
| A_33_P3372699  | SEC14L4        | -0,46 | 0,23  | 0,0115 | 0,2182 | 0,00725 | 0,652 |
| A_21_P0006882  | XLOC_008522    | -0,22 | 0,47  | 0,2387 | 0,0102 | 0,00735 | 0,652 |
| A_23_P151150   | FOXMI          | -0,34 | 0,36  | 0,0665 | 0,0525 | 0,00737 | 0,652 |
| A_33_P3354076  | FAM172BP       | 0,06  | -0,58 | 0,7439 | 0,0009 | 0,00737 | 0,652 |
| A_21_P0005115  | RAB44          | 0,33  | -0,37 | 0,0730 | 0,0480 | 0,00744 | 0,652 |
| A_24_P307724   | FLJ33360       | -0,52 | 0,15  | 0,0037 | 0,4239 | 0,00744 | 0,652 |



|                |                |       |       |        |        |         |       |
|----------------|----------------|-------|-------|--------|--------|---------|-------|
| A_33_P3423504  | MAGEB17        | -0,21 | 0,47  | 0,2561 | 0,0093 | 0,00746 | 0,652 |
| A_21_P0011356  | GOLGA8IP       | 0,52  | -0,15 | 0,0037 | 0,4239 | 0,00749 | 0,652 |
| A_24_P312519   | PBLD           | -0,36 | 0,34  | 0,0510 | 0,0707 | 0,00761 | 0,652 |
| A_33_P3363186  |                | 0,32  | -0,38 | 0,0886 | 0,0394 | 0,00768 | 0,652 |
| A_21_P0006495  | XLOC_007974    | 0,00  | 0,62  | 0,9906 | 0,0003 | 0,00768 | 0,652 |
| A_33_P3285391  |                | -0,41 | 0,29  | 0,0267 | 0,1256 | 0,00769 | 0,652 |
| A_19_P00320028 | LOC100216546   | -0,44 | 0,25  | 0,0169 | 0,1777 | 0,00771 | 0,652 |
| A_21_P0001443  | XLOC_000635    | 0,33  | -0,36 | 0,0751 | 0,0489 | 0,00777 | 0,652 |
| A_33_P3400943  | C16orf5        | -0,20 | 0,48  | 0,2869 | 0,0081 | 0,00779 | 0,652 |
| A_21_P0009429  | XLOC_012692    | -0,33 | 0,37  | 0,0801 | 0,0458 | 0,00780 | 0,652 |
| A_23_P206077   | AEN            | 0,39  | -0,30 | 0,0337 | 0,1051 | 0,00782 | 0,652 |
| A_19_P00320996 | P39188         | -0,53 | 0,14  | 0,0032 | 0,4650 | 0,00782 | 0,652 |
| A_33_P3383094  |                | 0,44  | -0,25 | 0,0167 | 0,1808 | 0,00783 | 0,652 |
| A_23_P49849    | SEZ6           | 0,45  | -0,24 | 0,0145 | 0,2006 | 0,00786 | 0,652 |
| A_33_P3285334  | LOC100130417   | 0,43  | -0,25 | 0,0176 | 0,1761 | 0,00791 | 0,652 |
| A_33_P3544887  | TTC28          | 0,46  | -0,22 | 0,0111 | 0,2407 | 0,00795 | 0,652 |
| A_32_P720220   | C12orf36       | 0,36  | -0,33 | 0,0507 | 0,0742 | 0,00795 | 0,652 |
| A_21_P0014577  | LOC100506869   | -0,42 | 0,27  | 0,0223 | 0,1490 | 0,00798 | 0,652 |
| A_24_P89971    | SURF4          | 0,50  | -0,17 | 0,0055 | 0,3628 | 0,00799 | 0,652 |
| A_23_P216434   | ECM2           | 0,40  | -0,29 | 0,0306 | 0,1164 | 0,00800 | 0,652 |
| A_33_P3210810  | LINC00260      | -0,48 | 0,20  | 0,0084 | 0,2909 | 0,00808 | 0,652 |
| A_21_P0010366  | XLOC_014270    | 0,47  | -0,20 | 0,0089 | 0,2794 | 0,00810 | 0,652 |
| A_23_P44674    | CRIP1          | -0,44 | 0,25  | 0,0158 | 0,1881 | 0,00815 | 0,652 |
| A_33_P3317431  |                | 0,37  | -0,32 | 0,0425 | 0,0896 | 0,00817 | 0,652 |
| A_19_P00320242 | LOC100506948   | -0,45 | 0,23  | 0,0131 | 0,2209 | 0,00817 | 0,652 |
| A_21_P0009326  | XLOC_012482    | 0,10  | -0,55 | 0,5818 | 0,0020 | 0,00820 | 0,652 |
| A_21_P0010690  | XLOC_I2_000037 | -0,43 | 0,25  | 0,0184 | 0,1761 | 0,00820 | 0,652 |
| A_33_P3288609  | PAK1           | -0,27 | 0,41  | 0,1435 | 0,0243 | 0,00821 | 0,652 |
| A_21_P0012445  | XLOC_I2_010239 | -0,22 | 0,46  | 0,2510 | 0,0109 | 0,00824 | 0,652 |

|                |                |       |       |        |        |         |       |
|----------------|----------------|-------|-------|--------|--------|---------|-------|
| A_23_P72059    | VSIG10         | -0,23 | 0,45  | 0,2119 | 0,0134 | 0,00824 | 0,652 |
| A_33_P3315385  | MPPED2         | -0,42 | 0,27  | 0,0228 | 0,1517 | 0,00830 | 0,652 |
| A_24_P944640   | EPB41L5        | -0,22 | 0,46  | 0,2505 | 0,0110 | 0,00831 | 0,652 |
| A_21_P0005772  | XLOC_006941    | -0,26 | 0,42  | 0,1669 | 0,0201 | 0,00832 | 0,652 |
| A_23_P10194    | SEZ6L2         | -0,27 | 0,41  | 0,1490 | 0,0228 | 0,00836 | 0,652 |
| A_19_P00318909 | XLOC_I2_010751 | -0,27 | 0,41  | 0,1476 | 0,0239 | 0,00838 | 0,652 |
| A_21_P0013702  | XLOC_I2_014876 | -0,15 | 0,51  | 0,4350 | 0,0041 | 0,00838 | 0,652 |
| A_23_P131785   | BPI            | 0,45  | -0,23 | 0,0139 | 0,2173 | 0,00840 | 0,652 |
| A_23_P44207    | ACOT12         | -0,23 | 0,44  | 0,2110 | 0,0147 | 0,00846 | 0,652 |
| A_21_P0002265  | XLOC_001608    | -0,30 | 0,39  | 0,1090 | 0,0355 | 0,00851 | 0,652 |
| A_33_P3280811  | TTC16          | -0,18 | 0,49  | 0,3349 | 0,0069 | 0,00853 | 0,652 |
| A_33_P3751230  | LOC284628      | -0,29 | 0,39  | 0,1179 | 0,0325 | 0,00853 | 0,652 |
| A_21_P0007689  | XLOC_010023    | -0,33 | 0,36  | 0,0759 | 0,0534 | 0,00854 | 0,652 |
| A_32_P216520   | WIF1           | 0,35  | -0,34 | 0,0570 | 0,0707 | 0,00855 | 0,652 |
| A_33_P3411307  | LOC100130276   | -0,50 | 0,17  | 0,0055 | 0,3833 | 0,00865 | 0,652 |
| A_21_P0000902  | LOC100287559   | -0,21 | 0,46  | 0,2585 | 0,0110 | 0,00865 | 0,652 |
| A_24_P923945   | UBR4           | -0,44 | 0,24  | 0,0169 | 0,1966 | 0,00866 | 0,652 |
| A_19_P00805593 | XLOC_008652    | -0,35 | 0,34  | 0,0617 | 0,0672 | 0,00870 | 0,652 |
| A_33_P3245818  | PQLC1          | -0,30 | 0,39  | 0,1116 | 0,0355 | 0,00872 | 0,652 |
| A_33_P3253975  | ACAT1          | 0,12  | -0,53 | 0,5357 | 0,0027 | 0,00873 | 0,652 |
| A_33_P3310512  |                | 0,32  | -0,36 | 0,0832 | 0,0498 | 0,00876 | 0,652 |
| A_21_P0012701  | XLOC_I2_011411 | 0,41  | -0,27 | 0,0236 | 0,1553 | 0,00876 | 0,652 |
| A_21_P0014293  | LOC100506104   | 0,09  | 0,66  | 0,6482 | 0,0001 | 0,00885 | 0,656 |
| A_33_P3216150  | PRB4           | 0,35  | -0,34 | 0,0600 | 0,0707 | 0,00889 | 0,656 |
| A_33_P3300132  | FP6628         | -0,47 | 0,20  | 0,0097 | 0,2869 | 0,00898 | 0,659 |
| A_24_P133905   | CCL23          | 0,23  | -0,45 | 0,2274 | 0,0141 | 0,00899 | 0,659 |
| A_21_P0002907  | XLOC_003327    | -0,33 | 0,35  | 0,0755 | 0,0576 | 0,00912 | 0,664 |
| A_33_P3723580  | LOC339975      | 0,39  | -0,28 | 0,0320 | 0,1271 | 0,00914 | 0,664 |
| A_21_P0001553  | XLOC_000932    | 0,26  | -0,42 | 0,1684 | 0,0223 | 0,00918 | 0,664 |

|               |                |       |       |        |        |         |       |
|---------------|----------------|-------|-------|--------|--------|---------|-------|
| A_23_P39647   | SLC4A3         | -0,34 | 0,35  | 0,0707 | 0,0621 | 0,00918 | 0,664 |
| A_23_P80040   | PROCR          | -0,29 | 0,39  | 0,1244 | 0,0324 | 0,00921 | 0,664 |
| A_21_P0010475 | XLOC_014334    | 0,04  | -0,58 | 0,8252 | 0,0009 | 0,00930 | 0,668 |
| A_33_P3393341 | LPIN3          | -0,43 | 0,24  | 0,0176 | 0,1972 | 0,00936 | 0,668 |
| A_24_P145122  | NUCKS1         | 0,47  | -0,20 | 0,0096 | 0,2990 | 0,00937 | 0,668 |
| A_33_P3358686 |                | -0,49 | 0,17  | 0,0062 | 0,3811 | 0,00943 | 0,668 |
| A_21_P0008384 | XLOC_010923    | 0,29  | -0,38 | 0,1142 | 0,0378 | 0,00945 | 0,668 |
| A_33_P3405936 | METTLL11B      | -0,27 | 0,40  | 0,1476 | 0,0268 | 0,00947 | 0,668 |
| A_21_P0001725 | XLOC_000808    | -0,46 | 0,20  | 0,0104 | 0,2869 | 0,00949 | 0,668 |
| A_32_P52206   | TYW1           | -0,44 | 0,23  | 0,0170 | 0,2110 | 0,00952 | 0,668 |
| A_21_P0003584 | XLOC_003479    | 0,48  | -0,18 | 0,0083 | 0,3290 | 0,00954 | 0,668 |
| A_23_P159191  | GAST           | -0,49 | 0,17  | 0,0070 | 0,3620 | 0,00963 | 0,671 |
| A_23_P321501  | DHRS2          | -0,19 | 0,47  | 0,3071 | 0,0096 | 0,00971 | 0,673 |
| A_21_P0006491 | XLOC_007958    | -0,40 | 0,27  | 0,0291 | 0,1458 | 0,00973 | 0,673 |
| A_21_P0007955 | XLOC_010464    | -0,47 | 0,20  | 0,0093 | 0,3001 | 0,00976 | 0,673 |
| A_33_P3369063 |                | 0,42  | -0,25 | 0,0223 | 0,1785 | 0,00981 | 0,673 |
| A_33_P3366028 | C20orf118      | -0,36 | 0,31  | 0,0486 | 0,0954 | 0,00983 | 0,673 |
| A_33_P3290338 | PARP1          | -0,47 | 0,20  | 0,0102 | 0,2990 | 0,00984 | 0,673 |
| A_21_P0013119 | XLOC_I2_013233 | 0,26  | -0,41 | 0,1707 | 0,0243 | 0,00998 | 0,681 |
| A_21_P0002096 | XLOC_002298    | 0,59  | -0,02 | 0,0008 | 0,9009 | 0,01007 | 0,684 |
| A_33_P3271945 | HAUS6          | -0,32 | 0,35  | 0,0814 | 0,0604 | 0,01026 | 0,693 |
| A_33_P3374035 | PDXK           | -0,21 | 0,45  | 0,2616 | 0,0138 | 0,01051 | 0,693 |
| A_33_P3379926 | SLC17A4        | 0,45  | -0,21 | 0,0120 | 0,2768 | 0,01052 | 0,693 |
| A_21_P0005507 | XLOC_006495    | 0,47  | -0,19 | 0,0098 | 0,3219 | 0,01053 | 0,693 |
| A_21_P0014491 | LOC100507546   | 0,17  | -0,48 | 0,3696 | 0,0076 | 0,01054 | 0,693 |
| A_23_P250358  | HERC6          | -0,36 | 0,31  | 0,0538 | 0,0934 | 0,01056 | 0,693 |
| A_23_P119448  | PPP6R1         | 0,35  | -0,32 | 0,0563 | 0,0896 | 0,01057 | 0,693 |
| A_33_P3240043 |                | 0,60  | -0,01 | 0,0006 | 0,9700 | 0,01059 | 0,693 |
| A_21_P0002009 | LOC339788      | -0,46 | 0,20  | 0,0120 | 0,2880 | 0,01062 | 0,693 |

|                |             |       |       |        |        |         |       |
|----------------|-------------|-------|-------|--------|--------|---------|-------|
| A_21_P0012275  | SLC9B1      | 0,36  | -0,31 | 0,0501 | 0,1009 | 0,01070 | 0,693 |
| A_21_P0005439  | XLOC_006281 | 0,45  | -0,21 | 0,0132 | 0,2730 | 0,01071 | 0,693 |
| A_23_P144490   | DCHS2       | -0,18 | 0,47  | 0,3337 | 0,0094 | 0,01073 | 0,693 |
| A_33_P3321906  |             | -0,43 | 0,23  | 0,0179 | 0,2269 | 0,01076 | 0,693 |
| A_24_P70183    | MYH11       | -0,45 | 0,21  | 0,0142 | 0,2636 | 0,01087 | 0,693 |
| A_21_P0002688  | XLOC_002433 | 0,09  | -0,54 | 0,6516 | 0,0023 | 0,01088 | 0,693 |
| A_33_P3406281  | SAMHD1      | -0,33 | 0,34  | 0,0801 | 0,0653 | 0,01088 | 0,693 |
| A_23_P74290    | GBP5        | -0,41 | 0,25  | 0,0233 | 0,1858 | 0,01092 | 0,693 |
| A_21_P0004453  | XLOC_005040 | 0,22  | -0,43 | 0,2330 | 0,0173 | 0,01092 | 0,693 |
| A_33_P3339100  | SELP        | 0,40  | -0,27 | 0,0307 | 0,1517 | 0,01093 | 0,693 |
| A_33_P3213374  | CITED2      | 0,66  | 0,09  | 0,0001 | 0,6308 | 0,01093 | 0,693 |
| A_21_P0002358  | XLOC_001872 | -0,24 | 0,42  | 0,1947 | 0,0227 | 0,01096 | 0,693 |
| A_33_P3239884  | NCAM2       | -0,30 | 0,36  | 0,1062 | 0,0489 | 0,01103 | 0,693 |
| A_24_P647682   |             | 0,24  | -0,42 | 0,2040 | 0,0205 | 0,01103 | 0,693 |
| A_23_P163711   | FAM57B      | -0,05 | 0,57  | 0,8051 | 0,0013 | 0,01106 | 0,693 |
| A_33_P3789693  | MGC24103    | 0,36  | -0,30 | 0,0486 | 0,1083 | 0,01119 | 0,693 |
| A_23_P372308   | RGMA        | -0,28 | 0,38  | 0,1356 | 0,0373 | 0,01121 | 0,693 |
| A_33_P3394075  | RIT1        | 0,32  | -0,34 | 0,0819 | 0,0661 | 0,01123 | 0,693 |
| A_23_P129144   | MYZAP       | 0,49  | -0,15 | 0,0068 | 0,4143 | 0,01132 | 0,693 |
| A_21_P0001625  | XLOC_001208 | 0,43  | -0,22 | 0,0179 | 0,2359 | 0,01134 | 0,693 |
| A_21_P0003237  | XLOC_002716 | -0,15 | 0,49  | 0,4184 | 0,0067 | 0,01135 | 0,693 |
| A_21_P0000287  | SNORD47     | 0,43  | -0,23 | 0,0193 | 0,2246 | 0,01138 | 0,693 |
| A_33_P3418621  | VPREB1      | -0,52 | 0,11  | 0,0036 | 0,5562 | 0,01139 | 0,693 |
| A_23_P106682   | EMP2        | 0,33  | -0,34 | 0,0784 | 0,0703 | 0,01142 | 0,693 |
| A_23_P38328    | DBF4B       | -0,46 | 0,19  | 0,0108 | 0,3242 | 0,01142 | 0,693 |
| A_23_P112798   | CRIP2       | -0,51 | 0,12  | 0,0042 | 0,5218 | 0,01143 | 0,693 |
| A_21_P0014893  | LOC645561   | -0,20 | 0,45  | 0,2858 | 0,0126 | 0,01145 | 0,693 |
| A_19_P00329806 | HOTAIR      | 0,49  | -0,15 | 0,0055 | 0,4415 | 0,01145 | 0,693 |
| A_33_P3238305  | C21orf7     | 0,42  | -0,24 | 0,0214 | 0,2101 | 0,01146 | 0,693 |

|                |                |       |       |        |        |         |       |
|----------------|----------------|-------|-------|--------|--------|---------|-------|
| A_23_P335239   | GAB1           | -0,32 | 0,34  | 0,0832 | 0,0665 | 0,01147 | 0,693 |
| A_21_P0013501  | CDK5           | 0,43  | -0,23 | 0,0185 | 0,2264 | 0,01152 | 0,693 |
| A_32_P10133    | PRINS          | 0,35  | -0,31 | 0,0586 | 0,0944 | 0,01156 | 0,693 |
| A_23_P4773     | LILRB5         | -0,32 | 0,34  | 0,0836 | 0,0672 | 0,01165 | 0,693 |
| A_24_P29733    | CDK14          | 0,27  | -0,39 | 0,1560 | 0,0329 | 0,01168 | 0,693 |
| A_33_P3322050  | DYRK1A         | -0,24 | 0,42  | 0,2061 | 0,0228 | 0,01173 | 0,693 |
| A_33_P3424489  |                | 0,48  | -0,16 | 0,0082 | 0,3853 | 0,01174 | 0,693 |
| A_23_P404667   | BIK            | 0,49  | -0,15 | 0,0064 | 0,4193 | 0,01177 | 0,693 |
| A_33_P3274189  |                | -0,30 | 0,36  | 0,1072 | 0,0513 | 0,01178 | 0,693 |
| A_21_P0005300  | XLOC_006422    | 0,28  | -0,38 | 0,1331 | 0,0405 | 0,01179 | 0,693 |
| A_21_P0014848  | TMEM165        | 0,11  | -0,52 | 0,5641 | 0,0037 | 0,01181 | 0,693 |
| A_33_P3642036  | LOC100289333   | -0,46 | 0,19  | 0,0114 | 0,3219 | 0,01186 | 0,693 |
| A_21_P0002407  | XLOC_002002    | 0,39  | -0,26 | 0,0333 | 0,1567 | 0,01187 | 0,693 |
| A_33_P3359683  | IL16           | -0,14 | 0,49  | 0,4435 | 0,0063 | 0,01192 | 0,693 |
| A_19_P00808794 | XLOC_I2_008221 | -0,49 | 0,15  | 0,0069 | 0,4253 | 0,01198 | 0,693 |
| A_24_P336577   | C1orf183       | -0,35 | 0,31  | 0,0593 | 0,0966 | 0,01198 | 0,693 |
| A_24_P232790   | C14orf162      | -0,35 | 0,31  | 0,0600 | 0,0959 | 0,01199 | 0,693 |
| A_21_P0001224  | XLOC_001211    | 0,49  | -0,15 | 0,0059 | 0,4415 | 0,01201 | 0,693 |
| A_33_P3341906  | C10orf128      | -0,18 | 0,46  | 0,3303 | 0,0113 | 0,01206 | 0,694 |
| A_21_P0008558  | LOC145837      | -0,24 | 0,41  | 0,2058 | 0,0236 | 0,01209 | 0,694 |
| A_23_P141894   | PVR            | 0,54  | -0,07 | 0,0019 | 0,7050 | 0,01213 | 0,695 |
| A_33_P3301297  |                | 0,60  | 0,01  | 0,0006 | 0,9550 | 0,01219 | 0,695 |
| A_21_P0007917  | XLOC_010706    | -0,46 | 0,18  | 0,0114 | 0,3290 | 0,01221 | 0,695 |
| A_33_P3250333  | DNAH10         | 0,30  | -0,35 | 0,1025 | 0,0573 | 0,01229 | 0,696 |
| A_33_P3389779  | WDR33          | -0,22 | 0,42  | 0,2321 | 0,0203 | 0,01232 | 0,696 |
| A_33_P3285734  | FCRL6          | 0,49  | -0,14 | 0,0066 | 0,4449 | 0,01234 | 0,696 |
| A_33_P3237135  | MMP2           | 0,38  | -0,27 | 0,0373 | 0,1490 | 0,01239 | 0,696 |
| A_33_P3356696  | LOC100134409   | 0,19  | -0,45 | 0,3035 | 0,0134 | 0,01241 | 0,696 |
| A_23_P58407    | UGT2B15        | 0,42  | -0,23 | 0,0210 | 0,2292 | 0,01248 | 0,696 |

|                |                |       |       |        |        |         |       |
|----------------|----------------|-------|-------|--------|--------|---------|-------|
| A_33_P3228718  | CLEC19A        | 0,31  | -0,35 | 0,0999 | 0,0595 | 0,01252 | 0,696 |
| A_32_P196021   | FGF7           | 0,37  | -0,28 | 0,0449 | 0,1297 | 0,01256 | 0,696 |
| A_23_P250164   | HGD            | 0,23  | -0,42 | 0,2209 | 0,0223 | 0,01257 | 0,696 |
| A_21_P0006830  | XLOC_008374    | 0,48  | -0,15 | 0,0078 | 0,4143 | 0,01263 | 0,696 |
| A_33_P3229390  |                | 0,53  | -0,09 | 0,0027 | 0,6347 | 0,01265 | 0,696 |
| A_21_P0008131  | XLOC_010535    | -0,47 | 0,17  | 0,0093 | 0,3798 | 0,01266 | 0,696 |
| A_21_P0008355  | XLOC_010876    | -0,46 | 0,18  | 0,0114 | 0,3406 | 0,01271 | 0,696 |
| A_19_P00321670 | XLOC_005730    | -0,23 | 0,42  | 0,2274 | 0,0217 | 0,01271 | 0,696 |
| A_23_P2294     | HELB           | -0,19 | 0,45  | 0,3080 | 0,0135 | 0,01273 | 0,696 |
| A_21_P0003718  | XLOC_003878    | -0,49 | 0,15  | 0,0072 | 0,4364 | 0,01275 | 0,696 |
| A_24_P222872   | UGT1A6         | 0,32  | -0,33 | 0,0823 | 0,0755 | 0,01280 | 0,696 |
| A_33_P3356816  | LCE1B          | -0,33 | 0,32  | 0,0768 | 0,0805 | 0,01283 | 0,696 |
| A_21_P0006008  | POLR1E         | -0,23 | 0,42  | 0,2209 | 0,0221 | 0,01283 | 0,696 |
| A_33_P3238335  | MCOLN3         | 0,35  | -0,30 | 0,0607 | 0,1025 | 0,01295 | 0,699 |
| A_21_P0009674  | XLOC_013405    | -0,33 | 0,32  | 0,0742 | 0,0850 | 0,01299 | 0,699 |
| A_21_P0000077  | DZIP1L         | -0,35 | 0,30  | 0,0597 | 0,1051 | 0,01307 | 0,699 |
| A_21_P0013467  | FAM66C         | 0,38  | -0,27 | 0,0398 | 0,1490 | 0,01307 | 0,699 |
| A_21_P0014074  | LOC100505516   | -0,27 | 0,38  | 0,1510 | 0,0393 | 0,01313 | 0,699 |
| A_21_P0008928  | XLOC_011708    | 0,18  | -0,46 | 0,3532 | 0,0112 | 0,01319 | 0,699 |
| A_33_P3290588  | ASPSCR1        | -0,41 | 0,23  | 0,0234 | 0,2228 | 0,01319 | 0,699 |
| A_33_P3415491  | WDR90          | -0,20 | 0,44  | 0,2902 | 0,0157 | 0,01322 | 0,699 |
| A_33_P3389298  | ZNF30          | -0,36 | 0,29  | 0,0498 | 0,1250 | 0,01324 | 0,699 |
| A_23_P44857    |                | 0,35  | -0,30 | 0,0561 | 0,1118 | 0,01331 | 0,699 |
| A_21_P0012639  | XLOC_I2_010963 | -0,13 | 0,49  | 0,4915 | 0,0060 | 0,01341 | 0,699 |
| A_33_P3212575  | NNAT           | -0,36 | 0,28  | 0,0492 | 0,1284 | 0,01346 | 0,699 |
| A_23_P217428   | ARHGAP6        | -0,44 | 0,20  | 0,0155 | 0,2903 | 0,01356 | 0,699 |
| A_21_P0006674  | XLOC_008466    | 0,40  | -0,24 | 0,0276 | 0,2048 | 0,01359 | 0,699 |
| A_24_P920979   | ASB7           | 0,42  | -0,22 | 0,0210 | 0,2465 | 0,01362 | 0,699 |
| A_23_P43157    | MYBL1          | 0,21  | -0,43 | 0,2657 | 0,0188 | 0,01364 | 0,699 |

|                |                |       |       |        |        |         |       |
|----------------|----------------|-------|-------|--------|--------|---------|-------|
| A_24_P186342   | ZFP14          | -0,43 | 0,20  | 0,0173 | 0,2794 | 0,01364 | 0,699 |
| A_19_P00328053 | XLOC_010669    | 0,38  | -0,27 | 0,0418 | 0,1490 | 0,01364 | 0,699 |
| A_33_P3232478  | CACNA2D1       | -0,18 | 0,45  | 0,3278 | 0,0134 | 0,01372 | 0,699 |
| A_19_P00801867 | LOC100129434   | -0,34 | 0,31  | 0,0691 | 0,0964 | 0,01373 | 0,699 |
| A_23_P45011    | PPP1R14C       | 0,46  | -0,18 | 0,0121 | 0,3495 | 0,01378 | 0,699 |
| A_32_P163247   | CD8A           | 0,33  | -0,32 | 0,0771 | 0,0873 | 0,01382 | 0,699 |
| A_33_P3390731  | AKTIP          | 0,23  | -0,41 | 0,2191 | 0,0254 | 0,01382 | 0,699 |
| A_24_P128233   | SCN5A          | -0,22 | 0,42  | 0,2330 | 0,0233 | 0,01383 | 0,699 |
| A_19_P00316808 | LOC100129936   | -0,50 | 0,12  | 0,0054 | 0,5310 | 0,01398 | 0,699 |
| A_19_P00809915 | XLOC_006829    | -0,38 | 0,27  | 0,0410 | 0,1553 | 0,01404 | 0,699 |
| A_33_P3281283  | S1PR3          | 0,48  | -0,15 | 0,0086 | 0,4267 | 0,01406 | 0,699 |
| A_33_P3263002  | LOC100130348   | 0,43  | -0,20 | 0,0179 | 0,2815 | 0,01409 | 0,699 |
| A_21_P0011259  | XLOC_I2_004317 | -0,30 | 0,34  | 0,1046 | 0,0657 | 0,01420 | 0,699 |
| A_33_P3316953  | RBFOX3         | 0,40  | -0,24 | 0,0279 | 0,2101 | 0,01422 | 0,699 |
| A_32_P128701   | USP53          | -0,40 | 0,24  | 0,0306 | 0,1975 | 0,01423 | 0,699 |
| A_33_P3305458  | ATF6B          | 0,40  | -0,24 | 0,0314 | 0,1941 | 0,01426 | 0,699 |
| A_33_P3235078  | TRIM17         | -0,41 | 0,23  | 0,0265 | 0,2191 | 0,01428 | 0,699 |
| A_33_P3267160  |                | -0,28 | 0,36  | 0,1376 | 0,0486 | 0,01432 | 0,699 |
| A_23_P137035   | PIR            | 0,37  | -0,27 | 0,0460 | 0,1442 | 0,01435 | 0,699 |
| A_33_P3277808  |                | -0,29 | 0,35  | 0,1185 | 0,0586 | 0,01451 | 0,699 |
| A_33_P3210423  | MED1           | -0,42 | 0,22  | 0,0225 | 0,2426 | 0,01454 | 0,699 |
| A_19_P00810085 |                | 0,16  | -0,46 | 0,3929 | 0,0105 | 0,01456 | 0,699 |
| A_33_P3277688  | LOC100132344   | -0,25 | 0,38  | 0,1761 | 0,0366 | 0,01462 | 0,699 |
| A_33_P3214012  | HMGCLL1        | 0,12  | -0,49 | 0,5141 | 0,0056 | 0,01463 | 0,699 |
| A_21_P0012103  | XLOC_I2_008405 | -0,33 | 0,31  | 0,0738 | 0,0966 | 0,01467 | 0,699 |
| A_21_P0013215  | XLOC_I2_013443 | 0,47  | -0,15 | 0,0095 | 0,4184 | 0,01475 | 0,699 |
| A_24_P45446    | GBP4           | -0,27 | 0,37  | 0,1559 | 0,0436 | 0,01483 | 0,699 |
| A_33_P3385431  |                | -0,41 | 0,22  | 0,0253 | 0,2340 | 0,01484 | 0,699 |
| A_21_P0013999  | LOC100653051   | -0,47 | 0,15  | 0,0092 | 0,4139 | 0,01486 | 0,699 |

|                |              |       |       |        |        |         |       |
|----------------|--------------|-------|-------|--------|--------|---------|-------|
| A_33_P3396886  | C11orf52     | -0,26 | 0,38  | 0,1692 | 0,0386 | 0,01487 | 0,699 |
| A_24_P272088   | SPTB         | 0,47  | -0,16 | 0,0100 | 0,4105 | 0,01487 | 0,699 |
| A_33_P3309911  | PRAMEF5      | 0,35  | -0,29 | 0,0563 | 0,1259 | 0,01488 | 0,699 |
| A_33_P3249524  | SPDYE2       | -0,33 | 0,30  | 0,0710 | 0,1019 | 0,01488 | 0,699 |
| A_23_P6818     | SEMA3G       | 0,31  | -0,33 | 0,0984 | 0,0738 | 0,01489 | 0,699 |
| A_21_P0000137  | BEAN1        | -0,15 | 0,47  | 0,4184 | 0,0096 | 0,01493 | 0,699 |
| A_21_P0014563  | LOC100505675 | -0,38 | 0,25  | 0,0376 | 0,1769 | 0,01500 | 0,699 |
| A_21_P0005788  | XLOC_006980  | -0,24 | 0,39  | 0,1922 | 0,0337 | 0,01502 | 0,699 |
| A_21_P0008553  | XLOC_011181  | 0,27  | -0,36 | 0,1435 | 0,0489 | 0,01504 | 0,699 |
| A_32_P113154   |              | 0,49  | -0,12 | 0,0061 | 0,5264 | 0,01510 | 0,699 |
| A_23_P152002   | BCL2A1       | 0,50  | -0,11 | 0,0053 | 0,5593 | 0,01510 | 0,699 |
| A_24_P167683   | ITPK1        | 0,37  | -0,27 | 0,0465 | 0,1483 | 0,01512 | 0,699 |
| A_21_P0003826  | XLOC_003440  | 0,19  | -0,43 | 0,3046 | 0,0172 | 0,01512 | 0,699 |
| A_21_P0003561  | XLOC_003430  | 0,30  | -0,34 | 0,1079 | 0,0676 | 0,01516 | 0,699 |
| A_33_P3325708  |              | -0,02 | 0,56  | 0,9102 | 0,0012 | 0,01516 | 0,699 |
| A_24_P865226   | LOC440356    | 0,28  | -0,35 | 0,1268 | 0,0573 | 0,01523 | 0,699 |
| A_23_P211039   | ADAMTS1      | 0,52  | -0,08 | 0,0032 | 0,6618 | 0,01530 | 0,699 |
| A_33_P3405022  | LETM1        | 0,52  | -0,08 | 0,0035 | 0,6738 | 0,01532 | 0,699 |
| A_33_P3325231  | LOC728684    | -0,22 | 0,41  | 0,2426 | 0,0249 | 0,01532 | 0,699 |
| A_24_P305938   | RAB9BP1      | 0,50  | -0,11 | 0,0052 | 0,5489 | 0,01533 | 0,699 |
| A_33_P3385351  |              | 0,22  | -0,41 | 0,2416 | 0,0251 | 0,01533 | 0,699 |
| A_33_P3356792  | GGT7         | -0,41 | 0,22  | 0,0236 | 0,2525 | 0,01538 | 0,699 |
| A_33_P3249958  | LOC642852    | -0,31 | 0,33  | 0,0969 | 0,0780 | 0,01543 | 0,699 |
| A_23_P92727    | RAI14        | -0,41 | 0,21  | 0,0236 | 0,2535 | 0,01545 | 0,699 |
| A_19_P00322592 | XLOC_012826  | -0,25 | 0,39  | 0,1881 | 0,0360 | 0,01547 | 0,699 |
| A_23_P60009    | ANXA13       | -0,35 | 0,29  | 0,0625 | 0,1196 | 0,01550 | 0,699 |
| A_33_P3231923  |              | 0,41  | -0,21 | 0,0234 | 0,2566 | 0,01551 | 0,699 |
| A_33_P3381464  |              | -0,27 | 0,37  | 0,1531 | 0,0469 | 0,01553 | 0,699 |
| A_21_P0000311  | SNORA14A     | -0,24 | 0,39  | 0,2066 | 0,0320 | 0,01562 | 0,699 |



|                |              |       |       |        |        |         |       |
|----------------|--------------|-------|-------|--------|--------|---------|-------|
| A_33_P3222109  | XG           | 0,43  | -0,20 | 0,0186 | 0,2979 | 0,01563 | 0,699 |
| A_21_P0004874  | XLOC_005263  | -0,05 | 0,54  | 0,7924 | 0,0023 | 0,01563 | 0,699 |
| A_23_P209978   | VSNL1        | 0,43  | -0,19 | 0,0176 | 0,3092 | 0,01567 | 0,699 |
| A_23_P120629   | ASIP         | -0,11 | 0,50  | 0,5578 | 0,0057 | 0,01567 | 0,699 |
| A_21_P0008187  | XLOC_010670  | 0,26  | -0,37 | 0,1625 | 0,0441 | 0,01569 | 0,699 |
| A_21_P0009202  | LOC100499467 | 0,52  | -0,09 | 0,0039 | 0,6533 | 0,01572 | 0,699 |
| A_33_P3402091  | MERTK        | 0,32  | -0,31 | 0,0818 | 0,0939 | 0,01575 | 0,699 |
| A_33_P3362208  | LOC100129233 | -0,32 | 0,31  | 0,0805 | 0,0959 | 0,01575 | 0,699 |
| A_33_P3400823  | C1orf190     | -0,48 | 0,13  | 0,0076 | 0,4900 | 0,01577 | 0,699 |
| A_33_P3321996  |              | -0,27 | 0,36  | 0,1490 | 0,0495 | 0,01580 | 0,699 |
| A_33_P3220939  | PCID2        | 0,34  | -0,29 | 0,0646 | 0,1185 | 0,01583 | 0,699 |
| A_21_P0014443  | LOC100507473 | -0,33 | 0,30  | 0,0759 | 0,1020 | 0,01585 | 0,699 |
| A_24_P222997   | ZRANB3       | -0,34 | 0,30  | 0,0695 | 0,1111 | 0,01586 | 0,699 |
| A_33_P3219840  | ZNRD1-AS1    | -0,38 | 0,25  | 0,0372 | 0,1848 | 0,01589 | 0,699 |
| A_33_P3379061  | C9orf47      | 0,53  | -0,06 | 0,0029 | 0,7350 | 0,01594 | 0,699 |
| A_33_P3321372  | CNTNAP3      | 0,40  | -0,23 | 0,0283 | 0,2302 | 0,01596 | 0,699 |
| A_21_P0011645  | LINC00483    | -0,32 | 0,32  | 0,0873 | 0,0901 | 0,01599 | 0,699 |
| A_23_P35309    | TAF5L        | -0,41 | 0,21  | 0,0248 | 0,2535 | 0,01605 | 0,699 |
| A_21_P0001762  | LOC100506929 | -0,52 | 0,08  | 0,0040 | 0,6567 | 0,01606 | 0,699 |
| A_33_P3237201  | SYT1         | 0,34  | -0,29 | 0,0639 | 0,1214 | 0,01606 | 0,699 |
| A_24_P64407    | HMX2         | -0,29 | 0,34  | 0,1196 | 0,0650 | 0,01607 | 0,699 |
| A_19_P00806593 | XLOC_005273  | -0,09 | 0,51  | 0,6414 | 0,0038 | 0,01608 | 0,699 |
| A_33_P3230594  | LOC100507547 | 0,34  | -0,29 | 0,0680 | 0,1150 | 0,01609 | 0,699 |
| A_32_P23308    | LOC257358    | 0,32  | -0,31 | 0,0836 | 0,0949 | 0,01615 | 0,699 |
| A_33_P3334436  |              | -0,30 | 0,33  | 0,1105 | 0,0714 | 0,01619 | 0,699 |
| A_21_P0001449  | XLOC_000643  | -0,59 | -0,02 | 0,0008 | 0,9270 | 0,01622 | 0,699 |
| A_33_P3243702  | KLHL30       | 0,18  | -0,44 | 0,3434 | 0,0156 | 0,01631 | 0,699 |
| A_23_P400515   | KIF17        | -0,37 | 0,26  | 0,0460 | 0,1632 | 0,01635 | 0,699 |
| A_33_P3401647  | PPP1R14A     | -0,33 | 0,31  | 0,0794 | 0,1006 | 0,01640 | 0,699 |

A\_33\_P3314710

0,53

-0,07

0,0032

0,7244

0,01641

0,699
